# Supplementary material for: HfCl4–phosphoric acid catalyzed reduction of in situ generated carbocations with hydrosilane: facile approaches to 2,4-dihydrocyclopenta[b]indoles
Source: Royal Society of Chemistry journal article supplement (doi:10.1039/d4qo00874j), 2024-01-01
Supplement: d4qo00874j1.pdf [file d4qo00874j1.pdf]

## Supporting Information

### HfCl<sub>4</sub>-Phosphoric acid catalytic reduction of in situ generated carbocations with hydrosilane: facile approaches to 2,4- dihydrocyclopent[*b*]indoles

Man Wang,<sup>a</sup> Junyan Zhao,<sup>a</sup> Junda Zhao,<sup>a</sup> Ran Song,<sup>a</sup> Daoshan Yang,<sup>a</sup> Long Zhang,<sup>\*,b</sup>  
and Jian Lv<sup>\*,a</sup>

<sup>a</sup> Key Laboratory of Optic-Electric Sensing and Analytic Chemistry for Life Sciences, MOE, College of Chemistry and Molecular Engineering, Qingdao University of Science & Technology, Qingdao 266042, China

<sup>b</sup> Center of Basic Molecular Science, Department of Chemistry, Tsinghua University, Beijing 100084 (China)

\*Email: lvjian@iccas.ac.cn; zhanglong@tsinghua.edu.cn

## TABLE OF CONTENTS

|                                                                  |      |
|------------------------------------------------------------------|------|
| I. General Experimental Information and Materials.....           | S2   |
| II. Synthesis and Examination of New Stabilized Carbocation..... | S3   |
| III. Optimization.....                                           | S10  |
| IV. Experimental Procedures and Characterization Data.....       | S15  |
| V. Control Reaction.....                                         | S36  |
| VI. Deuterium-labelling Experiments.....                         | S47  |
| VII. UV-vis Spectra of Hf(OTf) <sub>4</sub> /PA/ <b>1a</b> ..... | S59  |
| VIII. X-ray Structure.....                                       | S60  |
| IX. Computational Data.....                                      | S64  |
| X. NMR Spectra.....                                              | S97  |
| XI. Reference.....                                               | S142 |

## I. General Experimental Information and Materials

All commercial reagents were used without further purification unless otherwise noted. Solvents were freshly dried according to *the purification handbook Purification of Laboratory Chemicals* before using. Proton and carbon magnetic resonance spectra ( $^1\text{H}$  NMR and  $^{13}\text{C}$  NMR) were recorded on a Bruker Avance 500MHz spectrometer. Tetramethylsilane (TMS) served as the internal standard for  $^1\text{H}$  NMR, and  $\text{CDCl}_3$  or  $\text{DMSO-d}_6$  served as the internal standard for  $^{13}\text{C}$  NMR.  $^1\text{H}$  NMR data were reported as follows: chemical shift, multiplicity (s = singlet, d = doublet, t = triplet, m = multiplet, td = triplet of doublet, dt = doublet of triplet, dd = doublet of doublet), coupling constants (Hz), and integration. The X-ray single-crystal diffraction was performed on Saturn 724+ instrument. High resolution mass spectra were obtained on an Ultima Global spectrometer with an ESI source, and mass spectra were obtained on a Bruker Microflex LRF with an ESI source. UV-vis absorption spectra were obtained on a Shimadzu UV-2600 spectrophotometer.

## II. Synthesis and Examination of New Stabilized Carbocation

### A) In situ generation of carbocation 2a-HfCl<sub>4</sub>

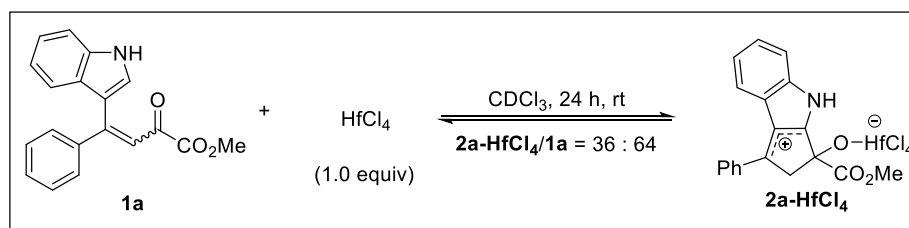

To a 10 mL Schlenk tube equipped with a magnetic stir bar was added  $\gamma$ -Indolyl  $\beta,\gamma$ -unsaturated- $\alpha$ -ketoester derivatives **1a** (0.1 mmol, 1.0 equiv) and HfCl<sub>4</sub> (0.1 mmol, 1.0 equiv). The resulting mixture was sealed and degassed via vacuum evacuation and subsequent backfill with nitrogen for three times. Then CDCl<sub>3</sub> (1.0 mL, 0.1 M) was added under nitrogen atmosphere. The reaction mixture was stirred at room temperature for 2 h. After reaction, the solution was examined by <sup>1</sup>H NMR.

### <sup>1</sup>H NMR (500 MHz, CDCl<sub>3</sub>)

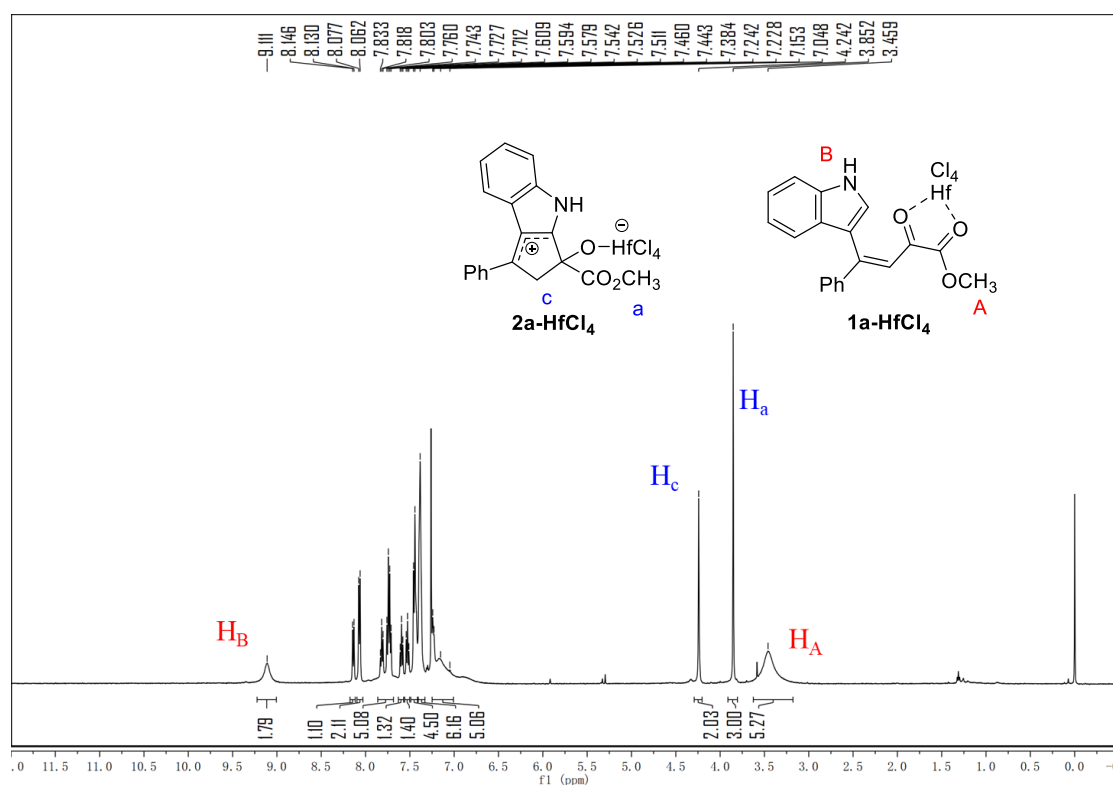

## B) In situ generation of carbocation 2a-LA(PA)

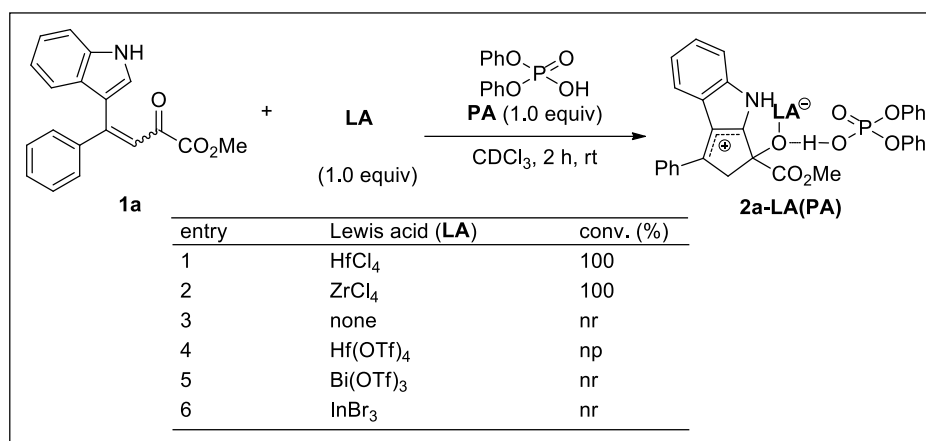

To a 10 mL Schlenk tube equipped with a magnetic stir bar was added  $\gamma$ -indolyl  $\beta,\gamma$ -unsaturated- $\alpha$ -ketoester derivatives **1a** (0.1 mmol, 1.0 equiv), Lewis acid **LA** (0.1 mmol, 1.0 equiv) and diphenyl phosphate (0.1 mmol, 1.0 equiv). The resulting mixture was sealed and degassed via vacuum evacuation and subsequent backfill with nitrogen for three times. Then CDCl<sub>3</sub> (1.0 mL, 0.1 M) was added under nitrogen atmosphere. The reaction mixture was stirred at room temperature for 2 h. Through TLC (PE/EA = 3:2, v/v) detection, it was found that no reaction occurred or no product was observed when the reaction solution was added Hf(OTf)<sub>4</sub>, Bi(OTf)<sub>3</sub> or InBr<sub>3</sub>; when the reaction solution was added HfCl<sub>4</sub> or ZrCl<sub>4</sub>, **1a** was completely consumed. The solution containing HfCl<sub>4</sub> and the solution containing ZrCl<sub>4</sub> were examined by <sup>1</sup>H NMR and <sup>13</sup>C NMR.

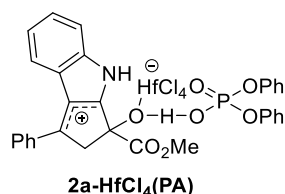

**2a-HfCl<sub>4</sub>(PA)**: <sup>1</sup>H NMR (500 MHz, CDCl<sub>3</sub>)  $\delta$  8.15 (d,  $J$  = 7.5 Hz, 1H), 8.09 (d,  $J$  = 7.5 Hz, 2H), 7.82 – 7.80 (m, 2H), 7.74 (t,  $J$  = 7.5 Hz, 2H), 7.59 (t,  $J$  = 7.5 Hz, 1H), 7.53 (t,  $J$  = 7.5 Hz, 1H), 7.19 – 6.99 (m, 9H), 6.93 (t,  $J$  = 7.0 Hz, 1H), 4.28 (s, 2H), 3.85 (s, 3H) ppm; <sup>13</sup>C NMR (126 MHz, CDCl<sub>3</sub>)  $\delta$  181.3, 178.7, 169.3, 150.02, 149.96, 147.01, 136.75, 133.6, 132.5, 131.5, 130.9, 130.2, 129.6, 129.4, 129.3, 128.2, 125.3, 125.1, 124.1, 121.2, 120.83, 120.79, 117.7, 74.4, 55.1, 54.2 ppm.



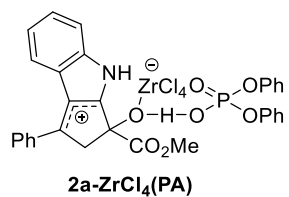

**2a-ZrCl<sub>4</sub>(PA):** <sup>1</sup>H NMR (500 MHz, CDCl<sub>3</sub>) δ 8.15 (d, *J* = 7.5 Hz, 1H), 8.09 (d, *J* = 8.0 Hz, 2H), 7.83 – 7.79 (m, 2H), 7.73 (t, *J* = 7.5 Hz, 2H), 7.59 – 7.52 (m, 2H), 7.19 – 6.91 (m, 10H), 4.34 – 4.24 (m, 2H), 3.83 (s, 3H) ppm; <sup>13</sup>C NMR (126 MHz, CDCl<sub>3</sub>) δ 181.1, 178.9, 169.4, 150.1, 150.0, 147.0, 136.9, 133.7, 132.4, 131.6, 130.9, 130.2, 129.6, 129.5, 129.4, 128.3, 125.3, 125.1, 124.2, 121.2, 120.9, 120.8, 117.7, 74.3, 55.1, 54.3 ppm.

**$^1\text{H}$  NMR (500 MHz,  $\text{CDCl}_3$ )**

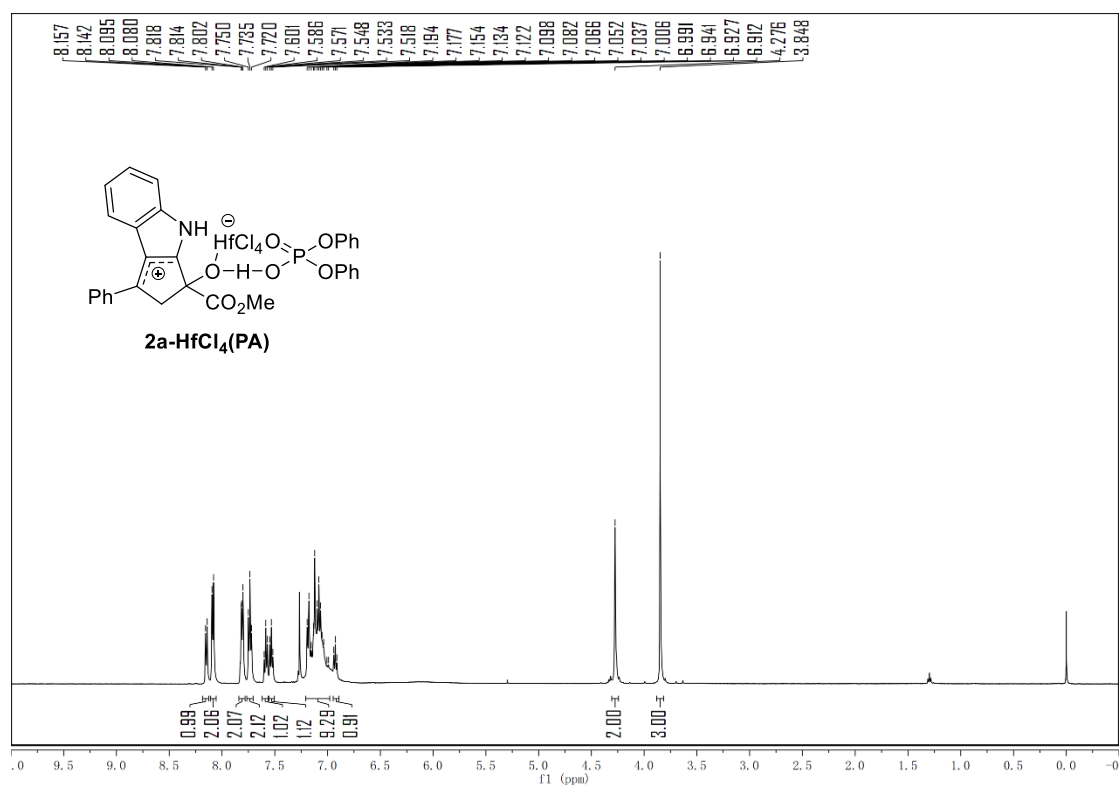

**$^{13}\text{C}$  NMR (126 MHz,  $\text{CDCl}_3$ )**

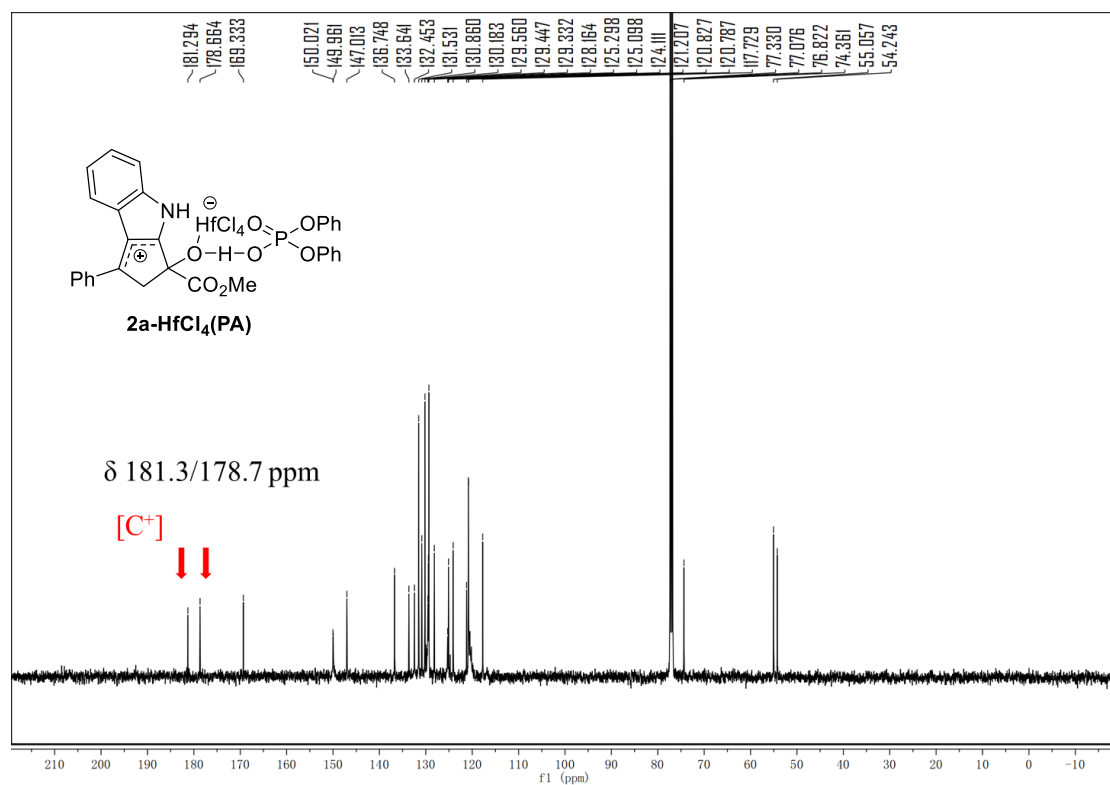

**Figure S1.  $^1\text{H}$  NMR and  $^{13}\text{C}$  NMR for 2a- $\text{HfCl}_4(\text{PA})$**

**$^1\text{H}$  NMR (500 MHz,  $\text{CDCl}_3$ )**

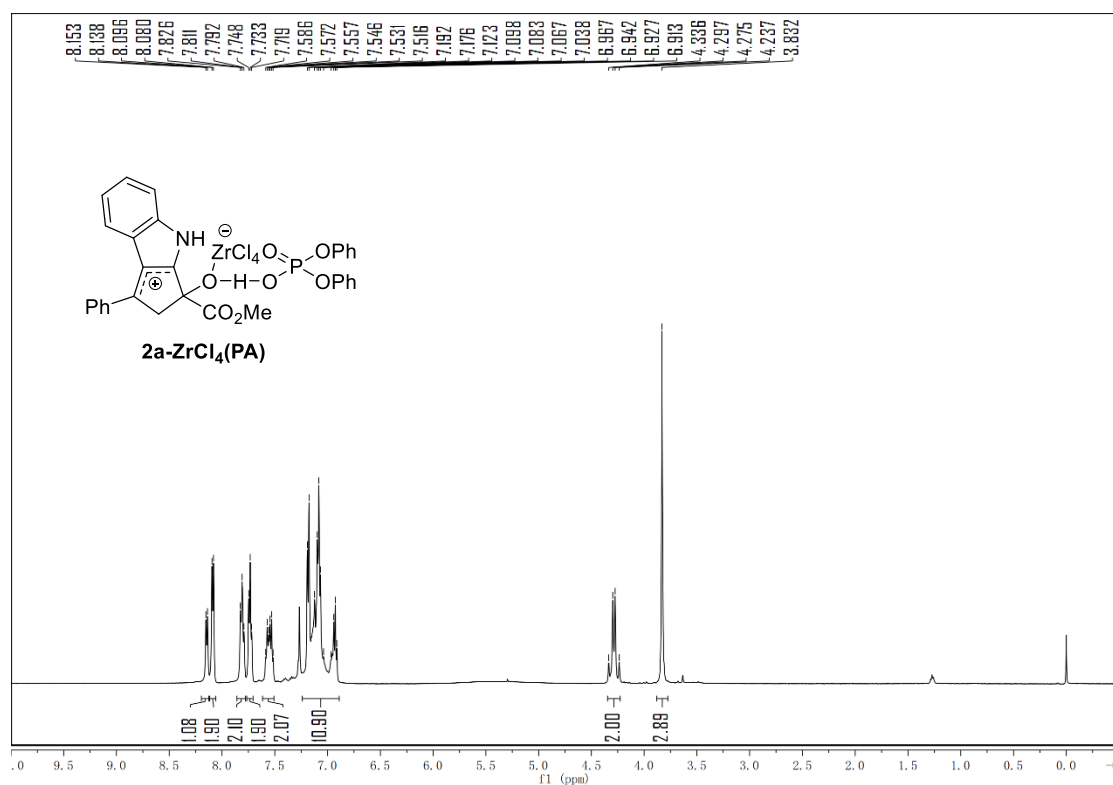

**$^{13}\text{C}$  NMR (126 MHz,  $\text{CDCl}_3$ )**

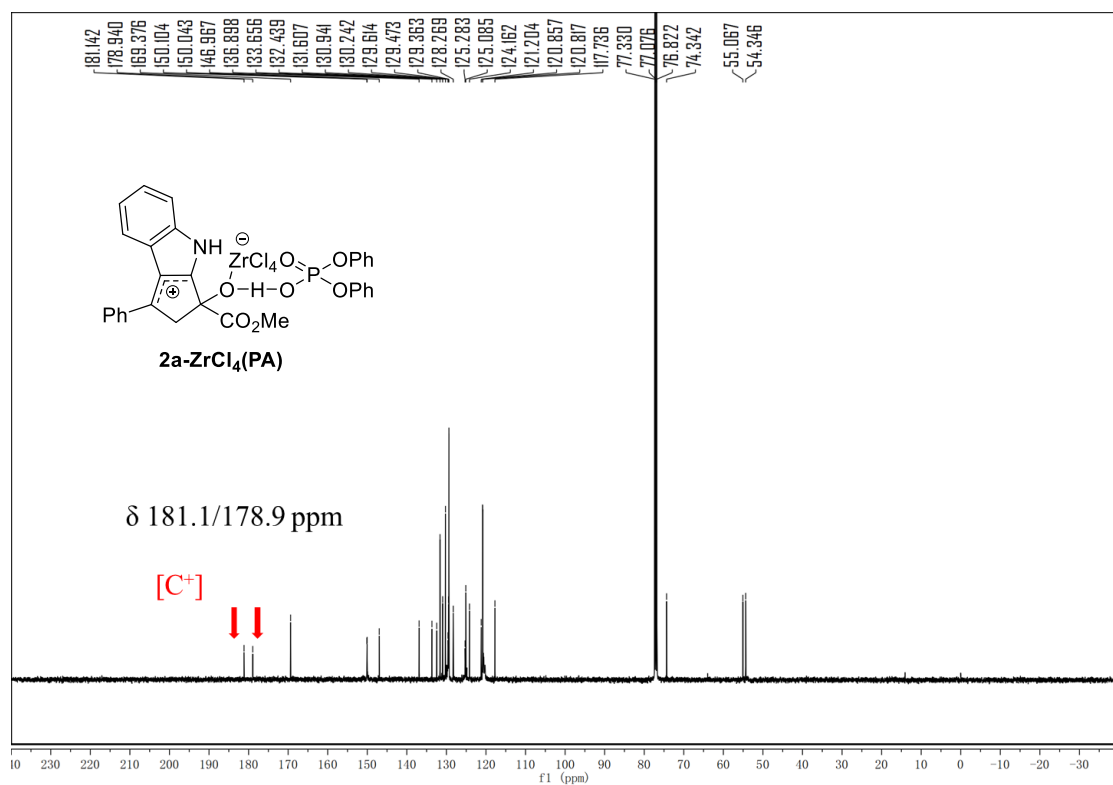

**Figure S2.  $^1\text{H}$  NMR and  $^{13}\text{C}$  NMR for 2a-ZrCl<sub>4</sub>(PA)**

**UV-vis absorption spectra:** The UV/Vis absorption spectra of **1a** (0.05 mM), PA (0.05 mM) and **2a-HfCl<sub>4</sub>(PA)** (0.05 mM) in CHCl<sub>3</sub> were recorded in 1 cm path quartz cuvettes by using the UV-2600 UV-Vis spectrophotometer, respectively.

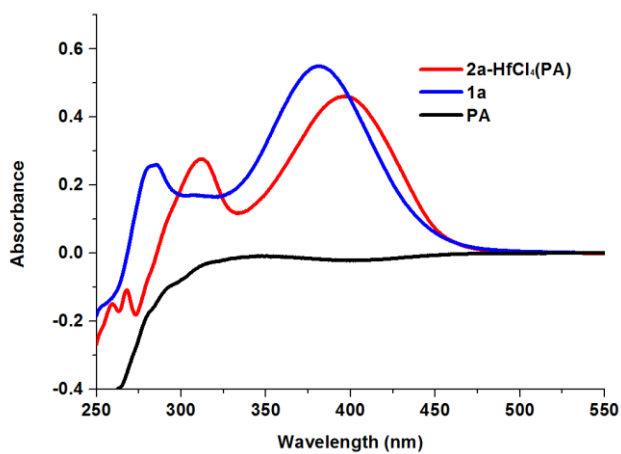

**Figure S3.** UV-vis absorption spectra of **1a**, **PA**, and **2a-HfCl<sub>4</sub>(PA)** in CHCl<sub>3</sub>

### C) Hydride Reduction of in situ Generated Carbocation 2a-HfCl<sub>4</sub>(PA) from 1a

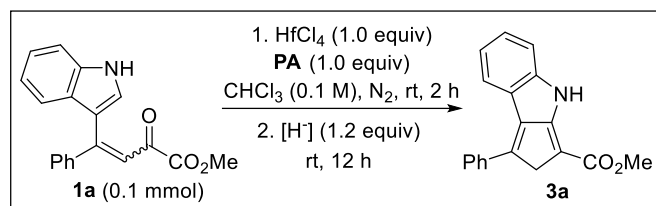

**Table S1. Hydride Reduction of in situ Generated Carbocation 2a-HfCl<sub>4</sub>(PA) from 1a<sup>a</sup>**

| entry | [H <sup>-</sup> ]     | <i>N</i> <sup>b</sup> | yield (%) <sup>c</sup> |
|-------|-----------------------|-----------------------|------------------------|
| 1     | NaBH <sub>4</sub>     | 11.72                 | 18                     |
| 2     |                       | 9.00                  | 39                     |
| 3     | Et <sub>3</sub> SiH   | 3.58                  | 37                     |
| 4     | PhMe <sub>2</sub> SiH | 3.55                  | 58                     |

<sup>a</sup> All reactions were performed on a 0.10 mmol scale (based on  $\alpha$ -keto ester **1a**) using HfCl<sub>4</sub> (0.1 mmol, 1.0 equiv) and PA (0.1 mmol, 1.0 equiv) in CHCl<sub>3</sub> (1.0 mL) under N<sub>2</sub> at room temperature for 2 h, and then different hydride [H<sup>-</sup>] (0.12 mmol, 1.2 equiv) was added and stirred at room temperature for 12 h. <sup>b</sup> Nucleophilicity parameter (*N*) was predicted in [http://pka.luozsgroup.com/ne\\_prediction](http://pka.luozsgroup.com/ne_prediction). <sup>c</sup> Isolated yield.

To a 10 mL Schlenk tube equipped with a magnetic stir bar was added  $\gamma$ -Indolyl  $\beta,\gamma$ -unsaturated- $\alpha$ -ketoester derivatives **1a** (0.1 mmol, 1.0 equiv), HfCl<sub>4</sub> (0.1 mmol, 1.0 equiv) and diphenyl phosphate (0.1 mmol, 1.0 equiv). The resulting mixture was sealed and degassed via vacuum evacuation and subsequent backfill with nitrogen for three times. Then CHCl<sub>3</sub> (1.0 mL, 0.1 M) was added under nitrogen atmosphere. The reaction mixture was stirred at room temperature for 2 h. Then different hydride compounds (0.12 mmol, 1.2 equiv) was added under nitrogen atmosphere. The reaction mixture was stirred at room temperature for other 12 h. After reaction, the mixture was concentrated under vacuum. Purification of mixture by column chromatography on silica gel (PE/EA = 4:1, v/v) to give the desired product **3a**.

### III. Optimization

**Table S2.** Screening of Different Lewis Acids <sup>a</sup>

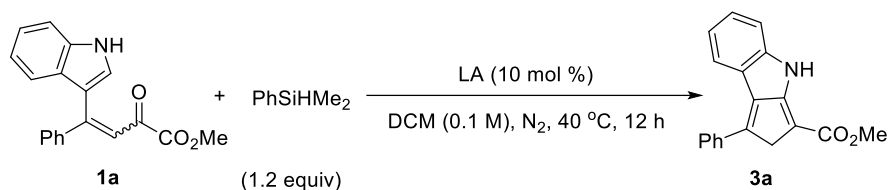

| entry | Lewis acid (LA)           | yield (%) <sup>b</sup> |
|-------|---------------------------|------------------------|
| 1     | none                      | NR                     |
| 2     | $\text{Mg}(\text{OTf})_2$ | NR                     |
| 3     | $\text{Sc}(\text{OTf})_3$ | NR                     |
| 4     | $\text{Y}(\text{OTf})_3$  | NR                     |
| 5     | $\text{ZrF}_4$            | NR                     |
| 6     | $\text{ZrCl}_4$           | 28                     |
| 7     | $\text{ZrBr}_4$           | 29                     |
| 8     | $\text{HfCl}_4$           | 39                     |
| 9     | $\text{Hf}(\text{OTf})_4$ | NR                     |
| 10    | $\text{FeBr}_3$           | NR                     |
| 11    | $\text{FeCl}_3$           | NP                     |
| 12    | $\text{Fe}(\text{OTf})_3$ | NP                     |
| 13    | $\text{Ni}(\text{OTf})_2$ | NR                     |
| 14    | $\text{Cu}(\text{OTf})_2$ | NP                     |
| 15    | $\text{Zn}(\text{OTf})_2$ | NR                     |
| 16    | $\text{InBr}_3$           | NR                     |
| 17    | $\text{In}(\text{OTf})_3$ | NR                     |
| 18    | $\text{Bi}(\text{OTf})_3$ | NR                     |
| 19    | $\text{Yb}(\text{OTf})_3$ | NR                     |

<sup>a</sup> Reaction Conditions: **1a** (0.1 mmol),  $\text{PhSiHMe}_2$  (1.2 equiv), Lewis acid (10 mol %), were added to DCM (1.0 mL) under  $\text{N}_2$  for 12 h at 40 °C. Compound **1a** as a mixture (*E/Z* = 75:25) was determined by  $^1\text{H}$  NMR. <sup>b</sup> Yields of isolated products. DCM =  $\text{CH}_2\text{Cl}_2$ , NR = No Reaction, NP = No Product.

**Table S3.** Screening of Different Brønsted acid <sup>a</sup>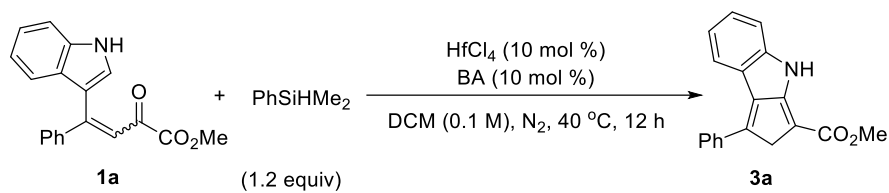

| entry | Brønsted acid (BA)      | yield (%) <sup>b</sup> |
|-------|-------------------------|------------------------|
| 1     | none                    | 39                     |
| 2     | PA                      | 90                     |
| 3     | TsOH                    | 79                     |
| 4     | TFA                     | 75                     |
| 5     | $\text{H}_3\text{PO}_4$ | 78                     |

<sup>a</sup> Reaction Conditions: **1a** (0.1 mmol),  $\text{PhSiHMe}_2$  (1.2 equiv),  $\text{HfCl}_4$  (10 mol %), Brønsted acid (10 mol %), were added to DCM (1.0 mL) under  $\text{N}_2$  for 12 h at 40 °C. Compound **1a** as a mixture (*E/Z* = 75:25) was determined by  $^1\text{H}$  NMR. <sup>b</sup> Yields of isolated products. DCM =  $\text{CH}_2\text{Cl}_2$ , PA = diphenyl phosphate, NR = No Reaction, NP = No Product.

**Table S4.** Screening of Different Solvents <sup>a</sup>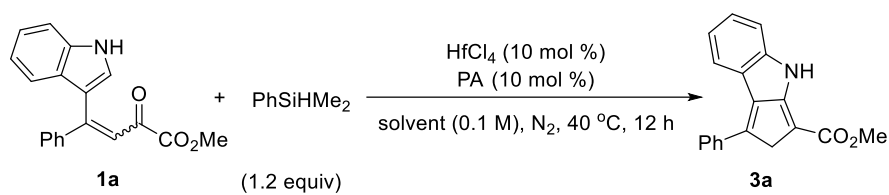

| entry | solvent                             | yield (%) <sup>b</sup> |
|-------|-------------------------------------|------------------------|
| 1     | DCM                                 | 90                     |
| 2     | $\text{ClCH}_2\text{CH}_2\text{Cl}$ | 69                     |
| 3     | $\text{CHCl}_3$                     | 70                     |
| 4     | THF                                 | 17                     |
| 5     | MeCN                                | NP                     |
| 6     | Toluene                             | 26                     |
| 7     | Acetone                             | 23                     |
| 8     | Hexane                              | NR                     |

<sup>a</sup> Reaction Conditions: **1a** (0.1 mmol),  $\text{PhSiHMe}_2$  (1.2 equiv),  $\text{HfCl}_4$  (10 mol %), PA (10 mol %), were added to solvent (1.0 mL) under  $\text{N}_2$  for 12 h at 40 °C. Compound **1a** as a mixture ( $E/Z = 75:25$ ) was determined by  $^1\text{H}$  NMR. <sup>b</sup> Yields of isolated products. DCM =  $\text{CH}_2\text{Cl}_2$ , PA = diphenyl phosphate, NR = No Reaction, NP = No Product.



**Table S5.** Screening of Different Equivalent of PhSiHMe<sub>2</sub><sup>a</sup>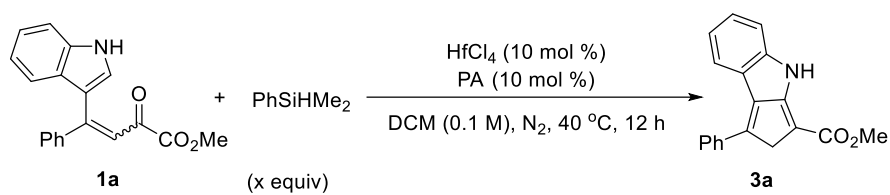

| entry | x   | yield (%) <sup>b</sup> |
|-------|-----|------------------------|
| 1     | 1.2 | 90                     |
| 2     | 1.5 | 88                     |
| 3     | 2   | 82                     |
| 4     | 3   | 79                     |

<sup>a</sup> Reaction Conditions: **1a** (0.1 mmol), PhSiHMe<sub>2</sub> (x equiv), HfCl<sub>4</sub> (10 mol %), PA (10 mol %), were added to solvent (1.0 mL) under N<sub>2</sub> for 12 h at 40 °C. Compound **1a** as a mixture (*E/Z* = 75:25) was determined by <sup>1</sup>H NMR. <sup>b</sup> Yields of isolated products. DCM = CH<sub>2</sub>Cl<sub>2</sub>, PA = diphenyl phosphate, NR = No Reaction, NP = No Product.

**Table S6.** Screening of Different Silane <sup>a</sup>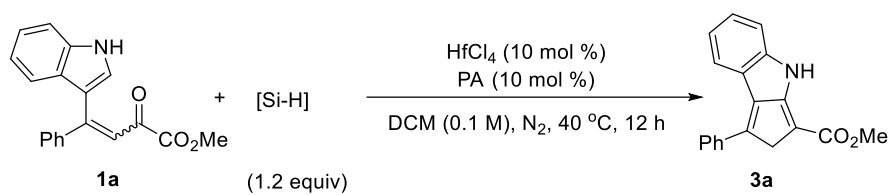

| entry | [Si-H]               | yield (%) <sup>b</sup> |
|-------|----------------------|------------------------|
| 1     | PhSiHMe <sub>2</sub> | 90                     |
| 2     | Et <sub>3</sub> SiH  | 26                     |
| 3     | TMDS                 | NP                     |

<sup>a</sup> Reaction Conditions: **1a** (0.1 mmol), [Si-H] (1.2 equiv),  $\text{HfCl}_4$  (10 mol %), PA (10 mol %), were added to solvent (1.0 mL) under  $\text{N}_2$  for 12 h at 40 °C. Compound **1a** as a mixture (*E/Z* = 75:25) was determined by <sup>1</sup>H NMR. <sup>b</sup> Yields of isolated products. DCM =  $\text{CH}_2\text{Cl}_2$ , PA = diphenyl phosphate, TMDS = 1,1,3,3 - Tetramethyldisilazane, NR = No Reaction, NP = No Product.

## IV. Experimental Procedures and Characterization Data

### A) One-pot synthesis of $\gamma$ -indolyl $\beta,\gamma$ -unsaturated $\alpha$ -keto esters

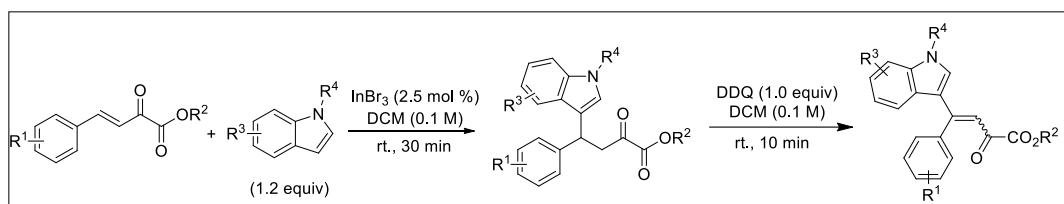

**General procedure I:**  $\gamma$ -Indolyl  $\beta,\gamma$ -unsaturated- $\alpha$ -ketoesters were prepared on slightly modified literature precedures.<sup>1</sup>  $\beta,\gamma$ -unsaturated- $\alpha$ -ketoester derivatives (4 mmol, 1.0 equiv) and indole derivatives (4.8 mmol, 1.2 equiv) were dissolved in DCM (40 mL, 0.1 M), then  $InBr_3$  (0.1 mmol, 2.5 mol %) was added. The solution was stirred at room temperature for 30 min. Subsequently, DDQ (4 mmol, 1.0 equiv) was added. The solution was stirred at room temperature for 10 minutes. After reaction, purification of mixture by column chromatography on silica gel gave the desired product.

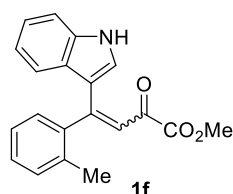

**1f:** Prepared according to the general procedure I above and obtained as yellow solid (0.64 g, 50% yield,  $E/Z > 25:1$ ), eluent: DCM/EA = 30:1;  $^1H$  NMR (500 MHz,  $DMSO-d_6$ )  $\delta$  11.99 (s, 1H), 7.50 (d,  $J = 8.0$  Hz, 1H), 7.46 (d,  $J = 7.5$  Hz, 1H), 7.36 (d,  $J = 7.5$  Hz, 1H), 7.29 – 7.21 (m, 4H), 7.18 – 7.13 (m, 2H), 7.11 (d,  $J = 7.0$  Hz, 1H), 3.42 (s, 3H), 2.05 (s, 3H) ppm;  $^{13}C$  NMR (126 MHz,  $DMSO-d_6$ )  $\delta$  184.2, 164.8, 156.9, 138.4, 138.3, 136.2, 133.0, 130.1, 129.5, 128.8, 125.8, 125.0, 123.3, 122.1, 120.6, 116.2, 115.1, 113.4, 52.4, 19.5 ppm.

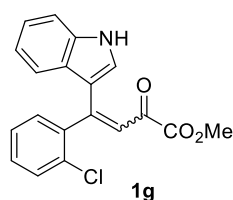

**1g:** Prepared according to the general procedure I above and obtained as yellow solid

(0.63 g, 46% yield, *E/Z* > 25:1), eluent: DCM/EA = 30:1; <sup>1</sup>H NMR (500 MHz, DMSO- d<sub>6</sub>) δ 12.05 (s, 1H), 7.62 (d, *J* = 8.0 Hz, 1H), 7.55 – 7.51 (m, 2H), 7.49 – 7.45 (m, 1H), 7.43 – 7.39 (m, 2H), 7.29 – 7.24 (m, 3H), 7.21 (t, *J* = 7.0 Hz, 1H), 3.64 (s, 3H) ppm; <sup>13</sup>C NMR (126 MHz, DMSO- d<sub>6</sub>) δ 181.3, 163.6, 152.9, 137.9, 137.7, 133.1, 131.7, 130.2, 129.6, 129.2, 126.9, 124.4, 123.0, 121.8, 120.1, 115.3, 113.7, 113.0, 52.3 ppm.

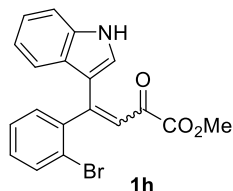

**1h:** Prepared according to the general procedure I above and obtained as yellow solid (0.75 g, 49% yield, *E/Z* > 25:1), eluent: DCM/EA = 30:1; <sup>1</sup>H NMR (500 MHz, DMSO- d<sub>6</sub>) δ 12.03 (s, 1H), 7.70 (d, *J* = 8.0 Hz, 1H), 7.62 (d, *J* = 8.0 Hz, 1H), 7.52 (d, *J* = 8.0 Hz, 1H), 7.45 (t, *J* = 7.0 Hz, 1H), 7.39 – 7.37 (m, 2H), 7.28 – 7.21 (m, 4H), 3.64(s, 3H) ppm; <sup>13</sup>C NMR (126 MHz, DMSO-d<sub>6</sub>) δ 181.1, 163.3, 154.5, 139.7, 137.9, 133.2, 132.3, 130.1, 129.7, 127.4, 124.4, 123.0, 121.8, 121.8, 120.2, 115.3, 113.3, 113.0, 52.3 ppm.

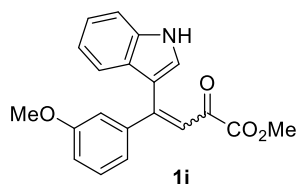

**1i:** Prepared according to the general procedure I above and obtained as yellow solid (0.60 g, 45% yield, *E/Z* = 77:23), eluent: DCM/EA = 30:1; <sup>1</sup>H NMR (500 MHz, DMSO- d<sub>6</sub>) δ 12.01 (s, 1H), 11.81 (s, 0.3H), 7.73 (d, *J* = 2.5 Hz, 0.3H), 7.58 (d, *J* = 8.0 Hz, 1H), 7.52 (d, *J* = 8.0 Hz, 1H), 7.47 (d, *J* = 8.0 Hz, 0.3H), 7.37 – 7.32 (m, 2.2H), 7.24 (t, *J* = 7.0 Hz, 1H), 7.19 – 7.13 (m, 1.3H), 7.09 – 7.01 (m, 3H), 6.93 (t, *J* = 7.5 Hz, 0.3H), 6.86 – 6.84 (m, 2H), 6.75 (d, *J* = 8.0 Hz, 0.3H), 6.69 (s, 0.3H), 3.76 (s, 3H), 3.74 (s, 0.9H), 3.45 (s, 3H), 3.12 (s, 0.9H) ppm; <sup>13</sup>C NMR (126 MHz, DMSO- d<sub>6</sub>) δ 185.3, 184.2, 164.6, 164.3, 159.8, 159.2, 157.0, 154.9, 141.3, 140.3, 138.2, 137.4, 133.6, 132.9, 130.1, 129.6, 126.5, 125.2, 123.3, 122.8, 122.4, 122.0, 120.9, 120.74, 120.66, 116.8, 116.5, 115.6, 115.4, 115.0, 114.7, 113.4, 112.6, 55.7, 55.6, 52.4, 52.1 ppm.

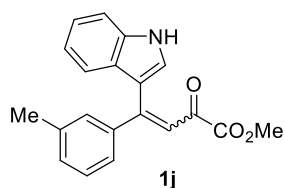

**1j:** Prepared according to the general procedure I above and obtained as yellow solid (0.38 g, 30% yield, *E/Z* = 77:23), eluent: DCM/EA = 30:1; <sup>1</sup>H NMR (500 MHz, DMSO- *d*<sub>6</sub>) δ 12.00 (s, 1H), 11.81 (s, 0.3H), 7.73 (s, 0.3H), 7.55 (d, *J* = 8.0 Hz, 1H), 7.51 (d, *J* = 8.0 Hz, 1H), 7.47 (d, *J* = 8.0 Hz, 0.3H), 7.34 – 7.29 (m, 3.9H), 7.23 (t, *J* = 8.0 Hz, 1.3H), 7.18 – 7.13 (m, 1.3H), 7.12 – 7.07 (m, 2H), 6.99 (s, 1H), 6.91 (t, *J* = 7.5 Hz, 0.3H), 6.71 (d, *J* = 8.0 Hz, 0.3H), 6.64 (s, 0.3H), 3.41 (s, 3H), 3.12 (s, 0.9H), 2.34 (s, 3H), 2.31 (s, 0.9H) ppm; <sup>13</sup>C NMR (126 MHz, DMSO- *d*<sub>6</sub>) δ 184.7, 184.0, 164.2, 163.9, 157.0, 155.0, 139.4, 138.4, 137.8, 137.7, 137.0, 136.9, 133.0, 132.4, 131.2, 130.2, 129.6, 129.3, 128.4, 127.8, 126.8, 126.4, 126.0, 124.7, 122.8, 122.3, 121.4, 120.2, 120.1, 120.0, 116.5, 115.0, 113.0, 112.8, 112.1, 51.8, 51.6, 20.9 ppm.

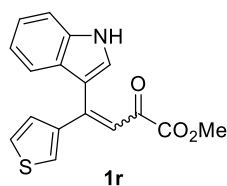

**1r:** Prepared according to the general procedure I above and obtained as yellow solid (0.57 g, 46% yield, *E/Z* = 63:37), eluent: DCM/EA = 30:1; <sup>1</sup>H NMR (500 MHz, DMSO- *d*<sub>6</sub>) δ 12.00 (s, 1H), 11.74 (s, 0.6H), 7.712 – 7.707 (m, 0.6H), 7.66 – 7.62 (m, 3.2H), 7.54 – 7.51 (m, 2H), 7.47 (d, *J* = 8.0 Hz, 0.6H), 7.44 (d, *J* = 3.0 Hz, 1H), 7.35 (dd, *J* = 1.0, 5.0 Hz, 0.6H), 7.23 (t, *J* = 7.0 Hz, 1H), 7.16 (t, *J* = 7.5 Hz, 1.6H), 7.07 (dd, *J* = 1.0, 5.0 Hz, 1H), 7.00 – 6.96 (m, 1.2H), 6.94 (s, 1H), 6.76 (s, 0.6H), 3.50 (s, 3H), 3.07 (s, 1.8H) ppm; <sup>13</sup>C NMR (126 MHz, DMSO- *d*<sub>6</sub>) δ 185.8, 184.5, 164.6, 164.4, 151.5, 148.9, 142.0, 139.4, 138.2, 137.3, 133.0, 131.9, 130.0, 129.9, 128.8, 127.9, 127.8, 126.53, 126.48, 125.3, 123.3, 122.7, 121.9, 120.63, 120.55, 120.5, 119.7, 116.6, 116.3, 113.4, 113.3, 112.6, 52.5, 52.0 ppm.

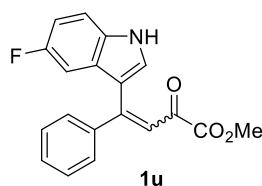

**1u:** Prepared according to the general procedure I above and obtained as yellow solid (0.68 g, 53% yield, *E/Z* = 76:24), eluent: DCM/EA = 30:1;  $^1\text{H}$  NMR (500 MHz, DMSO-  $d_6$ )  $\delta$  12.10 (s, 1H), 11.94 (s, 0.32H), 7.84 (s, 0.32H), 7.54 – 7.49 (m, 2.32H), 7.48 – 7.43 (m, 4.60H), 7.28 (d, *J* = 7.0 Hz, 2H), 7.09 – 7.05 (m, 1H), 7.03 – 6.99 (m, 1.32H), 6.98 (s, 1H), 6.70 (s, 0.32H), 6.31 – 6.29 (m, 0.32H), 3.44 (s, 3H), 3.24 (s, 0.96H) ppm;  $^{13}\text{C}$  NMR (126 MHz, DMSO-  $d_6$ )  $\delta$  184.0, 183.6, 164.1, 163.7, 158.1 (d,  $^1J_{\text{C-F}}$  = 236.1 Hz), 157.2 (d,  $^1J_{\text{C-F}}$  = 234.2 Hz), 156.3, 154.1, 139.4, 138.2, 134.2, 134.1, 134.0, 133.5, 130.6, 129.5, 129.0, 128.9, 128.7, 128.0, 126.5 (d,  $^3J_{\text{C-F}}$  = 10.3 Hz), 125.2 (d,  $^3J_{\text{C-F}}$  = 10.3 Hz), 119.8, 116.5 (d,  $^4J_{\text{C-F}}$  = 4.4 Hz), 115.0, 114.0 (d,  $^3J_{\text{C-F}}$  = 9.8 Hz), 113.4 (d,  $^3J_{\text{C-F}}$  = 9.4 Hz), 112.9 (d,  $^4J_{\text{C-F}}$  = 4.5 Hz), 110.8 (d,  $^3J_{\text{C-F}}$  = 25.9 Hz), 110.5 (d,  $^2J_{\text{C-F}}$  = 25.9 Hz), 105.2 (d,  $^2J_{\text{C-F}}$  = 24.8 Hz), 104.9 (d,  $^2J_{\text{C-F}}$  = 24.0 Hz), 52.0, 51.8 ppm;  $^{19}\text{F}$  NMR (376 MHz, DMSO-  $d_6$ )  $\delta$  -121.5, -123.0 ppm.

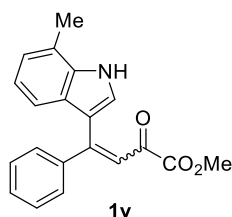

**1v:** Prepared according to the general procedure I above and obtained as yellow solid (0.64 g, 50% yield, *E/Z* = 76:24), eluent: DCM/EA = 30:1;  $^1\text{H}$  NMR (500 MHz, DMSO-  $d_6$ )  $\delta$  11.98 (s, 1H), 11.79 (s, 0.31H), 7.71 (s, 0.31H), 7.47 – 7.40 (m, 4.55H), 7.31 (d, *J* = 7.5 Hz, 1H), 7.26 (d, *J* = 7.5 Hz, 2H), 7.20 (s, 1H), 7.05 – 7.02 (s, 3H), 6.91 (d, *J* = 6.5 Hz, 0.31H), 6.78 (t, *J* = 7.0 Hz, 0.31H), 6.63 (s, 0.31H), 6.48 (d, *J* = 8.0 Hz, 0.31H), 3.41 (s, 3H), 3.12 (s, 0.94H), 2.46 (s, 3.94H) ppm;  $^{13}\text{C}$  NMR (126 MHz, DMSO-  $d_6$ )  $\delta$  184.2, 183.1, 163.7, 163.3, 156.4, 154.5, 138.9, 138.0, 136.6, 135.9, 132.0, 129.9, 129.0, 128.5, 128.4, 128.1, 127.4, 125.3, 124.1, 122.9, 122.2, 121.6, 121.1, 120.9, 119.8, 119.6, 117.2, 116.6, 114.4, 112.7, 51.4, 51.2, 16.1 ppm.

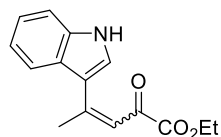

**1w**

**1w:** Prepared according to the general procedure I above and obtained as yellow solid (0.10 g, 10% yield, *E/Z* > 25:1), eluent: DCM/EA = 2:1;  $^1\text{H}$  NMR (500 MHz, DMSO-  $d_6$ )  $\delta$  12.06 (s, 1H), 8.16 (d, *J* = 3.0 Hz, 1H), 7.96 – 7.94 (m, 1H), 7.51 (t, *J* = 4.5 Hz, 1H), 7.39 (s, 1H), 7.26 – 7.22 (m, 2H), 4.27 (q, *J* = 7.0 Hz, 2H), 1.31 (t, *J* = 7.0 Hz, 3H) ppm;  $^{13}\text{C}$  NMR (126 MHz, DMSO-  $d_6$ )  $\delta$  181.2, 163.3, 157.1, 137.8, 132.1, 124.2, 123.0, 121.6, 120.4, 117.2, 112.8, 112.6, 61.5, 18.8, 13.9 ppm.

## B) Catalytic Reductive Nazarov Cyclization of $\gamma$ -Indolyl $\beta,\gamma$ -unsaturated- $\alpha$ -Keto Esters

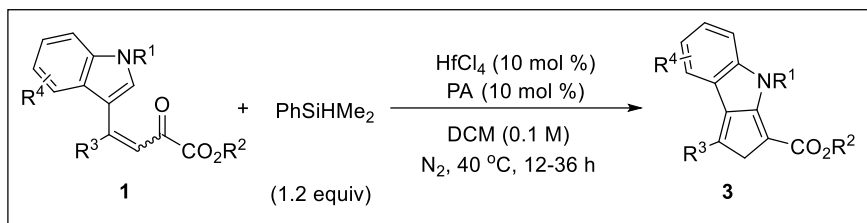

**General procedure II:** To a 10 mL Schlenk tube equipped with a magnetic stir bar was added  $\gamma$ -indolyl  $\beta,\gamma$ -unsaturated- $\alpha$ -ketoester derivatives **1** (0.15 mmol, 1.0 equiv),  $\text{HfCl}_4$  (0.015 mmol, 10 mol %) and diphenyl phosphate (0.015 mmol, 10 mol %). The resulting mixture was sealed and degassed via vacuum evacuation and subsequent backfill with nitrogen for three times. Then anhydrous DCM (1.5 mL, 0.1 M) and  $\text{PhSiHMe}_2$  (0.18 mmol, 1.2 equiv) was added under nitrogen atmosphere. The reaction mixture was stirred at 40 °C for 12-36 h. After reaction, the mixture was concentrated under vacuum. Purification of mixture by column chromatography on silica gel (PE/EA = 4:1, v/v) to give the desired product **3**.

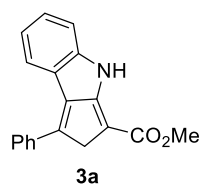

**3a:** Prepared according to the general procedure II above and obtained as yellow solid (39.0 mg, 90% yield, M.P. = 230 - 233 °C), eluent: PE/EA = 4:1;  $^1\text{H}$  NMR (500 MHz,  $\text{DMSO-d}_6$ )  $\delta$  10.50 (s, 1H), 7.88 (d,  $J$  = 7.5 Hz, 1H), 7.81 (d,  $J$  = 8.0 Hz, 2H), 7.51 (t,  $J$  = 7.5 Hz, 2H), 7.39 (t,  $J$  = 7.0 Hz, 1H), 7.33 (t,  $J$  = 8.0 Hz, 1H), 7.20 (d,  $J$  = 7.5 Hz, 1H), 7.00 (t,  $J$  = 7.5 Hz, 1H), 3.95 (s, 2H), 3.72 (s, 3H) ppm;  $^{13}\text{C}$  NMR (126 MHz,  $\text{DMSO-d}_6$ )  $\delta$  163.9, 157.5, 152.0, 142.1, 136.1, 135.3, 129.3, 129.0, 128.4, 127.5, 122.8, 120.3, 119.7, 111.5, 93.9, 50.2, 44.9 ppm; HRMS (ESI, quadrupole)  $m/z$  ( $\text{M}+\text{H}$ ) $^+$  calcd. for  $\text{C}_{19}\text{H}_{16}\text{NO}_2$  290.1181, found 290.1180.

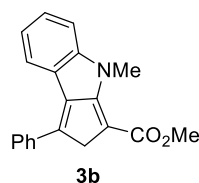



**3b:** Prepared according to the general procedure II above and obtained as yellow solid (22.3 mg, 49% yield, M.P. = 212 - 215 °C), eluent: PE/EA = 6:1; <sup>1</sup>H NMR (500 MHz, DMSO-d<sub>6</sub>) δ 7.89 (d, *J* = 7.5 Hz, 1H), 7.80 (d, *J* = 7.5 Hz, 2H), 7.53 (t, *J* = 7.5 Hz, 2H), 7.44 – 7.40 (m, 2H), 7.21 (d, *J* = 8.0 Hz, 1H), 7.07 (t, *J* = 7.5 Hz, 1H), 4.02 (s, 2H), 3.91 (s, 3H), 3.70 (s, 3H) ppm; <sup>13</sup>C NMR (126 MHz, CDCl<sub>3</sub>) δ 164.8, 158.1, 153.2, 141.9, 136.9, 135.9, 129.0, 128.8, 128.3, 127.7, 122.6, 121.0, 120.5, 108.8, 94.7, 50.6, 47.4, 31.8 ppm; HRMS (ESI, quadrupole) *m/z* (M+H)<sup>+</sup> calcd. for C<sub>20</sub>H<sub>18</sub>NO<sub>2</sub> 304.1338, found 304.1330.

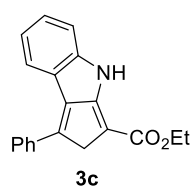

**3c:** Prepared according to the general procedure II above and obtained as yellow solid (33.7 mg, 74% yield, M.P. = 200 - 203 °C), eluent: PE/EA = 4:1; <sup>1</sup>H NMR (500 MHz, DMSO-d<sub>6</sub>) δ 10.40 (s, 1H), 7.88 (d, *J* = 7.5 Hz, 1H), 7.81 (d, *J* = 7.5 Hz, 2H), 7.52 (t, *J* = 8.0 Hz, 2H), 7.39 (t, *J* = 7.5 Hz, 1H), 7.33 (t, *J* = 7.5 Hz, 1H), 7.22 (d, *J* = 8.0 Hz, 1H), 7.01 (t, *J* = 7.5 Hz, 1H), 4.20 (q, *J* = 7.0 Hz, 2H), 3.95 (s, 2H), 1.30 (t, *J* = 7.0 Hz, 3H) ppm; <sup>13</sup>C NMR (126 MHz, DMSO-d<sub>6</sub>) δ 163.2, 157.3, 152.1, 141.8, 136.1, 135.4, 129.3, 129.0, 128.3, 127.5, 122.7, 120.2, 119.8, 111.6, 94.3, 58.4, 44.9, 14.8 ppm; HRMS (ESI, quadrupole) *m/z* (M+Na)<sup>+</sup> calcd. for C<sub>20</sub>H<sub>17</sub>NNaO<sub>2</sub> 326.1157, found 326.1160.

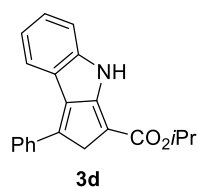

**3d:** Prepared according to the general procedure II above and obtained as yellow solid (36.1 mg, 76% yield, M.P. = 171 - 174 °C), eluent: PE/EA = 4:1; <sup>1</sup>H NMR (500 MHz, DMSO-d<sub>6</sub>) δ 10.26 (s, 1H), 7.88 (d, *J* = 7.5 Hz, 1H), 7.81 (d, *J* = 8.0 Hz, 2H), 7.51 (t, *J* = 7.5 Hz, 2H), 7.38 (t, *J* = 7.0 Hz, 1H), 7.33 (t, *J* = 7.5 Hz, 1H), 7.24 (d, *J* = 8.0 Hz, 1H), 7.00 (t, *J* = 7.5 Hz, 1H), 5.08 – 5.03 (m, 1H), 3.93 (s, 2H), 1.31 (d, *J* = 6.0 Hz, 6H) ppm; <sup>13</sup>C NMR (126 MHz, DMSO-d<sub>6</sub>) δ 163.3, 157.1, 152.0, 141.6, 136.1, 135.4, 129.3, 128.9, 128.3, 127.5, 122.7, 120.2, 119.7, 111.6, 94.8, 65.3, 45.0, 22.1 ppm; HRMS (ESI, quadrupole) *m/z* (M+Na)<sup>+</sup> calcd for C<sub>21</sub>H<sub>19</sub>NNaO<sub>2</sub> 340.1313, found 340.1306.

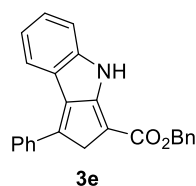

**3e:** Prepared according to the general procedure II above and obtained as yellow solid (40.6 mg, 74% yield, M.P. = 195 - 197 °C), eluent: PE/EA = 4:1; <sup>1</sup>H NMR (500 MHz, DMSO-d<sub>6</sub>) δ 10.59 (s, 1H), 7.89 (d, *J* = 8.0 Hz, 1H), 7.82 (d, *J* = 7.5 Hz, 2H), 7.52 (t, *J* = 7.5 Hz, 2H), 7.45 (d, *J* = 7.5 Hz, 2H), 7.41 – 7.35 (m, 3H), 7.34 – 7.29 (m, 2H), 7.22 (d, *J* = 8.0 Hz, 1H), 7.01 (t, *J* = 7.5 Hz, 1H), 5.27 (s, 2H), 4.00 (s, 2H) ppm; <sup>13</sup>C NMR (126 MHz, DMSO-d<sub>6</sub>) δ 163.3, 158.0, 152.0, 142.4, 137.8, 136.1, 135.3, 129.3, 129.0, 128.4, 128.3, 127.6, 127.5, 127.4, 122.8, 120.4, 119.8, 111.6, 93.7, 63.7, 44.9 ppm; HRMS (ESI, quadrupole) *m/z* (M+H)<sup>+</sup> calcd. for C<sub>25</sub>H<sub>20</sub>NO<sub>2</sub> 366.1494, found 366.1489.

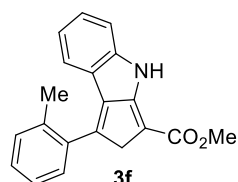

**3f:** Prepared according to the general procedure II above and obtained as brown solid (36.4 mg, 80% yield, M.P. = 118 – 120 °C), eluent: PE/EA = 6:1; <sup>1</sup>H NMR (500 MHz, CDCl<sub>3</sub>) δ 7.83 (br, 1H), 7.41 (d, *J* = 7.0 Hz, 1H), 7.31 – 7.25 (m, 5H), 7.05 (d, *J* = 8.0 Hz, 1H), 6.93 (t, *J* = 7.5 Hz, 1H), 3.92 (s, 2H), 3.84 (s, 3H), 2.38 (s, 3H) ppm; <sup>13</sup>C NMR (126 MHz, CDCl<sub>3</sub>) δ 165.4, 157.8, 150.9, 142.8, 138.2, 136.0, 135.8, 130.8, 129.2, 129.0, 128.2, 125.8, 123.5, 121.0, 120.9, 110.7, 95.2, 50.8, 47.7, 20.5 ppm; HRMS (ESI, quadrupole) *m/z* (M+H)<sup>+</sup> calcd. for C<sub>20</sub>H<sub>18</sub>NO<sub>2</sub> 304.1338, found 304.1341.

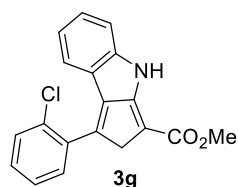

**3g:** Prepared according to the general procedure II above and obtained as brown solid (25.7 mg, 53% yield, M.P. = 125 - 127 °C), eluent: PE/EA = 6:1; <sup>1</sup>H NMR (500 MHz, CDCl<sub>3</sub>) δ 7.83 (br, 1H), 7.57 – 7.55 (m, 1H), 7.52 – 7.51 (m, 1H), 7.43 (d, *J* = 7.5 Hz, 1H), 7.36 – 7.28 (m, 3H), 7.06 (d, *J* = 8.0 Hz, 1H), 6.95 (t, *J* = 7.5 Hz, 1H), 4.05 (s, 2H), 3.84 (s,

3H) ppm;  $^{13}\text{C}$  NMR (126 MHz,  $\text{CDCl}_3$ )  $\delta$  163.3, 155.4, 149.0, 137.4, 136.9, 133.0, 130.7, 128.8, 128.4, 127.32, 127.27, 124.7, 122.2, 118.8, 118.7, 108.7, 94.2, 48.8, 45.0 ppm; HRMS (ESI, quadrupole)  $m/z$  ( $\text{M}+\text{Na}$ ) $^+$  calcd. for  $\text{C}_{19}\text{H}_{14}\text{ClNNaO}_2$  346.0611, found 346.0605.

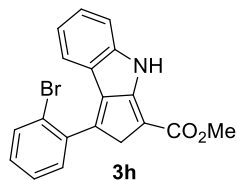

**3h:** Prepared according to the general procedure II above and obtained as yellow solid (36.5 mg, 66% yield, M.P. = 127 - 131 °C), eluent: PE/EA = 5:1;  $^1\text{H}$  NMR (500 MHz,  $\text{DMSO-d}_6$ )  $\delta$  10.52 (s, 1H), 7.78 (d,  $J$  = 8.0 Hz, 1H), 7.64 (d,  $J$  = 7.5 Hz, 1H), 7.49 (t,  $J$  = 7.5 Hz, 1H), 7.36 (t,  $J$  = 7.5 Hz, 1H), 7.29 (t,  $J$  = 8.0 Hz, 1H), 7.20 – 7.16 (m, 2H), 6.91 (t,  $J$  = 7.5 Hz, 1H), 3.94 (s, 2H), 3.73 (s, 3H) ppm;  $^{13}\text{C}$  NMR (126 MHz,  $\text{DMSO-d}_6$ )  $\delta$  164.4, 156.8, 152.6, 139.9, 139.6, 137.1, 133.7, 131.6, 130.5, 129.9, 128.2, 124.0, 122.1, 120.7, 120.1, 111.9, 95.3, 50.8, 47.5 ppm; HRMS (ESI, quadrupole)  $m/z$  ( $\text{M}+\text{H}$ ) $^+$  for  $\text{C}_{19}\text{H}_{15}\text{BrNO}_2$  368.0286, found 368.0287.

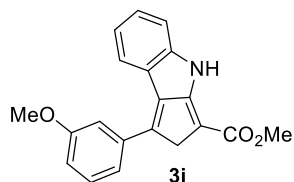

**3i:** Prepared according to the general procedure II above and obtained as yellow solid (32.1 mg, 67% yield, M.P. = 181- 183 °C), eluent: PE/EA = 4:1;  $^1\text{H}$  NMR (500 MHz,  $\text{DMSO-d}_6$ )  $\delta$  10.49 (s, 1H), 7.87 (d,  $J$  = 7.5 Hz, 1H), 7.45 – 7.39 (m, 2H), 7.34 – 7.31 (m, 2H), 7.20 (d,  $J$  = 8.0 Hz, 1H), 7.01 (t,  $J$  = 7.5 Hz, 1H), 6.97 (d,  $J$  = 8.0 Hz, 1H), 3.95 (s, 2H), 3.84 (s, 3H), 3.72 (s, 3H) ppm;  $^{13}\text{C}$  NMR (126 MHz,  $\text{DMSO-d}_6$ )  $\delta$  163.9, 159.6, 157.4, 152.1, 142.0, 136.7, 136.2, 130.0, 129.3, 122.7, 120.3, 120.0, 119.7, 114.3, 112.6, 111.6, 94.0, 55.2, 50.2, 45.0 ppm; HRMS (ESI, quadrupole)  $m/z$  ( $\text{M}+\text{H}$ ) $^+$  calcd. for  $\text{C}_{20}\text{H}_{18}\text{NO}_3$  320.1287, found 320.1285.

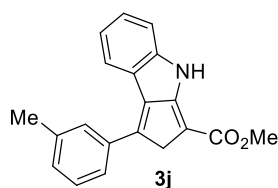

**3j:** Prepared according to the general procedure II above and obtained as yellow solid (31.8 mg, 70% yield, M.P. = 192 - 195 °C), eluent: PE/EA = 4:1; <sup>1</sup>H NMR (500 MHz, DMSO-d<sub>6</sub>) δ 10.50 (s, 1H), 7.86 (d, *J* = 8.0 Hz, 1H), 7.61 (d, *J* = 5.5 Hz, 2H), 7.40 (t, *J* = 7.5 Hz, 1H), 7.32 (t, *J* = 7.5 Hz, 1H), 7.20 (d, *J* = 8.0 Hz, 2H), 7.00 (t, *J* = 7.5 Hz, 1H), 3.93 (s, 2H), 3.72 (s, 3H), 2.39 (s, 3H) ppm; <sup>13</sup>C NMR (126 MHz, DMSO-d<sub>6</sub>) δ 163.7, 157.2, 151.7, 142.0, 137.9, 135.7, 135.0, 129.0, 128.8, 128.6, 127.8, 124.4, 122.4, 120.0, 119.6, 111.3, 93.5, 49.9, 44.6, 20.7 ppm; HRMS (ESI, quadrupole) *m/z* (M+H)<sup>+</sup> calcd. for C<sub>20</sub>H<sub>18</sub>NO<sub>2</sub> 304.1340, found 304.1339.

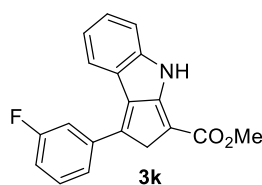

**3k:** Prepared according to the general procedure II above and obtained as yellow solid (26.7 mg, 58% yield, M.P. = 207 - 212 °C), eluent: PE/EA = 4:1; <sup>1</sup>H NMR (500 MHz, DMSO-d<sub>6</sub>) δ 10.53 (s, 1H), 7.85 (d, *J* = 7.5 Hz, 1H), 7.67 (d, *J* = 7.5 Hz, 1H), 7.57 – 7.54 (m, 2H), 7.34 (t, *J* = 8.0 Hz, 1H), 7.23 – 7.20 (m, 2H), 7.01 (t, *J* = 7.5 Hz, 1H), 3.96 (s, 2H), 3.72 (s, 3H) ppm; <sup>13</sup>C NMR (126 MHz, DMSO-d<sub>6</sub>) δ 163.6, 162.2 (d, <sup>1</sup>*J*<sub>C-F</sub> = 244.4 Hz), 156.8, 152.0, 139.9, 137.4 (d, <sup>3</sup>*J*<sub>C-F</sub> = 8.2 Hz), 136.7, 130.6 (d, <sup>3</sup>*J*<sub>C-F</sub> = 8.7 Hz), 129.4, 123.4, 122.6, 120.0, 119.1, 114.7 (d, <sup>2</sup>*J*<sub>C-F</sub> = 23.8 Hz), 113.7 (d, <sup>2</sup>*J*<sub>C-F</sub> = 22.2 Hz), 111.4, 94.4, 50.0, 44.7 ppm; <sup>19</sup>F NMR (376 MHz, DMSO-d<sub>6</sub>) δ -112.4 ppm; HRMS (ESI, quadrupole) *m/z* (M+Na)<sup>+</sup> calcd. for C<sub>19</sub>H<sub>14</sub>FNNaO<sub>2</sub> 330.0906, found 330.0911.

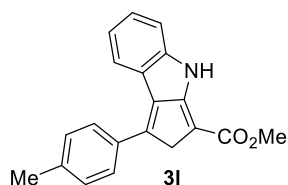

**3l:** Prepared according to the general procedure II above and obtained as yellow solid (25.0 mg, 55% yield, M.P. = 215 - 220 °C), eluent: PE/EA = 4:1; <sup>1</sup>H NMR (500 MHz,

DMSO-d<sub>6</sub>)  $\delta$  10.47 (s, 1H), 7.86 (d,  $J$  = 7.5 Hz, 1H), 7.70 (d,  $J$  = 8.0 Hz, 2H), 7.33 – 7.30 (m, 3H), 7.20 (d,  $J$  = 8.0 Hz, 1H), 7.00 (t,  $J$  = 7.5 Hz, 1H), 3.92 (s, 2H), 3.71 (s, 3H), 2.36 (s, 3H) ppm; <sup>13</sup>C NMR (126 MHz, DMSO-d<sub>6</sub>)  $\delta$  169.8, 163.5, 157.8, 148.2, 143.9, 141.3, 138.4, 135.4, 135.0, 133.3, 128.5, 126.1, 125.7, 117.3, 99.2, 56.0, 50.7, 26.8 ppm; HRMS (ESI, quadrupole)  $m/z$  (M+H)<sup>+</sup> calcd. for C<sub>20</sub>H<sub>18</sub>NO<sub>2</sub> 304.1338, found 304.1332.

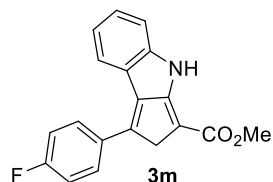

**3m**: Prepared according to the general procedure II above and obtained as yellow solid (31.3 mg, 68% yield, M.P. = 222 - 225 °C), eluent: PE/EA = 4:1; <sup>1</sup>H NMR (500 MHz, DMSO-d<sub>6</sub>)  $\delta$  10.50 (s, 1H), 7.85 – 7.83 (m, 3H), 7.36 – 7.31 (m, 3H), 7.20 (d,  $J$  = 8.0 Hz, 1H), 6.99 (t,  $J$  = 7.5 Hz, 1H), 3.93 (s, 2H), 3.71 (s, 3H) ppm; <sup>13</sup>C NMR (126 MHz, DMSO-d<sub>6</sub>)  $\delta$  163.6, 161.3 (d, <sup>1</sup> $J_{C-F}$  = 247.2 Hz), 157.1, 151.8, 140.5, 135.6, 131.7 (d, <sup>4</sup> $J_{C-F}$  = 3.0 Hz), 129.4 (d, <sup>3</sup> $J_{C-F}$  = 8.3 Hz), 129.1, 122.4, 120.0, 119.4, 115.7 (d, <sup>2</sup> $J_{C-F}$  = 21.7 Hz), 111.3, 93.6, 49.9, 44.8 ppm; <sup>19</sup>F NMR (376 MHz, DMSO-d<sub>6</sub>)  $\delta$  -112.5 ppm; HRMS (ESI, quadrupole)  $m/z$  (M+Na)<sup>+</sup> calcd. for C<sub>19</sub>H<sub>14</sub>FNNaO<sub>2</sub> 330.0906, found 330.0904.

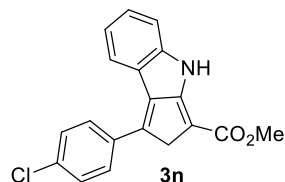

**3n**: Prepared according to the general procedure II above and obtained as yellow solid (40.3 mg, 83% yield, M.P. = 233 - 238 °C), eluent: PE/EA = 4:1; <sup>1</sup>H NMR (500 MHz, DMSO-d<sub>6</sub>)  $\delta$  10.50 (s, 1H), 7.86 – 7.81 (m, 3H), 7.56 – 7.55 (m, 2H), 7.33 (s, 1H), 7.20 (d,  $J$  = 6.0 Hz, 1H), 7.00 (s, 1H), 3.94 (s, 2H), 3.72 (s, 3H) ppm; <sup>13</sup>C NMR (126 MHz, DMSO-d<sub>6</sub>)  $\delta$  163.9, 157.2, 152.1, 140.3, 136.6, 134.2, 132.7, 129.5, 129.2, 129.0, 122.9, 120.2, 119.5, 111.6, 94.4, 50.2, 44.9 ppm; HRMS (ESI, quadrupole)  $m/z$  (M+Na)<sup>+</sup> calcd. for C<sub>19</sub>H<sub>14</sub>ClNNaO<sub>2</sub> 346.0611, found 346.0612.

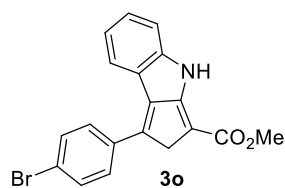

**3o:** Prepared according to the general procedure II above and obtained as yellow solid (29.8 mg, 54% yield, M.P. = 247 - 255 °C), eluent: PE/EA = 4:1; <sup>1</sup>H NMR (500 MHz, DMSO-d<sub>6</sub>) δ 10.52 (s, 1H), 7.87 (d, *J* = 7.5 Hz, 1H), 7.73 (dd, *J* = 8.5 Hz, 26.0 Hz, 4H), 7.34 (t, *J* = 7.5 Hz, 1H), 7.20 (d, *J* = 8.0 Hz, 1H), 7.00 (t, *J* = 7.5 Hz, 1H), 3.94 (s, 2H), 3.72 (s, 3H) ppm; <sup>13</sup>C NMR (126 MHz, DMSO-d<sub>6</sub>) δ 163.7, 157.0, 152.0, 140.1, 136.4, 134.3, 131.7, 129.4, 129.3, 122.7, 121.2, 120.1, 119.3, 111.4, 94.2, 50.0, 44.7 ppm; HRMS (ESI, quadrupole) *m/z* (M+Na)<sup>+</sup> calcd. for C<sub>19</sub>H<sub>14</sub>BrNNaO<sub>2</sub> 390.0106, found 390.0110.

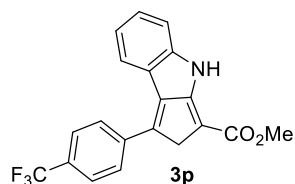

**3p:** Prepared according to the general procedure II above and obtained as yellow solid (42.3 mg, 79% yield, M.P. = 228 - 234 °C), eluent: PE/EA = 4:1; <sup>1</sup>H NMR (500 MHz, DMSO-d<sub>6</sub>) δ 10.57 (s, 1H), 8.00 (d, *J* = 8.0 Hz, 2H), 7.91 (d, *J* = 7.5 Hz, 1H), 7.85 (d, *J* = 8.0 Hz, 2H), 7.36 (t, *J* = 7.5 Hz, 1H), 7.21 (d, *J* = 8.0 Hz, 1H), 7.01 (t, *J* = 7.5 Hz, 1H), 4.01 (s, 2H), 3.73 (s, 3H) ppm; <sup>13</sup>C NMR (126 MHz, DMSO-d<sub>6</sub>) δ 163.6, 156.7, 152.1, 139.1, 139.0, 137.7, 129.7, 127.8, 125.6 (q, *J*<sub>CF</sub> = 2.8), 122.9, 120.1, 119.0, 111.4, 95.2, 50.1, 44.7 ppm; <sup>19</sup>F NMR (376 MHz, DMSO-d<sub>6</sub>) δ -61.1 ppm; HRMS (ESI, quadrupole) *m/z* (M+H)<sup>+</sup> calcd. for C<sub>20</sub>H<sub>15</sub>F<sub>3</sub>NO<sub>2</sub> 358.1055, found 358.1049.

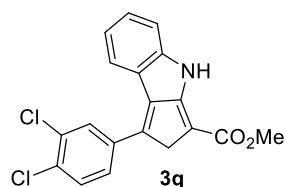

**3q:** Prepared according to the general procedure II above and obtained as yellow solid (48.9 mg, 91% yield, M.P. = 223 - 225 °C), eluent: PE/EA = 4:1; <sup>1</sup>H NMR (500 MHz, DMSO-d<sub>6</sub>) δ 10.51 (s, 1H), 7.95 (s, 1H), 7.80 – 7.72 (m, 3H), 7.34 (t, *J* = 8.0 Hz, 1H), 7.20 (d, *J* = 7.5 Hz, 1H), 7.01 (t, *J* = 7.5 Hz, 1H), 3.94 (s, 2H), 3.72 (s, 3H) ppm; <sup>13</sup>C NMR (126

MHz, DMSO-d<sub>6</sub>) δ 163.8, 156.9, 152.3, 138.5, 137.5, 135.9, 131.7, 131.0, 130.3, 129.8, 128.9, 127.5, 122.9, 120.3, 119.2, 111.7, 95.2, 50.3, 44.9 ppm; HRMS (ESI, quadrupole)  $m/z$  (M+Na)<sup>+</sup> calcd. for C<sub>19</sub>H<sub>13</sub>Cl<sub>2</sub>NNaO<sub>2</sub> 358.0402, found 358.0401.

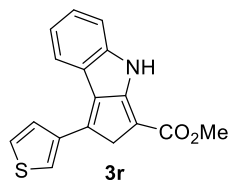

**3r**: Prepared according to the general procedure II above and obtained as yellow solid (14.6 mg, 33% yield, M.P. = 233 - 236 °C), eluent: PE/EA = 5:1; <sup>1</sup>H NMR (500 MHz, DMSO-d<sub>6</sub>) δ 10.47 (s, 1H), 8.01 (s, 1H), 7.91 (d, *J* = 7.5 Hz, 1H), 7.72 – 7.70 (m, 1H), 7.59 (d, *J* = 5.0 Hz, 1H), 7.32 (t, *J* = 7.5 Hz, 1H), 7.19 (d, *J* = 8.0 Hz, 1H), 7.02 (t, *J* = 7.5 Hz, 1H), 3.94 (s, 2H), 3.71 (s, 3H) ppm; <sup>13</sup>C NMR (126 MHz, DMSO-d<sub>6</sub>) δ 169.2, 163.0, 157.0, 142.0, 141.9, 140.0, 134.3, 132.6, 130.2, 128.3, 125.6, 125.1, 116.7, 97.7, 55.4, 50.8 ppm; HRMS (ESI, quadrupole)  $m/z$  (M+H)<sup>+</sup> calcd. for C<sub>17</sub>H<sub>14</sub>NO<sub>2</sub>S 296.0745, found 296.0743.

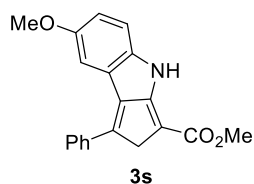

**3s**: Prepared according to the general procedure II above and obtained as yellow solid (30.1 mg, 63% yield, M.P. = 220 - 224 °C), eluent: PE/EA = 4:1; <sup>1</sup>H NMR (500 MHz, DMSO-d<sub>6</sub>) δ 10.28 (s, 1H), 7.80 (d, *J* = 7.5 Hz, 2H), 7.53 (t, *J* = 7.5 Hz, 2H), 7.41 – 7.47 (m, 2H), 7.11 (d, *J* = 8.5 Hz, 1H), 6.98 – 6.96 (m, 1H), 3.94 (s, 2H), 3.75 (s, 3H), 3.71 (s, 3H) ppm; <sup>13</sup>C NMR (126 MHz, DMSO-d<sub>6</sub>) δ 163.7, 157.7, 153.3, 146.0, 142.3, 136.0, 135.1, 128.8, 128.2, 127.3, 120.1, 115.2, 111.6, 108.0, 93.1, 55.3, 49.9, 44.6 ppm; HRMS (ESI, quadrupole)  $m/z$  (M+H)<sup>+</sup> calcd. for C<sub>20</sub>H<sub>18</sub>NO<sub>3</sub> 320.1287, found 320.1284.

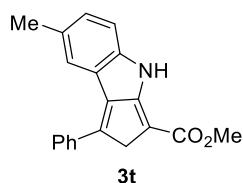

**3t**: Prepared according to the general procedure II above and obtained as yellow

solid (26.8 mg, 59% yield, M.P. = 247 - 253 °C), eluent: PE/EA = 4:1;  $^1\text{H}$  NMR (500 MHz, DMSO- $d_6$ )  $\delta$  10.33 (s, 1H), 7.80 (d,  $J$  = 6.5 Hz, 2H), 7.66 (s, 1H), 7.52 (s, 2H), 7.39 (d,  $J$  = 5.5 Hz, 1H), 7.13 – 7.09 (m, 2H), 3.93 (s, 2H), 3.72 (s, 3H), 3.32 (s, 3H) ppm;  $^{13}\text{C}$  NMR (126 MHz, DMSO- $d_6$ )  $\delta$  164.0, 157.7, 150.0, 141.9, 136.1, 135.4, 130.1, 129.0, 128.3, 127.5, 123.0, 119.9, 111.2, 93.5, 50.1, 44.9, 20.8 ppm; HRMS (ESI, quadrupole)  $m/z$  (M+H) $^+$  calcd. for  $\text{C}_{20}\text{H}_{18}\text{NO}_2$  304.1338, found 304.1345.

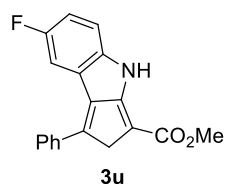

**3u:** Prepared according to the general procedure II above and obtained as yellow solid (16.6 mg, 36% yield, M.P. = 245 - 251 °C), eluent: PE/EA = 4:1;  $^1\text{H}$  NMR (500 MHz, DMSO- $d_6$ )  $\delta$  10.51 (s, 1H), 7.79 (d,  $J$  = 7.5 Hz, 2H), 7.60 – 7.58 (m, 1H), 7.54 (t,  $J$  = 8.0 Hz, 2H), 7.41 (t,  $J$  = 7.0 Hz, 1H), 7.22 – 7.16 (m, 2H), 3.98 (s, 2H), 3.72 (s, 3H) ppm;  $^{13}\text{C}$  NMR (126 MHz, DMSO- $d_6$ )  $\delta$  164.3, 158.1, 157.3 (d,  $^1J_{\text{C-F}}$  = 264.0 Hz), 148.9, 144.1, 136.0 (d,  $^4J_{\text{C-F}}$  = 3.4 Hz), 135.5, 129.6, 129.2, 128.1, 121.0 (d,  $^3J_{\text{C-F}}$  = 9.6 Hz), 116.5 (d,  $^2J_{\text{C-F}}$  = 24.6 Hz), 112.5 (d,  $^3J_{\text{C-F}}$  = 8.7 Hz), 109.8 (d,  $^2J_{\text{C-F}}$  = 25.3 Hz), 94.6, 50.7, 45.5 ppm;  $^{19}\text{F}$  NMR (376 MHz, DMSO- $d_6$ )  $\delta$  -123.2 ppm; HRMS (ESI, quadrupole)  $m/z$  (M+H) $^+$  calcd. for  $\text{C}_{19}\text{H}_{15}\text{FNO}_2$  308.1087, found 308.1090.

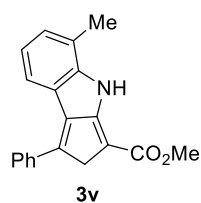

**3v:** Prepared according to the general procedure II above and obtained as yellow solid (36.0 mg, 79% yield, M.P. = 208 - 210 °C), eluent: PE/EA = 4:1;  $^1\text{H}$  NMR (500 MHz, DMSO- $d_6$ )  $\delta$  9.90 (s, 1H), 7.79 (d,  $J$  = 7.5 Hz, 2H), 7.72 (d,  $J$  = 8.0 Hz, 1H), 7.51 (t,  $J$  = 7.5 Hz, 2H), 7.39 (t,  $J$  = 7.0 Hz, 1H), 7.15 (d,  $J$  = 7.5 Hz, 1H), 6.93 (t,  $J$  = 7.5 Hz, 1H), 3.96 (s, 2H), 3.73 (s, 3H), 2.42 (s, 3H) ppm;  $^{13}\text{C}$  NMR (126 MHz, DMSO- $d_6$ )  $\delta$  163.9, 157.3, 150.5, 141.6, 136.6, 135.4, 130.6, 128.9, 128.3, 127.5, 121.0, 120.4, 120.1, 119.6, 94.8, 50.2, 45.2, 17.0 ppm; HRMS (ESI, quadrupole)  $m/z$  (M+H) $^+$  calcd. for  $\text{C}_{20}\text{H}_{18}\text{NO}_2$  304.1338, found 304.1333.



### Failed substrates:

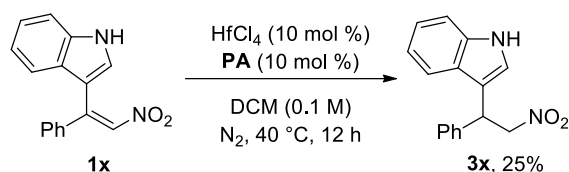

Compound **1x** is a known compound prepared according to literature precedures.<sup>13</sup>

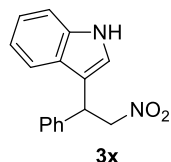

**3x**: Prepared according to the general procedure II above and obtained as white solid (10.0 mg, 25% yield), eluent: PE/EA = 6:1; <sup>1</sup>H NMR (500 MHz, CDCl<sub>3</sub>) δ 8.08 (s, 1H), 7.44 (d, *J* = 7.5 Hz, 1H), 7.37 – 7.30 (m, 5H), 7.27 – 7.24 (m, 1H), 7.21 – 7.18 (m, 1H), 7.09 – 7.06 (m, 1H), 7.04 – 7.03 (m, 1H), 5.19 (t, *J* = 8.0 Hz, 1H), 5.07 (dd, *J* = 12.5, 7.5 Hz, 1H), 4.94 (dd, *J* = 12.5, 8.5 Hz, 1H) ppm; <sup>13</sup>C NMR (126 MHz, CDCl<sub>3</sub>) δ 139.3, 136.5, 129.0, 127.8, 127.6, 126.1, 122.7, 121.7, 120.0, 119.0, 114.4, 111.5, 79.6, 41.6 ppm.

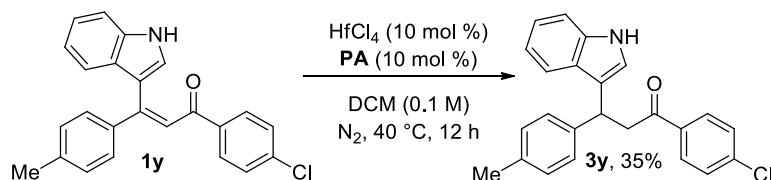

**1y** was prepared according to literature precedures.<sup>1</sup>

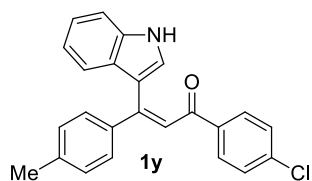

**1y**: Yellow solid (0.76 g, 2.04 mmol, 50% yield, *E/Z* = 77:23), eluent: DCM; <sup>1</sup>H NMR (500 MHz, DMSO-*d*<sub>6</sub>) δ 11.76 (s, 1H), 11.44 (s, 0.33H), 7.90 (d, *J* = 8.5 Hz, 2H), 7.82 (d, *J* = 8.5 Hz, 0.66H), 7.52 – 7.49 (m, 4.33H), 7.40 (d, *J* = 8.0 Hz, 0.33H), 7.36 (d, *J* = 8.5 Hz, 2H), 7.30 (d, *J* = 3.0 Hz, 1H), 7.22 – 7.17 (m, 1.66H), 7.14 – 7.10 (m, 4.33H), 7.08 (d, *J* = 7.5 Hz, 0.66H), 7.04 (t, *J* = 7.5 Hz, 0.33H), 6.92 (s, 0.33H), 6.84 (t, *J* = 8.0 Hz, 0.33H), 6.72 (d, *J* = 8.0 Hz, 0.33H), 2.35 (s, 1H), 2.33 (s, 3H) ppm; <sup>13</sup>C NMR (126 MHz, DMSO-*d*<sub>6</sub>) δ 190.9, 189.4, 152.7, 149.2, 139.5, 139.2, 138.5, 137.9, 137.7, 137.6, 137.3, 137.2,

136.8, 131.2, 130.40, 130.37, 130.3, 129.7, 129.5, 129.2, 129.0, 128.9, 128.7, 126.9, 125.6, 122.8, 121.9, 121.22, 121.16, 120.7, 120.5, 119.9, 117.7, 116.9, 113.6, 113.0, 112.3, 21.38, 21.36 ppm.

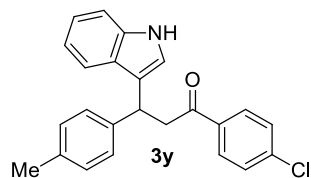

**3y**: Prepared according to the general procedure II above and obtained as white solid (19.6 mg, 35% yield), eluent: PE/EA = 6:1;  $^1\text{H}$  NMR (500 MHz,  $\text{CDCl}_3$ )  $\delta$  7.94 (s, 1H), 7.86 – 7.83 (m, 2H), 7.44 (d,  $J$  = 8.0 Hz, 1H), 7.40 – 7.37 (m, 2H), 7.31 (d,  $J$  = 8.5 Hz, 1H), 7.22 (d,  $J$  = 8.0 Hz, 2H), 7.16 – 7.13 (m, 1H), 7.06 (d,  $J$  = 8.0 Hz, 2H), 7.03 – 7.00 (m, 1H), 6.96 (d,  $J$  = 2.0 Hz, 1H), 5.00 (t,  $J$  = 7.5 Hz, 1H), 3.75 (dd,  $J$  = 16.5, 6.5 Hz, 1H), 3.66 (dd,  $J$  = 16.5, 7.5 Hz, 1H), 2.27 (s, 3H) ppm;  $^{13}\text{C}$  NMR (126 MHz,  $\text{CDCl}_3$ )  $\delta$  197.5, 141.0, 139.4, 136.7, 135.9, 135.5, 129.6, 129.2, 128.9, 127.6, 126.6, 122.2, 121.3, 119.5, 119.5, 119.4, 111.1, 45.2, 37.9, 21.0 ppm.

### (C) Transformations of 2,4-dihydrocyclo-pent[b]indole **3a**

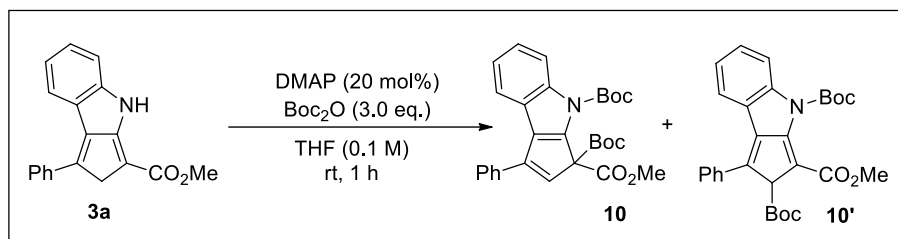

To a 10 mL tube equipped with a magnetic stir bar was added 2,4-dihydrocyclo-pent[b]indole **3a** (1 mmol, 1.0 equiv) and DMAP (0.2 mmol, 20 mol %). Then, THF (10.0 mL, 0.1 M) and Boc<sub>2</sub>O (3.0 mmol, 3.0 equiv) was added. The reaction mixture was stirred at room temperature for 1 h. After reaction, the mixture was concentrated under vacuum. Purification of mixture by column chromatography on silica gel to give the mixture of product **10** and **10'**.

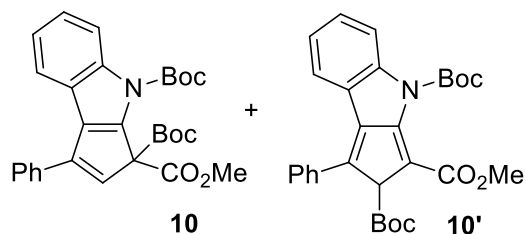

**10** and **10'**: Yellow foam solid (330 mg, 67% yield, **10/10'** = 88:12, M.P. = 57 - 60 °C), eluent: PE/EA = 10:1; <sup>1</sup>H NMR (500 MHz, CDCl<sub>3</sub>) δ 8.29 (d, *J* = 8.5 Hz, 1H), 8.21 (d, *J* = 8.5 Hz, 0.14H), 7.75 – 7.73 (m, 2H), 7.68 (d, *J* = 8.0 Hz, 1H), 7.61 – 7.60 (m, 0.28H), 7.51 – 7.48 (m, 2.42H), 7.44 – 7.41 (m, 1.14H), 7.35 – 7.30 (m, 1.14H), 7.26 – 7.23 (m, 1.14H), 6.20 (s, 1H), 5.01 (s, 0.14H), 3.73 (s, 0.42H), 3.69 (s, 3H), 1.70 (s, 1.26H), 1.66 (s, 9H), 1.37 (s, 9H), 1.36 (s, 1.26H) ppm; <sup>13</sup>C NMR (126 MHz, CDCl<sub>3</sub>) δ 168.5, 166.2, 163.9, 162.9, 149.4, 149.2, 144.44, 144.0, 140.10, 139.96, 134.7, 134.5, 128.9, 128.7, 128.61, 128.58, 127.9, 127.8, 127.7, 127.6, 125.2, 124.6, 124.0, 123.7, 123.5, 123.3, 123.0, 120.0, 119.6, 116.4, 116.2, 85.3, 84.8, 82.5, 80.7, 67.4, 53.8, 52.8, 52.5, 28.2, 28.1, 28.0, 27.8 ppm; HRMS (ESI, quadrupole) *m/z* (M+H)<sup>+</sup> calcd. for C<sub>29</sub>H<sub>32</sub>NO<sub>6</sub> 490.2230, found 490.2226.

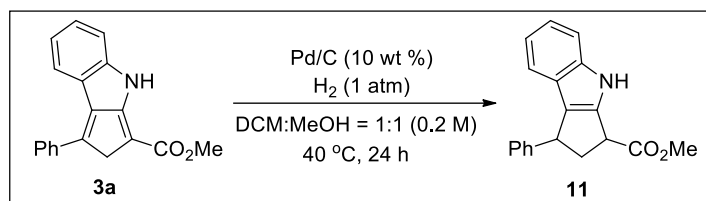

To an oven-dried 10 mL round-bottom flask equipped with a stir bar was added 2,4-dihydrocyclo-pent[b]indole **3a** (0.4 mmol, 1.0 equiv) and Pd/C (10 wt % of Pd). The flask was evacuated and backfilled with H<sub>2</sub> for three times. Then, DCM (1.0 mL) and MeOH (1.0 mL) was added via a syringe. The flask was equipped with a H<sub>2</sub> balloon (1 atm), and the mixture was stirred at 40 °C for 24 h. The reaction mixture was filtered through a pad of Celite, and the filtrate was concentrated under vacuum and purified by column chromatography on silica gel to give the desired product **3ab**.

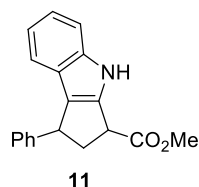

**11**: Yellow solid (90 mg, 77% yield, dr = 62:38, M.P. = 125 - 130 °C), eluent: PE/EA = 6:1; <sup>1</sup>H NMR (500 MHz, CDCl<sub>3</sub>) δ 8.23 (s, 1H), 8.19 (s, 0.61H), 7.35 (d, *J* = 8.0 Hz, 1.61H), 7.30 – 7.27 (m, 4.83H), 7.24 – 7.19 (m, 3.83H), 7.15 – 7.12 (m, 2.61H), 7.02 – 6.96 (m, 1.61H), 4.62 (t, *J* = 6.5 Hz, 0.61H), 4.44 (t, *J* = 6.5 Hz, 1H), 4.25 – 4.23 (m, 0.61H), 4.19 (t, *J* = 7.5 Hz, 1H), 3.78 (s, 3H), 3.76 (s, 1.83H), 3.41 – 3.36 (m, 0.61H), 3.29 – 3.23 (m, 1H), 2.67 – 2.61 (m, 1.61H) ppm; <sup>13</sup>C NMR (126 MHz, CDCl<sub>3</sub>) δ 172.70, 172.67, 145.2, 144.7, 141.3, 139.82, 139.75, 128.50, 128.47, 127.5, 127.3, 126.4, 126.3, 124.1, 122.9, 122.5, 121.7, 121.6, 119.9, 119.8, 119.3, 119.2, 111.8, 52.3, 44.1, 43.9, 43.8, 43.44, 43.39, 43.2 ppm; HRMS (ESI) calcd for C<sub>19</sub>H<sub>18</sub>NO<sub>2</sub><sup>+</sup> (M+H)<sup>+</sup> 292.1338, found 292.1336.

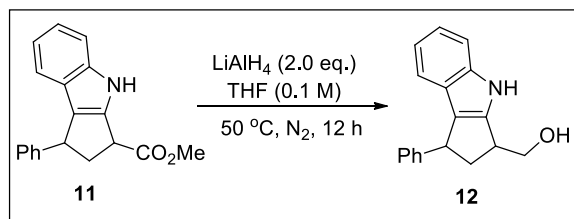

To a 10 mL Schlenk tube equipped with a magnetic stir bar was added compounds **11** (0.1 mmol, 1.0 equiv) and LiAlH<sub>4</sub> (0.2 mmol, 2.0 equiv). The resulting mixture was sealed and degassed via vacuum evacuation and subsequent backfill with nitrogen for three times. Then anhydrous THF (1.0 mL, 0.1 M) was added under nitrogen atmosphere. The reaction mixture was stirred at 50 °C for 12 h. After reaction, the mixture was concentrated under vacuum. Purification of mixture by column chromatography on silica gel to give the desired product **12**.

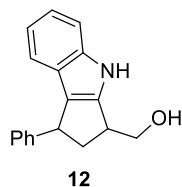

**12**: Brown oil (16 mg, 61% yield, dr = 71:29), eluent: PE/EA = 2:1; <sup>1</sup>H NMR (500 MHz, CDCl<sub>3</sub>) δ 8.35 (s, 1H), 8.27 (s, 0.4H), 7.34 (d, *J* = 8.0 Hz, 1.4H), 7.29 – 7.25 (m, 4.2H), 7.22 – 7.17 (m, 2.8H), 7.14 – 7.09 (m, 2.8H), 7.01 – 6.96 (m, 1.4H), 4.54 – 4.52 (m, 0.4H), 4.50 – 4.47 (m, 1H), 3.97 – 3.91 (m, 1.4H), 3.69 – 3.63 (m, 1.4H), 3.62 – 3.56 (m, 0.4H), 3.54 – 3.48 (m, 1H), 3.12 – 3.06 (m, 1H), 2.72 – 2.66 (m, 0.4H), 2.53 – 2.48 (m, 0.4H), 1.92 – 1.87 (m, 1H), 1.73 (s, 1.4H) ppm; <sup>13</sup>C NMR (126 MHz, CDCl<sub>3</sub>) δ 146.1, 146.0, 145.5, 141.07, 140.98, 128.5, 127.4, 127.3, 126.2, 126.1, 124.21, 124.18, 121.7, 121.1, 121.02, 120.99, 119.7, 119.6, 119.01, 118.99, 111.7, 111.6, 67.0, 66.5, 44.0, 43.5, 43.12, 43.09, 41.6, 41.2 ppm; HRMS (ESI) calcd for C<sub>18</sub>H<sub>18</sub>NO<sup>+</sup> (M+H)<sup>+</sup> 264.1388, found 264.1386.

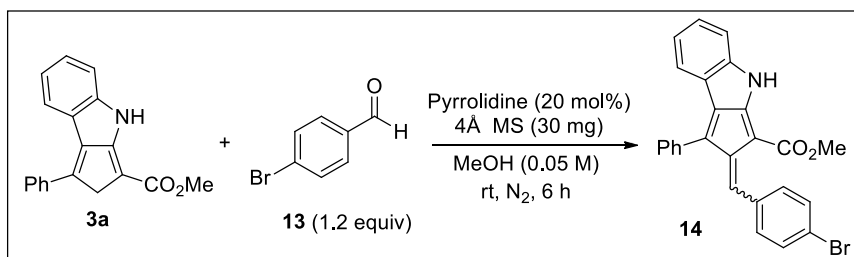

**Synthesis of 14:** To a 10 mL Schlenk tube equipped with a magnetic stir bar was added compounds **3a** (0.1 mmol, 1.0 equiv), 4-bromobenzaldehyde (0.12 mmol, 1.2 equiv) and 4Å molecular sieve (30 mg). The resulting mixture was sealed and degassed via vacuum evacuation and subsequent backfill with nitrogen for three times. Then, pyrrolidine (0.02 mmol, 0.2 equiv) was dissolved in anhydrous MeOH (2.0 mL, 0.05 M), the solution was added to the tube under nitrogen atmosphere. The reaction mixture was stirred at room temperature for 6 h. After reaction, the mixture was concentrated under vacuum. Purification of mixture by column chromatography on silica gel to give the desired product **14**.

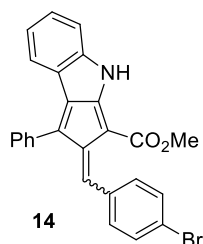

**14:** Brown solid (30.2 mg, 66% yield, dr = 89:11, M.P. = 179 – 182 °C), eluent: PE/EA = 6:1; <sup>1</sup>H NMR (500 MHz, CDCl<sub>3</sub>) δ 8.50 (s, 0.12H), 8.28 (s, 1H), 7.58 (d, *J* = 7.0 Hz, 2H), 7.54 – 7.49 (m, 3.12H), 7.47 – 7.44 (m, 3H), 7.28 (d, *J* = 8.5 Hz, 2H), 7.22 (t, *J* = 8.0 Hz, 1H), 7.18 – 7.15 (m, 0.36H), 7.12 – 7.07 (m, 1.48H), 7.01 (d, *J* = 8.0 Hz, 1.24H), 6.97 (d, *J* = 8.0 Hz, 0.12H), 6.90 (t, *J* = 7.5 Hz, 1.24H), 6.84 (t, *J* = 7.5 Hz, 0.12H), 3.89 (s, 0.36H), 3.47 (s, 3H) ppm; <sup>13</sup>C NMR (126 MHz, CDCl<sub>3</sub>) δ 164.6, 163.0, 149.6, 149.2, 144.14, 144.08, 139.8, 138.7, 138.6, 136.7, 135.7, 135.1, 134.4, 133.9, 133.2, 132.4, 130.6, 130.4, 130.3, 129.5, 129.1, 128.6, 128.4, 128.0, 127.0, 123.4, 123.0, 122.6, 122.0, 121.60, 121.57, 121.4, 111.3, 111.1, 91.3, 89.5, 50.7, 50.4 ppm; HRMS (ESI, quadrupole) *m/z* (M+H)<sup>+</sup> calcd. for C<sub>26</sub>H<sub>19</sub>NO<sub>2</sub> 456.0599, found 456.0594.

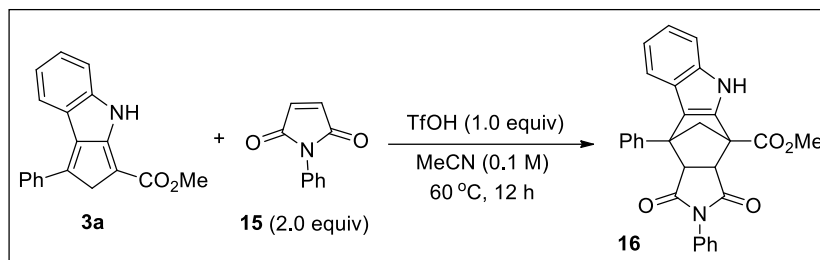

**Synthesis of 16:** To a 10 mL Schlenk tube equipped with a magnetic stir bar was added compounds **3a** (0.1 mmol, 1.0 equiv) and N-phenylmaleimide **15** (0.2 mmol, 2.0 equiv). Then, TfOH (0.1 mmol, 1.0 equiv) was dissolved in MeCN (2.0 mL, 0.05 M), the solution was added to the tube. The reaction mixture was stirred at 60 °C for 12 h. After reaction, the mixture was concentrated under vacuum. Purification of mixture by column chromatography on silica gel to give the desired product **16**.

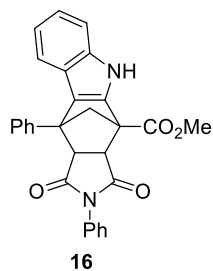

**16:** White solid (15.5 mg, 32% yield, M.P. = 235 – 237 °C), eluent: PE/EA = 3:1;  $^1\text{H}$  NMR (500 MHz, DMSO- $d_6$ )  $\delta$  11.46 (s, 1H), 7.92 (dd,  $J$  = 8.5, 1.5 Hz, 2H), 7.50 (t,  $J$  = 7.5 Hz, 2H), 7.41 – 7.37 (m, 2H), 7.14 – 7.07 (m, 3H), 7.03 (t,  $J$  = 8.0, 2H), 6.97 – 6.94 (m, 1H), 5.81 (dd,  $J$  = 8.0, 1.5 Hz, 2H), 4.42 (d,  $J$  = 7.5 Hz, 1H), 4.32 (d,  $J$  = 7.5 Hz, 1H), 3.90 (s, 3H), 2.70 (d,  $J$  = 8.0 Hz, 1H), 2.61 (d,  $J$  = 8.5 Hz, 1H) ppm;  $^{13}\text{C}$  NMR (126 MHz, DMSO- $d_6$ )  $\delta$  174.6, 174.1, 170.7, 141.6, 140.9, 139.5, 131.9, 129.0, 128.6, 128.34, 128.28, 127.7, 126.8, 122.9, 121.7, 120.7, 120.0, 119.3, 113.3, 64.8, 60.6, 58.9, 54.1, 53.1, 52.0 ppm; HRMS (ESI, quadrupole)  $m/z$  (M+H) $^+$  calcd. for  $\text{C}_{29}\text{H}_{23}\text{N}_2\text{O}_4$  463.1658, found 463.1663.

## V. Control Reaction

### A) The reduction of **1a** with binary acid complex of FeCl<sub>3</sub>/PA as catalyst

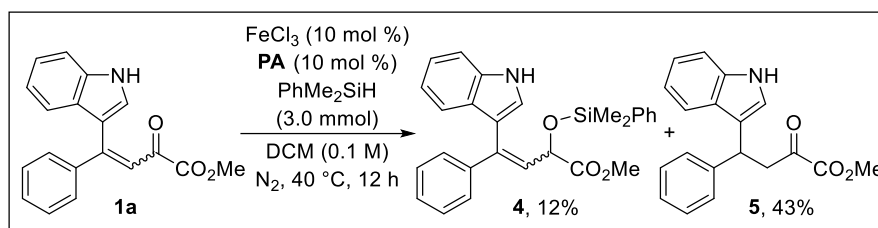

To a 10 mL Schlenk tube equipped with a magnetic stir bar was added  $\gamma$ -Indolyl  $\beta,\gamma$ -unsaturated- $\alpha$ -ketoester derivatives **1a** (0.2 mmol, 1.0 equiv), FeCl<sub>3</sub> (0.02 mmol, 10 mol %) and diphenyl phosphate (0.02 mmol, 10 mol %). The resulting mixture was sealed and degassed via vacuum evacuation and subsequent backfill with nitrogen for three times. Then anhydrous DCM (2.0 mL, 0.1 M) and PhSiHMe<sub>2</sub> (0.6 mmol, 3.0 equiv) was added under nitrogen atmosphere. The reaction mixture was stirred at 40 °C for 12 h. After reaction, the mixture was concentrated under vacuum. Purification of mixture by column chromatography on silica gel (PE/EA = 10:1 to 3:1, v/v) to give the 1,2-adduct **4** (brown oil, 10.6 mg, 12% yield) and 1,4-adduct **5** (light yellow solid, 26.4 mg, 43% yield).

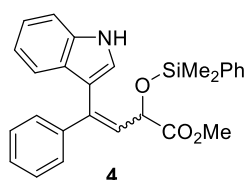

**4**: <sup>1</sup>H NMR (500 MHz, CDCl<sub>3</sub>)  $\delta$  7.95 (s, 1H), 7.51 (d,  $J$  = 7.0 Hz, 2H), 7.35 – 7.29 (m, 3H), 7.27 – 7.23 (m, 4H), 7.21 – 7.19 (m, 3H), 7.15 (t,  $J$  = 7.5 Hz, 1H), 7.00 (t,  $J$  = 7.5 Hz, 1H), 6.82 (s, 1H), 6.54 (d,  $J$  = 10.0 Hz, 1H), 5.37 (d,  $J$  = 10.0 Hz, 1H), 3.66 (s, 3H), 0.46 (s, 3H), 0.45 (s, 3H) ppm; <sup>13</sup>C NMR (126 MHz, CDCl<sub>3</sub>)  $\delta$  166.0, 143.7, 140.2, 138.2, 137.3, 134.1, 130.3, 129.1, 128.8, 128.4, 127.4, 127.1, 125.6, 122.8, 122.7, 120.5, 120.1, 118.8, 111.7, 52.6, 39.8, 0.0, -0.2 ppm; HRMS (ESI, quadrupole)  $m/z$  (M+H)<sup>+</sup> calcd. for C<sub>27</sub>H<sub>28</sub>NO<sub>3</sub>Si 442.1838, found 442.1842.



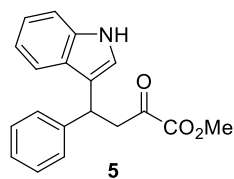

**5:**  $^1\text{H}$  NMR (500 MHz,  $\text{CDCl}_3$ )  $\delta$  8.00 (s, 1H), 7.42 (d,  $J = 8.0$  Hz, 1H), 7.31 (t,  $J = 7.5$  Hz, 3H), 7.26 (t,  $J = 7.5$  Hz, 2H), 7.18 – 7.13 (m, 2H), 7.03 – 7.00 (m, 2H), 4.91 (t,  $J = 7.5$  Hz, 1H), 3.75 (s, 3H), 3.68 (dd,  $J = 17.0, 7.0$  Hz, 1H), 3.60 (dd,  $J = 17.0, 8.0$  Hz, 1H) ppm;  $^{13}\text{C}$  NMR (126 MHz,  $\text{CDCl}_3$ )  $\delta$  192.7, 161.4, 143.2, 136.6, 128.6, 127.8, 126.7, 126.4, 122.3, 121.6, 119.6, 119.4, 118.3, 111.2, 53.0, 45.7, 37.8 ppm.

## B) The reduction of 1,2-adduct **4** under standard conditions

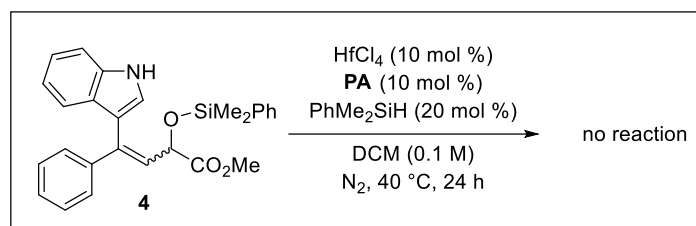

To a 10 mL Schlenk tube equipped with a magnetic stir bar was added 1,2-adduct compound **4** (0.05 mmol, 1.0 equiv), HfCl<sub>4</sub> (0.005 mmol, 10 mol %) and diphenyl phosphate (0.005 mmol, 10 mol %). The resulting mixture was sealed and degassed via vacuum evacuation and subsequent backfill with nitrogen for three times. Then anhydrous DCM (0.5 mL, 0.1 M) and PhSiHMe<sub>2</sub> (0.01 mmol, 20 mol %) was added under nitrogen atmosphere. The reaction mixture was stirred at 40 °C for 24 h. No reaction was observed.

### C) The reduction of 1,4-adduct **5** under standard conditions

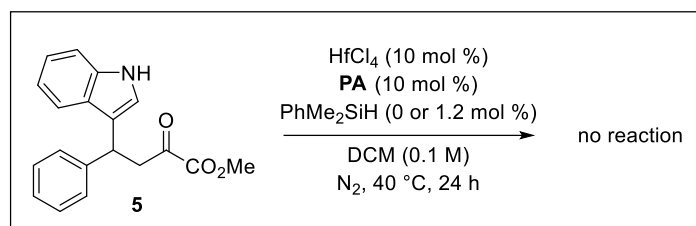

To a 10 mL Schlenk tube equipped with a magnetic stir bar was added 1,4-adduct compound **5** (0.1 mmol, 1.0 equiv), HfCl<sub>4</sub> (0.01 mmol, 10 mol %) and diphenyl phosphate (0.01 mmol, 10 mol %). The resulting mixture was sealed and degassed via vacuum evacuation and subsequent backfill with nitrogen for three times. Then anhydrous DCM (1.0 mL, 0.1 M) and PhSiHMe<sub>2</sub> (0 or 0.12 mmol, 120 mol %) was added under nitrogen atmosphere. The reaction mixture was stirred at 40 °C for 24 h. No reaction was observed.

#### D) The reduction of **1h** with excessive PhMe<sub>2</sub>SiH as reductant

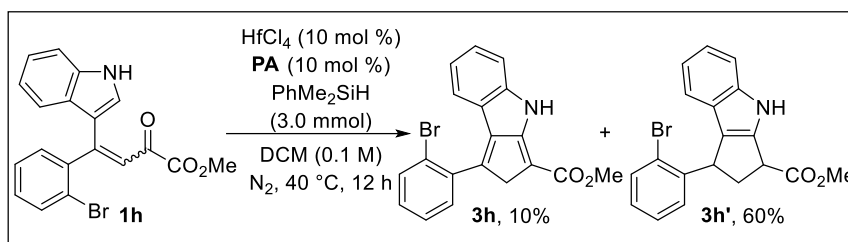

To a 10 mL Schlenk tube equipped with a magnetic stir bar was added  $\gamma$ -Indolyl  $\beta,\gamma$ -unsaturated- $\alpha$ -ketoester derivatives **1h** (0.2 mmol, 1.0 equiv), HfCl<sub>4</sub> (0.02 mmol, 10 mol %) and diphenyl phosphate (0.02 mmol, 10 mol %). The resulting mixture was sealed and degassed via vacuum evacuation and subsequent backfill with nitrogen for three times. Then anhydrous DCM (2.0 mL, 0.1 M) and PhSiHMe<sub>2</sub> (0.6 mmol, 3.0 equiv) was added under nitrogen atmosphere. The reaction mixture was stirred at 40 °C for 12 h. After reaction, the mixture was concentrated under vacuum. Purification of mixture by column chromatography on silica gel (PE/EA = 6:1 to 4:1, v/v) to give the desired product **3h** (yellow solid, 7.4 mg, 10% yield) and **3h'** (light yellow oil, 44.4 mg, 60% yield).

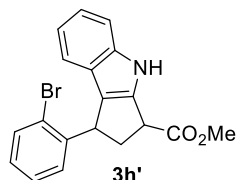

**3h'**: <sup>1</sup>H NMR (500 MHz, CDCl<sub>3</sub>)  $\delta$  8.29 (s, 2H), 7.61 – 7.59 (m, 2H), 7.38 (d, *J* = 7.5 Hz, 2H), 7.23 – 7.14 (m, 6H), 7.10 – 7.00 (m, 5H), 6.95 – 6.93 (m, 1H), 4.98 – 4.95 (m, 1H), 4.84 (t, *J* = 7.0 Hz, 1H), 4.21 (t, *J* = 7.0 Hz, 2H), 3.78 (s, 3H), 3.75 (s, 3H), 3.57 – 3.47 (m, 2H), 2.58 – 2.47 (m, 2H) ppm; <sup>13</sup>C NMR (126 MHz, CDCl<sub>3</sub>)  $\delta$  172.60, 172.58, 144.0, 143.6, 141.38, 141.35, 140.4, 140.3, 132.9, 132.6, 128.9, 128.3, 128.0, 127.9, 127.7, 127.5, 124.4, 124.1, 124.0, 123.9, 121.82, 121.77, 121.4, 121.2, 120.0, 119.9, 119.4, 119.3, 111.84, 111.83, 52.4, 52.3, 43.9, 43.6, 43.1, 43.0, 41.8, 41.3 ppm; HRMS (ESI, quadrupole) *m/z* (M+Na)<sup>+</sup> calcd. for C<sub>19</sub>H<sub>16</sub>BrNNaO<sub>2</sub> 392.0262, found 392.0259.

### H-HCOSY for 1,2,3,4-tetrahydrocyclopenta[*b*]indole 3h'

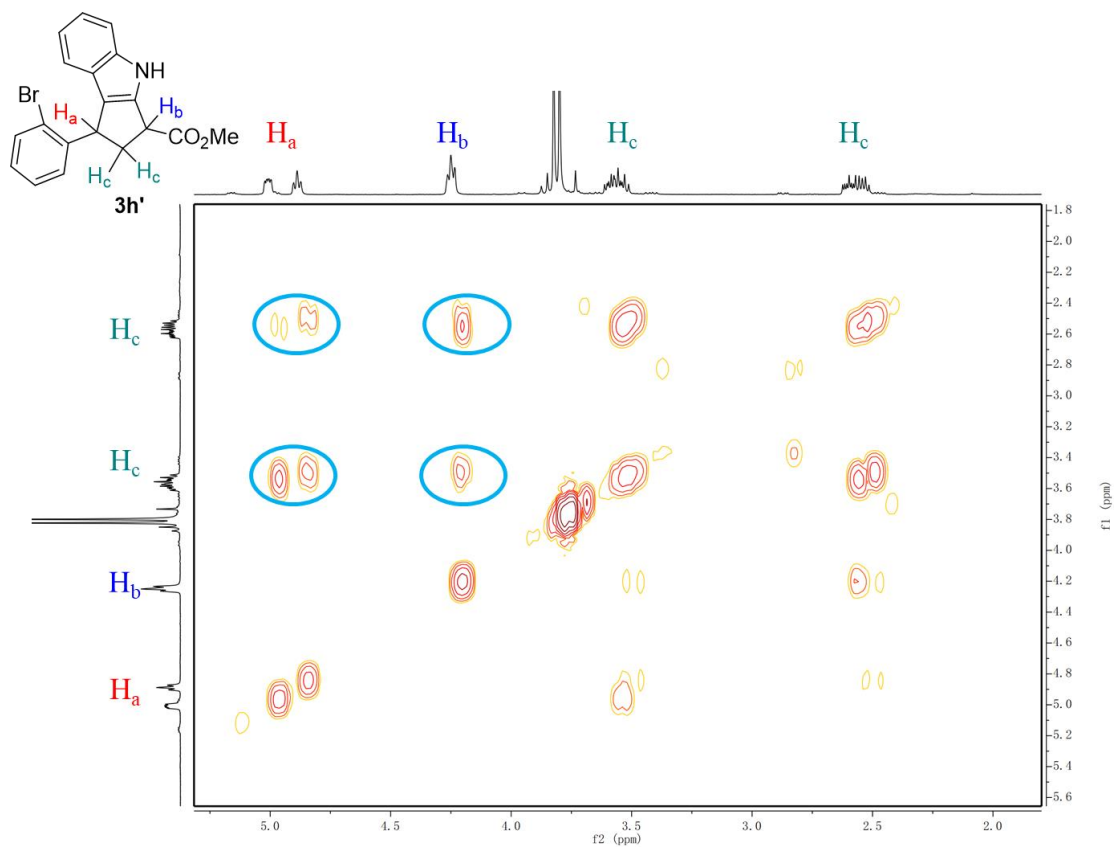

## E) Carbocation capture experiment

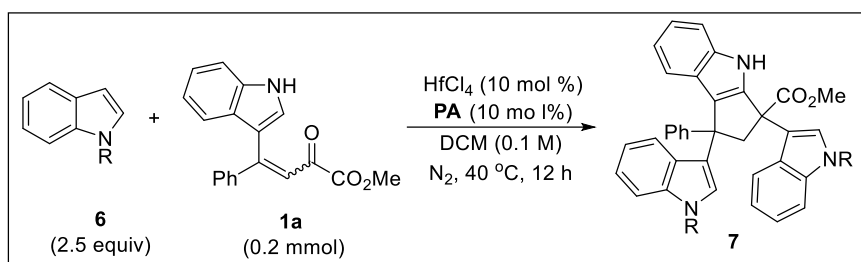

**Aromatic nucleophile:** To a 10 mL Schlenk tube equipped with a magnetic stir bar was added  $\gamma$ -Indolyl  $\beta,\gamma$ -unsaturated- $\alpha$ -ketoester derivatives **1a** (0.2 mmol, 1.0 equiv),  $\text{HfCl}_4$  (0.02 mmol, 10 mol %), diphenyl phosphate (0.02 mmol, 10 mol %) and indole derivatives **6** (0.5 mmol, 2.5 equiv). The resulting mixture was sealed and degassed via vacuum evacuation and subsequent backfill with nitrogen for three times. Then anhydrous DCM (2.0 mL, 0.1 M) was added under nitrogen atmosphere. The reaction mixture was stirred at 40 °C for 12 h. After reaction, the mixture was concentrated under vacuum. Purification of mixture by column chromatography on silica gel to give the bisindole adducts **7**.

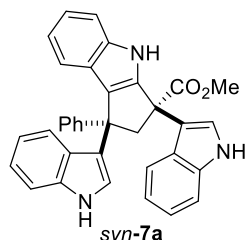

*syn*-**7a**: Light yellow solid (36.5 mg, 35% yield, M.P. = 150 - 158 °C), eluent: DCM/PE = 10:1;  $^1\text{H}$  NMR (500 MHz,  $\text{CDCl}_3$ )  $\delta$  8.28 (s, 1H), 7.55 (s, 1H), 7.51 (d,  $J$  = 8.5 Hz, 1H), 7.39 – 7.36 (m, 4H), 7.25 – 7.16 (m, 3H), 7.13 – 7.07 (m, 5H), 7.05 – 6.95 (m, 4H), 6.83 (t,  $J$  = 7.5 Hz, 1H), 6.51 (d,  $J$  = 22.5 Hz, 2H), 4.31 (d,  $J$  = 13.5 Hz, 1H), 3.75 (d,  $J$  = 13.5 Hz, 1H), 3.62 (s, 3H) ppm;  $^{13}\text{C}$  NMR (126 MHz,  $\text{CDCl}_3$ )  $\delta$  174.1, 147.9, 141.2, 140.6, 136.9, 136.6, 128.1, 127.6, 126.4, 126.3, 125.9, 125.1, 124.0, 123.3, 122.7, 122.4, 122.2, 121.9, 121.6, 121.4, 120.2, 120.1, 119.7, 119.0, 117.7, 112.1, 111.5, 111.0, 58.5, 53.3, 52.8, 50.9 ppm; HRMS (ESI, quadrupole)  $m/z$  ( $\text{M}+\text{Na}$ ) $^+$  calcd. for  $\text{C}_{35}\text{H}_{27}\text{N}_3\text{NaO}_2$  544.2001, found 544.2001.

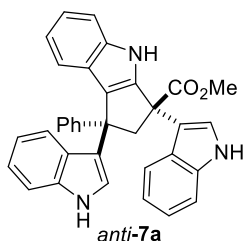

**anti-7a:** Light yellow solid (41.4 mg, 40% yield, M.P. = 161 - 167 °C), eluent: DCM/PE = 10:1; <sup>1</sup>H NMR (500 MHz, CDCl<sub>3</sub>) δ 8.37 (s, 1H), 7.78 (d, *J* = 13.5 Hz, 2H), 7.58 (d, *J* = 8.0 Hz, 1H), 7.34 (d, *J* = 8.0 Hz, 1H), 7.30 – 7.23 (m, 5H), 7.21 – 7.18 (m, 1H), 7.14 – 7.08 (m, 4H), 7.01 – 6.98 (m, 4H), 6.93 (t, *J* = 7.5 Hz, 1H), 6.76 (d, *J* = 33.0 Hz, 2H), 4.32 (d, *J* = 13.5 Hz, 1H), 3.86 (d, *J* = 14.0 Hz, 1H), 3.45 (s, 3H) ppm; <sup>13</sup>C NMR (126 MHz, CDCl<sub>3</sub>) δ 173.9, 147.0, 141.1, 140.5, 137.2, 136.8, 127.8, 127.6, 126.9, 126.5, 125.7, 125.2, 124.0, 123.6, 123.3, 122.52, 122.46, 121.8, 121.7, 121.4, 120.1, 119.99, 119.95, 119.8, 119.2, 117.7, 112.1, 111.6, 111.1, 57.5, 53.5, 52.5, 51.0 ppm; HRMS (ESI, quadrupole) *m/z* (M+Na)<sup>+</sup> calcd. for C<sub>35</sub>H<sub>27</sub>N<sub>3</sub>NaO<sub>2</sub> 544.2001, found 544.2010.

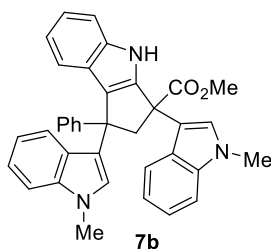

**7b:** Light yellow solid (88.0 mg, 80% yield, *anti/syn* = 74:26, M.P. = 130 - 140 °C), eluent: PE/EA = 4:1; <sup>1</sup>H NMR (500 MHz, CDCl<sub>3</sub>) δ 8.37 (s, 1H), 8.32 (s, 0.35H), 7.57 (d, *J* = 8.0 Hz, 1H), 7.48 (d, *J* = 8.5 Hz, 0.35H), 7.43 (d, *J* = 7.5 Hz, 0.7H), 7.39 (d, *J* = 8.5 Hz, 1H), 7.36 (d, *J* = 8.0 Hz, 1.35H), 7.29 – 7.21 (m, 5.7H), 7.19 (d, *J* = 8.5 Hz, 0.7H), 7.15 (t, *J* = 7.5 Hz, 2.7H), 7.11 – 7.06 (m, 3.05H), 7.04 – 6.97 (m, 5.05H), 6.91 (t, *J* = 7.5 Hz, 1H), 6.84 (t, *J* = 7.5 Hz, 0.35H), 6.74 (s, 1H), 6.73 (s, 0.35H), 6.67 (s, 1H), 6.56 (s, 0.35H), 4.39 (d, *J* = 13.5 Hz, 0.35H), 4.30 (d, *J* = 13.5 Hz, 1H), 3.83 (d, *J* = 13.5 Hz, 1H), 3.74 (d, *J* = 13.5 Hz, 0.35H), 3.65 (s, 4.05H), 3.61 (s, 3H), 3.60 (s, 1.05H), 3.52 (s, 3H), 3.51 (s, 1.05H) ppm; <sup>13</sup>C NMR (126 MHz, CDCl<sub>3</sub>) δ 173.9, 173.8, 147.8, 147.2, 141.2, 141.1, 140.62, 140.57, 137.9, 137.7, 137.6, 137.5, 128.0, 127.9, 127.74, 127.69, 127.6, 127.3, 126.9, 126.8, 126.7, 126.6, 125.8, 125.72, 125.68, 125.5, 124.2, 124.1, 122.1, 122.0, 121.7, 121.54, 121.46, 121.23, 121.17, 120.14, 120.67, 119.99, 119.96, 119.62, 119.56, 118.6,

118.5, 116.3, 116.1, 112.1, 112.0, 109.5, 109.4, 109.1, 109.0, 59.1, 58.0, 53.4, 53.3, 52.7, 52.4, 51.0, 50.9, 32.7, 32.5 ppm; HRMS (ESI) (M+Na)<sup>+</sup> calcd. for C<sub>37</sub>H<sub>31</sub>N<sub>3</sub>NaO<sub>2</sub> 572.2314, found 572.2311.



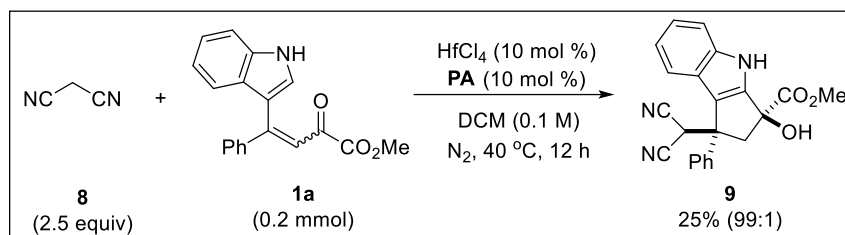

**C-nucleophile:** To a 10 mL Schlenk tube equipped with a magnetic stir bar was added  $\gamma$ -Indolyl  $\beta,\gamma$ -unsaturated- $\alpha$ -ketoester derivatives **1a** (0.2 mmol, 1.0 equiv),  $\text{HfCl}_4$  (0.02 mmol, 10 mol %), diphenyl phosphate (0.02 mmol, 10 mol %) and malononitrile **8** (0.5 mmol, 2.5 equiv). The resulting mixture was sealed and degassed via vacuum evacuation and subsequent backfill with nitrogen for three times. Then anhydrous DCM (2.0 mL, 0.1 M) was added under nitrogen atmosphere. The reaction mixture was stirred at 40 °C for 12 h. After reaction, the mixture was concentrated under vacuum. Purification of mixture by column chromatography on silica gel to give the mono-malononitrile adduct **9**.

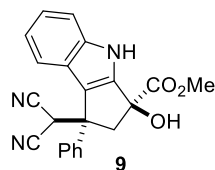

**9:** Yellow solid (18.6 mg, 25% yield, dr = 99:1, M.P. = 99 - 102 °C), eluent: DCM/EA = 10:1;  $^1\text{H}$  NMR (500 MHz,  $\text{CDCl}_3$ )  $\delta$  8.64 (s, 1H), 7.81 (d,  $J$  = 8.0 Hz, 1H), 7.56 (d,  $J$  = 7.0 Hz, 2H), 7.41 – 7.34 (m, 4H), 7.29 – 7.25 (m, 1H), 7.20 (t,  $J$  = 7.5 Hz, 1H), 4.53 (s, 1H), 4.27 (br, 1H), 3.57 (s, 3H), 3.52 (d,  $J$  = 14.5 Hz, 1H), 3.18 (d,  $J$  = 14.5 Hz, 1H) ppm;  $^{13}\text{C}$  NMR (126 MHz,  $\text{CDCl}_3$ )  $\delta$  173.2, 141.9, 141.8, 140.8, 129.1, 128.4, 126.9, 123.9, 122.8, 122.2, 121.6, 121.4, 112.90, 112.88, 112.8, 77.1, 58.2, 54.9, 53.6, 35.7 ppm; HRMS (ESI, quadrupole)  $m/z$  ( $\text{M}+\text{Na}$ ) $^+$  calcd. for  $\text{C}_{22}\text{H}_{17}\text{N}_3\text{NaO}_3$  394.1168, found 394.1169.

### NOESY for mono-malononitrile adduct **9**

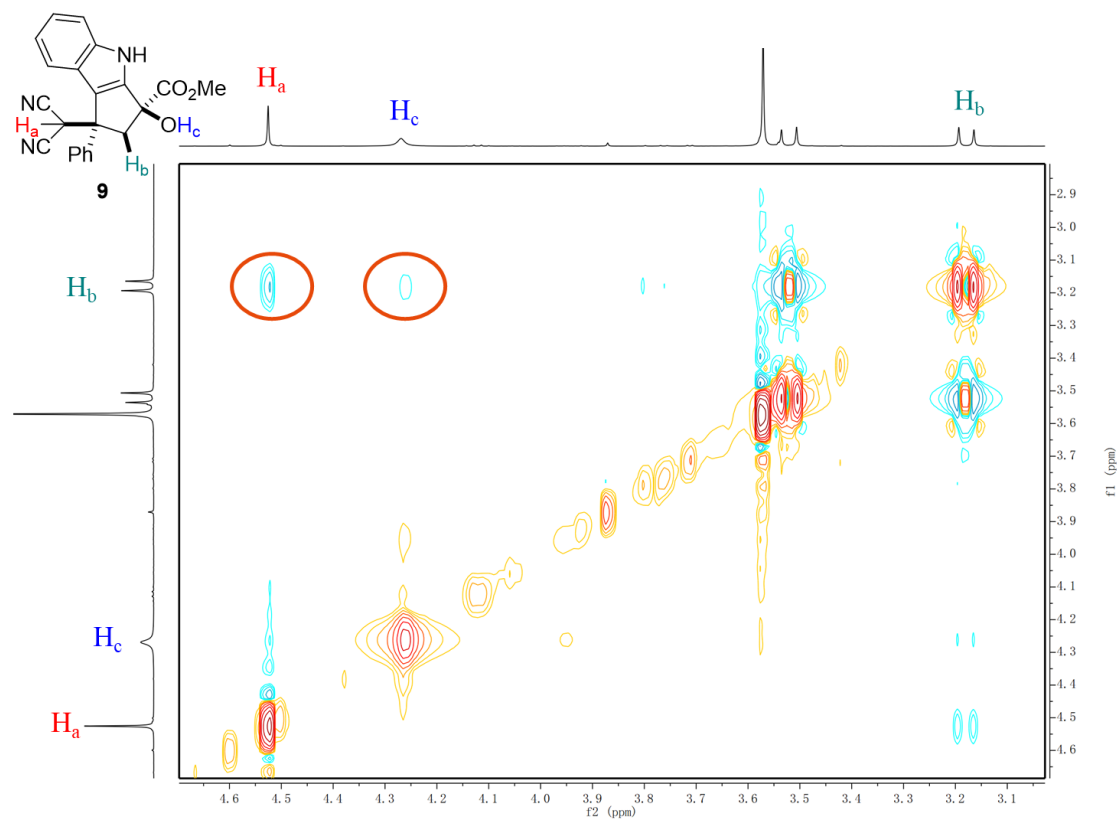

## VI. Deuterium-labelling Experiments

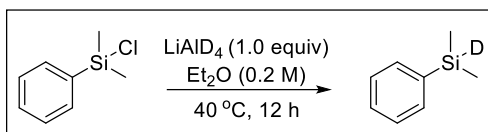

**A) Synthesis of deuterated dimethylphenylsilane:** PhSiDMe<sub>2</sub> were prepared on slightly modified literature precedures.<sup>2</sup> LiAlD<sub>4</sub> (5 mmol, 1.0 equiv) was dissolved in diethyl ether (10 mL, 0.2 M), then PhMe<sub>2</sub>SiCl (15 mmol, 3.0 equiv) was added dropwise under nitrogen atmosphere. The reaction mixture was stirred at 40 °C for 10 h and cooled down to room temperature. Then, the reaction was quenched by adding aqueous solution of sodium hydroxide (15 mL, 10 wt%) into the crude reaction mixture, which was subsequently extracted by diethyl ether for three times. The combined organic layers were dried over Na<sub>2</sub>SO<sub>4</sub>, evaporated under reduced pressure, and purified by column chromatography on silica gel (eluent: PE) to give PhMe<sub>2</sub>SiD (colorless liquid, 1.55g, 75% yield, 99% D). PhSiDMe<sub>2</sub> was analyzed by <sup>1</sup>H NMR.

**PhSiDMe<sub>2</sub>:** <sup>1</sup>H NMR (500 MHz, CDCl<sub>3</sub>) δ 7.55 – 7.53 (m, 2H), 7.37 – 7.34 (m, 3H), 0.34 (s, 6H) ppm.

**$^1\text{H}$  NMR (500 MHz,  $\text{CDCl}_3$ )**

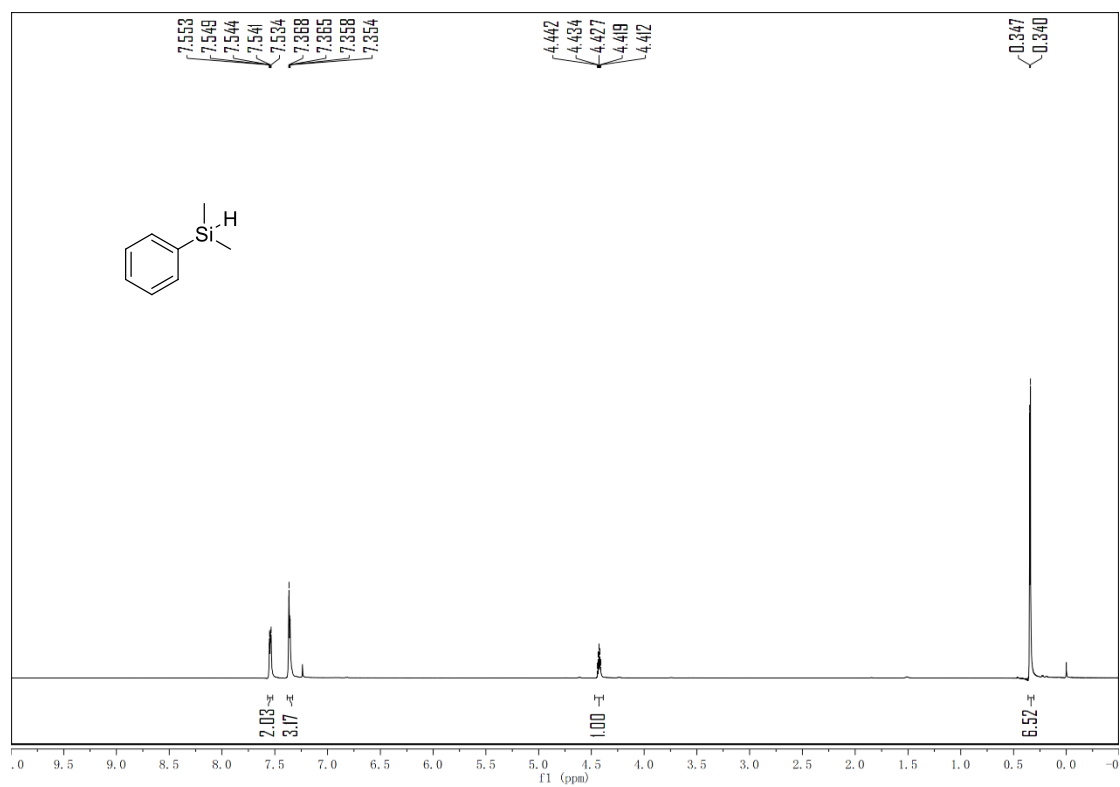

**$^1\text{H}$  NMR (500 MHz,  $\text{CDCl}_3$ )**

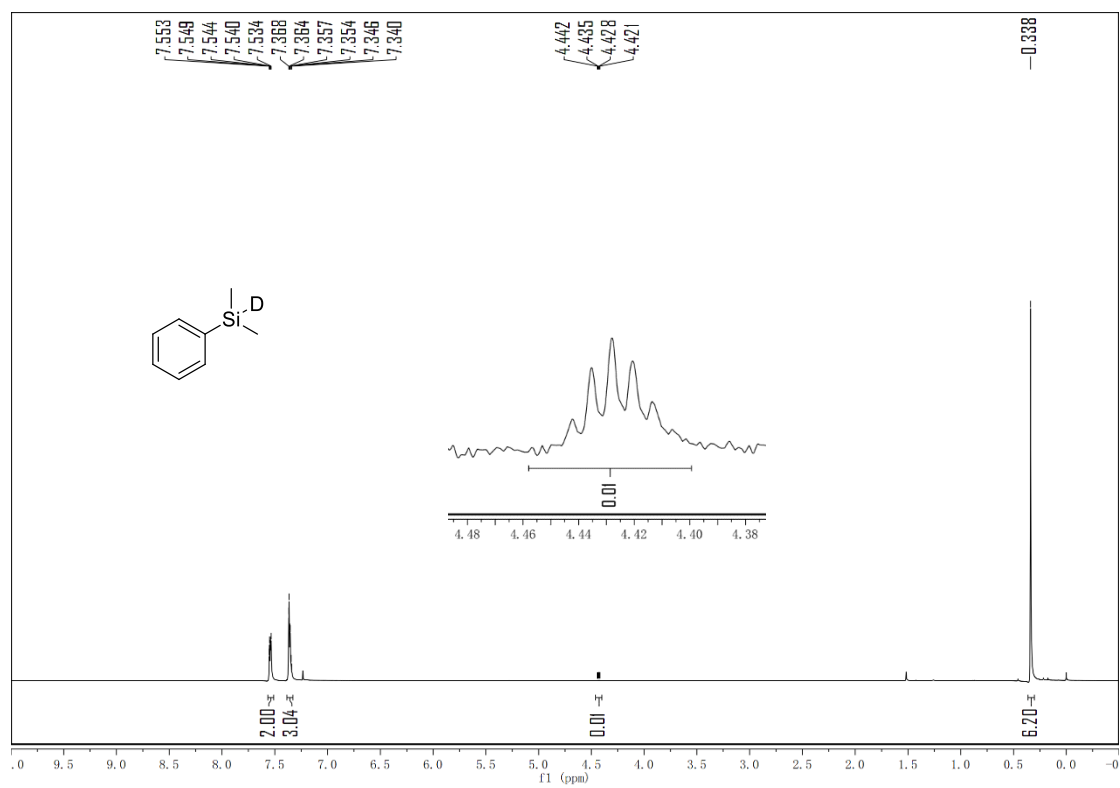

**B) Synthesis of deuterated indole:** Deuterated Indole were prepared according to literature precedures.<sup>3</sup> Deuterated indole was analyzed by <sup>1</sup>H NMR.

**Deuterated indole:** Off-white solid (502 mg, 4.25 mmol, 85% yield, > 95% D); <sup>1</sup>H NMR (500 MHz, CDCl<sub>3</sub>) δ 8.12 (s, 1H), 7.65 (d, *J* = 8.0 Hz, 1H), 7.40 (d, *J* = 8.0 Hz, 1H), 7.20 (t, *J* = 8.0 Hz, 1H), 7.12 (t, *J* = 7.5 Hz, 1H), 6.56 (s, 1H) ppm.

**<sup>1</sup>H NMR (500 MHz, CDCl<sub>3</sub>)**

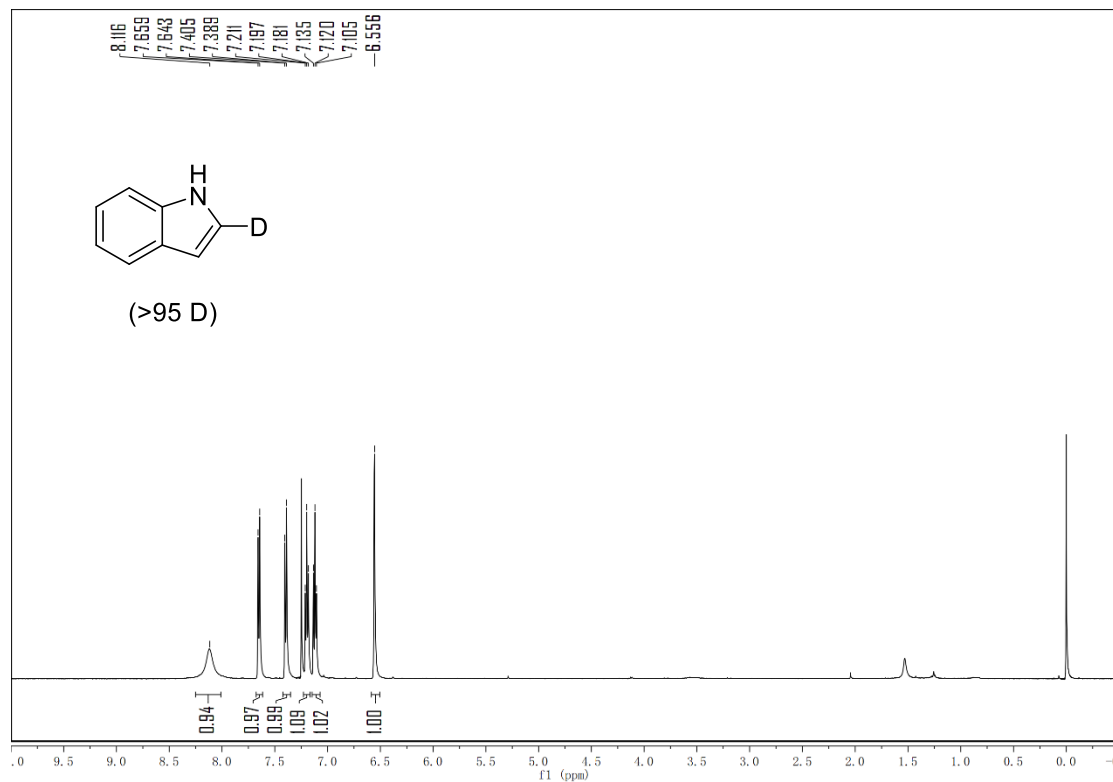

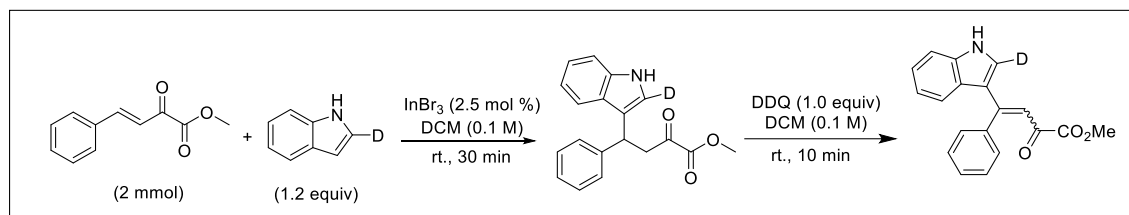

**C) One-pot synthesis of deuterated  $\gamma$ -indolyl  $\beta,\gamma$ -unsaturated  $\alpha$ -keto esters:**  $\beta,\gamma$ -unsaturated- $\alpha$ -ketoester derivatives (2 mmol, 1.0 equiv) and deuterated indole (2.4 mmol, 1.2 equiv) were dissolved in DCM (20 mL, 0.1 M), then  $\text{InBr}_3$  (0.05 mmol, 2.5 mol %) was added. The solution was stirred at room temperature for 30 min. Subsequently, DDQ (2 mmol, 1.0 equiv) was added. The solution was stirred at room temperature for 10 minutes. After reaction, purification of mixture by column chromatography on silica gel (eluent: DCM/EA = 30:1, v/v) gave the deuterated  $\gamma$ -indolyl  $\beta,\gamma$ -unsaturated  $\alpha$ -keto esters **1a[D]**. Deuterated  $\gamma$ -indolyl  $\beta,\gamma$ -unsaturated  $\alpha$ -keto esters was analyzed by  $^1\text{H}$  NMR.

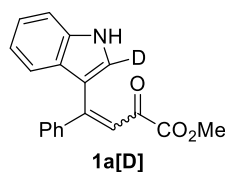

**1a[D]:** Yellow solid (459 mg, 75% yield,  $E/Z = 71:29$ , > 90% D);  $^1\text{H}$  NMR (500 MHz,  $\text{DMSO-d}_6$ )  $\delta$  12.01 (s, 1H), 11.82 (s, 0.4H), 7.54 – 7.43 (m, 7.4H), 7.29 – 7.28 (m, 2H), 7.23 (t,  $J = 7.5$  Hz, 1H), 7.18 – 7.12 (m, 1.4H), 7.05 (s, 1H), 6.91 (t,  $J = 7.5$  Hz, 0.4H), 6.69 – 6.66 (m, 0.8H), 3.44 (s, 3H), 3.13 (s, 1.2H) ppm.

**<sup>1</sup>H NMR (500 MHz, DMSO-d<sub>6</sub>)**

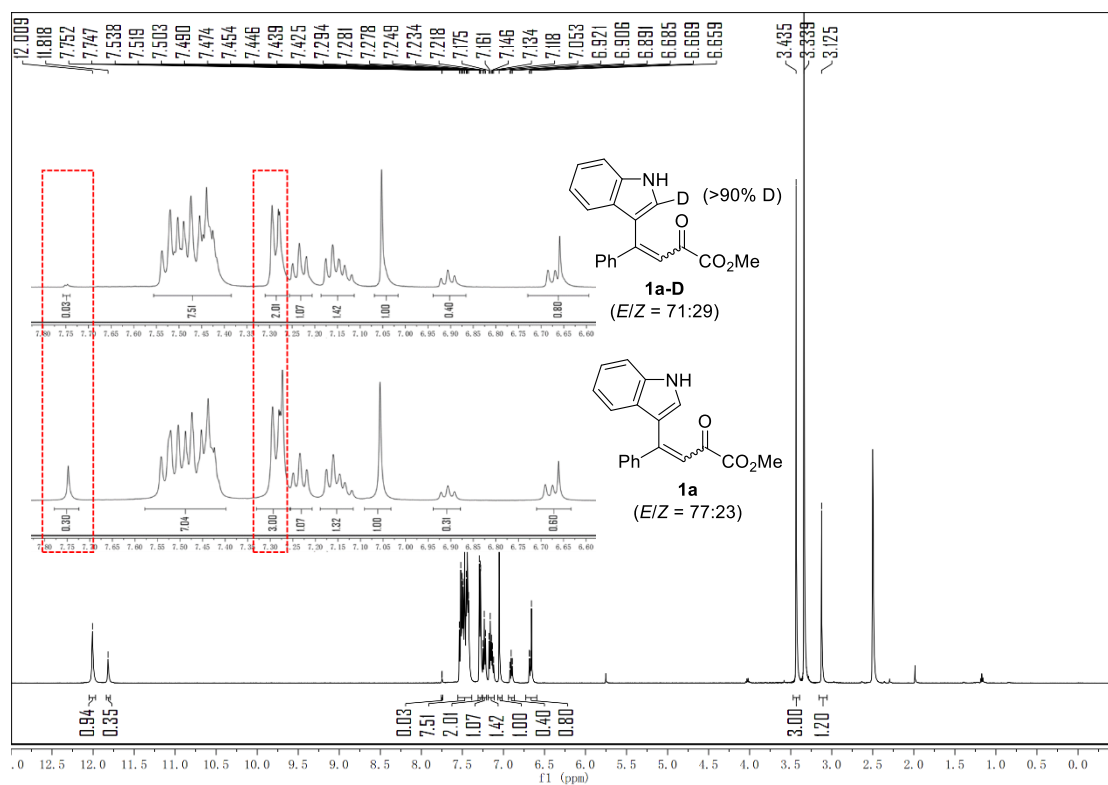

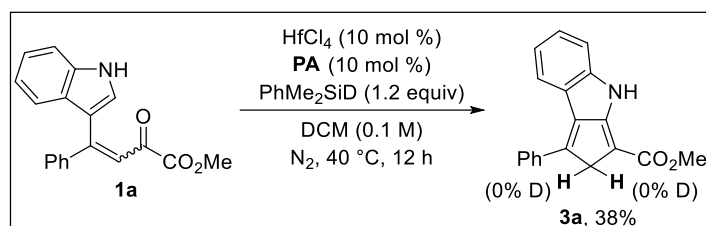

**D) PhMe<sub>2</sub>SiD replaces PhMe<sub>2</sub>SiH as reducing reagent under standard conditions:** To a 10 mL Schlenk tube equipped with a magnetic stir bar was added  $\gamma$ -Indolyl  $\beta,\gamma$ -unsaturated- $\alpha$ -ketoester derivatives **1a** (0.15 mmol, 1.0 equiv), HfCl<sub>4</sub> (0.015 mmol, 10 mol %) and diphenyl phosphate (0.015 mmol, 10 mol %). The resulting mixture was sealed and degassed via vacuum evacuation and subsequent backfill with nitrogen for three times. Then anhydrous DCM (1.5 mL, 0.1 M) and PhSiDMe<sub>2</sub> (0.18 mmol, 1.2 equiv) was added under nitrogen atmosphere. The reaction mixture was stirred at 40 °C for 12 h. After reaction, the mixture was concentrated under vacuum. Purification of mixture by column chromatography on silica gel (PE/EA = 4:1, v/v) to give the desired product **3a** (16.5 mg, 38% yield). Through NMR testing, it was found that compound **3a** was not deuterated.



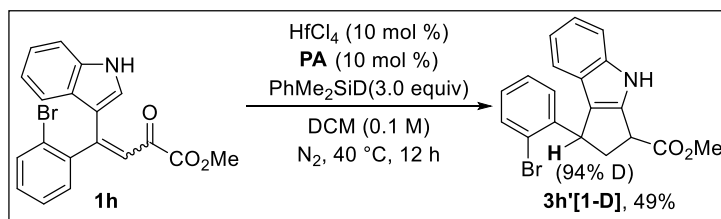

**E) Excessive  $\text{PhMe}_2\text{SiD}$  to reduce **1h** under catalytic conditions:** To a 10 mL Schlenk tube equipped with a magnetic stir bar was added  $\gamma$ -Indolyl  $\beta,\gamma$ -unsaturated- $\alpha$ -ketoester derivatives **1h** (0.15 mmol, 1.0 equiv),  $\text{HfCl}_4$  (0.015 mmol, 10 mol %) and diphenyl phosphate (0.015 mmol, 10 mol %). The resulting mixture was sealed and degassed via vacuum evacuation and subsequent backfill with nitrogen for three times. Then anhydrous DCM (1.5 mL, 0.1 M) and  $\text{PhSiDMe}_2$  (0.45 mmol, 3.0 equiv) was added under nitrogen atmosphere. The reaction mixture was stirred at 40 °C for 12 h. After reaction, the mixture was concentrated under vacuum. Purification of mixture by column chromatography on silica gel (PE/EA = 6:1, v/v) to give the desired product **3h'-D** (26.7 mg, 49% yield). Through NMR testing, it was found that the deuterated ratio of compound **3h'[1-D]** is 94%.

**<sup>1</sup>H NMR (500 MHz, CDCl<sub>3</sub>)**

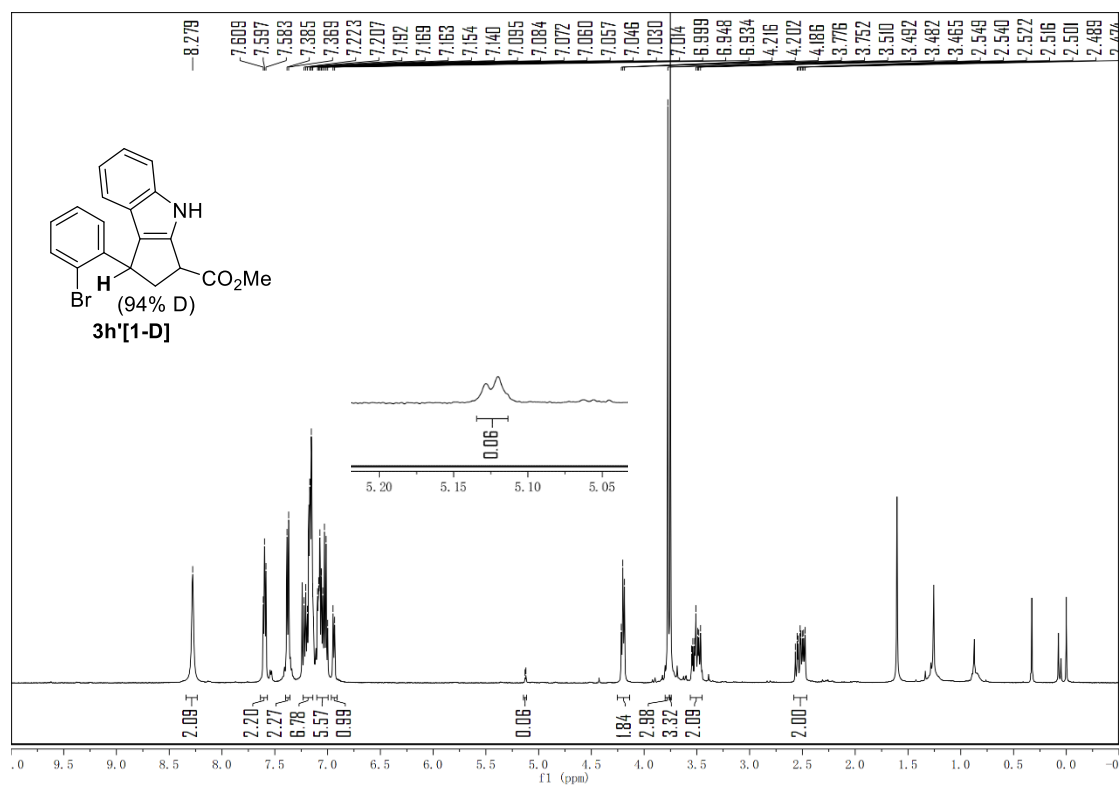

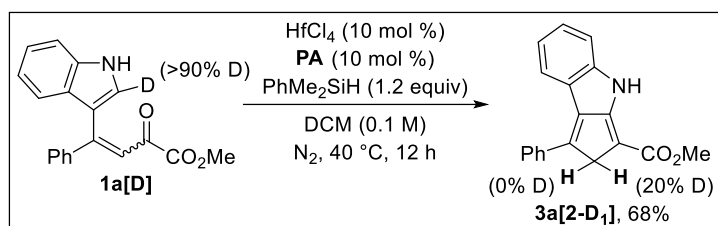

**F) 1a[D] replaces 1a as substrate under standard conditions:** To a 10 mL Schlenk tube equipped with a magnetic stir bar was added deuterated  $\gamma$ -indolyl  $\beta,\gamma$ -unsaturated- $\alpha$ -ketoester derivatives **1a[D]** (0.15 mmol, 1.0 equiv), HfCl<sub>4</sub> (0.015 mmol, 10 mol %) and diphenyl phosphate (0.015 mmol, 10 mol %). The resulting mixture was sealed and degassed via vacuum evacuation and subsequent backfill with nitrogen for three times. Then anhydrous DCM (1.5 mL, 0.1 M) and PhSiHMe<sub>2</sub> (0.18 mmol, 1.2 equiv) was added under nitrogen atmosphere. The reaction mixture was stirred at 40 °C for 12 h. After reaction, the mixture was concentrated under vacuum. Purification of mixture by column chromatography on silica gel (PE/EA = 4:1, v/v) to give the desired product **3a[2-D<sub>1</sub>]** (29.5 mg, 68% yield). Through NMR testing, it was found that the deuterated ratio of compound **3a[2-D<sub>1</sub>]** is 20%.

**<sup>1</sup>H NMR (500 MHz, DMSO-d<sub>6</sub>)**

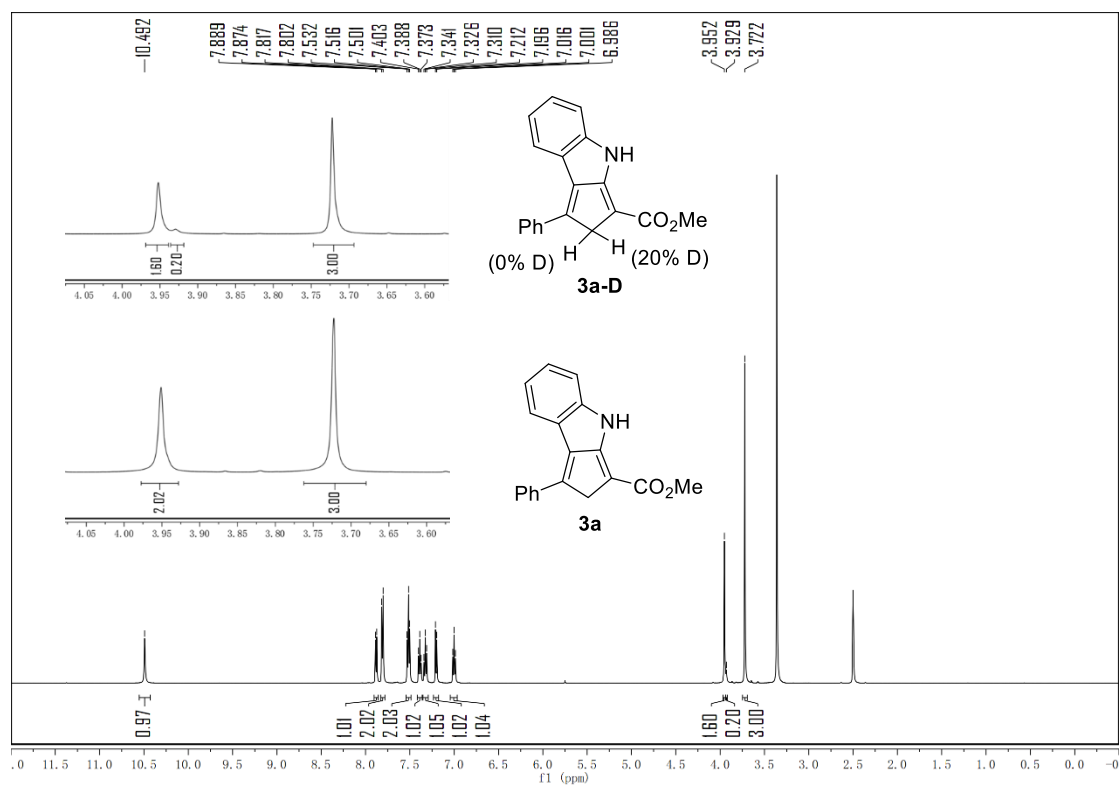

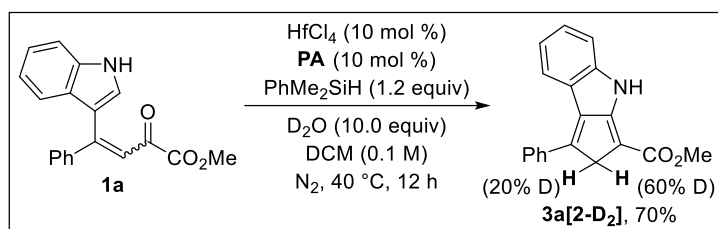

**G) Add additional deuterium water under standard conditions:** To a 10 mL Schlenk tube equipped with a magnetic stir bar was added  $\gamma$ -Indolyl  $\beta,\gamma$ -unsaturated- $\alpha$ -ketoester derivatives **1a** (0.15 mmol, 1.0 equiv),  $\text{HfCl}_4$  (0.015 mmol, 10 mol %) and diphenyl phosphate (0.015 mmol, 10 mol %). The resulting mixture was sealed and degassed via vacuum evacuation and subsequent backfill with nitrogen for three times. Then anhydrous DCM (1.5 mL, 0.1 M),  $\text{D}_2\text{O}$  (1.5 mmol, 10.0 equiv) and  $\text{PhSiHMe}_2$  (0.18 mmol, 1.2 equiv) was added under nitrogen atmosphere. The reaction mixture was stirred at 40 °C for 12 h. After reaction, the mixture was concentrated under vacuum. Purification of mixture by column chromatography on silica gel (PE/EA = 4:1, v/v) to give the desired product **3a[2-D<sub>2</sub>]** (30.5 mg, 70% yield). Through NMR testing, it was found that the deuterated ratio of compound **3a[2-D<sub>2</sub>]** is 60%.

**<sup>1</sup>H NMR (500 MHz, DMSO-d<sub>6</sub>)**

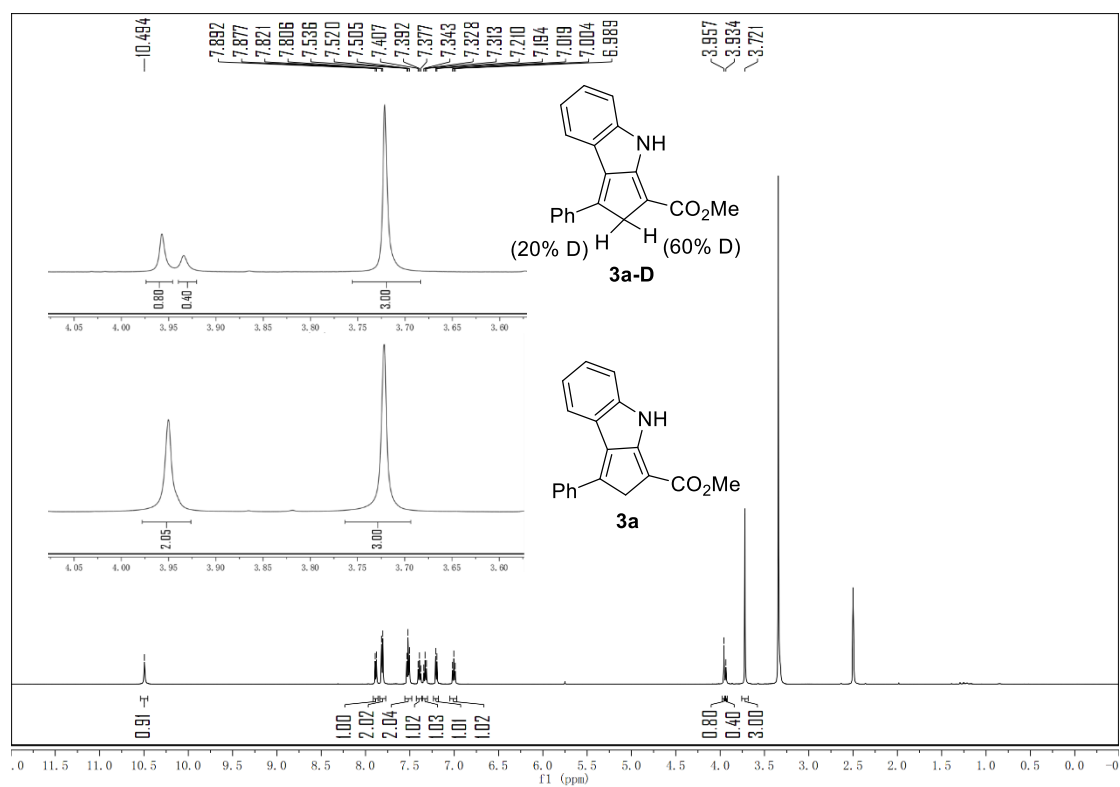

## VII. UV-vis Spectra of Hf(OTf)<sub>4</sub>/PA/1a

**UV-vis absorption spectra:** The UV/Vis absorption spectra of the reaction of **1a** (0.1 mmol), **PA** (0.1 mmol) and **Hf(OTf)<sub>4</sub>** (0.1 mmol) in CHCl<sub>3</sub> (2.0 mL) stirring for 5 min and 120 min were recorded in 1 cm path quartz cuvettes by using the UV-2600 UV-Vis spectrophotometer, respectively.

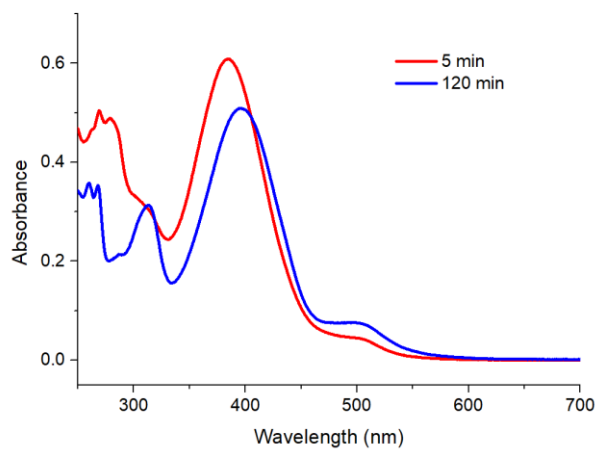

**Figure S4.** UV-vis spectra of Hf(OTf)<sub>4</sub>/PA/1a (1:1:1, 0.05 M)

## VIII. X-ray Structure

The crystal was cultivated from EtOH/DCM (1:1) with volatilization method.

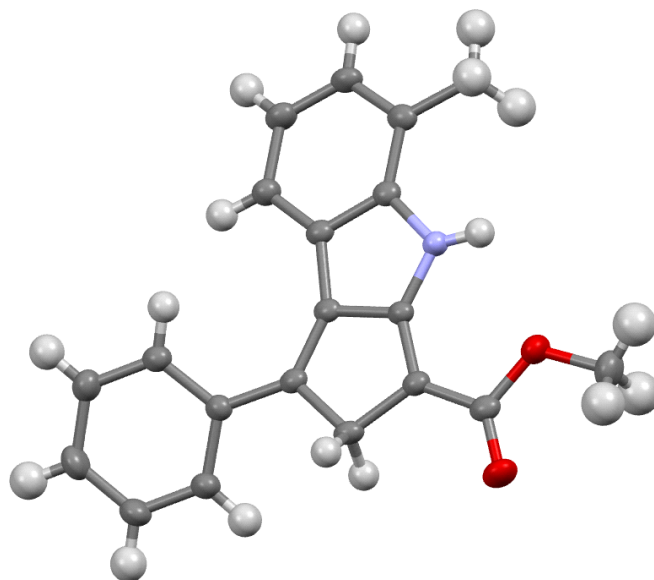

**Figure S5.** X-ray structure of compound **3v** (CCDC 2251334)



**Table S7** Crystal data and structure refinement for **3v**

|                                             |                                                 |                          |
|---------------------------------------------|-------------------------------------------------|--------------------------|
| Empirical formula                           | C <sub>20</sub> H <sub>17</sub> NO <sub>2</sub> |                          |
| Formula weight                              | 303.35                                          |                          |
| Temperature/K                               | 293(2) K                                        |                          |
| Crystal system                              | Triclinic                                       |                          |
| Space group                                 | P-1                                             |                          |
| a/Å                                         | 7.5526(9)                                       |                          |
| b/Å                                         | 10.6072(14)                                     |                          |
| c/Å                                         | 10.6696(14)                                     |                          |
| α/°                                         | 77.765(3)                                       |                          |
| β/°                                         | 84.820(4)                                       |                          |
| γ/°                                         | 69.886(2)                                       |                          |
| Volume/Å <sup>3</sup>                       | 784.26(17)                                      |                          |
| Z                                           | 2                                               |                          |
| ρ <sub>calc</sub> mg/m <sup>3</sup>         | 1.285                                           |                          |
| μ/mm <sup>-1</sup>                          | 0.083                                           |                          |
| F(000)                                      | 320                                             |                          |
| Crystal size/mm <sup>3</sup>                | 0.30 x 0.07 x 0.04                              |                          |
| Radiation                                   | radiation_wavelength                            | 0.71073                  |
|                                             | radiation_type                                  | MoK $\alpha$             |
|                                             | radiation_source                                | 'fine-focus sealed tube' |
|                                             | radiation_monochromator                         | graphite                 |
| 2θ range for data collection/°              | 1.95 to 25.00                                   |                          |
| Index ranges                                | -8<=h<=8, -12<=k<=11, -11<=l<=12                |                          |
| Reflections collected                       | 3795                                            |                          |
| Independent reflections                     | 2685 [R(int) = 0.0403]                          |                          |
| Data/restraints/parameters                  | 2685 / 0 / 210                                  |                          |
| Goodness-of-fit on F <sup>2</sup>           | 0.970                                           |                          |
| Final R indexes [I>=2σ (I)]                 | R1 = 0.0785, wR2 = 0.1980                       |                          |
| Final R indexes [all data]                  | R1 = 0.1176, wR2 = 0.2228                       |                          |
| Largest diff. peak/hole / e Å <sup>-3</sup> | 0.223 / -0.460                                  |                          |

The crystal was cultivated from acetone/CH<sub>3</sub>OH (2:1) with volatilization method.

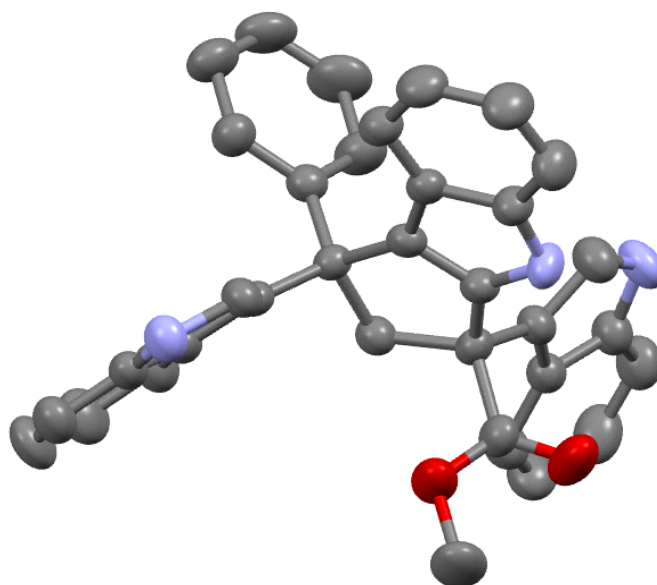

**Figure S6.** X-ray structure of compound *anti-7a* (CCDC 2323814)

**Table S8** Crystal data and structure refinement for *anti-7a*

|                                             |                                                               |
|---------------------------------------------|---------------------------------------------------------------|
| Empirical formula                           | C <sub>38</sub> H <sub>33</sub> N <sub>3</sub> O <sub>3</sub> |
| Formula weight                              | 579.67                                                        |
| Temperature/K                               | 298(2) K                                                      |
| Crystal system                              | Monoclinic                                                    |
| Space group                                 | C2/c                                                          |
| a/Å                                         | 20.385(2)                                                     |
| b/Å                                         | 8.8207(9)                                                     |
| c/Å                                         | 33.720(3)                                                     |
| α/°                                         | 90                                                            |
| β/°                                         | 98.974(3)                                                     |
| γ/°                                         | 90                                                            |
| Volume/Å <sup>3</sup>                       | 5988.9(10)                                                    |
| Z                                           | 8                                                             |
| ρ <sub>calc</sub> /cm <sup>3</sup>          | 1.286                                                         |
| μ/mm <sup>-1</sup>                          | 0.082                                                         |
| F(000)                                      | 2448                                                          |
| Crystal size/mm <sup>3</sup>                | 0.48 x 0.17 x 0.13                                            |
| Radiation                                   | MoKα(λ = 0.71073)                                             |
| 2θ range for data collection/°              | 2.19 to 25.01                                                 |
| Index ranges                                | -18 ≤ h ≤ 24, -10 ≤ k ≤ 10, -39 ≤ l ≤ 40                      |
| Reflections collected                       | 13983                                                         |
| Independent reflections                     | 5241 [R(int) = 0.0837]                                        |
| Data/restraints/parameters                  | 5241/0/ 401                                                   |
| Goodness-of-fit on F <sup>2</sup>           | 0.985                                                         |
| Final R indexes [I ≥ 2σ(I)]                 | R1 = 0.0667, wR2 = 0.1177                                     |
| Final R indexes [all data]                  | R1 = 0.1397, wR2 = 0.1370                                     |
| Largest diff. peak/hole / e Å <sup>-3</sup> | 0.361/-0.210                                                  |

## IX. Computational Data

The computations were performed using Gaussian16 program.<sup>4</sup> Initial geometry and transition structure optimizations were performed with the B3LYP functional<sup>5</sup> using def2-svp basis set<sup>6</sup> for all atoms except Hf atom. The SDD pseudopotentials and basis sets were, instead, employed for Hf atom.<sup>7</sup> SMD solvation model was used to account for the solvent dichloromethane.<sup>8</sup> Single point calculations were also carried out using B3LYP density functional with def2-tzvp basis set for H, C, O, N, Si, Cl and P atom<sup>9</sup>, the SDD basis and pseudopotentials<sup>7</sup> with an added f function with exponent 0.874 was used for Hf. Dispersion corrections<sup>10</sup> (EmpiricalDispersion=D3BJ in the Gaussian package) were also enclosed during the geometry optimization and single point calculations. The molecular orbitals were generated with Multiwfn<sup>11</sup> and VMD<sup>12</sup>.

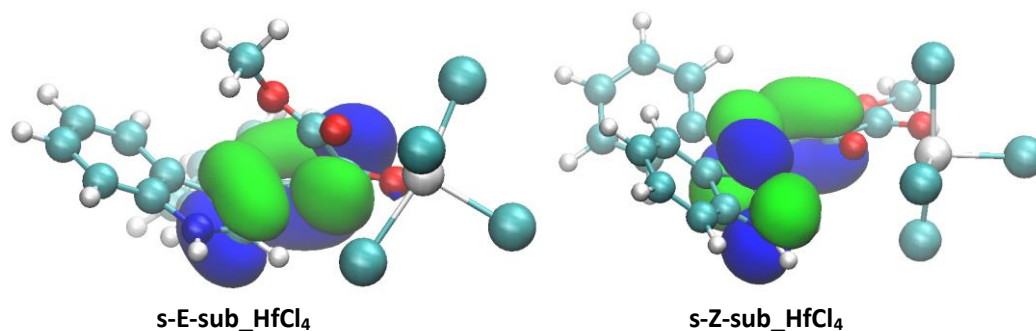

Figure S7. The molecular orbitals of pericyclic substrates (E and Z form)

Table S9. The energetic table for the key intermediates and transition states

| Name                                        | Lowest Imaginary Frequency | Electronic energies | Zero-point correction | Thermal correction to Energy | Thermal correction to Enthalpy | Thermal correction to Free Energy | Zero-point Energies |
|---------------------------------------------|----------------------------|---------------------|-----------------------|------------------------------|--------------------------------|-----------------------------------|---------------------|
| PA                                          |                            | -1106.68303         | 0.21043               | 0.225373                     | 0.226317                       | 0.165082                          | -1106.47            |
| PA anion                                    |                            | -1106.22249         | 0.199166              | 0.213386                     | 0.214331                       | 0.155357                          | -1106.02            |
| 1a                                          |                            | -1013.96972         | 0.297358              | 0.316844                     | 0.317788                       | 0.246364                          | -1013.67            |
| s-Z-sub_HfCl4                               |                            | -2903.34034         | 0.304719              | 0.332977                     | 0.333921                       | 0.241549                          | -2903.04            |
| s-E-sub_HfCl4                               |                            | -2903.3367          | 0.30408               | 0.332396                     | 0.33334                        | 0.2409                            | -2903.03            |
| TS1                                         | -258.341                   | -2903.31267         | 0.303294              | 0.330709                     | 0.331653                       | 0.242617                          | -2903.01            |
| TS1'                                        | -369.069                   | -2903.29853         | 0.302765              | 0.33048                      | 0.331424                       | 0.241211                          | -2903               |
| Int1                                        |                            | -2903.31581         | 0.304464              | 0.332152                     | 0.333097                       | 0.243217                          | -2903.01            |
| Int1'                                       |                            | -2903.30985         | 0.304681              | 0.332396                     | 0.33334                        | 0.242549                          | -2903.01            |
| Int2                                        |                            | -4010.02798         | 0.516513              | 0.560489                     | 0.561433                       | 0.430198                          | -4009.51            |
| TS2                                         | -1202.75                   | -4010.0117          | 0.510208              | 0.553611                     | 0.554555                       | 0.426572                          | -4009.5             |
| Int3                                        |                            | -4010.02882         | 0.516274              | 0.560109                     | 0.561053                       | 0.432198                          | -4009.51            |
| TS3                                         | -1245.08                   | -4010.01984         | 0.510191              | 0.553496                     | 0.554441                       | 0.427292                          | -4009.51            |
| Int4                                        |                            | -4010.05515         | 0.51817               | 0.561849                     | 0.562793                       | 0.433655                          | -4009.54            |
| Int4'                                       |                            | -2903.34253         | 0.305723              | 0.333268                     | 0.334212                       | 0.244763                          | -2903.04            |
| PhMe <sub>2</sub> SiH                       |                            | -601.794086         | 0.172618              | 0.182934                     | 0.183878                       | 0.136264                          | -601.621            |
| Int4'+PhMe <sub>2</sub> SiH                 |                            | -3505.1498          | 0.480226              | 0.519905                     | 0.520849                       | 0.403141                          | -3504.67            |
| TS4                                         | -466.007                   | -3505.13135         | 0.477696              | 0.516781                     | 0.517725                       | 0.402757                          | -3504.65            |
| Int5                                        |                            | -3505.19294         | 0.484472              | 0.523114                     | 0.524058                       | 0.410845                          | -3504.71            |
| TS5                                         | -243.134                   | -3505.17513         | 0.482294              | 0.520816                     | 0.52176                        | 0.409207                          | -3504.69            |
| Int6+PhMe <sub>2</sub> SiOHfCl <sub>4</sub> |                            | -3505.20809         | 0.481859              | 0.521447                     | 0.522391                       | 0.407321                          | -3504.73            |
| PhMe <sub>2</sub> SiOH                      |                            | -677.114686         | 0.178017              | 0.189937                     | 0.190881                       | 0.139913                          | -676.937            |
| Int6                                        |                            | -2045.39385         | 0.506253              | 0.540356                     | 0.541301                       | 0.434562                          | -2044.89            |
| TS6                                         | -453.849                   | -2045.38701         | 0.501851              | 0.535194                     | 0.536138                       | 0.433015                          | -2044.89            |
| 3a                                          |                            | -938.72297          | 0.293746              | 0.311463                     | 0.312408                       | 0.247254                          | -938.429            |

## The coordinates of intermediates and transition states:

### 1) PA

0 1

|   |             |             |             |
|---|-------------|-------------|-------------|
| P | -0.07452100 | 1.41955500  | 0.37391200  |
| O | -0.32593000 | 1.19905000  | 1.81696300  |
| O | -0.61051100 | 2.80430900  | -0.23047700 |
| H | -0.87994600 | 3.42243100  | 0.47342700  |
| O | 1.45655600  | 1.44978900  | -0.13803800 |
| O | -0.66325400 | 0.29541400  | -0.63080400 |
| C | 2.31128100  | 0.35325900  | -0.08990900 |
| C | 3.17880000  | 0.18470600  | -1.17002000 |
| C | 2.32581600  | -0.52461500 | 0.99771600  |
| C | 4.07872500  | -0.88383800 | -1.16036600 |
| H | 3.13650800  | 0.88945700  | -2.00255100 |
| C | 3.22597100  | -1.59468700 | 0.98861000  |
| H | 1.64557400  | -0.36575600 | 1.83557700  |
| C | 4.10355100  | -1.77776300 | -0.08433000 |
| H | 4.76100600  | -1.01913300 | -2.00307900 |
| H | 3.24095700  | -2.28581900 | 1.83489300  |
| H | 4.80598200  | -2.61434100 | -0.08194300 |
| C | -1.89720300 | -0.31386000 | -0.41415600 |
| C | -3.07475200 | 0.38467500  | -0.68523100 |
| C | -1.91747400 | -1.63186800 | 0.04087800  |
| C | -4.30085100 | -0.25979700 | -0.49667000 |
| H | -3.02189100 | 1.41498300  | -1.04166800 |
| C | -3.14970700 | -2.26608000 | 0.22176900  |
| H | -0.97442300 | -2.14177200 | 0.24691700  |
| C | -4.34138100 | -1.58307000 | -0.04497200 |
| H | -5.22872300 | 0.27753900  | -0.70715400 |
| H | -3.17663400 | -3.29918400 | 0.57646700  |
| H | -5.30213700 | -2.08260500 | 0.09936900  |

### 2) PA anion

|   |             |             |             |
|---|-------------|-------------|-------------|
| P | -0.09240500 | 1.55498200  | 0.24897300  |
| O | -0.16916600 | 1.25680600  | 1.71797900  |
| O | -0.63295400 | 2.80096600  | -0.37862200 |
| O | 1.47690800  | 1.40187600  | -0.32261800 |
| O | -0.65752700 | 0.19159200  | -0.58882300 |
| C | 2.30673500  | 0.34117800  | -0.12454200 |
| C | 3.41133900  | 0.23846500  | -0.98544200 |
| C | 2.11739900  | -0.62364700 | 0.87967800  |
| C | 4.31519800  | -0.81651000 | -0.84740100 |
| H | 3.53972400  | 0.99787200  | -1.76011900 |
| C | 3.02755900  | -1.67720800 | 1.00276200  |

|   |             |             |             |
|---|-------------|-------------|-------------|
| H | 1.26992400  | -0.51794500 | 1.55690100  |
| C | 4.12812500  | -1.78475700 | 0.14584900  |
| H | 5.17029400  | -0.88348600 | -1.52568800 |
| H | 2.87189600  | -2.42328000 | 1.78719100  |
| H | 4.83371000  | -2.61238300 | 0.25179500  |
| C | -1.90181200 | -0.31226200 | -0.38266300 |
| C | -3.02407600 | 0.51271600  | -0.19460600 |
| C | -2.05768200 | -1.70672400 | -0.38822500 |
| C | -4.28302300 | -0.06312700 | -0.00797700 |
| H | -2.88985800 | 1.59582500  | -0.20944100 |
| C | -3.32334700 | -2.27021700 | -0.21115800 |
| H | -1.17207500 | -2.32998800 | -0.53079800 |
| C | -4.44313900 | -1.45338300 | -0.01583900 |
| H | -5.15044200 | 0.58621800  | 0.13972000  |
| H | -3.43326300 | -3.35817600 | -0.21830200 |
| H | -5.43156100 | -1.89643800 | 0.12819800  |

### 3) 1a

|   |             |             |             |
|---|-------------|-------------|-------------|
| C | -2.68325300 | -0.04742300 | 0.06123500  |
| C | -3.91410500 | -0.96796500 | -0.14524200 |
| O | -2.86257300 | 1.14003300  | 0.28416500  |
| O | -5.05192900 | -0.28966800 | -0.04509400 |
| O | -3.84668000 | -2.15598000 | -0.37321700 |
| C | -6.25914800 | -1.03843600 | -0.22496300 |
| H | -7.08274000 | -0.32418500 | -0.10468900 |
| H | -6.29080700 | -1.48858400 | -1.22885500 |
| H | -6.33668200 | -1.83773100 | 0.52765900  |
| C | -1.41828800 | -0.75857300 | -0.02784600 |
| H | -1.50669800 | -1.83535100 | -0.16957300 |
| C | -0.16552500 | -0.21126500 | 0.09946800  |
| C | 0.06688700  | 1.25913600  | 0.15471000  |
| C | -0.25129400 | 2.07537600  | -0.94129800 |
| C | 0.67816600  | 1.83236300  | 1.27986300  |
| C | 0.04274400  | 3.43900700  | -0.91455800 |
| H | -0.72027000 | 1.63100600  | -1.82157800 |
| C | 0.95244000  | 3.20159000  | 1.31513500  |
| H | 0.94053500  | 1.19918000  | 2.13037200  |
| C | 0.64221500  | 4.00728900  | 0.21553800  |
| H | -0.19928400 | 4.06309900  | -1.77852900 |
| H | 1.41984300  | 3.63862800  | 2.20108200  |
| H | 0.86798500  | 5.07639200  | 0.23729900  |
| C | 3.16511900  | -1.89993700 | 0.12301100  |
| C | 2.40232300  | -0.71906900 | -0.11315100 |
| C | 3.07526000  | 0.42653500  | -0.58375000 |

|   |            |             |             |
|---|------------|-------------|-------------|
| C | 4.45297600 | 0.36889700  | -0.78055900 |
| C | 5.18604200 | -0.80941800 | -0.52366100 |
| C | 4.54985700 | -1.96249400 | -0.07141500 |
| C | 1.02200700 | -2.39664600 | 0.57451300  |
| C | 1.01395500 | -1.05600300 | 0.18208300  |
| H | 2.53199300 | 1.34687200  | -0.79443800 |
| H | 4.97854900 | 1.25607700  | -1.14240800 |
| H | 6.26643600 | -0.81876700 | -0.68701500 |
| H | 5.10390300 | -2.88370800 | 0.12176400  |
| H | 2.55331400 | -3.82715100 | 0.80904200  |
| H | 0.19447800 | -3.02019000 | 0.90650700  |
| N | 2.28837400 | -2.88406300 | 0.54169200  |

**4) s-Z-sub\_HfCl<sub>4</sub>**

|   |             |             |             |
|---|-------------|-------------|-------------|
| C | -0.02663100 | 1.32350600  | -0.16630700 |
| C | 1.07841500  | 2.35725600  | -0.19405400 |
| O | 0.43911600  | 0.15553200  | 0.08959700  |
| O | 0.76015700  | 3.60161400  | -0.35614400 |
| O | 2.24075800  | 1.94772800  | -0.07572200 |
| C | 1.82852000  | 4.58147000  | -0.41265300 |
| H | 1.33216400  | 5.54514100  | -0.56575200 |
| H | 2.38519600  | 4.57196400  | 0.53410800  |
| H | 2.49857700  | 4.34582900  | -1.25040800 |
| C | -1.33961700 | 1.69672200  | -0.39557400 |
| H | -1.50563700 | 2.76640000  | -0.51812000 |
| C | -2.49709400 | 0.86496100  | -0.34952700 |
| C | -3.78357700 | 1.54888200  | -0.11429600 |
| C | -3.87899600 | 2.60024600  | 0.81899300  |
| C | -4.92799700 | 1.18142700  | -0.85053500 |
| C | -5.09587400 | 3.24801200  | 1.02884700  |
| H | -3.00130300 | 2.88516800  | 1.40260100  |
| C | -6.13530000 | 1.84815700  | -0.65562700 |
| H | -4.85690300 | 0.38319700  | -1.59099300 |
| C | -6.22455200 | 2.87644700  | 0.29011700  |
| H | -5.16453800 | 4.04660400  | 1.77100900  |
| H | -7.01174000 | 1.56609500  | -1.24346000 |
| H | -7.17507900 | 3.39148300  | 0.44887500  |
| C | -2.93195400 | -2.80381400 | -0.49973700 |
| C | -3.41884000 | -1.55482700 | -0.03735900 |
| C | -4.55136500 | -1.54710700 | 0.79123100  |
| C | -5.16782400 | -2.76135700 | 1.10035300  |
| C | -4.67547700 | -3.98345600 | 0.60697400  |
| C | -3.53712700 | -4.02277500 | -0.20014800 |
| C | -1.48846600 | -1.25299100 | -1.25016400 |



|    |             |             |             |
|----|-------------|-------------|-------------|
| C  | -2.47598300 | -0.53709500 | -0.52154300 |
| H  | -4.95023500 | -0.61499900 | 1.19025700  |
| H  | -6.05288700 | -2.76128900 | 1.74070600  |
| H  | -5.18367900 | -4.91491600 | 0.86614100  |
| H  | -3.12905100 | -4.96373200 | -0.57363700 |
| H  | -1.22174900 | -3.26507400 | -1.71581400 |
| H  | -0.62990200 | -0.87455700 | -1.79853800 |
| N  | -1.77527100 | -2.55225600 | -1.24351500 |
| Hf | 2.53187800  | -0.32868100 | 0.13274800  |
| Cl | 4.93891700  | -0.01947900 | -0.00882600 |
| Cl | 2.20433600  | -2.71699100 | 0.34517800  |
| Cl | 2.27044000  | -0.33548600 | -2.34496500 |
| Cl | 2.45552200  | 0.11916500  | 2.55296300  |

5) s-E-sub\_HfCl<sub>4</sub>

|   |             |             |             |
|---|-------------|-------------|-------------|
| C | -0.12017000 | 0.99644600  | 0.05124800  |
| C | -0.04225600 | -0.27466900 | 0.89496100  |
| O | 1.04444700  | 1.41881100  | -0.24507500 |
| O | -1.04393200 | -0.60093500 | 1.64533700  |
| O | 1.04780400  | -0.86208800 | 0.91308200  |
| C | -0.92983000 | -1.78656300 | 2.47226000  |
| H | -1.90315400 | -1.89245000 | 2.96147800  |
| H | -0.71330400 | -2.65746000 | 1.83992700  |
| H | -0.12963200 | -1.64272000 | 3.21097800  |
| C | -1.30265800 | 1.68738300  | -0.25337900 |
| H | -1.19149100 | 2.75685500  | -0.44916700 |
| C | -2.55804000 | 1.07316000  | -0.38311700 |
| C | -3.78888500 | 1.86052200  | -0.25500900 |
| C | -3.82611000 | 2.99358000  | 0.58428100  |
| C | -4.94696500 | 1.50996800  | -0.97990700 |
| C | -4.99250000 | 3.74661500  | 0.70251600  |
| H | -2.94180200 | 3.26360500  | 1.16491100  |
| C | -6.10838700 | 2.26974100  | -0.86487100 |
| H | -4.92295400 | 0.64911000  | -1.64961700 |
| C | -6.13503900 | 3.38717300  | -0.02168600 |
| H | -5.01381300 | 4.61462200  | 1.36524000  |
| H | -6.99638700 | 1.99458700  | -1.43834200 |
| H | -7.04842400 | 3.97984100  | 0.07003500  |
| C | -2.95739300 | -2.59499800 | -0.72498000 |
| C | -3.49142600 | -1.36975300 | -0.24093200 |
| C | -4.61573900 | -1.40465700 | 0.60212400  |
| C | -5.18188200 | -2.63958200 | 0.91056400  |
| C | -4.64494200 | -3.84041000 | 0.40136800  |
| C | -3.51928400 | -3.83692900 | -0.42115100 |

|    |             |             |             |
|----|-------------|-------------|-------------|
| C  | -1.59432200 | -0.96866300 | -1.46486800 |
| C  | -2.59426000 | -0.32087800 | -0.70078900 |
| H  | -5.04108000 | -0.48450400 | 1.00424300  |
| H  | -6.06012900 | -2.68023700 | 1.55878800  |
| H  | -5.11524700 | -4.79143800 | 0.66158300  |
| H  | -3.08654800 | -4.76235800 | -0.80559700 |
| H  | -1.27304700 | -2.97035100 | -1.99863700 |
| H  | -0.79329900 | -0.53222200 | -2.05806300 |
| N  | -1.82316400 | -2.29417300 | -1.47377400 |
| Hf | 2.84343100  | 0.18063100  | -0.05690000 |
| Cl | 4.25562200  | -1.70835800 | 0.50352000  |
| Cl | 4.30191500  | 1.71810600  | -1.20695900 |
| Cl | 3.08973800  | 1.22771800  | 2.15784900  |
| Cl | 1.99857300  | -0.90583800 | -2.12400400 |

### 6) TS1

|   |             |             |             |
|---|-------------|-------------|-------------|
| C | 0.35550800  | -0.64402400 | -0.17550300 |
| C | 0.12396900  | 0.28872000  | 1.01402700  |
| O | -0.79705600 | -1.06225900 | -0.64288100 |
| O | 1.15022900  | 0.68339000  | 1.69503600  |
| O | -1.03729200 | 0.64328200  | 1.23535800  |
| C | 0.94992200  | 1.65345100  | 2.75580600  |
| H | 1.95407800  | 1.89457000  | 3.11900900  |
| H | 0.45414700  | 2.54540100  | 2.35131000  |
| H | 0.34053800  | 1.20400100  | 3.55111400  |
| C | 1.48297900  | -1.59514600 | -0.14523100 |
| H | 1.28084200  | -2.65322600 | 0.03381800  |
| C | 2.71967800  | -1.05644100 | -0.40498000 |
| C | 4.01230200  | -1.73874200 | -0.26107700 |
| C | 4.15758000  | -2.82591400 | 0.62164800  |
| C | 5.12328600  | -1.31970100 | -1.01673600 |
| C | 5.38491300  | -3.47641800 | 0.74240900  |
| H | 3.30946400  | -3.14819100 | 1.22927600  |
| C | 6.34997600  | -1.97252100 | -0.89285700 |
| H | 5.01771000  | -0.48882300 | -1.71753400 |
| C | 6.48374000  | -3.05169400 | -0.01321900 |
| H | 5.48757900  | -4.31478500 | 1.43527400  |
| H | 7.20349700  | -1.64118600 | -1.48882800 |
| H | 7.44510000  | -3.56152100 | 0.08544300  |
| C | 2.15744000  | 2.56340100  | -0.65252100 |
| C | 3.15507100  | 1.54648600  | -0.43625700 |
| C | 4.38288200  | 1.89228600  | 0.18392200  |
| C | 4.59636900  | 3.21083000  | 0.53114300  |
| C | 3.60573600  | 4.20428500  | 0.28926900  |

|    |             |             |             |
|----|-------------|-------------|-------------|
| C  | 2.38479800  | 3.90316700  | -0.29103500 |
| C  | 1.21180700  | 0.61583500  | -1.29939900 |
| C  | 2.54815300  | 0.32173200  | -0.79624600 |
| H  | 5.13958200  | 1.12967200  | 0.36973100  |
| H  | 5.53735600  | 3.50523300  | 0.99988900  |
| H  | 3.81588400  | 5.23701300  | 0.57763700  |
| H  | 1.62315100  | 4.66577400  | -0.46014400 |
| H  | 0.20713000  | 2.48225400  | -1.50424500 |
| H  | 0.81609400  | 0.15244900  | -2.20706000 |
| N  | 1.03344000  | 1.99027400  | -1.17020500 |
| Hf | -2.68540900 | -0.30910400 | -0.07945500 |
| Cl | -4.30725700 | 1.07329400  | 1.11703400  |
| Cl | -3.99948300 | -1.54789400 | -1.68651800 |
| Cl | -2.74398800 | -2.04832200 | 1.67239000  |
| Cl | -2.19400700 | 1.58657300  | -1.64887900 |

### 7) TS1'

|   |             |             |             |
|---|-------------|-------------|-------------|
| C | -0.52081400 | -1.01317500 | 0.54408800  |
| C | 0.48920700  | -1.87333100 | 1.28321100  |
| O | 0.09642800  | -0.16000800 | -0.23330200 |
| O | 0.01204400  | -2.78385600 | 2.07167900  |
| O | 1.69169400  | -1.66906400 | 1.09151500  |
| C | 0.94738500  | -3.64725400 | 2.76980500  |
| H | 0.32878700  | -4.34919900 | 3.33813800  |
| H | 1.57416100  | -4.17558800 | 2.03903100  |
| H | 1.57218000  | -3.04140500 | 3.43986000  |
| C | -1.81390700 | -1.63663200 | 0.16814600  |
| H | -1.85870000 | -2.68375600 | -0.13954100 |
| C | -2.88120500 | -0.78670100 | 0.25573800  |
| C | -4.23290600 | -0.99356900 | -0.27287700 |
| C | -4.47242400 | -1.93914100 | -1.28909100 |
| C | -5.31440000 | -0.24760700 | 0.23321700  |
| C | -5.76242400 | -2.13630900 | -1.77861200 |
| H | -3.63881300 | -2.50465800 | -1.71043900 |
| C | -6.60356500 | -0.44448200 | -0.26236500 |
| H | -5.14245200 | 0.48266900  | 1.02695600  |
| C | -6.83097200 | -1.38986200 | -1.26765500 |
| H | -5.93513400 | -2.86842200 | -2.57088000 |
| H | -7.43461200 | 0.13952100  | 0.13983600  |
| H | -7.84042100 | -1.54259500 | -1.65704100 |
| C | -1.29569400 | 2.33881500  | 1.33223300  |
| C | -2.40911400 | 1.77313100  | 0.61695000  |
| C | -3.10292000 | 2.56177600  | -0.33675900 |
| C | -2.69602200 | 3.86612800  | -0.52811400 |

|    |             |             |             |
|----|-------------|-------------|-------------|
| C  | -1.59610100 | 4.40885500  | 0.19643200  |
| C  | -0.88231200 | 3.66541100  | 1.12155100  |
| C  | -1.38260800 | 0.17545100  | 1.92876300  |
| C  | -2.44109800 | 0.40549500  | 0.96467200  |
| H  | -3.93932700 | 2.13895300  | -0.89495000 |
| H  | -3.21578400 | 4.49872100  | -1.25042300 |
| H  | -1.30265100 | 5.44419200  | 0.00752700  |
| H  | -0.02710700 | 4.07861800  | 1.65754700  |
| H  | 0.06173100  | 1.51803600  | 2.72865300  |
| H  | -1.42692500 | -0.55959900 | 2.73409600  |
| N  | -0.75722700 | 1.38042300  | 2.14268300  |
| Hf | 2.20215800  | -0.02674900 | -0.46299700 |
| Cl | 4.57973200  | -0.56737200 | -0.26842500 |
| Cl | 2.11391200  | 1.83378500  | -2.00098900 |
| Cl | 2.39067600  | 1.38683000  | 1.58550900  |
| Cl | 1.93805100  | -1.82565800 | -2.14353900 |

### 8) Int1

|   |             |             |             |
|---|-------------|-------------|-------------|
| C | -0.37920700 | 0.43412200  | -0.21400300 |
| C | -0.07067900 | -0.25141000 | 1.13229800  |
| O | 0.79292500  | 0.83933500  | -0.75125200 |
| O | -1.08274200 | -0.62413100 | 1.85053100  |
| O | 1.10697100  | -0.44896200 | 1.42837400  |
| C | -0.82762500 | -1.36667600 | 3.07121000  |
| H | -1.81531500 | -1.58191500 | 3.49184700  |
| H | -0.29275100 | -2.29482600 | 2.82912000  |
| H | -0.23295100 | -0.75017500 | 3.75824200  |
| C | -1.44411700 | 1.49818200  | -0.11617900 |
| H | -1.17479100 | 2.52490200  | 0.13726500  |
| C | -2.70740400 | 1.03421000  | -0.37329500 |
| C | -3.96819200 | 1.78104600  | -0.25971300 |
| C | -4.07224300 | 2.88592600  | 0.60572300  |
| C | -5.08483200 | 1.40897100  | -1.03017700 |
| C | -5.26696000 | 3.59925900  | 0.69706500  |
| H | -3.21825600 | 3.17349100  | 1.22244800  |
| C | -6.27852700 | 2.12615300  | -0.93717100 |
| H | -5.01057300 | 0.56390600  | -1.71803900 |
| C | -6.37283200 | 3.22161200  | -0.07307200 |
| H | -5.33825000 | 4.45069900  | 1.37788700  |
| H | -7.13719500 | 1.83103000  | -1.54471300 |
| H | -7.30851100 | 3.78081300  | 0.00198100  |
| C | -2.22664200 | -2.61155900 | -0.53470200 |
| C | -3.23525000 | -1.57001100 | -0.42589500 |
| C | -4.54595800 | -1.90045100 | 0.02465800  |

|    |             |             |             |
|----|-------------|-------------|-------------|
| C  | -4.82868000 | -3.21559200 | 0.30556200  |
| C  | -3.83137800 | -4.23065600 | 0.16189200  |
| C  | -2.54132900 | -3.95690400 | -0.24666500 |
| C  | -1.18105500 | -0.67121100 | -1.09237300 |
| C  | -2.58012500 | -0.36956500 | -0.70300000 |
| H  | -5.30160800 | -1.12180100 | 0.12878400  |
| H  | -5.82677700 | -3.50223200 | 0.64161300  |
| H  | -4.10459200 | -5.26374600 | 0.39053800  |
| H  | -1.78688100 | -4.73902600 | -0.34134300 |
| H  | -0.19320400 | -2.58922900 | -1.12640200 |
| H  | -0.93332300 | -0.38200600 | -2.12634300 |
| N  | -1.03955900 | -2.07542900 | -0.88190900 |
| Hf | 2.67717100  | 0.29826400  | -0.12841700 |
| Cl | 4.37128600  | -0.80031100 | 1.27682500  |
| Cl | 3.93139200  | 1.19570500  | -1.99623400 |
| Cl | 2.78637000  | 2.34294900  | 1.26058100  |
| Cl | 2.22368800  | -1.92948800 | -1.23986100 |

**9) Int1'**

|   |             |             |             |
|---|-------------|-------------|-------------|
| C | -0.44584400 | -0.63552900 | 0.78372400  |
| C | 0.55177900  | -1.40070900 | 1.65779300  |
| O | 0.25941500  | -0.07182300 | -0.25007500 |
| O | 0.05563000  | -2.04177000 | 2.67116200  |
| O | 1.74745300  | -1.38453100 | 1.36242600  |
| C | 0.96117700  | -2.79246800 | 3.52157400  |
| H | 0.32939900  | -3.24941200 | 4.29018200  |
| H | 1.47176400  | -3.56088100 | 2.92594200  |
| H | 1.69439300  | -2.10915400 | 3.97086600  |
| C | -1.60385900 | -1.51157400 | 0.31437300  |
| H | -1.44675400 | -2.53982000 | -0.01488200 |
| C | -2.79097600 | -0.83602100 | 0.28242600  |
| C | -4.07472500 | -1.31530500 | -0.25070700 |
| C | -4.11284200 | -2.32235000 | -1.23319500 |
| C | -5.28585700 | -0.78520200 | 0.22962300  |
| C | -5.33438600 | -2.78575700 | -1.72045000 |
| H | -3.18029000 | -2.72772300 | -1.63102200 |
| C | -6.50698500 | -1.25265300 | -0.25900100 |
| H | -5.26897300 | -0.01230400 | 1.00109700  |
| C | -6.53437000 | -2.25328000 | -1.23509500 |
| H | -5.35076300 | -3.56164600 | -2.48947200 |
| H | -7.44037600 | -0.83530400 | 0.12584800  |
| H | -7.48999200 | -2.61644300 | -1.62071300 |
| C | -1.67822200 | 2.60680400  | 0.90152500  |
| C | -2.82803300 | 1.81265800  | 0.46896000  |

|    |             |             |             |
|----|-------------|-------------|-------------|
| C  | -3.87345700 | 2.43382000  | -0.28179500 |
| C  | -3.77221700 | 3.77246100  | -0.55724700 |
| C  | -2.64045000 | 4.53676800  | -0.11508500 |
| C  | -1.60033500 | 3.98750200  | 0.60081800  |
| C  | -1.24602500 | 0.47997700  | 1.56689400  |
| C  | -2.52129200 | 0.49991300  | 0.79004000  |
| H  | -4.72746000 | 1.84501300  | -0.61689300 |
| H  | -4.55625100 | 4.27760500  | -1.12399700 |
| H  | -2.60578500 | 5.60013200  | -0.36467800 |
| H  | -0.74047800 | 4.57750600  | 0.92025400  |
| H  | 0.17065000  | 2.11438100  | 1.77346700  |
| H  | -1.42004900 | 0.14476400  | 2.60470700  |
| N  | -0.78281900 | 1.83538000  | 1.52648500  |
| Hf | 2.28892100  | -0.06554500 | -0.48113100 |
| Cl | 4.65454800  | -0.57011300 | -0.00265500 |
| Cl | 2.37285100  | 1.49126100  | -2.33845300 |
| Cl | 2.42212800  | 1.74774300  | 1.29745700  |
| Cl | 2.12458500  | -2.13503700 | -1.83010400 |

#### 10) Int2

|   |             |             |             |
|---|-------------|-------------|-------------|
| C | 0.19596900  | -1.24251300 | -0.32570900 |
| C | -0.32988000 | -2.68075100 | -0.21947000 |
| O | -0.84836700 | -0.46486300 | -0.75167600 |
| O | 0.54303100  | -3.60461700 | 0.01754000  |
| O | -1.54439300 | -2.87114400 | -0.30569100 |
| C | 0.07547100  | -4.96120900 | 0.24433900  |
| H | 0.97848300  | -5.54858000 | 0.43918700  |
| H | -0.59723100 | -4.97445200 | 1.11223600  |
| H | -0.44533900 | -5.32382700 | -0.65163900 |
| C | 1.45755000  | -1.09112200 | -1.13784800 |
| H | 1.40547200  | -0.94674800 | -2.21782700 |
| C | 2.59728000  | -1.13618900 | -0.38090000 |
| C | 3.98551800  | -1.09318200 | -0.85936400 |
| C | 4.30083500  | -1.44513300 | -2.18518800 |
| C | 5.01817900  | -0.67227100 | -0.00284500 |
| C | 5.61874900  | -1.38634000 | -2.63613000 |
| H | 3.51203500  | -1.78464500 | -2.85945200 |
| C | 6.33695000  | -0.62063500 | -0.45531400 |
| H | 4.78405600  | -0.35814500 | 1.01562800  |
| C | 6.64132800  | -0.97899900 | -1.77142000 |
| H | 5.85148800  | -1.66776900 | -3.66571400 |
| H | 7.12781100  | -0.28560600 | 0.21958500  |
| H | 7.67398200  | -0.93813100 | -2.12594600 |
| C | 1.34038700  | -2.15558500 | 2.93512200  |

|    |             |             |             |
|----|-------------|-------------|-------------|
| C  | 2.54517100  | -2.02937600 | 2.13157800  |
| C  | 3.73479400  | -2.70075400 | 2.53822300  |
| C  | 3.71477200  | -3.41649400 | 3.71118000  |
| C  | 2.52916300  | -3.49593000 | 4.50711800  |
| C  | 1.34665500  | -2.88360800 | 4.14464700  |
| C  | 0.76601100  | -0.88576900 | 1.14083600  |
| C  | 2.17609400  | -1.30173500 | 0.99804100  |
| H  | 4.63704500  | -2.63437400 | 1.93035500  |
| H  | 4.61306300  | -3.93425400 | 4.05227300  |
| H  | 2.56372300  | -4.07060300 | 5.43592700  |
| H  | 0.44498900  | -2.96006100 | 4.75380300  |
| H  | -0.60544100 | -1.35536500 | 2.73685800  |
| H  | 0.64212300  | 0.22288600  | 1.18683700  |
| N  | 0.30943300  | -1.53701600 | 2.32537300  |
| Hf | -2.87420500 | -1.03284400 | -0.73334200 |
| Cl | -4.83379800 | -2.46730000 | -0.46040000 |
| Cl | -3.73932100 | 1.17643700  | -1.18143400 |
| Cl | -2.63780300 | -1.67669100 | -3.10574200 |
| Cl | -2.78811100 | -0.68408100 | 1.75351700  |
| P  | 0.18209600  | 2.72491700  | -0.37070900 |
| O  | 0.49296100  | 2.04574100  | 0.92043700  |
| O  | -0.07554400 | 1.80643400  | -1.62950100 |
| H  | -0.42764600 | 0.89665900  | -1.34880000 |
| O  | -1.09704700 | 3.70424100  | -0.32971600 |
| O  | 1.32735200  | 3.75425400  | -0.87904300 |
| C  | -1.51290800 | 4.33862700  | 0.83873500  |
| C  | -0.76913900 | 5.39674600  | 1.36269400  |
| C  | -2.69663700 | 3.90811100  | 1.43757200  |
| C  | -1.22754900 | 6.03708200  | 2.51786100  |
| H  | 0.15051400  | 5.71020800  | 0.86508600  |
| C  | -3.14538600 | 4.55957400  | 2.58994400  |
| H  | -3.24509300 | 3.07358700  | 0.99762500  |
| C  | -2.41375300 | 5.62194000  | 3.13231500  |
| H  | -0.65330000 | 6.86719500  | 2.93644900  |
| H  | -4.07192900 | 4.23029100  | 3.06648800  |
| H  | -2.76848400 | 6.12679700  | 4.03390100  |
| C  | 2.64007000  | 3.31463500  | -1.05009200 |
| C  | 3.01981000  | 2.75245600  | -2.26983400 |
| C  | 3.55021600  | 3.47316400  | -0.00431500 |
| C  | 4.34940600  | 2.35931300  | -2.44889400 |
| H  | 2.27767800  | 2.63354800  | -3.06056300 |
| C  | 4.87736700  | 3.07969400  | -0.19767100 |
| H  | 3.21188800  | 3.90262000  | 0.94027400  |
| C  | 5.27942300  | 2.52717400  | -1.41825400 |

|   |            |            |             |
|---|------------|------------|-------------|
| H | 4.65809400 | 1.91884500 | -3.39947700 |
| H | 5.59961300 | 3.20347500 | 0.61288900  |
| H | 6.31580700 | 2.21851100 | -1.56387500 |

### 11) TS2

|    |             |             |             |
|----|-------------|-------------|-------------|
| C  | -0.08016100 | -1.37637100 | -0.15651900 |
| C  | -0.86467600 | -2.60789400 | 0.31516900  |
| O  | -0.99843700 | -0.54472000 | -0.78677500 |
| O  | -0.17993900 | -3.58099900 | 0.81827200  |
| O  | -2.09756800 | -2.59423500 | 0.23950000  |
| C  | -0.89511600 | -4.72186700 | 1.36035300  |
| H  | -1.54510700 | -4.38872600 | 2.18047700  |
| H  | -1.48960100 | -5.19410400 | 0.56693100  |
| H  | -0.11960400 | -5.40186400 | 1.72726000  |
| C  | 1.11745800  | -1.72925800 | -1.01959600 |
| H  | 0.99689600  | -1.90052900 | -2.08946200 |
| C  | 2.28585300  | -1.70909600 | -0.31793400 |
| C  | 3.63281400  | -1.98732600 | -0.83658400 |
| C  | 3.81447700  | -2.80989200 | -1.96462000 |
| C  | 4.76114000  | -1.40179300 | -0.23581300 |
| C  | 5.09217300  | -3.04191100 | -2.47251800 |
| H  | 2.94924300  | -3.28264900 | -2.43394800 |
| C  | 6.03957300  | -1.64062300 | -0.74241700 |
| H  | 4.63489200  | -0.72782000 | 0.61251400  |
| C  | 6.20972400  | -2.46138700 | -1.86063400 |
| H  | 5.21891200  | -3.68677200 | -3.34537800 |
| H  | 6.90490300  | -1.17257500 | -0.26782200 |
| H  | 7.21064300  | -2.64920100 | -2.25664700 |
| C  | 1.26239200  | -1.22590600 | 3.22968200  |
| C  | 2.39704000  | -1.54233900 | 2.39356400  |
| C  | 3.59190100  | -2.01109100 | 2.99670700  |
| C  | 3.64483300  | -2.10926000 | 4.37322800  |
| C  | 2.53135700  | -1.74626400 | 5.18179600  |
| C  | 1.34150600  | -1.29969200 | 4.63517700  |
| C  | 0.63337900  | -0.81680200 | 1.10999000  |
| C  | 1.95913200  | -1.33262600 | 1.06223600  |
| H  | 4.44979800  | -2.28618100 | 2.38308400  |
| H  | 4.55586300  | -2.46665400 | 4.85768000  |
| H  | 2.62001000  | -1.83010300 | 6.26772700  |
| H  | 0.48663100  | -1.03041400 | 5.25786900  |
| H  | -0.66636800 | -0.46683100 | 2.77652900  |
| H  | 0.79971300  | 0.54724900  | 0.79117800  |
| N  | 0.20482200  | -0.87995100 | 2.44613800  |
| Hf | -3.10365600 | -0.73531500 | -0.63115200 |



|    |             |             |             |
|----|-------------|-------------|-------------|
| Cl | -5.28013000 | -1.64942200 | -0.01567400 |
| Cl | -3.54700800 | 1.42967300  | -1.59689600 |
| Cl | -3.08691200 | -1.95158500 | -2.77543600 |
| Cl | -2.82413900 | 0.19053500  | 1.69818500  |
| P  | 0.57212800  | 2.32743200  | -0.80675100 |
| O  | 0.92880800  | 1.69985100  | 0.54844000  |
| O  | 0.12631300  | 1.32860800  | -1.90741600 |
| H  | -0.39970100 | 0.49650300  | -1.50443300 |
| O  | -0.57497400 | 3.42020100  | -0.66588600 |
| O  | 1.80341000  | 3.17287400  | -1.37677300 |
| C  | -0.70663700 | 4.25984500  | 0.45223300  |
| C  | -0.06161300 | 5.49427800  | 0.44719200  |
| C  | -1.50644900 | 3.84012400  | 1.51272900  |
| C  | -0.23164900 | 6.34062200  | 1.54733800  |
| H  | 0.55538900  | 5.78056900  | -0.40618800 |
| C  | -1.66594200 | 4.69766300  | 2.60505700  |
| H  | -1.98591400 | 2.86015500  | 1.47992100  |
| C  | -1.03195100 | 5.94496500  | 2.62420600  |
| H  | 0.26427500  | 7.31399800  | 1.55880100  |
| H  | -2.29127300 | 4.38525100  | 3.44473400  |
| H  | -1.16251600 | 6.61089500  | 3.48028300  |
| C  | 3.07773000  | 2.60751400  | -1.54952200 |
| C  | 3.31285400  | 1.75412000  | -2.62714400 |
| C  | 4.07982200  | 2.95406000  | -0.64626300 |
| C  | 4.60118300  | 1.24275600  | -2.80589000 |
| H  | 2.50019600  | 1.50305200  | -3.31003500 |
| C  | 5.36534100  | 2.44060400  | -0.84281500 |
| H  | 3.84717000  | 3.61811600  | 0.18809000  |
| C  | 5.62690100  | 1.58830400  | -1.92043100 |
| H  | 4.80067600  | 0.56669700  | -3.64014700 |
| H  | 6.16371900  | 2.70762000  | -0.14659900 |
| H  | 6.63068400  | 1.18534900  | -2.06689300 |

## 12) Int3

|   |             |            |            |
|---|-------------|------------|------------|
| C | -0.54284200 | 1.23705700 | 0.66191400 |
| C | -1.57691200 | 2.19218900 | 1.26191600 |
| O | -1.30652000 | 0.19466800 | 0.07143200 |
| O | -1.11104400 | 3.22223100 | 1.88087100 |
| O | -2.78389000 | 1.95355600 | 1.13326300 |
| C | -2.05092600 | 4.17247400 | 2.45155300 |
| H | -1.43165100 | 4.95905000 | 2.89402600 |
| H | -2.69150200 | 4.57546400 | 1.65591800 |
| H | -2.65726200 | 3.67081800 | 3.21746500 |
| C | 0.44510600  | 0.77562000 | 1.74209700 |

|    |             |             |             |
|----|-------------|-------------|-------------|
| H  | 0.11051800  | 0.22727500  | 2.62242100  |
| C  | 1.70047200  | 1.26898800  | 1.49025800  |
| C  | 2.88540900  | 1.03726400  | 2.33030800  |
| C  | 2.77073500  | 0.97252100  | 3.73141000  |
| C  | 4.14161700  | 0.81818000  | 1.73610900  |
| C  | 3.89054700  | 0.70384100  | 4.51854100  |
| H  | 1.80198600  | 1.15334800  | 4.20159400  |
| C  | 5.25700500  | 0.53806200  | 2.52633500  |
| H  | 4.23800300  | 0.83010200  | 0.65127400  |
| C  | 5.13580500  | 0.48483300  | 3.91846300  |
| H  | 3.79244300  | 0.66728500  | 5.60607300  |
| H  | 6.22203600  | 0.35575200  | 2.04883400  |
| H  | 6.01133500  | 0.27201700  | 4.53671800  |
| C  | 1.53829500  | 3.08158100  | -1.80537600 |
| C  | 2.45485700  | 2.74667500  | -0.74727600 |
| C  | 3.79085000  | 3.18182300  | -0.85229400 |
| C  | 4.18321500  | 3.89241500  | -1.98179200 |
| C  | 3.27183100  | 4.18573000  | -3.02080000 |
| C  | 1.94015700  | 3.78785400  | -2.94528800 |
| C  | 0.38701100  | 1.94788200  | -0.28727500 |
| C  | 1.67616100  | 1.99869100  | 0.20775000  |
| H  | 4.50882700  | 2.96490800  | -0.06121900 |
| H  | 5.21857600  | 4.23018300  | -2.07005100 |
| H  | 3.61628200  | 4.74078400  | -3.89655100 |
| H  | 1.22835000  | 4.01825900  | -3.74062400 |
| H  | -0.55486800 | 2.63960400  | -2.05537700 |
| H  | 1.40764400  | -0.86526100 | 1.03242300  |
| N  | 0.28177300  | 2.58915400  | -1.47785500 |
| Hf | -3.53136900 | 0.22573500  | -0.09311400 |
| Cl | -5.85307900 | 0.85975600  | 0.03668900  |
| Cl | -3.48417100 | -1.75458100 | -1.46104600 |
| Cl | -3.54143900 | -0.96532900 | 2.05393600  |
| Cl | -3.08138100 | 1.79006100  | -1.98255400 |
| P  | 1.44875000  | -1.79098200 | -0.95243400 |
| O  | 1.76928100  | -1.68154500 | 0.59848500  |
| O  | 0.17655100  | -1.13122900 | -1.39838700 |
| H  | -0.71122000 | -0.38892700 | -0.55292600 |
| O  | 2.66783100  | -1.21467400 | -1.80250100 |
| O  | 1.54021100  | -3.36326800 | -1.24238200 |
| C  | 4.01660800  | -1.15212100 | -1.45000700 |
| C  | 4.63817500  | -2.15459300 | -0.70562300 |
| C  | 4.71146600  | -0.02627300 | -1.88978600 |
| C  | 5.99048400  | -2.00633800 | -0.38243200 |
| H  | 4.08321400  | -3.03440100 | -0.37919500 |

|   |             |             |             |
|---|-------------|-------------|-------------|
| C | 6.06347700  | 0.10378000  | -1.56488300 |
| H | 4.18686100  | 0.73613100  | -2.46584300 |
| C | 6.70487300  | -0.88166100 | -0.80655800 |
| H | 6.48519200  | -2.78172200 | 0.20687400  |
| H | 6.61146700  | 0.98743200  | -1.89979400 |
| H | 7.76067100  | -0.77455100 | -0.54818800 |
| C | 0.69543900  | -4.29633700 | -0.61877200 |
| C | -0.68997500 | -4.13327300 | -0.63955800 |
| C | 1.29852200  | -5.39370100 | -0.00742400 |
| C | -1.48759500 | -5.09660900 | -0.01461200 |
| H | -1.13915300 | -3.27202200 | -1.13358200 |
| C | 0.48668400  | -6.35356800 | 0.60373800  |
| H | 2.38584900  | -5.48766500 | -0.01514600 |
| C | -0.90460600 | -6.20555200 | 0.60622100  |
| H | -2.57298000 | -4.97213600 | -0.02123000 |
| H | 0.94838300  | -7.21899700 | 1.08489300  |
| H | -1.53390500 | -6.95590900 | 1.09007900  |

### 13) TS3

|   |             |             |             |
|---|-------------|-------------|-------------|
| C | 0.11221500  | -1.44541200 | -0.41247700 |
| C | -0.58565600 | -2.76783800 | -0.75661200 |
| O | -0.90538900 | -0.52709300 | -0.13140400 |
| O | 0.17598900  | -3.77185400 | -1.04402000 |
| O | -1.81960900 | -2.81618700 | -0.75230500 |
| C | -0.44984100 | -5.04055600 | -1.37088200 |
| H | 0.37781300  | -5.73140800 | -1.56060600 |
| H | -1.05828900 | -5.37957800 | -0.52178900 |
| H | -1.07482400 | -4.92118800 | -2.26601100 |
| C | 1.08486100  | -1.05978900 | -1.55514400 |
| H | 0.79805200  | -1.24049300 | -2.59596400 |
| C | 2.41411000  | -1.22175700 | -1.09910200 |
| C | 3.58969800  | -1.04823700 | -1.95234800 |
| C | 3.56651000  | -1.45528600 | -3.30110000 |
| C | 4.74116300  | -0.41545800 | -1.44630500 |
| C | 4.68024200  | -1.25444300 | -4.11446700 |
| H | 2.68105500  | -1.95165800 | -3.70191900 |
| C | 5.84412500  | -0.19669700 | -2.27015300 |
| H | 4.75164400  | -0.05098000 | -0.42043000 |
| C | 5.81988100  | -0.62333100 | -3.60208700 |
| H | 4.66005600  | -1.58906600 | -5.15405300 |
| H | 6.72445100  | 0.31247100  | -1.87166800 |
| H | 6.68892000  | -0.46059500 | -4.24414300 |
| C | 2.27963800  | -1.79562200 | 2.58574200  |
| C | 3.22112800  | -1.62611500 | 1.51634200  |

|    |             |             |             |
|----|-------------|-------------|-------------|
| C  | 4.59220500  | -1.64675200 | 1.82416200  |
| C  | 4.98578800  | -1.80717100 | 3.15134400  |
| C  | 4.04021700  | -1.94789700 | 4.18697800  |
| C  | 2.67250800  | -1.94838100 | 3.91710900  |
| C  | 1.08710100  | -1.60543900 | 0.72501900  |
| C  | 2.41431500  | -1.47700400 | 0.31953100  |
| H  | 5.34271800  | -1.54288200 | 1.04091400  |
| H  | 6.05061800  | -1.82223000 | 3.39499000  |
| H  | 4.38347100  | -2.06571000 | 5.21734300  |
| H  | 1.93196300  | -2.06723600 | 4.71039400  |
| H  | 0.11105800  | -1.86840000 | 2.56782600  |
| H  | -0.44526700 | 0.66738900  | 0.31794100  |
| N  | 0.98810300  | -1.77862000 | 2.05184700  |
| Hf | -2.96779100 | -1.00084500 | 0.02004400  |
| Cl | -5.03693700 | -2.28835000 | -0.01615800 |
| Cl | -3.54752200 | 1.14183800  | 0.95568200  |
| Cl | -3.20961100 | -0.32094200 | -2.33806700 |
| Cl | -2.35790200 | -1.99181400 | 2.25940300  |
| P  | 0.55024100  | 2.42337000  | -0.60823100 |
| O  | -0.01029600 | 1.61831100  | 0.59310200  |
| O  | 1.09965200  | 1.56917600  | -1.75963300 |
| H  | 1.09619400  | 0.41348300  | -1.64948800 |
| O  | -0.53218700 | 3.40647700  | -1.23092800 |
| O  | 1.66962400  | 3.42126300  | -0.04805900 |
| C  | -1.57185400 | 4.04526000  | -0.53986200 |
| C  | -2.83809900 | 3.97704500  | -1.11458700 |
| C  | -1.33435500 | 4.73027600  | 0.65037600  |
| C  | -3.90106100 | 4.61788200  | -0.47466900 |
| H  | -2.98070800 | 3.41385700  | -2.03812200 |
| C  | -2.41124200 | 5.35723700  | 1.28492000  |
| H  | -0.32951200 | 4.77745100  | 1.07323400  |
| C  | -3.69180300 | 5.30437300  | 0.72596900  |
| H  | -4.90059300 | 4.56573500  | -0.91226500 |
| H  | -2.24133900 | 5.89291100  | 2.22177300  |
| H  | -4.52784200 | 5.79685400  | 1.22753600  |
| C  | 2.90460800  | 2.94890900  | 0.43045800  |
| C  | 4.04189900  | 3.20676100  | -0.33128900 |
| C  | 2.96625600  | 2.27344300  | 1.64919600  |
| C  | 5.28247400  | 2.77885800  | 0.15034800  |
| H  | 3.94559300  | 3.73118100  | -1.28332900 |
| C  | 4.21264600  | 1.84218800  | 2.11229400  |
| H  | 2.05472100  | 2.08824300  | 2.21842600  |
| C  | 5.36937600  | 2.09526800  | 1.36773700  |
| H  | 6.18292700  | 2.97635900  | -0.43550700 |

|   |            |            |            |
|---|------------|------------|------------|
| H | 4.27521500 | 1.30321200 | 3.05945500 |
| H | 6.33945000 | 1.75380700 | 1.73553700 |

**14) Int4**

|    |             |             |             |
|----|-------------|-------------|-------------|
| C  | -0.03783500 | -1.62362700 | 0.48460200  |
| C  | 0.74282600  | -2.88168500 | 0.89012500  |
| O  | 0.89849500  | -0.63547100 | 0.21522300  |
| O  | 0.03872500  | -3.93075900 | 1.16793400  |
| O  | 1.97273500  | -2.83473400 | 0.93423800  |
| C  | 0.73397300  | -5.14636800 | 1.55689400  |
| H  | -0.05269500 | -5.88833700 | 1.72675200  |
| H  | 1.40324000  | -5.46072800 | 0.74497900  |
| H  | 1.30570100  | -4.96174800 | 2.47601600  |
| C  | -1.09357500 | -1.23525800 | 1.57338600  |
| H  | -1.04795900 | -1.86482500 | 2.47446200  |
| C  | -2.45433100 | -1.32619800 | 0.92297000  |
| C  | -3.65496100 | -1.01128200 | 1.66009300  |
| C  | -3.59016800 | -0.12593900 | 2.76205800  |
| C  | -4.90110000 | -1.57536300 | 1.30405600  |
| C  | -4.74446200 | 0.19234200  | 3.47084700  |
| H  | -2.64642200 | 0.35663200  | 3.01673000  |
| C  | -6.04604800 | -1.26624300 | 2.02995400  |
| H  | -4.95480100 | -2.29285200 | 0.48595000  |
| C  | -5.97095900 | -0.37737300 | 3.11031300  |
| H  | -4.69064100 | 0.89490000  | 4.30512100  |
| H  | -7.00138000 | -1.72036000 | 1.75865500  |
| H  | -6.87367600 | -0.12844200 | 3.67338500  |
| C  | -1.96988400 | -2.03660200 | -2.65798500 |
| C  | -3.00574400 | -1.82854300 | -1.69872700 |
| C  | -4.32765000 | -1.74849900 | -2.15156300 |
| C  | -4.58114800 | -1.88282800 | -3.51968700 |
| C  | -3.54203200 | -2.09378800 | -4.44060100 |
| C  | -2.21099800 | -2.17211500 | -4.02069800 |
| C  | -0.93838500 | -1.86252300 | -0.69669700 |
| C  | -2.32074600 | -1.70473500 | -0.41219100 |
| H  | -5.14987600 | -1.57212400 | -1.46038500 |
| H  | -5.61019500 | -1.81820200 | -3.87957500 |
| H  | -3.77464800 | -2.19496000 | -5.50287400 |
| H  | -1.39319700 | -2.32624300 | -4.72657800 |
| H  | 0.20228000  | -2.12070200 | -2.41514800 |
| H  | 0.31890300  | 0.75205200  | -0.13825000 |
| N  | -0.72938000 | -2.04986000 | -1.98624800 |
| Hf | 2.97155300  | -0.91661000 | 0.13304500  |
| Cl | 5.12666000  | -2.05949700 | 0.26584600  |

|    |             |             |             |
|----|-------------|-------------|-------------|
| Cl | 3.45032500  | 1.21223700  | -0.88420000 |
| Cl | 3.10892900  | -0.15462600 | 2.47029600  |
| Cl | 2.52677500  | -2.07011500 | -2.09037500 |
| P  | -0.57605500 | 2.50813100  | 0.86342700  |
| O  | -0.11506200 | 1.63885800  | -0.37586900 |
| O  | -0.89656200 | 1.79236800  | 2.12700000  |
| H  | -0.88639000 | -0.19984700 | 1.89296100  |
| O  | 0.53020100  | 3.64840600  | 1.11823700  |
| O  | -1.79549900 | 3.39068700  | 0.24933300  |
| C  | 1.33249600  | 4.27326600  | 0.17059200  |
| C  | 2.68551700  | 4.40645000  | 0.48341400  |
| C  | 0.81003600  | 4.77520200  | -1.02299800 |
| C  | 3.53237200  | 5.05506200  | -0.41753300 |
| H  | 3.05901900  | 3.98876300  | 1.41978900  |
| C  | 1.67162000  | 5.41277800  | -1.92110100 |
| H  | -0.25301500 | 4.67307500  | -1.24225100 |
| C  | 3.03034100  | 5.55580200  | -1.62354800 |
| H  | 4.59369200  | 5.15702500  | -0.17863700 |
| H  | 1.27082900  | 5.80393000  | -2.85946800 |
| H  | 3.69685300  | 6.05594800  | -2.32995900 |
| C  | -2.98481600 | 2.77400000  | -0.13777800 |
| C  | -4.03398000 | 2.68784400  | 0.77743800  |
| C  | -3.10764000 | 2.27715500  | -1.43707200 |
| C  | -5.23630000 | 2.09775700  | 0.37676000  |
| H  | -3.89717700 | 3.07593000  | 1.78767100  |
| C  | -4.31449600 | 1.68963700  | -1.82540200 |
| H  | -2.26320100 | 2.34965400  | -2.12370000 |
| C  | -5.37901800 | 1.59891500  | -0.92160500 |
| H  | -6.06022900 | 2.02004500  | 1.08893200  |
| H  | -4.41869900 | 1.29521100  | -2.83809700 |
| H  | -6.31904600 | 1.13494800  | -1.22871000 |

**15) Int4'**

|   |             |             |             |
|---|-------------|-------------|-------------|
| C | 0.39622900  | -0.38754200 | 0.02176500  |
| C | -0.14608500 | -0.64797800 | 1.44540700  |
| O | -0.68295900 | -0.27164900 | -0.81067800 |
| O | 0.73271600  | -0.84973500 | 2.37619600  |
| O | -1.36365700 | -0.64780600 | 1.62014700  |
| C | 0.26342200  | -1.09724300 | 3.72786700  |
| H | 1.16832800  | -1.22476400 | 4.33092300  |
| H | -0.34914900 | -2.00866400 | 3.74188400  |
| H | -0.32326100 | -0.23674300 | 4.07647700  |
| C | 1.44146400  | -1.48744400 | -0.37597500 |
| H | 1.23346200  | -1.75097900 | -1.42529600 |

|    |             |             |             |
|----|-------------|-------------|-------------|
| C  | 2.81173200  | -0.84808800 | -0.26916900 |
| C  | 4.02022200  | -1.63454100 | -0.34238800 |
| C  | 3.98852700  | -2.93744700 | -0.89390600 |
| C  | 5.24401900  | -1.13779000 | 0.16234400  |
| C  | 5.15044800  | -3.69900000 | -0.96571700 |
| H  | 3.05544100  | -3.34174500 | -1.28815800 |
| C  | 6.39831700  | -1.91072800 | 0.10370300  |
| H  | 5.27074900  | -0.16014000 | 0.64065100  |
| C  | 6.35602800  | -3.18845400 | -0.46860400 |
| H  | 5.11944200  | -4.69696700 | -1.40783200 |
| H  | 7.33450700  | -1.52206000 | 0.50970800  |
| H  | 7.26518100  | -3.79224400 | -0.51988900 |
| C  | 2.30859600  | 2.79714500  | -0.02213600 |
| C  | 3.34947000  | 1.82700400  | -0.13898400 |
| C  | 4.66537100  | 2.28022100  | -0.29659000 |
| C  | 4.90844800  | 3.65711200  | -0.31429300 |
| C  | 3.86579100  | 4.58729500  | -0.17971500 |
| C  | 2.53990900  | 4.16754700  | -0.03550900 |
| C  | 1.28615700  | 0.82539900  | 0.02363100  |
| C  | 2.67052400  | 0.52971600  | -0.11172500 |
| H  | 5.49437500  | 1.58304700  | -0.41311600 |
| H  | 5.93289100  | 4.01507900  | -0.43682600 |
| H  | 4.09023900  | 5.65601200  | -0.19449100 |
| H  | 1.71785100  | 4.87952900  | 0.05558100  |
| H  | 0.13796100  | 2.55030300  | 0.15648300  |
| N  | 1.07226700  | 2.12455300  | 0.07984000  |
| Hf | -2.64729200 | -0.13985800 | -0.26246000 |
| Cl | -4.58398400 | -0.05227500 | 1.25328400  |
| Cl | -3.55524500 | 0.46972900  | -2.42390400 |
| Cl | -2.12820200 | 2.26239400  | 0.42298300  |
| Cl | -2.90954400 | -2.58346300 | -0.52362100 |
| H  | 1.35939200  | -2.40791200 | 0.21817800  |

#### 16) PhMe<sub>2</sub>SiH

|    |             |             |             |
|----|-------------|-------------|-------------|
| Si | -1.65489900 | -0.19042700 | -0.36966200 |
| C  | 0.22032400  | -0.04771900 | -0.17725300 |
| C  | 0.83494300  | 1.14500200  | 0.24707900  |
| C  | 1.04760900  | -1.15951400 | -0.43207700 |
| C  | 2.22186300  | 1.22553900  | 0.41483800  |
| H  | 0.22651000  | 2.03030400  | 0.45175000  |
| C  | 2.43328800  | -1.08555000 | -0.26690700 |
| H  | 0.60524000  | -2.10268400 | -0.76920400 |
| C  | 3.02381600  | 0.10972700  | 0.15845700  |
| H  | 2.67747700  | 2.16280400  | 0.74551900  |

|   |             |             |             |
|---|-------------|-------------|-------------|
| H | 3.05547700  | -1.96083100 | -0.47222000 |
| H | 4.10761200  | 0.17078300  | 0.28776500  |
| C | -2.34867400 | -1.31784700 | 0.97138400  |
| H | -2.15999000 | -0.88875300 | 1.97001700  |
| H | -1.87872900 | -2.31470600 | 0.93694300  |
| H | -3.43780400 | -1.44984700 | 0.85542600  |
| C | -2.46312600 | 1.50647400  | -0.29706500 |
| H | -2.05762500 | 2.18439200  | -1.06601200 |
| H | -2.31150300 | 1.97581500  | 0.68936800  |
| H | -3.55031000 | 1.41924700  | -0.46133900 |
| H | -1.92803200 | -0.81721700 | -1.70348500 |

**17) Int4'+PhMe<sub>2</sub>SiH**

|   |             |             |             |
|---|-------------|-------------|-------------|
| C | -0.45112700 | -1.21988700 | -0.08017800 |
| C | -1.54137600 | -2.21796800 | 0.36503800  |
| O | -1.08286800 | -0.05782600 | -0.43321500 |
| O | -1.14336700 | -3.40364900 | 0.70422200  |
| O | -2.71275900 | -1.84245900 | 0.37396100  |
| C | -2.13961400 | -4.37085000 | 1.12932600  |
| H | -1.57804300 | -5.27833100 | 1.37388300  |
| H | -2.84532000 | -4.55548200 | 0.30842000  |
| H | -2.67041100 | -3.98748400 | 2.01106900  |
| C | 0.45520800  | -1.85734600 | -1.19272500 |
| H | 0.61915300  | -1.06626100 | -1.94225400 |
| C | 1.77463700  | -2.20669300 | -0.53616600 |
| C | 2.77578800  | -2.99541800 | -1.21413300 |
| C | 2.74101400  | -3.13098700 | -2.62222500 |
| C | 3.78750600  | -3.66607800 | -0.48861500 |
| C | 3.70928500  | -3.88278900 | -3.28009800 |
| H | 1.96783100  | -2.62367300 | -3.20070600 |
| C | 4.74155100  | -4.43076200 | -1.15102000 |
| H | 3.79148000  | -3.61839100 | 0.59973700  |
| C | 4.71048400  | -4.53255100 | -2.54768600 |
| H | 3.68507400  | -3.96670100 | -4.36855600 |
| H | 5.51051000  | -4.95530200 | -0.57999000 |
| H | 5.46568800  | -5.12737900 | -3.06694300 |
| C | 1.90981500  | -0.37220800 | 2.65343100  |
| C | 2.71761800  | -1.19529900 | 1.81190100  |
| C | 4.07433100  | -1.34041400 | 2.12613000  |
| C | 4.57941900  | -0.68652400 | 3.25438800  |
| C | 3.75747400  | 0.10588200  | 4.07176000  |
| C | 2.40100500  | 0.27862700  | 3.77911500  |
| C | 0.57393400  | -1.02145500 | 1.00140800  |
| C | 1.83401400  | -1.61894000 | 0.72492500  |



|    |             |             |             |
|----|-------------|-------------|-------------|
| H  | 4.73711100  | -1.94100600 | 1.50405500  |
| H  | 5.63749800  | -0.79359000 | 3.50261600  |
| H  | 4.18353400  | 0.60205500  | 4.94638300  |
| H  | 1.75453600  | 0.90549200  | 4.39541300  |
| H  | -0.19204300 | 0.21908600  | 2.47870500  |
| N  | 0.60701800  | -0.31617700 | 2.11420200  |
| Hf | -3.05043700 | 0.40701300  | -0.16174000 |
| Cl | -5.38205100 | 0.04213900  | 0.53365400  |
| Cl | -2.94361100 | 2.76625200  | -0.69326300 |
| Cl | -2.45145800 | 0.74859600  | 2.29675600  |
| Cl | -3.55011600 | -0.36140400 | -2.45908800 |
| H  | -0.00640600 | -2.71126400 | -1.70674000 |
| Si | 1.51793300  | 2.25440700  | -0.65215400 |
| H  | 1.89166700  | 0.82574100  | -0.43899900 |
| C  | 3.15527200  | 3.19622000  | -0.77392000 |
| C  | 3.38816100  | 4.17662900  | -1.75570000 |
| C  | 4.18126700  | 2.94266600  | 0.15819300  |
| C  | 4.59674600  | 4.88063800  | -1.80519400 |
| H  | 2.61587300  | 4.39849900  | -2.49787300 |
| C  | 5.39060000  | 3.64174600  | 0.11489300  |
| H  | 4.03725500  | 2.18299300  | 0.93354500  |
| C  | 5.60046100  | 4.61468100  | -0.86911300 |
| H  | 4.75514200  | 5.63873800  | -2.57704400 |
| H  | 6.17280700  | 3.42740700  | 0.84826300  |
| H  | 6.54543600  | 5.16313800  | -0.90618600 |
| C  | 0.57571500  | 2.87931500  | 0.85163100  |
| H  | 1.21437200  | 2.84596300  | 1.74989200  |
| H  | -0.32922600 | 2.28679700  | 1.04380100  |
| H  | 0.26939800  | 3.92750300  | 0.69630100  |
| C  | 0.53405100  | 2.41619800  | -2.24297900 |
| H  | 1.14129500  | 2.12768100  | -3.11711100 |
| H  | 0.17984500  | 3.44883700  | -2.39521600 |
| H  | -0.34728300 | 1.75953400  | -2.19948500 |

**18) TS4**

|   |             |             |            |
|---|-------------|-------------|------------|
| C | -0.60480300 | 0.71603500  | 1.11308900 |
| C | -1.80142600 | 1.15174700  | 1.96329300 |
| O | -1.08180000 | -0.16407700 | 0.15856600 |
| O | -1.55803500 | 1.95945200  | 2.94861700 |
| O | -2.92170500 | 0.72478200  | 1.67748500 |
| C | -2.67085900 | 2.39432300  | 3.77197000 |
| H | -2.23712400 | 3.07219900  | 4.51437600 |
| H | -3.13054900 | 1.52331100  | 4.25811500 |
| H | -3.40939800 | 2.91567600  | 3.14828200 |

|    |             |             |             |
|----|-------------|-------------|-------------|
| C  | 0.54903400  | 0.09493400  | 1.95853800  |
| H  | 0.41146900  | -0.98805900 | 2.05963900  |
| C  | 1.83437000  | 0.49663900  | 1.22736300  |
| C  | 3.15537100  | 0.13221500  | 1.77672200  |
| C  | 3.41151400  | -1.18965400 | 2.18716200  |
| C  | 4.16925800  | 1.09667400  | 1.90219200  |
| C  | 4.66121000  | -1.54272100 | 2.68771700  |
| H  | 2.63204600  | -1.94789900 | 2.08882400  |
| C  | 5.41797300  | 0.74239000  | 2.41637300  |
| H  | 3.97214100  | 2.13079100  | 1.62172700  |
| C  | 5.67034800  | -0.57782300 | 2.79827400  |
| H  | 4.85492600  | -2.57586800 | 2.98385700  |
| H  | 6.19707200  | 1.50161000  | 2.51502300  |
| H  | 6.65296300  | -0.85763800 | 3.18531000  |
| C  | 0.95620600  | 3.29556700  | -1.04406800 |
| C  | 2.08413700  | 2.61817400  | -0.47991200 |
| C  | 3.36587300  | 2.93112100  | -0.96209800 |
| C  | 3.49387800  | 3.89634400  | -1.96133200 |
| C  | 2.36945700  | 4.56107500  | -2.48716700 |
| C  | 1.08219300  | 4.27002000  | -2.03445900 |
| C  | 0.13998700  | 1.83887000  | 0.42631400  |
| C  | 1.52799300  | 1.68789500  | 0.48622300  |
| H  | 4.24953200  | 2.42673500  | -0.57119400 |
| H  | 4.48724100  | 4.14170000  | -2.34379900 |
| H  | 2.50534500  | 5.31403600  | -3.26680100 |
| H  | 0.20377000  | 4.77213300  | -2.44420300 |
| H  | -1.16327700 | 2.96898000  | -0.76915000 |
| N  | -0.20758300 | 2.78535500  | -0.45811700 |
| Hf | -3.02806700 | -0.58971400 | -0.24433900 |
| Cl | -5.48051300 | -0.54784500 | 0.01969400  |
| Cl | -2.63047800 | -1.82964700 | -2.29282500 |
| Cl | -3.17256500 | 1.66443600  | -1.39144500 |
| Cl | -2.87936500 | -2.55320700 | 1.26976900  |
| H  | 0.58889800  | 0.53867300  | 2.96501400  |
| Si | 1.70923800  | -1.51092900 | -1.09046700 |
| H  | 1.75318100  | -0.56413300 | 0.17943600  |
| C  | 3.53903400  | -1.87207500 | -1.20523200 |
| C  | 4.06420500  | -3.14648800 | -0.91700300 |
| C  | 4.44000000  | -0.82071900 | -1.46929400 |
| C  | 5.44429000  | -3.36425100 | -0.89658500 |
| H  | 3.39059800  | -3.98025600 | -0.70283600 |
| C  | 5.81919000  | -1.03303500 | -1.43901300 |
| H  | 4.06171700  | 0.18075700  | -1.69093300 |
| C  | 6.32319500  | -2.30624600 | -1.14997400 |

|   |             |             |             |
|---|-------------|-------------|-------------|
| H | 5.83591000  | -4.36048400 | -0.67602200 |
| H | 6.50379400  | -0.20458100 | -1.63742900 |
| H | 7.40288700  | -2.47396900 | -1.12313400 |
| C | 1.04317400  | -0.37233100 | -2.40829300 |
| H | 0.81716800  | -0.95326600 | -3.31878300 |
| H | 1.77282700  | 0.40949800  | -2.66740700 |
| H | 0.11398000  | 0.10012600  | -2.06049000 |
| C | 0.67556000  | -2.98672300 | -0.62081400 |
| H | 1.18478400  | -3.60295100 | 0.13633200  |
| H | 0.48546300  | -3.61386300 | -1.50859800 |
| H | -0.29297700 | -2.66482700 | -0.21493000 |

### 19) Int5

|   |             |             |             |
|---|-------------|-------------|-------------|
| C | -0.28851200 | 0.49250000  | -0.11142400 |
| C | 0.34851400  | 1.78911400  | 0.37266200  |
| O | 0.80231200  | -0.40962000 | -0.44391800 |
| O | -0.48868300 | 2.70047600  | 0.73552800  |
| O | 1.57356300  | 1.95600300  | 0.39733800  |
| C | 0.01915700  | 3.98518100  | 1.18222000  |
| H | -0.87043500 | 4.58190600  | 1.40682500  |
| H | 0.60941400  | 4.44477000  | 0.37848000  |
| H | 0.63600900  | 3.84213400  | 2.07929000  |
| C | -1.24333500 | 0.82437900  | -1.31777300 |
| H | -0.94753100 | 0.20367500  | -2.16994700 |
| C | -2.72731000 | 0.53632600  | -0.87845000 |
| C | -3.62670600 | 1.75226100  | -1.01407000 |
| C | -4.32754000 | 1.96577100  | -2.21027400 |
| C | -3.75101400 | 2.69569200  | 0.01683000  |
| C | -5.12660000 | 3.10024500  | -2.37953200 |
| H | -4.24547900 | 1.23069500  | -3.01602300 |
| C | -4.55103700 | 3.82977800  | -0.14841900 |
| H | -3.21808400 | 2.53729200  | 0.95604900  |
| C | -5.24002100 | 4.03763900  | -1.34794900 |
| H | -5.66633600 | 3.25008000  | -3.31824500 |
| H | -4.64052600 | 4.55331100  | 0.66624700  |
| H | -5.86737800 | 4.92337800  | -1.47584600 |
| C | -2.37163600 | -0.93669600 | 2.59599100  |
| C | -3.32387600 | -0.55710300 | 1.58737900  |
| C | -4.69098200 | -0.81540400 | 1.80267500  |
| C | -5.08038300 | -1.42781100 | 2.98965000  |
| C | -4.12939800 | -1.79028500 | 3.97128200  |
| C | -2.76900200 | -1.55320400 | 3.79001000  |
| C | -1.24218800 | -0.05259500 | 0.89552400  |
| C | -2.55411200 | 0.00427200  | 0.51349700  |

|    |             |             |             |
|----|-------------|-------------|-------------|
| H  | -5.42863300 | -0.54040100 | 1.04571300  |
| H  | -6.13797100 | -1.63444700 | 3.17071800  |
| H  | -4.46921400 | -2.26930300 | 4.89289000  |
| H  | -2.03532100 | -1.83848800 | 4.54702400  |
| H  | -0.22842600 | -0.75442800 | 2.63963200  |
| N  | -1.10401000 | -0.60874700 | 2.14516200  |
| Hf | 2.99777700  | 0.30632300  | 0.06645700  |
| Cl | 4.77208900  | 1.75728900  | 0.77916500  |
| Cl | 4.24012300  | -1.73712800 | -0.27658100 |
| Cl | 2.30083900  | -0.34734000 | 2.36203200  |
| Cl | 3.01608800  | 1.00040200  | -2.27826000 |
| H  | -1.11961900 | 1.86806900  | -1.63201600 |
| Si | 0.49233200  | -2.10603700 | -0.98291400 |
| H  | -3.13569400 | -0.24980100 | -1.53056700 |
| C  | -1.30388400 | -2.42388800 | -1.41911000 |
| C  | -1.76523500 | -2.27976300 | -2.74221800 |
| C  | -2.19260400 | -2.94734000 | -0.46185300 |
| C  | -3.07423900 | -2.62274600 | -3.09127400 |
| H  | -1.09864700 | -1.89190600 | -3.51633300 |
| C  | -3.50197700 | -3.29066700 | -0.80475100 |
| H  | -1.86691200 | -3.08018800 | 0.57155500  |
| C  | -3.94641500 | -3.12560400 | -2.12037800 |
| H  | -3.41346400 | -2.49824800 | -4.12261800 |
| H  | -4.17799300 | -3.68208900 | -0.04105300 |
| H  | -4.97143400 | -3.39243700 | -2.39009100 |
| C  | 0.97482100  | -3.18613400 | 0.45527200  |
| H  | 0.74251900  | -4.23165400 | 0.19118500  |
| H  | 0.40793700  | -2.92763400 | 1.36152900  |
| H  | 2.04718000  | -3.12170200 | 0.68137700  |
| C  | 1.52305000  | -2.31978400 | -2.51891900 |
| H  | 1.30196200  | -3.31966900 | -2.92950100 |
| H  | 2.60074700  | -2.26611700 | -2.32127900 |
| H  | 1.27065600  | -1.57074900 | -3.28444500 |

20) TS5

|   |             |             |             |
|---|-------------|-------------|-------------|
| C | 0.47546300  | 0.85793600  | 0.16909700  |
| C | -0.44534600 | 2.04554700  | 0.06071000  |
| O | -0.99527400 | -0.51450000 | 0.41706400  |
| O | 0.22513200  | 3.12082200  | -0.21832300 |
| O | -1.65756200 | 2.05182300  | 0.25448300  |
| C | -0.49835100 | 4.37935600  | -0.31683300 |
| H | 0.26057000  | 5.12495700  | -0.57337700 |
| H | -0.96645500 | 4.60680000  | 0.65003100  |
| H | -1.25956400 | 4.30011800  | -1.10411200 |

|    |             |             |             |
|----|-------------|-------------|-------------|
| C  | 1.37693800  | 0.83300200  | 1.39712300  |
| H  | 0.95004100  | 0.16110500  | 2.15415500  |
| C  | 2.79002800  | 0.35711500  | 0.91565600  |
| C  | 3.89348200  | 1.37844300  | 1.15099000  |
| C  | 5.01388800  | 1.03111800  | 1.91561500  |
| C  | 3.81950500  | 2.66613300  | 0.59743600  |
| C  | 6.04505700  | 1.95327700  | 2.12692600  |
| H  | 5.07843100  | 0.02918100  | 2.34762600  |
| C  | 4.84598500  | 3.58814500  | 0.80925300  |
| H  | 2.95068300  | 2.94782600  | -0.00273300 |
| C  | 5.96365200  | 3.23380800  | 1.57448200  |
| H  | 6.91351700  | 1.66798500  | 2.72602900  |
| H  | 4.77573400  | 4.58792700  | 0.37322800  |
| H  | 6.76802600  | 3.95527700  | 1.73787000  |
| C  | 2.24086100  | -0.32987200 | -2.75986900 |
| C  | 3.22145400  | -0.36807900 | -1.70029600 |
| C  | 4.53227500  | -0.82138400 | -1.97424800 |
| C  | 4.83387100  | -1.23076700 | -3.26152000 |
| C  | 3.85413500  | -1.19416000 | -4.28862300 |
| C  | 2.55794400  | -0.74929000 | -4.06040300 |
| C  | 1.23447200  | 0.37863300  | -0.91280600 |
| C  | 2.54729300  | 0.06835400  | -0.53318600 |
| H  | 5.27954000  | -0.85063100 | -1.17935300 |
| H  | 5.83775800  | -1.58888300 | -3.49907200 |
| H  | 4.13029600  | -1.52644400 | -5.29233400 |
| H  | 1.81269200  | -0.72532000 | -4.85737500 |
| H  | 0.15423100  | 0.20036700  | -2.73810700 |
| N  | 1.05065900  | 0.14602100  | -2.25531700 |
| Hf | -2.94979200 | 0.23974700  | 0.05328200  |
| Cl | -4.76080500 | 1.85325200  | -0.33242900 |
| Cl | -4.19294400 | -1.79402200 | -0.39779700 |
| Cl | -2.21767200 | 0.45338200  | -2.36521300 |
| Cl | -3.30520600 | 0.28865500  | 2.48724300  |
| H  | 1.41538100  | 1.83249400  | 1.85338000  |
| Si | -0.57004900 | -2.19069200 | 0.51732200  |
| H  | 3.07745300  | -0.56332600 | 1.43770800  |
| C  | 1.19223700  | -2.48048700 | 1.12647000  |
| C  | 1.50044700  | -2.41466000 | 2.50010000  |
| C  | 2.19994900  | -2.92058300 | 0.24859000  |
| C  | 2.77212600  | -2.74652200 | 2.97487900  |
| H  | 0.73668200  | -2.09992100 | 3.21645900  |
| C  | 3.47347900  | -3.25849000 | 0.71621400  |
| H  | 1.99680400  | -2.99756200 | -0.82117600 |
| C  | 3.76363800  | -3.16751500 | 2.08080200  |

|   |             |             |             |
|---|-------------|-------------|-------------|
| H | 2.99011900  | -2.68082600 | 4.04380000  |
| H | 4.24050500  | -3.59035700 | 0.01220900  |
| H | 4.75873600  | -3.42939700 | 2.44935900  |
| C | -0.74686400 | -2.92998300 | -1.19196100 |
| H | -0.42982800 | -3.98590600 | -1.18314200 |
| H | -0.13614000 | -2.39129200 | -1.93246700 |
| H | -1.79536500 | -2.89324200 | -1.52131400 |
| C | -1.67854500 | -3.00027600 | 1.79243200  |
| H | -1.32142800 | -4.03231600 | 1.94985800  |
| H | -2.72911100 | -3.04268000 | 1.47682600  |
| H | -1.62837400 | -2.46966300 | 2.75577400  |

**21) Int6+PhMe<sub>2</sub>SiOHfCl<sub>4</sub>**

|   |             |             |             |
|---|-------------|-------------|-------------|
| C | -1.44028200 | -1.18536800 | 0.54884000  |
| C | -0.13651200 | -1.86648400 | 0.64768400  |
| O | 1.82393200  | 1.19929600  | 0.05985000  |
| O | -0.16792600 | -2.97229400 | 1.33900200  |
| O | 0.86939900  | -1.44053400 | 0.08382800  |
| C | 1.06182700  | -3.73228500 | 1.45545800  |
| H | 0.79352700  | -4.63805900 | 2.00881300  |
| H | 1.80750300  | -3.13816900 | 1.99935000  |
| H | 1.44168400  | -3.97241600 | 0.45370700  |
| C | -2.75048500 | -1.77034100 | 0.99410800  |
| H | -2.72670100 | -2.06090000 | 2.05459700  |
| C | -3.83041200 | -0.67907900 | 0.68822000  |
| C | -5.07843500 | -1.17079400 | -0.02052000 |
| C | -6.30151600 | -1.23368100 | 0.65849800  |
| C | -5.01792700 | -1.58151600 | -1.36122900 |
| C | -7.44899400 | -1.70169300 | 0.00975200  |
| H | -6.35513700 | -0.91388700 | 1.70247700  |
| C | -6.16266300 | -2.04848200 | -2.00944300 |
| H | -4.06894000 | -1.53329800 | -1.90165100 |
| C | -7.38210900 | -2.10957400 | -1.32502200 |
| H | -8.39761200 | -1.74577400 | 0.55046600  |
| H | -6.10362300 | -2.36496400 | -3.05372600 |
| H | -8.27811900 | -2.47411300 | -1.83330800 |
| C | -1.85376900 | 1.91455200  | -1.19004500 |
| C | -3.19684100 | 1.53659700  | -0.77329500 |
| C | -4.30987800 | 2.34427700  | -1.14236500 |
| C | -4.07273300 | 3.47596000  | -1.88808700 |
| C | -2.74785500 | 3.82479600  | -2.28820700 |
| C | -1.63358400 | 3.06580100  | -1.95643600 |
| C | -1.64252800 | 0.02571800  | -0.05530100 |
| C | -3.05145600 | 0.35615900  | -0.04893600 |

|    |             |             |             |
|----|-------------|-------------|-------------|
| H  | -5.31731700 | 2.05824700  | -0.83651300 |
| H  | -4.90066200 | 4.11966900  | -2.19004300 |
| H  | -2.60667700 | 4.72780100  | -2.88715200 |
| H  | -0.63073100 | 3.34347800  | -2.28161300 |
| H  | 0.07437000  | 1.05925200  | -0.80367600 |
| N  | -0.94891800 | 0.99479200  | -0.72877500 |
| Hf | 2.73946100  | -0.42118300 | -0.66298500 |
| Cl | 3.43531400  | -2.71669200 | -1.43182100 |
| Cl | 4.74612300  | 0.74556000  | -1.41326700 |
| Cl | 1.44734200  | -0.14235400 | -2.79066900 |
| Cl | 3.62996600  | -0.98234300 | 1.61651400  |
| H  | -2.95243800 | -2.69130600 | 0.42103000  |
| Si | 1.54014400  | 2.29069400  | 1.30490600  |
| H  | -4.13633700 | -0.23000200 | 1.64855500  |
| C  | 0.12269700  | 1.54291600  | 2.30963300  |
| C  | 0.29328600  | 0.29090700  | 2.93279300  |
| C  | -1.14566300 | 2.14376500  | 2.38470100  |
| C  | -0.76292300 | -0.33564300 | 3.60397400  |
| H  | 1.26328200  | -0.21129700 | 2.88258400  |
| C  | -2.20659800 | 1.52356900  | 3.05690500  |
| H  | -1.32134700 | 3.10954900  | 1.90361300  |
| C  | -2.01639400 | 0.28318600  | 3.67068000  |
| H  | -0.60736800 | -1.31028100 | 4.07350400  |
| H  | -3.18317900 | 2.01262300  | 3.09957700  |
| H  | -2.84169900 | -0.20372300 | 4.19601700  |
| C  | 1.02120100  | 3.93269000  | 0.56652000  |
| H  | 0.87628800  | 4.69039300  | 1.35489900  |
| H  | 0.08832000  | 3.86121500  | -0.01170300 |
| H  | 1.81085800  | 4.29918600  | -0.11097600 |
| C  | 3.07627300  | 2.51167000  | 2.34980300  |
| H  | 2.89958000  | 3.26217900  | 3.13888800  |
| H  | 3.91339300  | 2.86159100  | 1.72221000  |
| H  | 3.38206300  | 1.56655700  | 2.82130300  |

## 22) PhMe<sub>2</sub>SiOH

|    |             |             |             |
|----|-------------|-------------|-------------|
| Si | -1.47110300 | -0.05413700 | -0.00001000 |
| C  | 0.40880500  | -0.01757900 | 0.00002800  |
| C  | 1.10163100  | 1.20860600  | 0.00006000  |
| C  | 1.16499700  | -1.20407000 | 0.00001100  |
| C  | 2.49887200  | 1.25011300  | 0.00004100  |
| H  | 0.54556700  | 2.15186300  | 0.00008200  |
| C  | 2.56330600  | -1.16865300 | 0.00000200  |
| H  | 0.64847700  | -2.16727500 | 0.00000800  |
| C  | 3.23301300  | 0.05889500  | 0.00001400  |

|   |             |             |             |
|---|-------------|-------------|-------------|
| H | 3.01756600  | 2.21259100  | 0.00005600  |
| H | 3.13284800  | -2.10209500 | -0.00001500 |
| H | 4.32589400  | 0.08830800  | 0.00000900  |
| C | -2.14253200 | 0.79017200  | 1.53708600  |
| H | -1.83113100 | 1.84826300  | 1.56771200  |
| H | -1.77032000 | 0.30056700  | 2.45229100  |
| H | -3.24582600 | 0.76703500  | 1.55872700  |
| C | -2.14219600 | 0.78942900  | -1.53765600 |
| H | -1.76850400 | 0.30046100  | -2.45259900 |
| H | -1.83201700 | 1.84789400  | -1.56777000 |
| H | -3.24543800 | 0.76499600  | -1.56037500 |
| O | -1.83948700 | -1.69709500 | 0.00054100  |
| H | -2.78115000 | -1.91940300 | 0.00016900  |

### 23) Int6

|   |             |             |             |
|---|-------------|-------------|-------------|
| C | -0.62516100 | 0.60542600  | 2.05936900  |
| C | 0.02017800  | 0.32187000  | 3.36655100  |
| O | 0.92100000  | 1.24156200  | 3.69120500  |
| O | -0.30162700 | -0.62016600 | 4.05877500  |
| C | 1.67774600  | 1.00204400  | 4.88263200  |
| H | 1.01490600  | 0.91439200  | 5.75614800  |
| H | 2.34693500  | 1.86305300  | 4.99701200  |
| H | 2.26420000  | 0.07706800  | 4.77532700  |
| C | -0.45601600 | 1.82685700  | 1.21338600  |
| H | 0.60079300  | 2.04438600  | 1.01240900  |
| C | -1.25861700 | 1.53550600  | -0.10000600 |
| C | -1.99719800 | 2.70722300  | -0.70186100 |
| C | -1.40836100 | 3.44727300  | -1.73689700 |
| C | -3.25832200 | 3.09442100  | -0.22273900 |
| C | -2.06607300 | 4.55283000  | -2.28429200 |
| H | -0.42620300 | 3.15028400  | -2.11406200 |
| C | -3.91827100 | 4.19721100  | -0.77042400 |
| H | -3.72850900 | 2.52640400  | 0.58436000  |
| C | -3.32363300 | 4.92993100  | -1.80354500 |
| H | -1.59528000 | 5.11904400  | -3.09194800 |
| H | -4.90131100 | 4.48602200  | -0.38967500 |
| H | -3.84030000 | 5.79178600  | -2.23325100 |
| C | -3.20667800 | -1.55946800 | 0.81523600  |
| C | -3.08756500 | -0.51222500 | -0.18043900 |
| C | -3.93597900 | -0.52198100 | -1.31646300 |
| C | -4.86890200 | -1.53261300 | -1.43337600 |
| C | -4.97453700 | -2.54683200 | -0.44168100 |
| C | -4.15758200 | -2.58169600 | 0.67957400  |
| C | -1.61005800 | -0.18778900 | 1.51669000  |



|   |             |             |             |
|---|-------------|-------------|-------------|
| C | -2.06340400 | 0.33813200  | 0.27481200  |
| H | -3.84526700 | 0.26072800  | -2.07124900 |
| H | -5.53719000 | -1.56389600 | -2.29605600 |
| H | -5.72525500 | -3.33027000 | -0.57143000 |
| H | -4.24694600 | -3.37039500 | 1.42814400  |
| H | -2.14873400 | -1.91244800 | 2.64330900  |
| N | -2.29078100 | -1.34342500 | 1.81478900  |
| H | -0.88514600 | 2.69219800  | 1.74967300  |
| H | -0.48390600 | 1.18778500  | -0.80994700 |
| P | 2.03034100  | -0.50624800 | 0.19345700  |
| O | 1.66593900  | 0.64602800  | -0.69957600 |
| O | 1.35584800  | -0.74841600 | 1.52439700  |
| O | 1.95571000  | -1.93810300 | -0.67312700 |
| O | 3.65596900  | -0.52667500 | 0.49689200  |
| C | 0.72354500  | -2.37715500 | -1.09641600 |
| C | 0.16391400  | -1.86793800 | -2.27506800 |
| C | 0.04307300  | -3.34322100 | -0.34630500 |
| C | -1.07244200 | -2.34935300 | -2.71351400 |
| H | 0.70450000  | -1.09701400 | -2.82597900 |
| C | -1.19179800 | -3.81886800 | -0.79477200 |
| H | 0.49315300  | -3.70353100 | 0.58027900  |
| C | -1.75153600 | -3.32688000 | -1.97868400 |
| H | -1.51116700 | -1.95256100 | -3.63252600 |
| H | -1.72379300 | -4.57473000 | -0.21205600 |
| H | -2.72098700 | -3.69446000 | -2.32030300 |
| C | 4.61503500  | -0.08839700 | -0.37965300 |
| C | 4.59105400  | -0.41187800 | -1.74295300 |
| C | 5.66261700  | 0.67919200  | 0.14335500  |
| C | 5.61816400  | 0.04203900  | -2.57464800 |
| H | 3.77943000  | -1.02322400 | -2.13735200 |
| C | 6.68829700  | 1.12045800  | -0.69619300 |
| H | 5.65646600  | 0.91928600  | 1.20870200  |
| C | 6.66970900  | 0.80775300  | -2.05977400 |
| H | 5.59573500  | -0.21192400 | -3.63772100 |
| H | 7.50423400  | 1.71763700  | -0.28072900 |
| H | 7.47010000  | 1.15700400  | -2.71638200 |

#### 24) TS6

|   |             |            |             |
|---|-------------|------------|-------------|
| C | -1.15288600 | 2.21664200 | 0.35980800  |
| C | -0.38325400 | 3.46926400 | 0.40507300  |
| O | -0.55990100 | 4.21250900 | -0.68603200 |
| O | 0.33405000  | 3.77435300 | 1.33973500  |
| C | 0.21607700  | 5.41119300 | -0.78369000 |
| H | 0.00928400  | 6.08075000 | 0.06444500  |

|   |             |             |             |
|---|-------------|-------------|-------------|
| H | -0.07830900 | 5.88769000  | -1.72632800 |
| H | 1.28970600  | 5.17018600  | -0.80164800 |
| C | -2.02929400 | 1.72905800  | -0.75359100 |
| H | -1.57151100 | 1.90873400  | -1.73951800 |
| C | -2.25690600 | 0.23236500  | -0.44048300 |
| C | -3.39702100 | -0.54738000 | -1.02121600 |
| C | -3.23643600 | -1.92143100 | -1.27060700 |
| C | -4.62755400 | 0.05331600  | -1.32937500 |
| C | -4.28498300 | -2.67917000 | -1.79581800 |
| H | -2.27364900 | -2.39359900 | -1.06305800 |
| C | -5.67527900 | -0.70440500 | -1.86133900 |
| H | -4.77438800 | 1.11961500  | -1.14658000 |
| C | -5.51008700 | -2.07277600 | -2.09317000 |
| H | -4.14085500 | -3.74605700 | -1.98424700 |
| H | -6.62749700 | -0.22013000 | -2.09263700 |
| H | -6.33003900 | -2.66341100 | -2.50909000 |
| C | -0.91372100 | -0.21362300 | 2.99873500  |
| C | -1.71375000 | -0.86057100 | 1.98916900  |
| C | -2.18770200 | -2.17371700 | 2.20182700  |
| C | -1.86977800 | -2.81034100 | 3.39132500  |
| C | -1.08702300 | -2.15560100 | 4.37240200  |
| C | -0.60086500 | -0.86214900 | 4.19646500  |
| C | -1.09094900 | 1.25470700  | 1.33084800  |
| C | -1.82211000 | 0.06995900  | 0.91929200  |
| H | -2.78795200 | -2.66898300 | 1.43775500  |
| H | -2.22197700 | -3.82637900 | 3.57905700  |
| H | -0.85208300 | -2.68485200 | 5.29929300  |
| H | 0.01072500  | -0.37467300 | 4.95673900  |
| H | 0.07237700  | 1.69079200  | 3.05272100  |
| N | -0.55415100 | 1.05258900  | 2.57360200  |
| H | -2.98735700 | 2.27941100  | -0.74058800 |
| H | -1.23279100 | -0.22113300 | -0.97772400 |
| P | 0.92660800  | 0.51670100  | -2.09327000 |
| O | -0.01641400 | -0.60147200 | -1.62023800 |
| O | 0.44554600  | 1.62631900  | -2.95722100 |
| O | 1.63902700  | 1.20590700  | -0.75861100 |
| O | 2.21277300  | -0.20156100 | -2.82987400 |
| C | 2.01363500  | 0.65694100  | 0.44116800  |
| C | 1.75276700  | -0.66657300 | 0.82061900  |
| C | 2.68791700  | 1.51873700  | 1.31721500  |
| C | 2.17764100  | -1.11625000 | 2.07302100  |
| H | 1.21779800  | -1.32944500 | 0.14537500  |
| C | 3.09901600  | 1.05799900  | 2.56850100  |
| H | 2.86630500  | 2.54800700  | 1.00434900  |

|   |            |             |             |
|---|------------|-------------|-------------|
| C | 2.84805400 | -0.26401000 | 2.95453800  |
| H | 1.96850800 | -2.14911300 | 2.36140000  |
| H | 3.62236300 | 1.73864800  | 3.24514800  |
| H | 3.17116900 | -0.62502400 | 3.93368900  |
| C | 2.95214200 | -1.20884800 | -2.24463000 |
| C | 4.19102000 | -0.89604800 | -1.67864800 |
| C | 2.46841000 | -2.52048200 | -2.23150000 |
| C | 4.94894600 | -1.90780500 | -1.08386000 |
| H | 4.53639400 | 0.13915800  | -1.69742300 |
| C | 3.23330800 | -3.52494000 | -1.63285800 |
| H | 1.49295100 | -2.73027700 | -2.67195400 |
| C | 4.47154700 | -3.22258700 | -1.05491800 |
| H | 5.91426500 | -1.66415100 | -0.63319700 |
| H | 2.85658200 | -4.55082900 | -1.61566300 |
| H | 5.06397400 | -4.01084900 | -0.58436600 |

25) 3a

|   |             |             |             |
|---|-------------|-------------|-------------|
| C | -1.56757600 | -1.27320600 | 0.03203900  |
| C | -2.83885800 | -1.95467800 | 0.04035300  |
| O | -3.88045300 | -1.07410800 | 0.08045500  |
| O | -3.00892300 | -3.16229400 | 0.01584100  |
| C | -5.18741600 | -1.64141300 | 0.09357800  |
| H | -5.88962200 | -0.79824100 | 0.13079000  |
| H | -5.33287400 | -2.28657200 | 0.97432700  |
| H | -5.37149600 | -2.23958900 | -0.81278900 |
| C | -0.21980100 | -1.94966400 | -0.01174800 |
| H | -0.11047900 | -2.57814000 | -0.91446500 |
| C | 0.80033600  | -0.82309700 | -0.00454600 |
| C | 2.24042000  | -1.07254100 | 0.01221400  |
| C | 2.76949800  | -2.27396300 | -0.50777400 |
| C | 3.14044900  | -0.14414000 | 0.57744300  |
| C | 4.14211200  | -2.52061800 | -0.48800400 |
| H | 2.09941600  | -3.01456800 | -0.94769500 |
| C | 4.51205600  | -0.39468500 | 0.59979900  |
| H | 2.75390600  | 0.76536200  | 1.03680600  |
| C | 5.02163400  | -1.58129500 | 0.06123400  |
| H | 4.52886300  | -3.45325500 | -0.90637400 |
| H | 5.18733300  | 0.33758900  | 1.04954500  |
| H | 6.09670500  | -1.77630900 | 0.07627900  |
| C | -1.12356600 | 2.32073000  | -0.01852300 |
| C | 0.22026800  | 1.82890400  | -0.04245800 |
| C | 1.27173500  | 2.74763500  | -0.13803400 |
| C | 0.98738400  | 4.11767400  | -0.19173800 |
| C | -0.33642900 | 4.57695000  | -0.14921600 |

|   |             |             |             |
|---|-------------|-------------|-------------|
| C | -1.41125800 | 3.68312800  | -0.06407200 |
| C | -1.32457600 | 0.07841500  | 0.03592700  |
| C | 0.11090300  | 0.36955900  | 0.00927100  |
| H | 2.30618100  | 2.40693800  | -0.18047400 |
| H | 1.80746700  | 4.83520700  | -0.26717400 |
| H | -0.53772000 | 5.65046400  | -0.18729500 |
| H | -2.44366600 | 4.03803500  | -0.04119700 |
| H | -3.03034900 | 1.32376100  | 0.03580900  |
| N | -2.01951800 | 1.24980100  | 0.03797100  |
| H | -0.05591900 | -2.63025500 | 0.84327400  |

## X. NMR Spectra

### $^1\text{H}$ NMR (500 MHz, DMSO- $d_6$ )

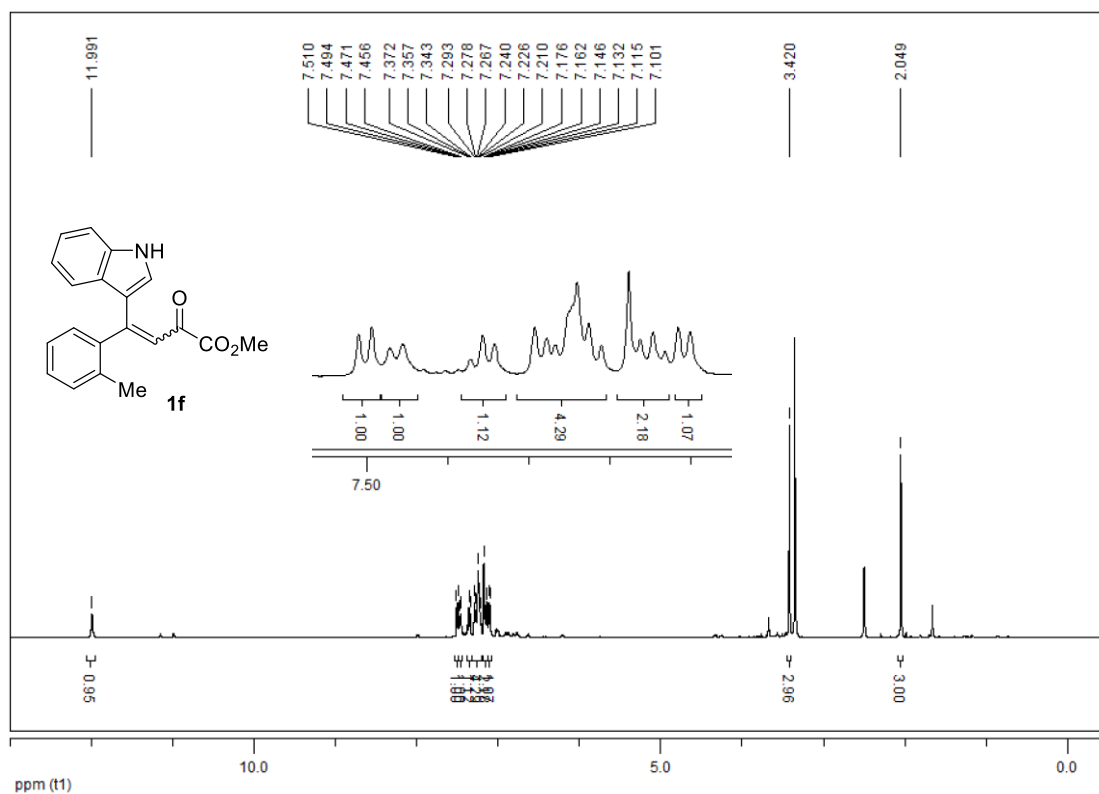

### $^{13}\text{C}\{\text{H}\}$ NMR (126 MHz, DMSO- $d_6$ )

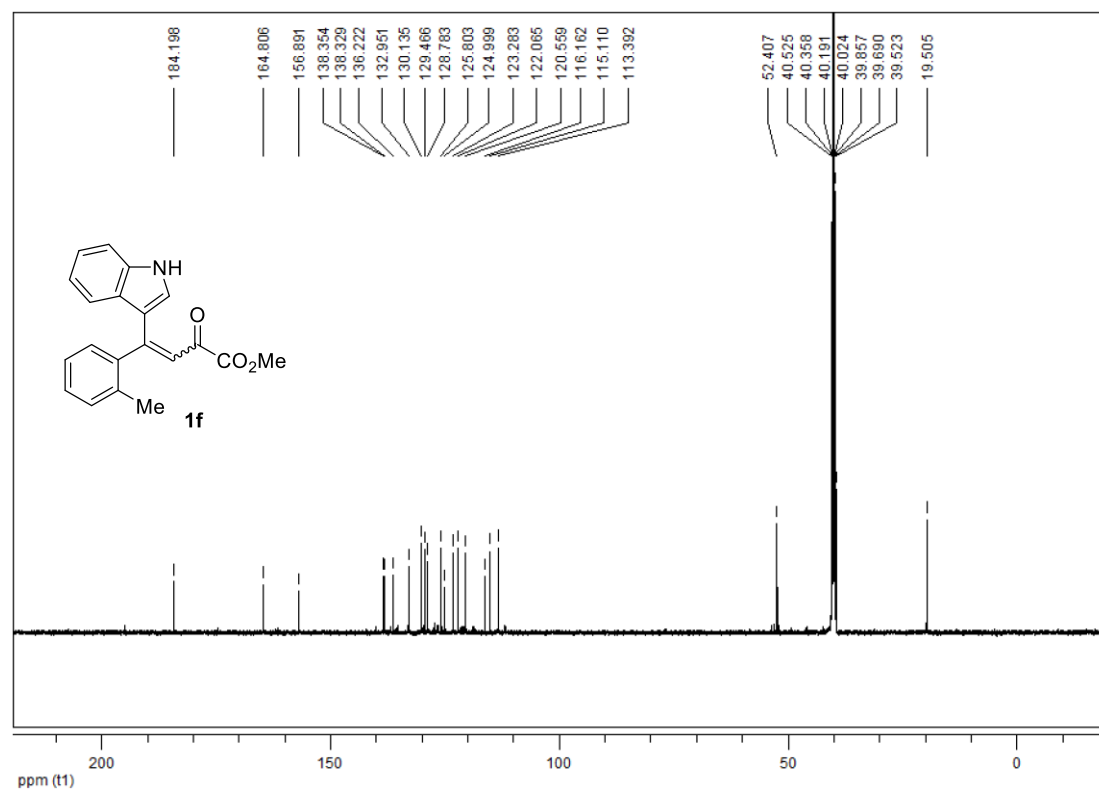

**<sup>1</sup>H NMR (500 MHz, DMSO-d<sub>6</sub>)**

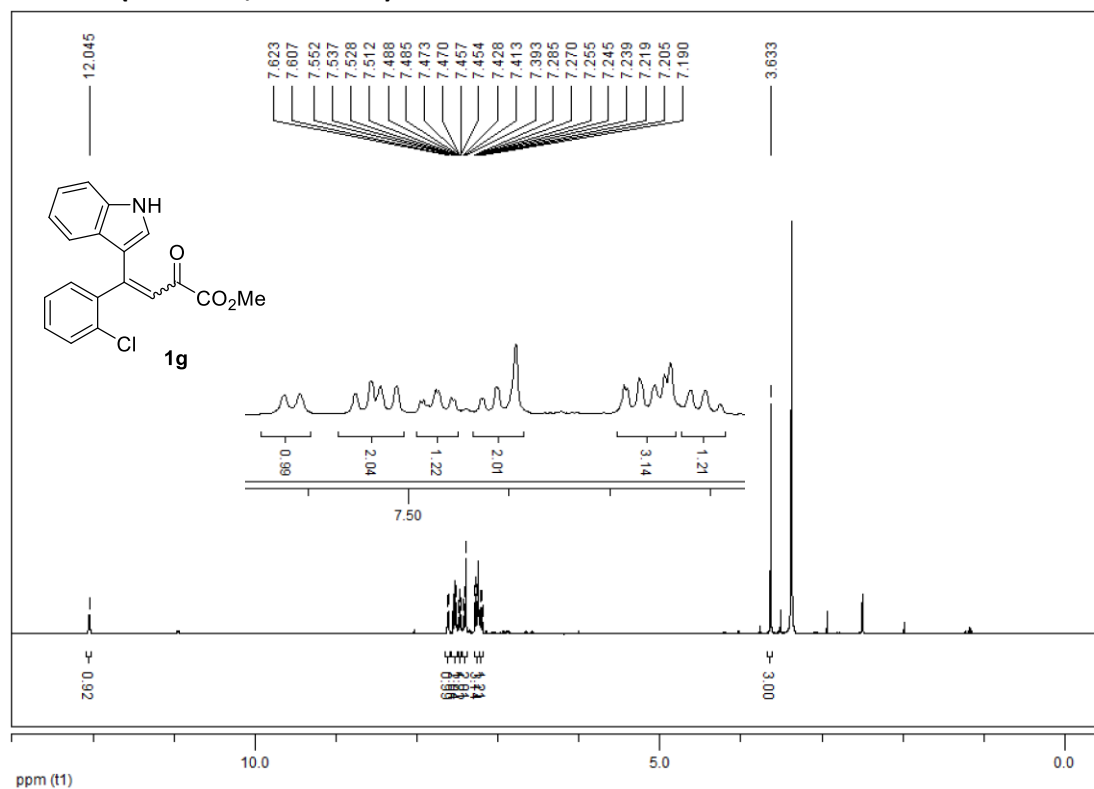

**<sup>13</sup>C{<sup>1</sup>H} NMR (126 MHz, DMSO-d<sub>6</sub>)**

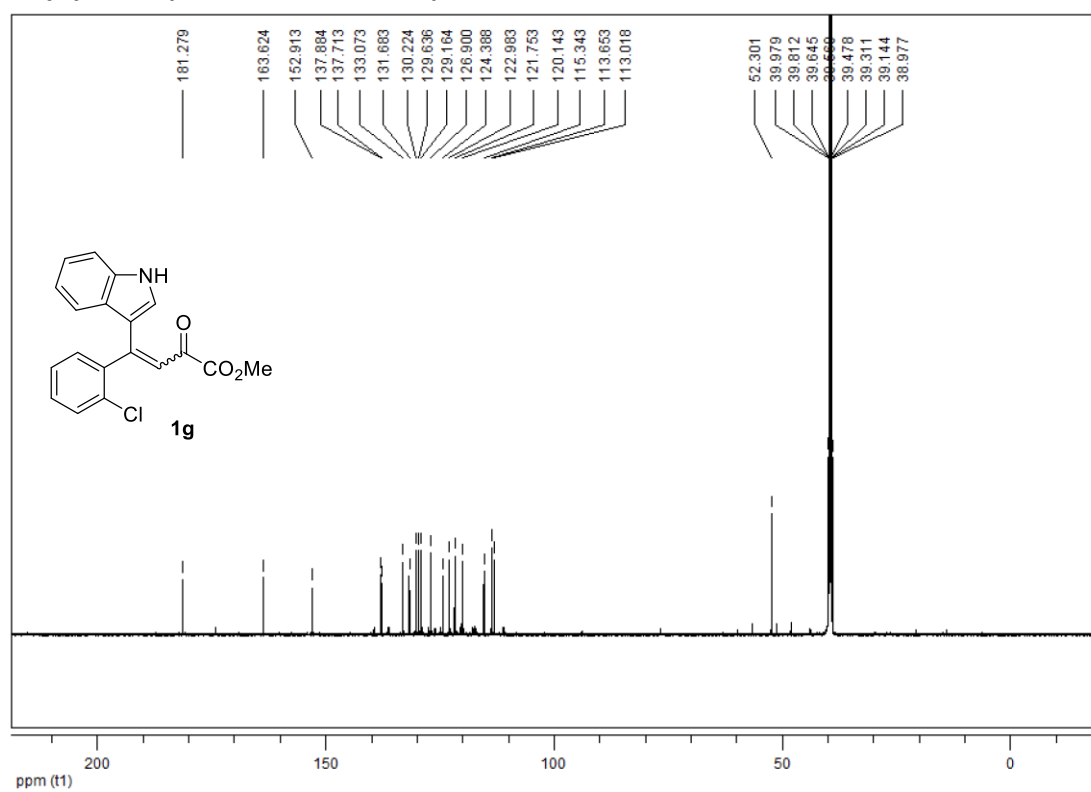

**<sup>1</sup>H NMR (500 MHz, DMSO-d<sub>6</sub>)**

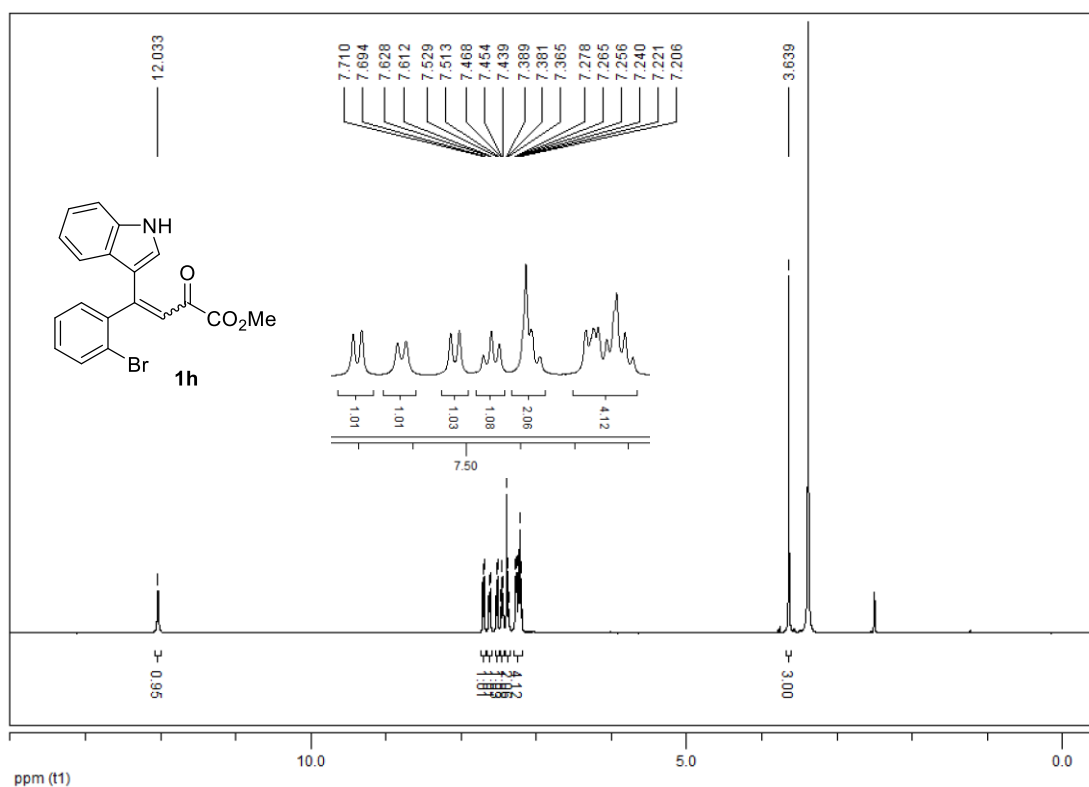

**<sup>13</sup>C{<sup>1</sup>H} NMR (126 MHz, DMSO-d<sub>6</sub>)**

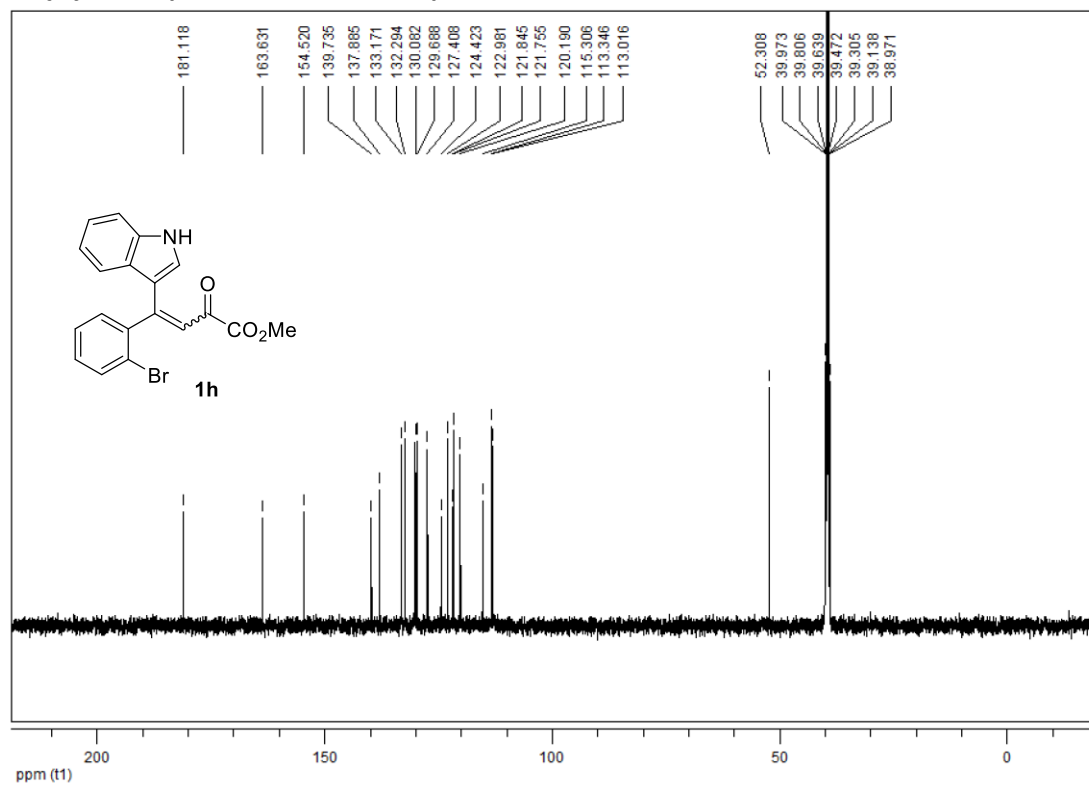

**<sup>1</sup>H NMR (500 MHz, DMSO-d<sub>6</sub>)**

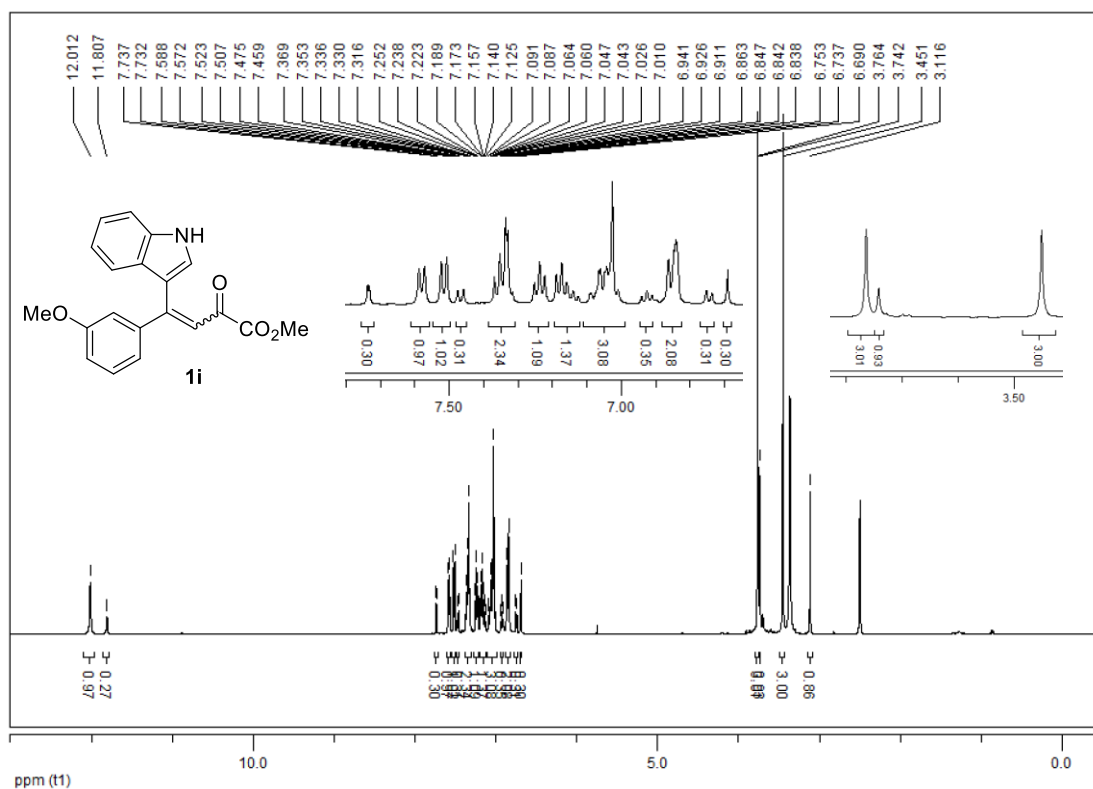

**<sup>13</sup>C{<sup>1</sup>H} NMR (126 MHz, DMSO-d<sub>6</sub>)**

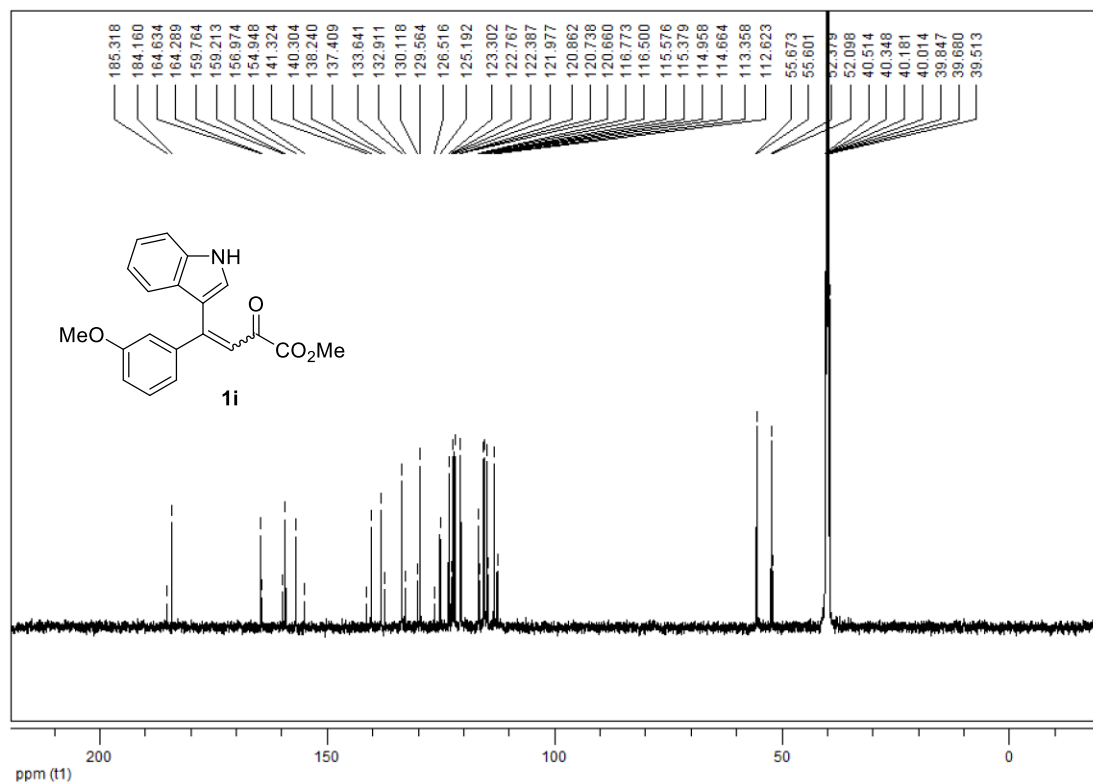





**<sup>1</sup>H NMR (500 MHz, DMSO-d<sub>6</sub>)**

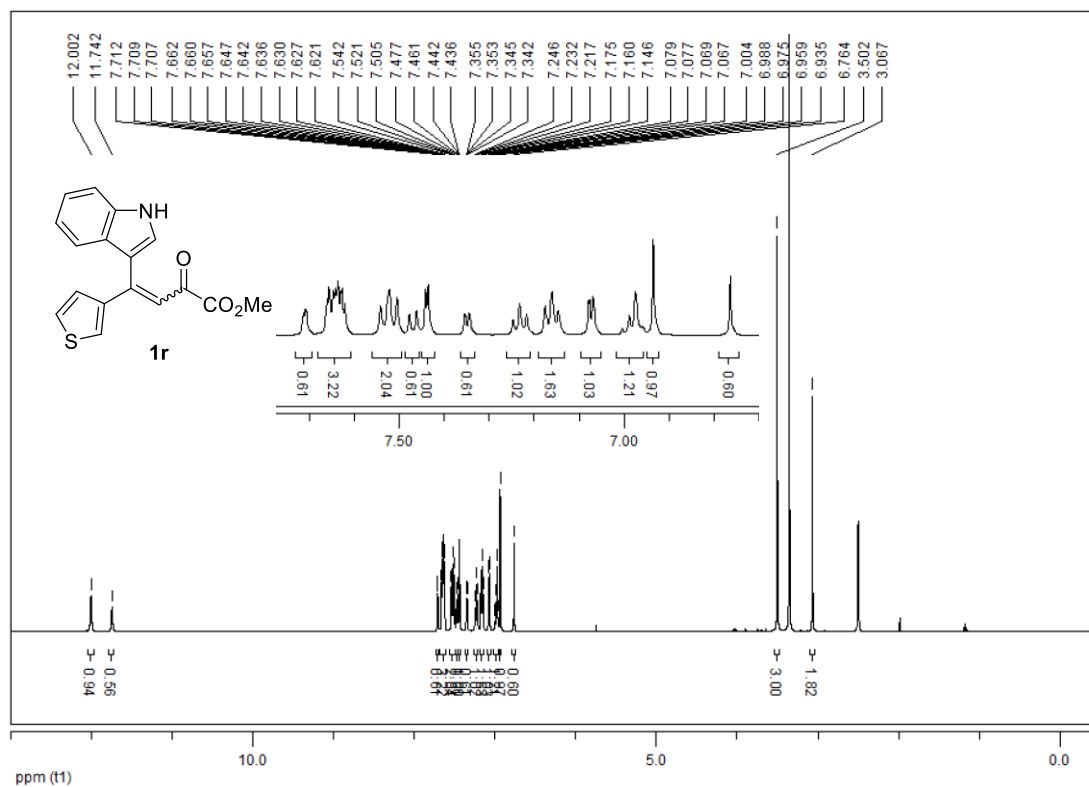

**<sup>13</sup>C{<sup>1</sup>H} NMR (126 MHz, DMSO-d<sub>6</sub>)**

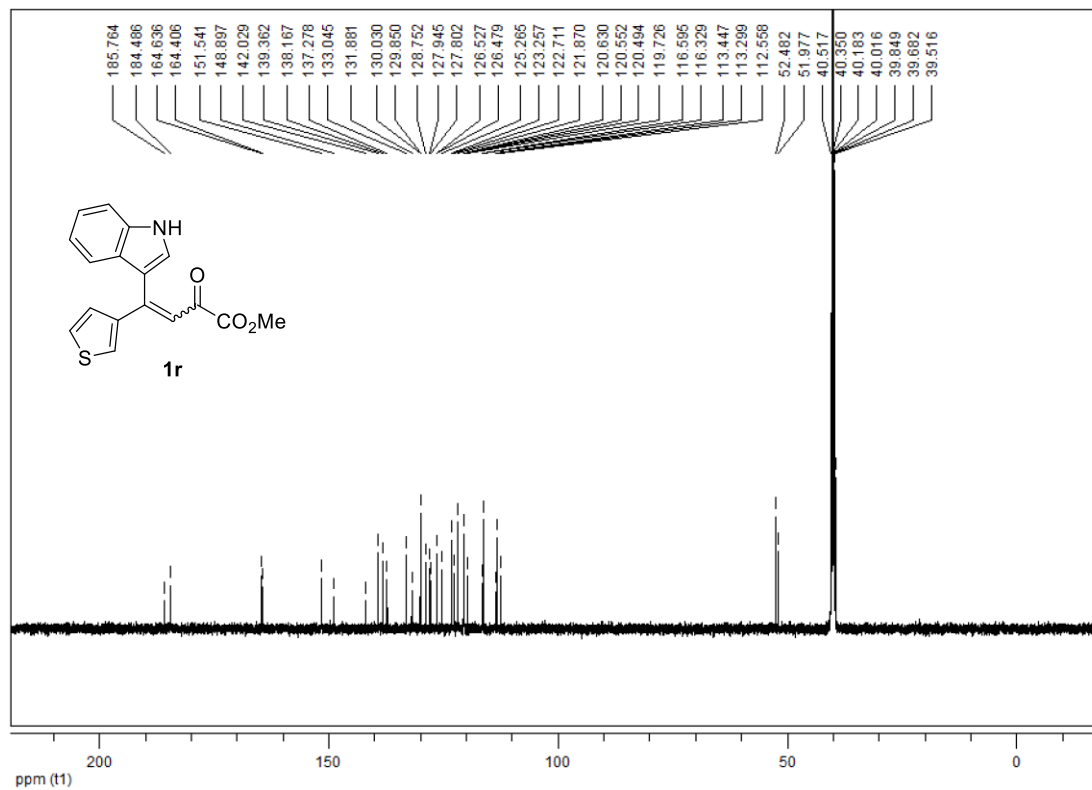

**<sup>1</sup>H NMR (500 MHz, DMSO-d<sub>6</sub>)**

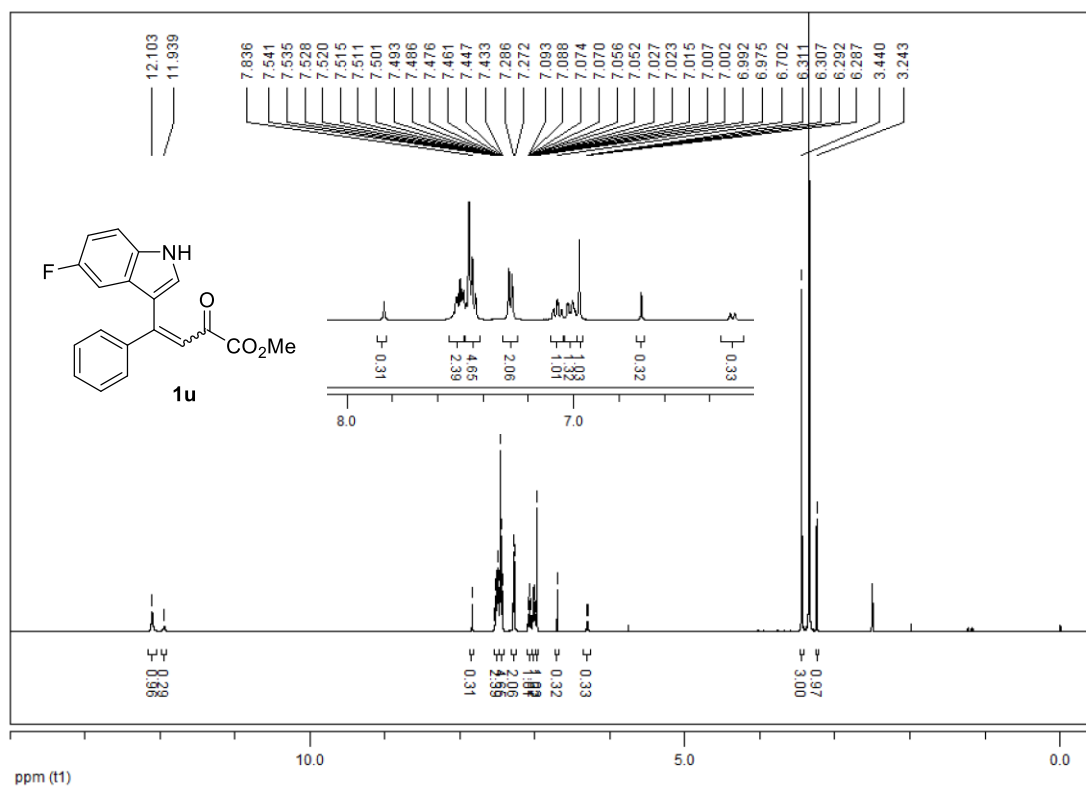

**<sup>13</sup>C{<sup>1</sup>H} NMR (126 MHz, DMSO-d<sub>6</sub>)**

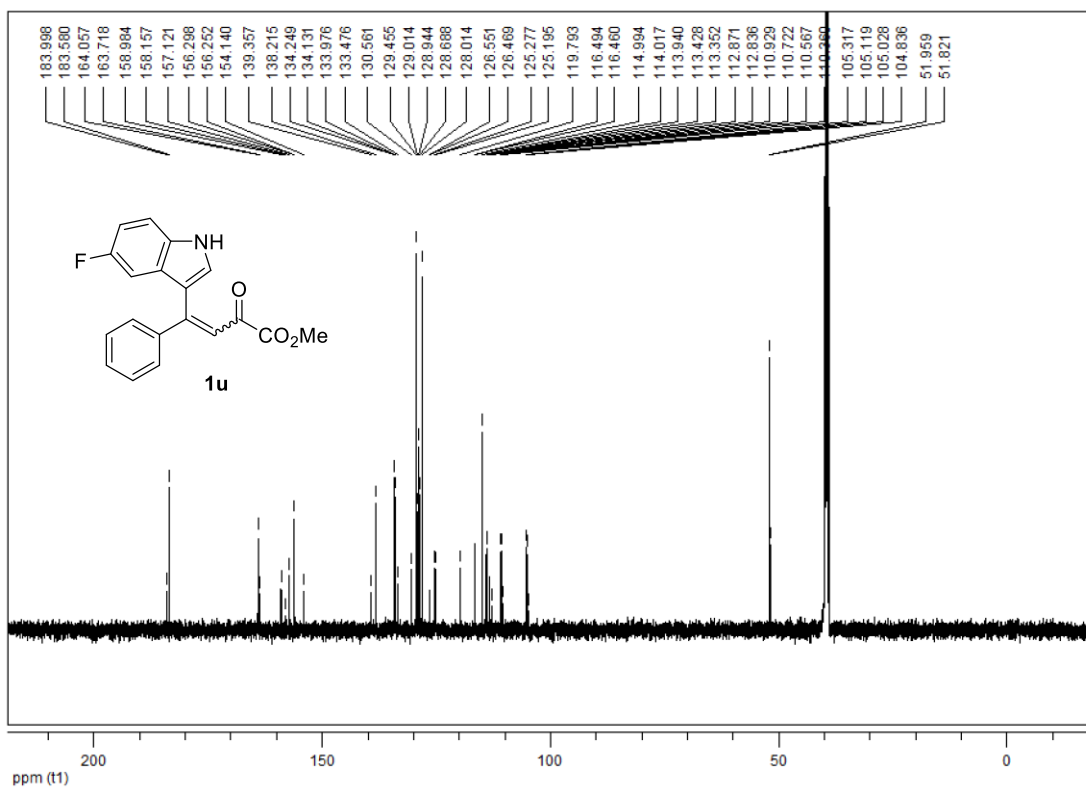

**<sup>19</sup>F NMR (376 MHz, DMSO-d<sub>6</sub>)**

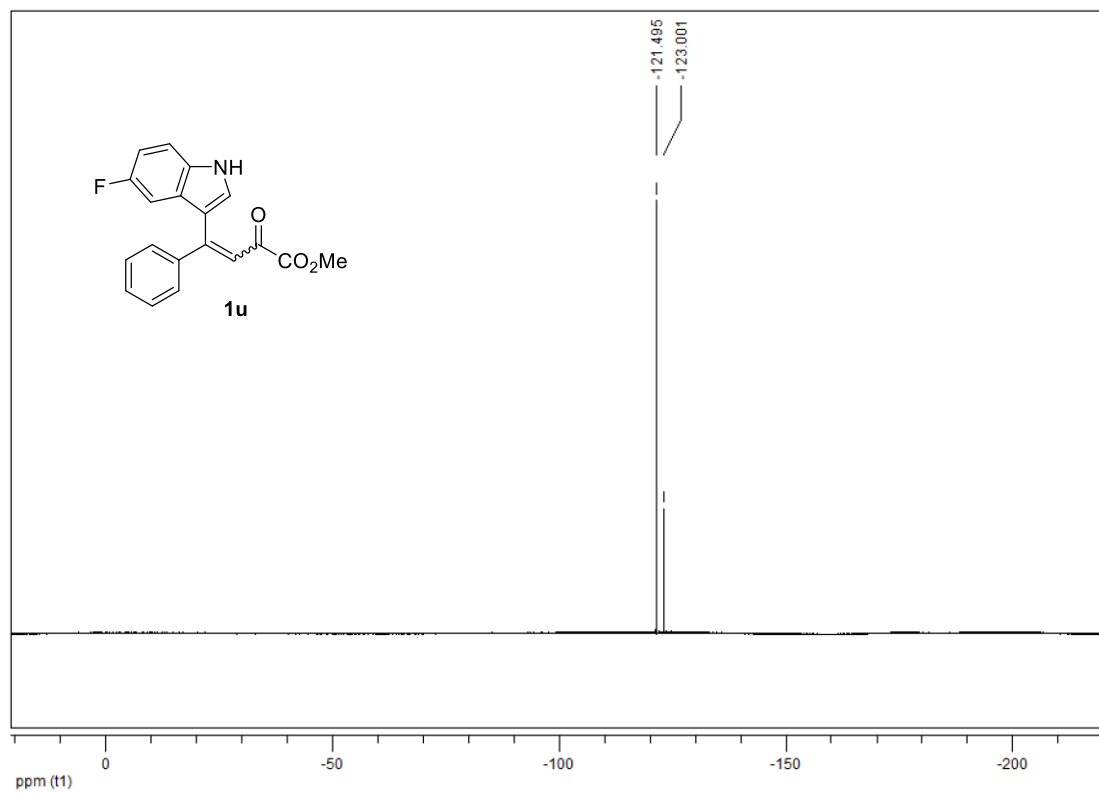

**<sup>1</sup>H NMR (500 MHz, DMSO-d<sub>6</sub>)**

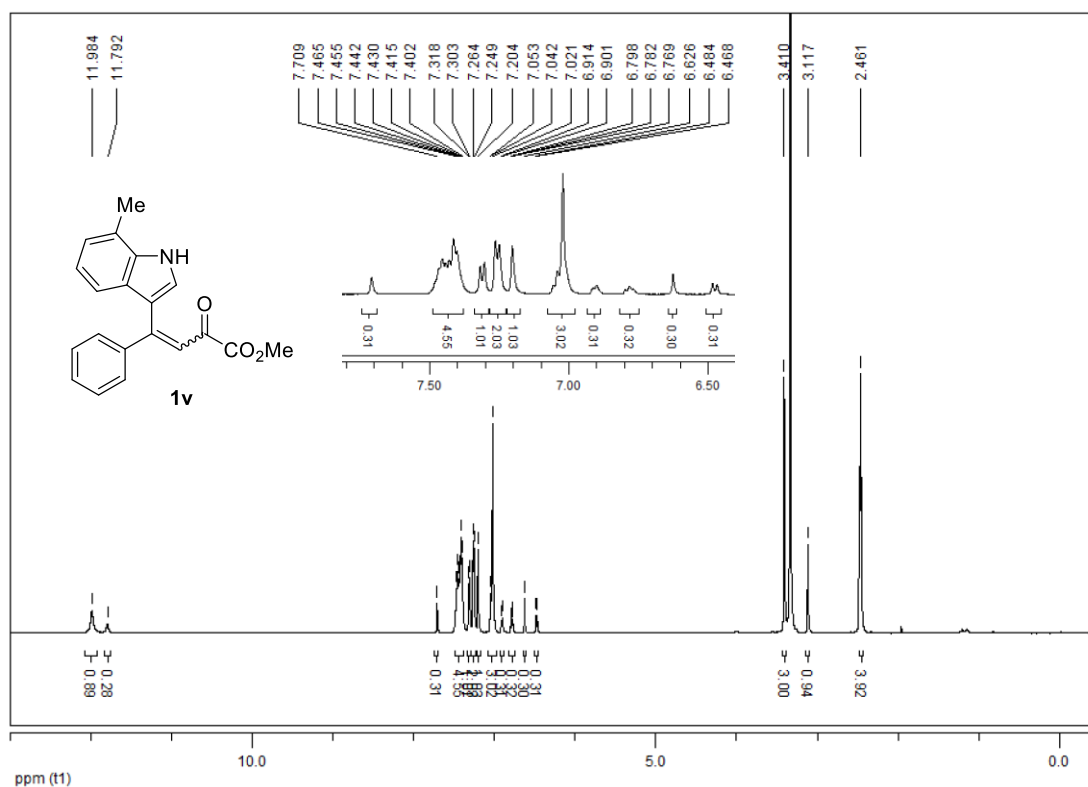

**<sup>13</sup>C{<sup>1</sup>H} NMR (126 MHz, DMSO-d<sub>6</sub>)**

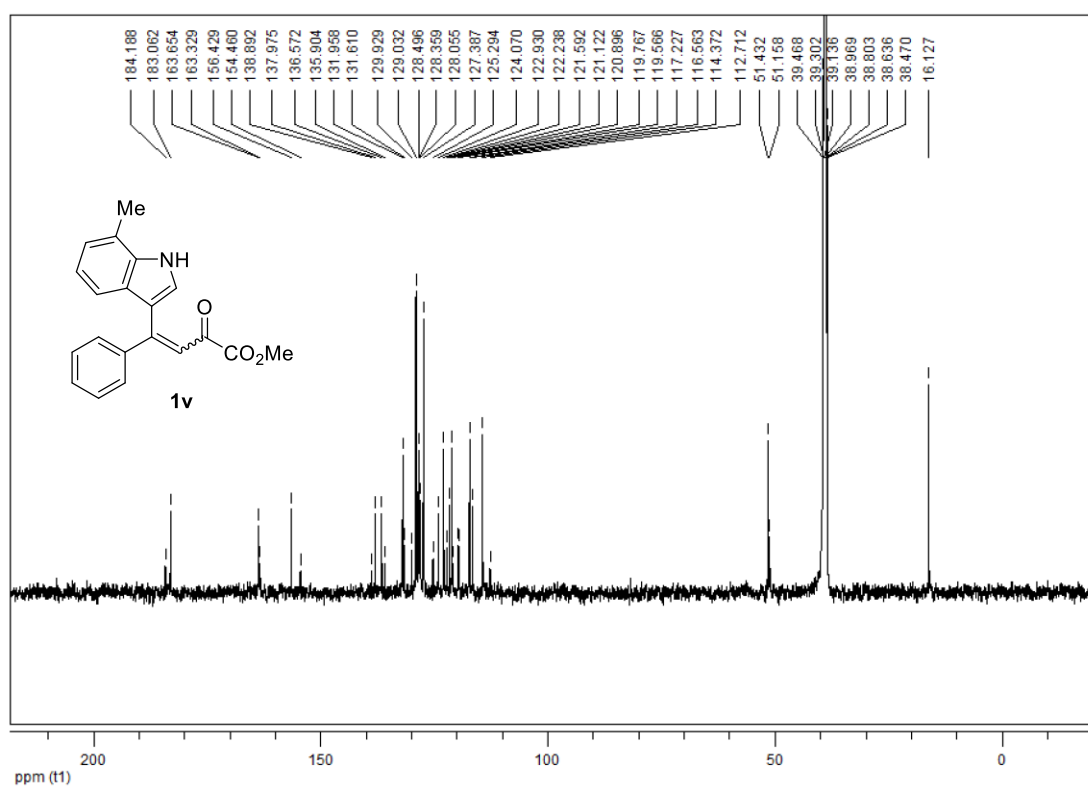

**<sup>1</sup>H NMR (500 MHz, DMSO-d<sub>6</sub>)**

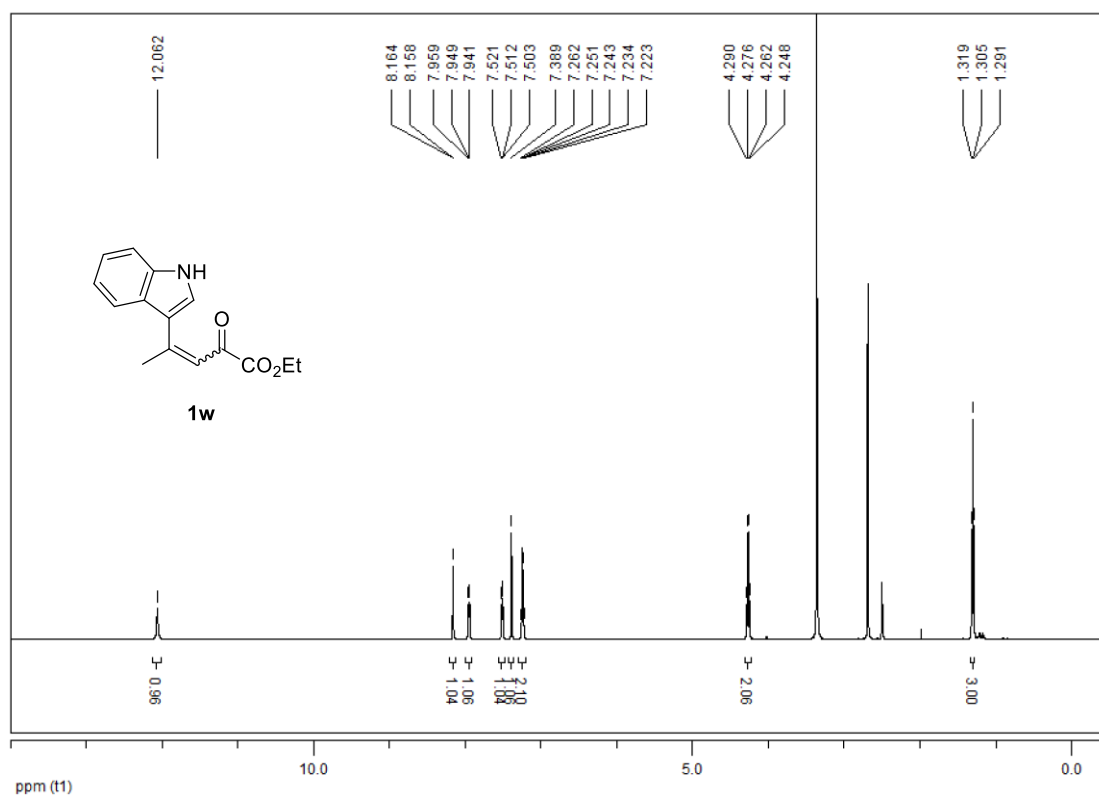

**<sup>13</sup>C{H} NMR (126 MHz, DMSO-d<sub>6</sub>)**

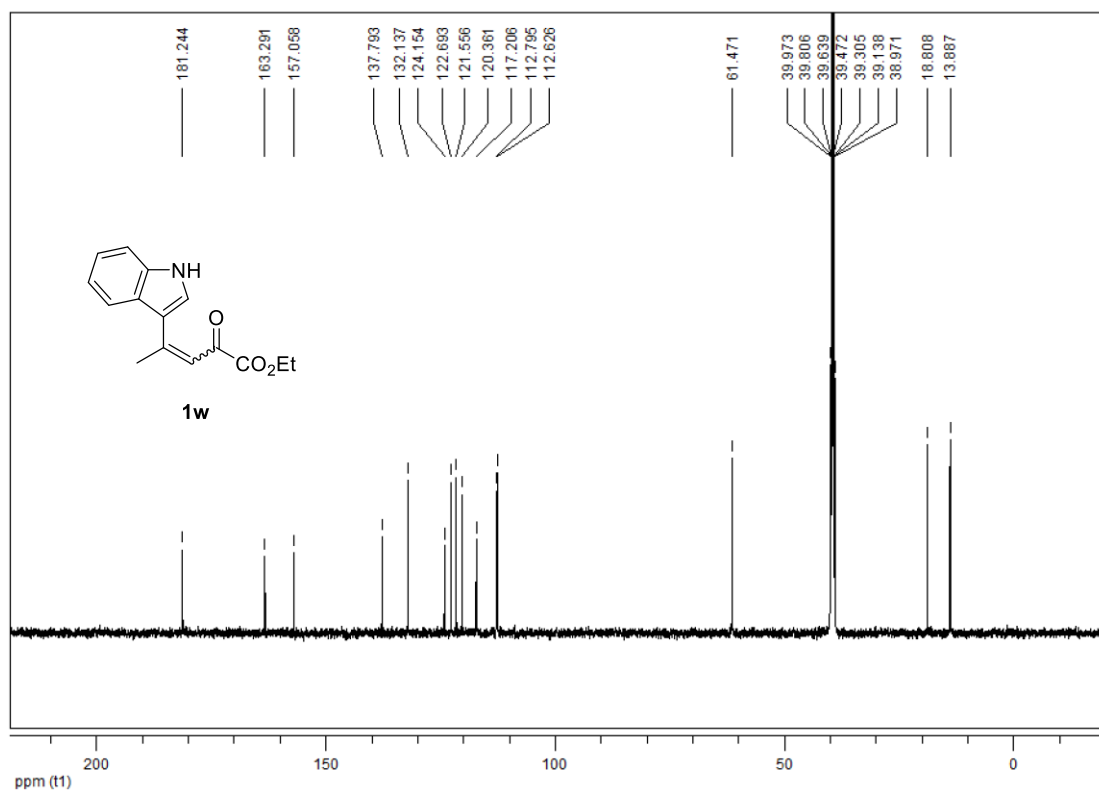

### <sup>1</sup>H NMR (500 MHz, DMSO-d<sub>6</sub>)

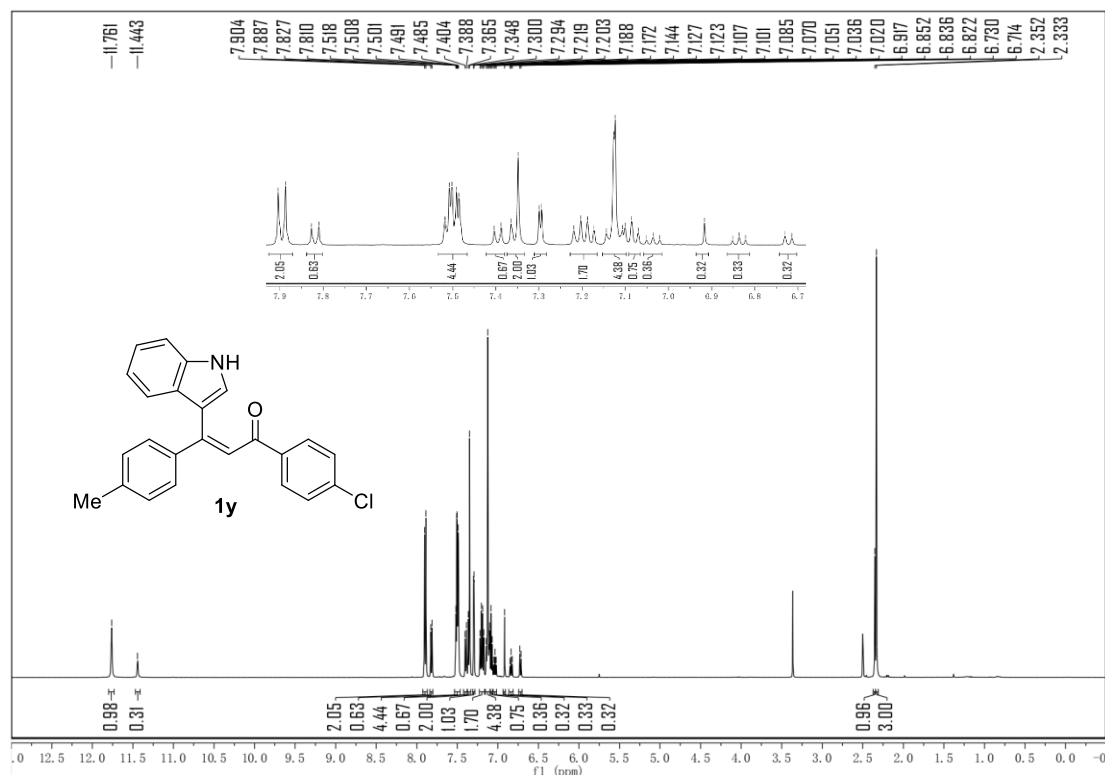

### <sup>13</sup>C{H} NMR (126 MHz, DMSO-d<sub>6</sub>)

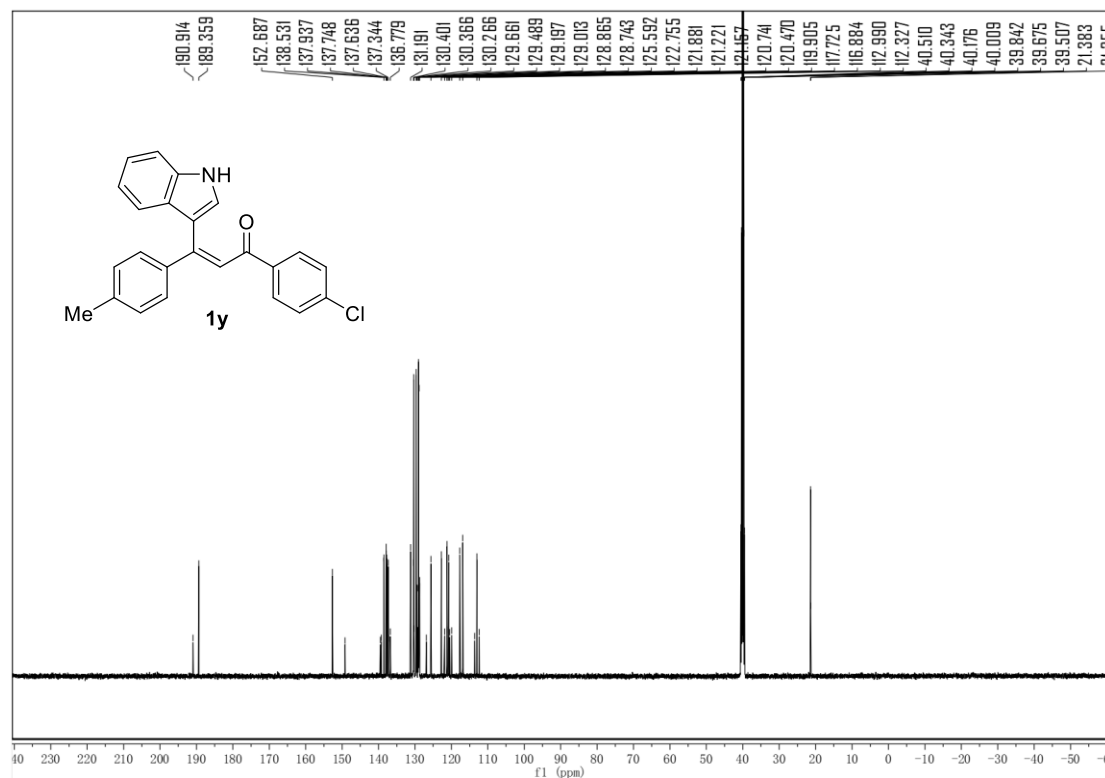

**<sup>1</sup>H NMR (500 MHz, DMSO-d<sub>6</sub>)**

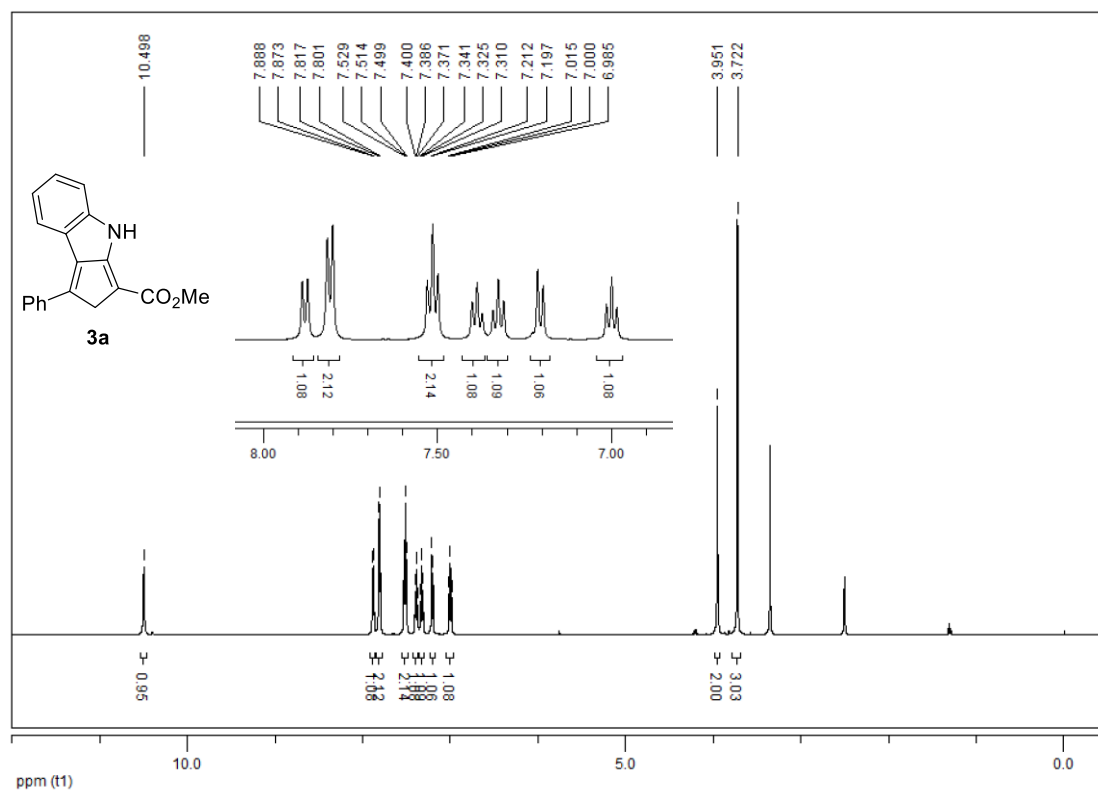

**<sup>13</sup>C{<sup>1</sup>H} NMR (126 MHz, DMSO-d<sub>6</sub>)**

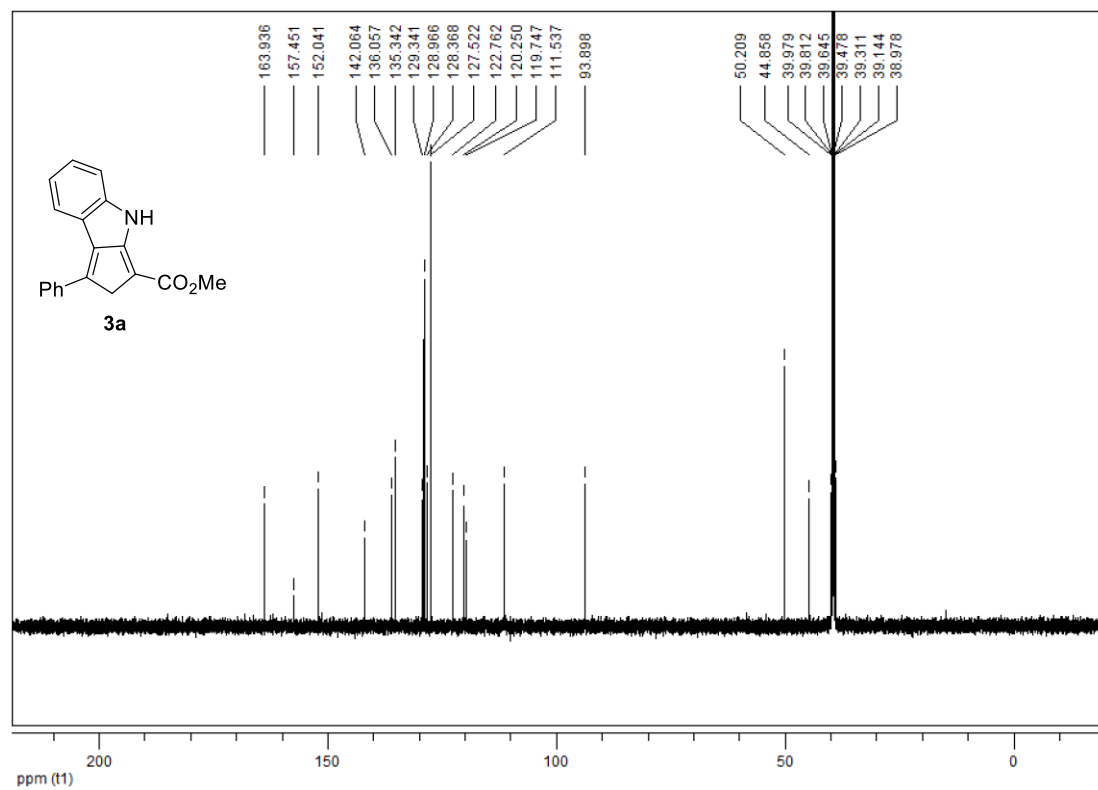



**<sup>1</sup>H NMR (500 MHz, DMSO-d<sub>6</sub>)**

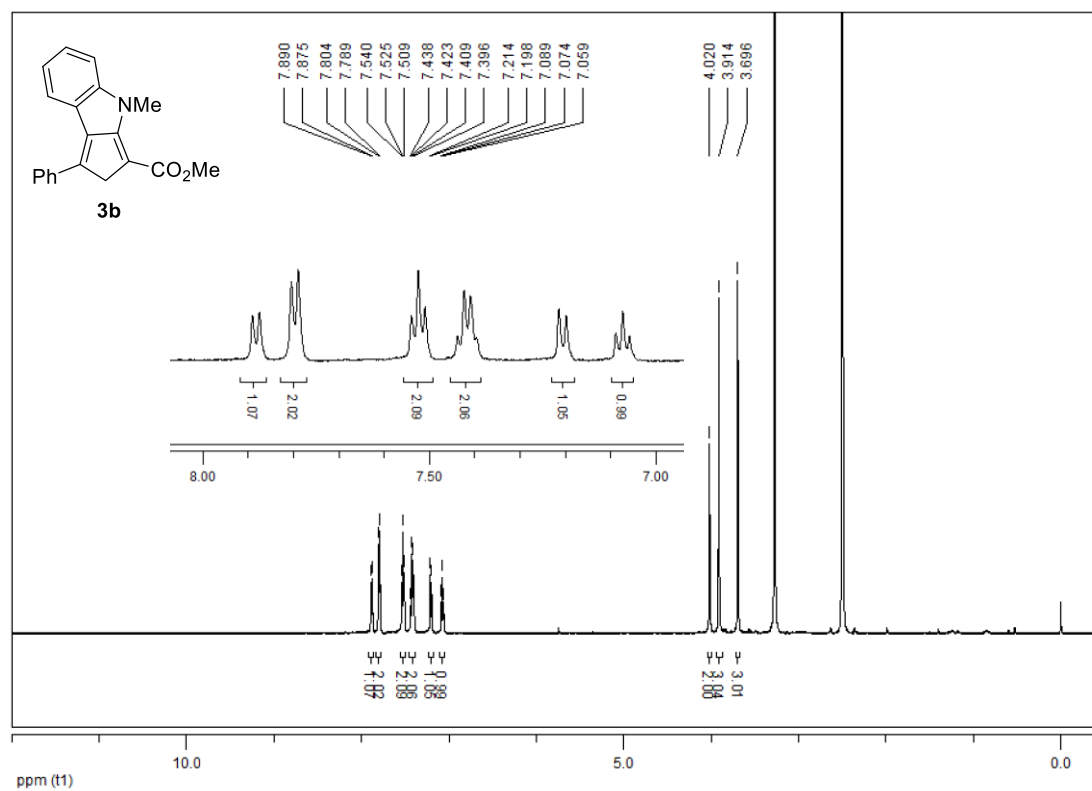

**<sup>13</sup>C{H} NMR (126 MHz, CDCl<sub>3</sub>)**

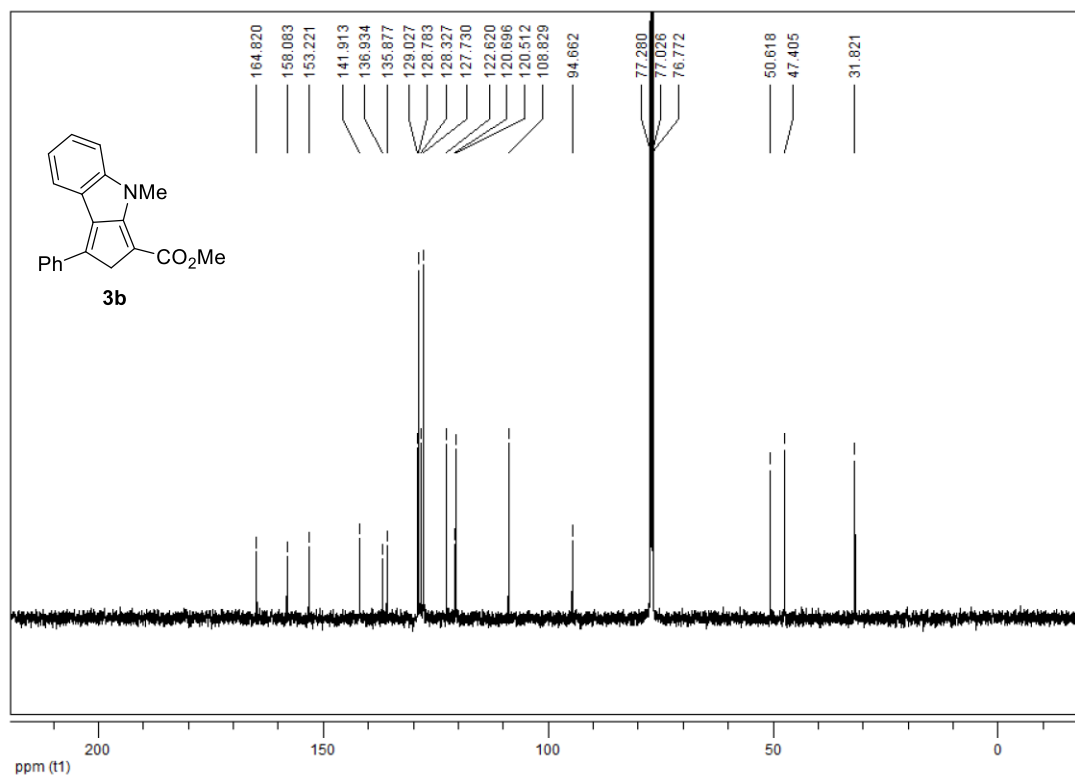

**<sup>1</sup>H NMR (500 MHz, DMSO-d<sub>6</sub>)**

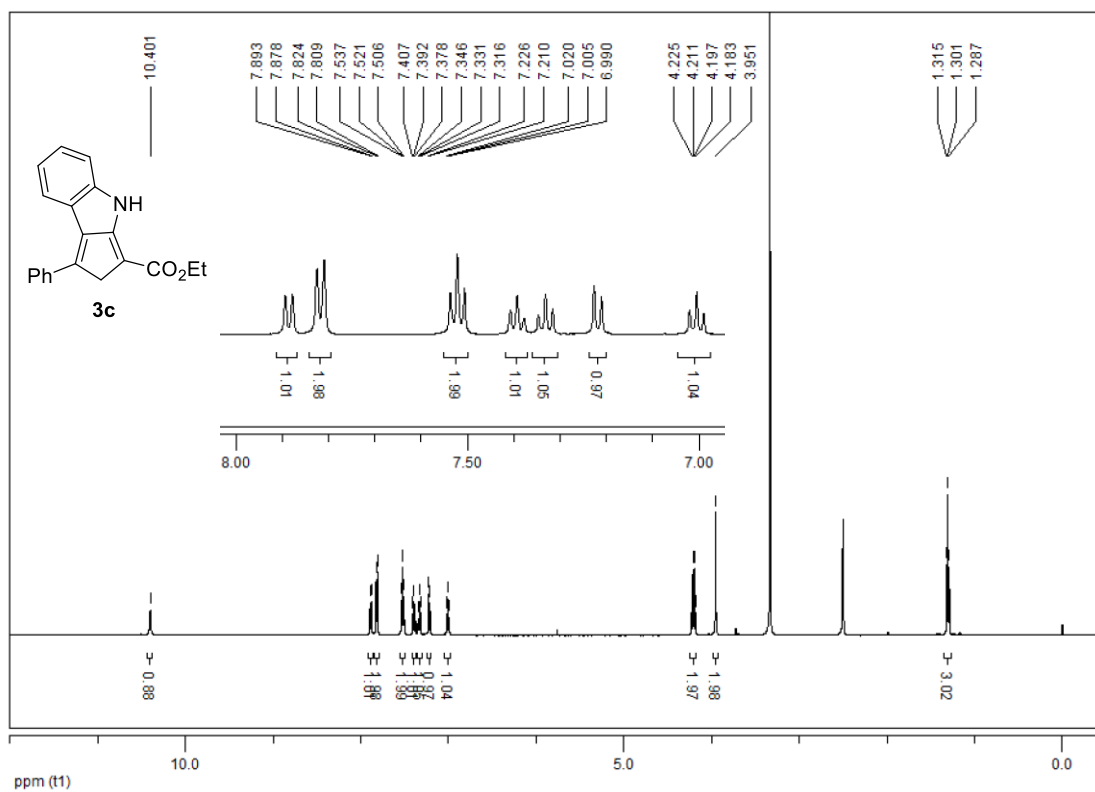

**<sup>13</sup>C{<sup>1</sup>H} NMR (126 MHz, DMSO-d<sub>6</sub>)**

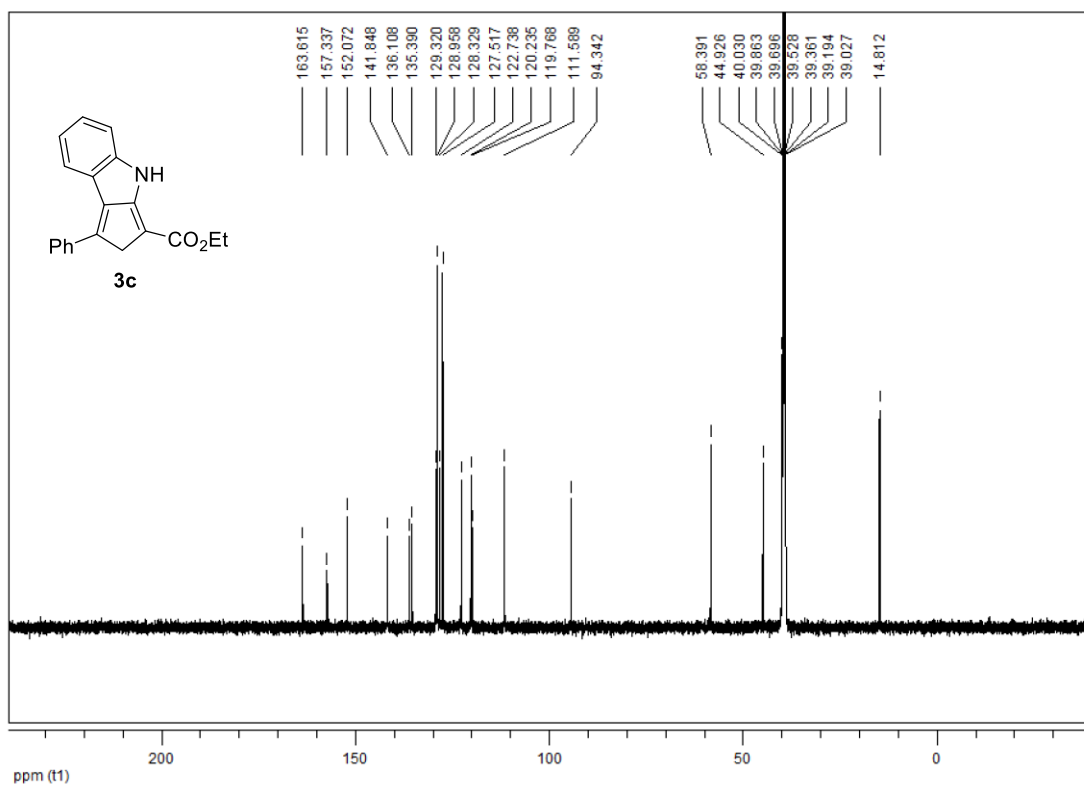

**<sup>1</sup>H NMR (500 MHz, DMSO-d<sub>6</sub>)**

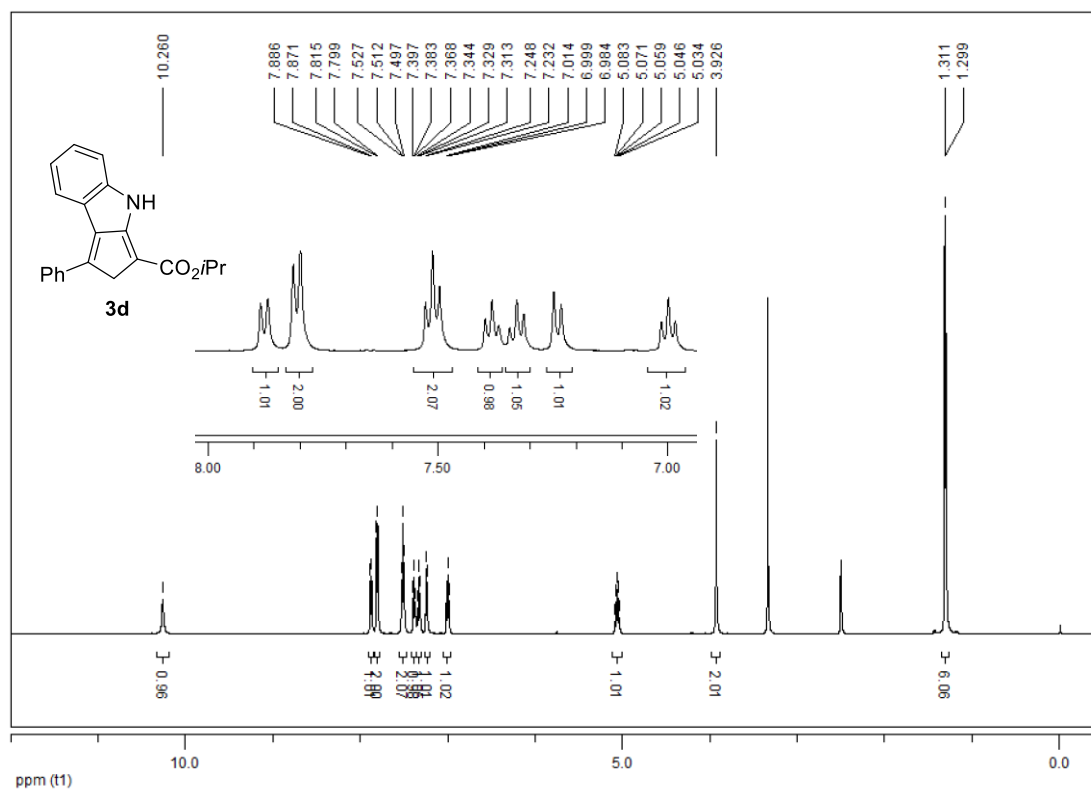

**<sup>13</sup>C{<sup>1</sup>H} NMR (126 MHz, DMSO-d<sub>6</sub>)**

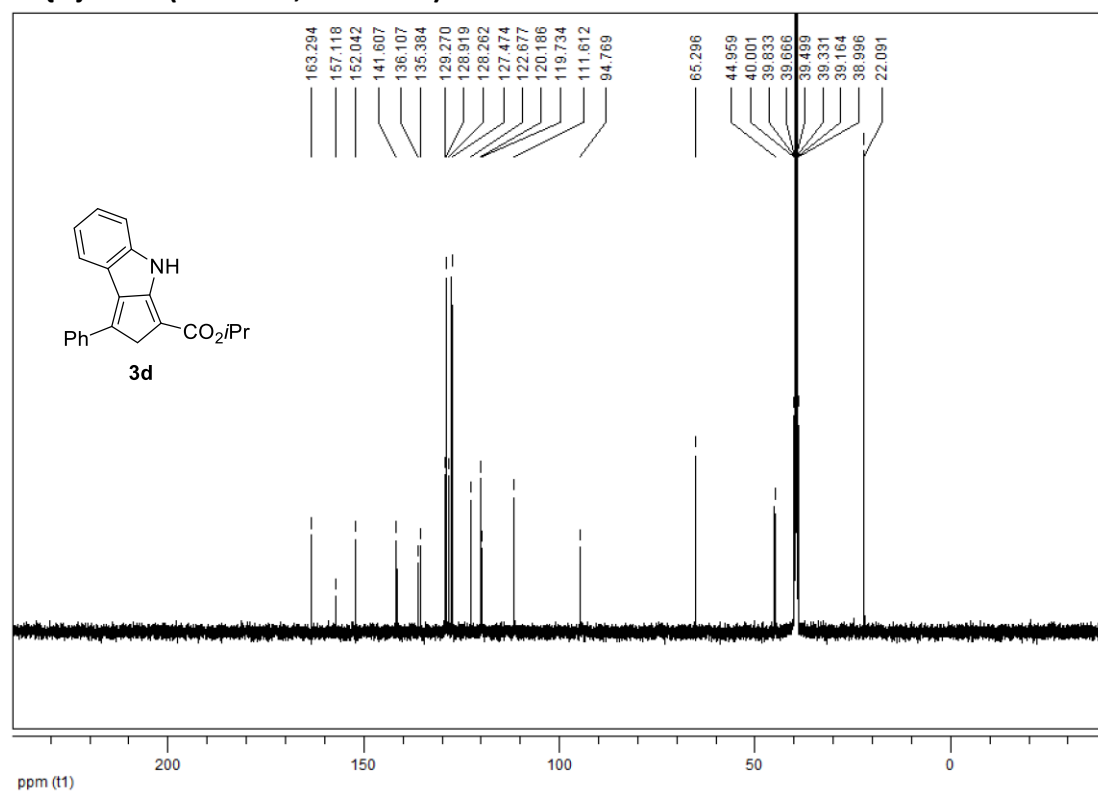

**<sup>1</sup>H NMR (500 MHz, DMSO-d<sub>6</sub>)**

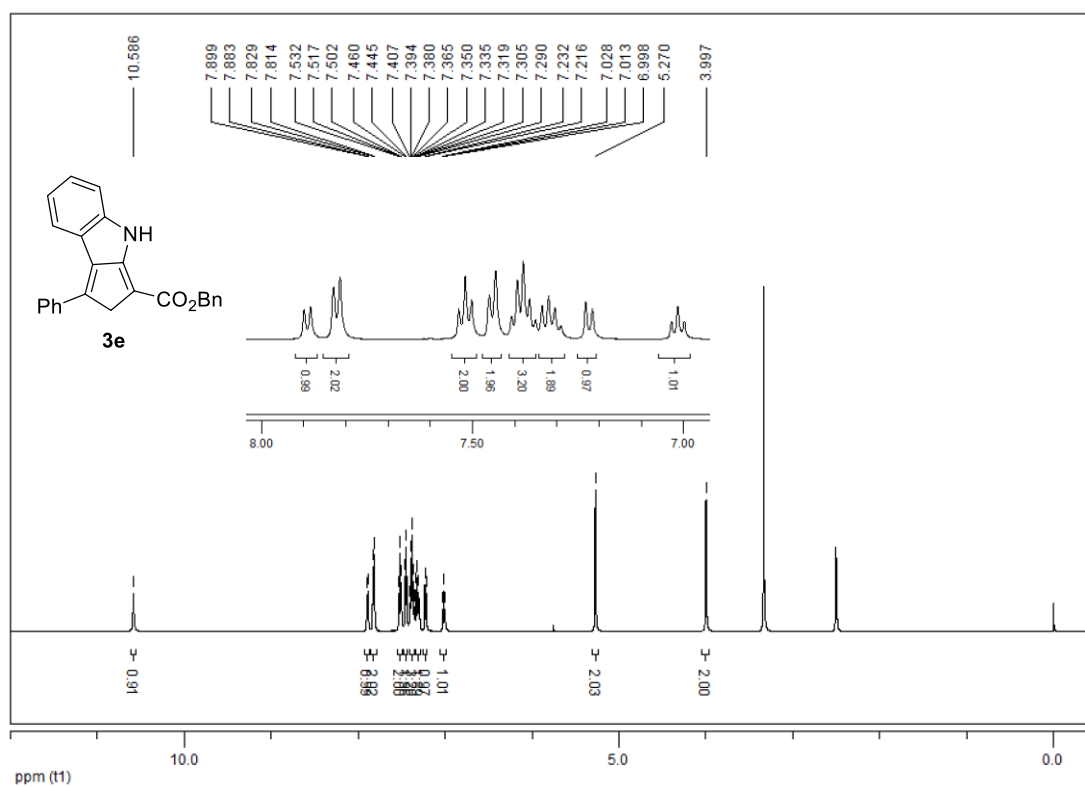

**<sup>13</sup>C{<sup>1</sup>H} NMR (126 MHz, DMSO-d<sub>6</sub>)**

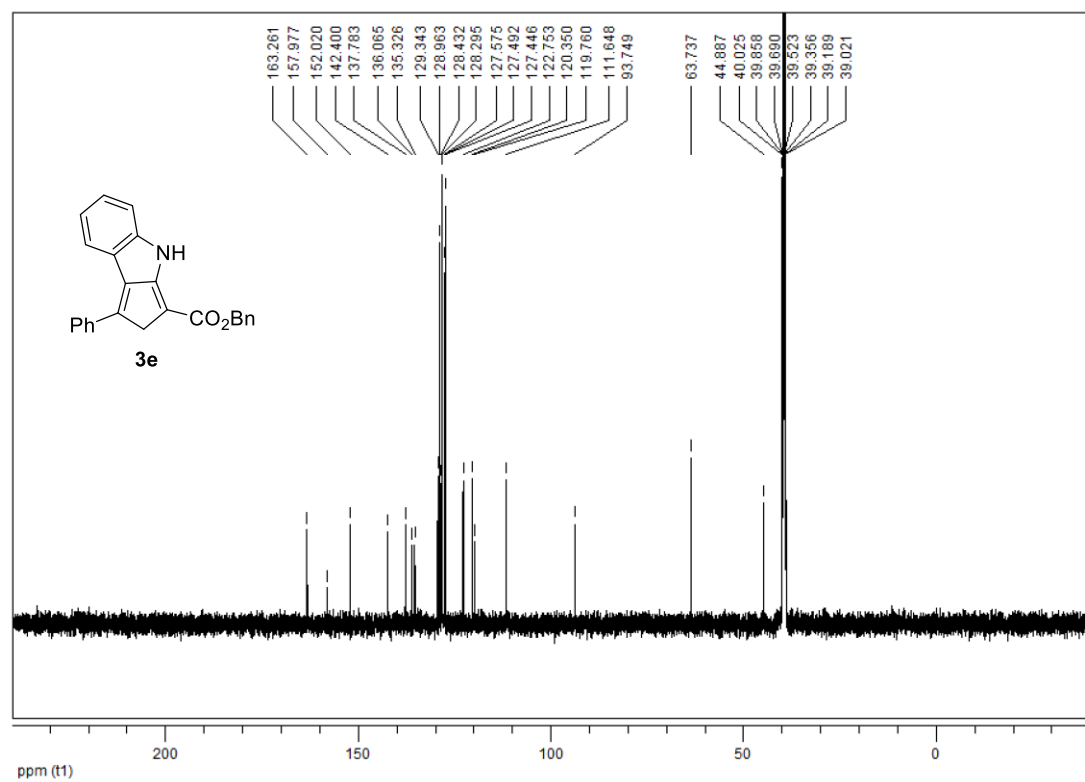

**<sup>1</sup>H NMR (500 MHz, CDCl<sub>3</sub>)**

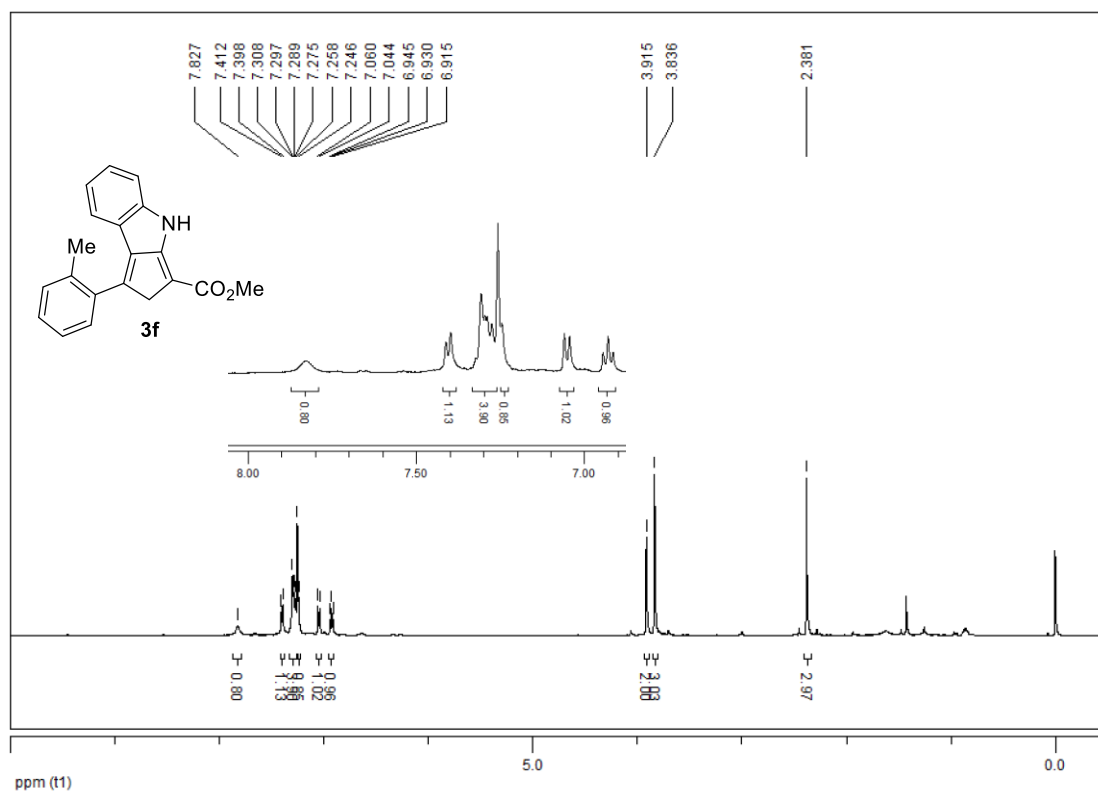

**<sup>13</sup>C{<sup>1</sup>H} NMR (126 MHz, CDCl<sub>3</sub>)**

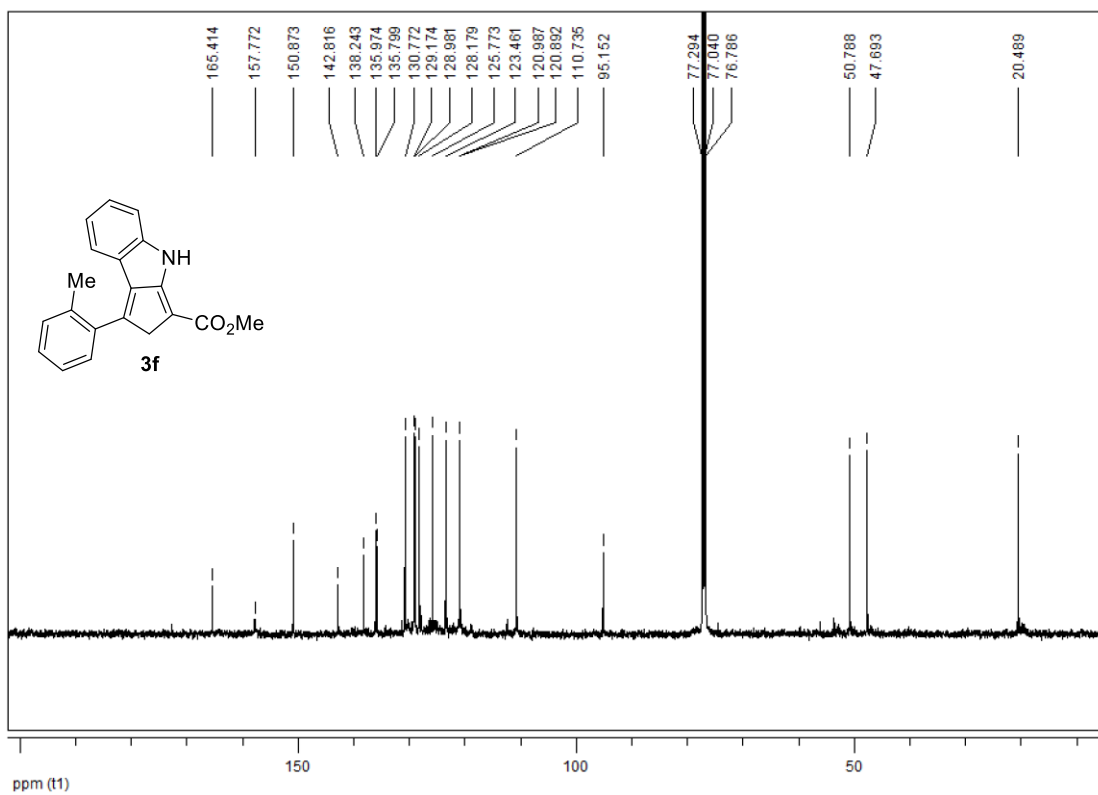

**<sup>1</sup>H NMR (500 MHz, CDCl<sub>3</sub>)**

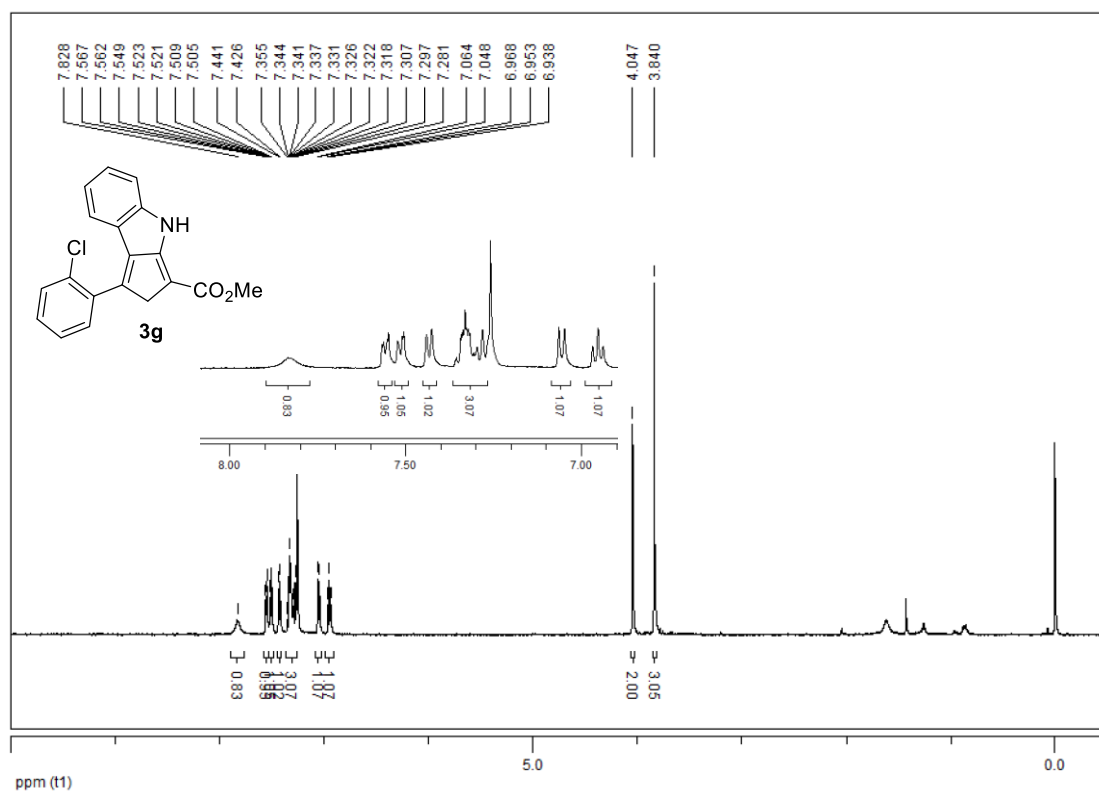

**<sup>13</sup>C{<sup>1</sup>H} NMR (126 MHz, CDCl<sub>3</sub>)**

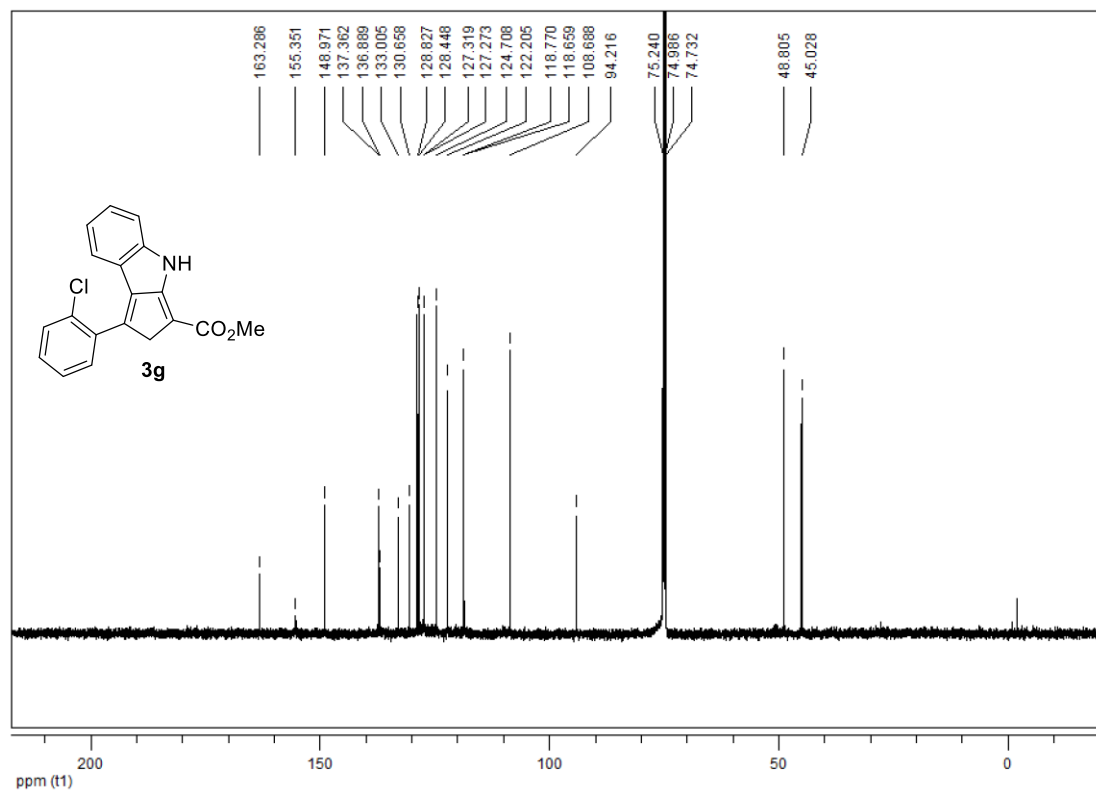

**<sup>1</sup>H NMR (500 MHz, DMSO-d<sub>6</sub>)**

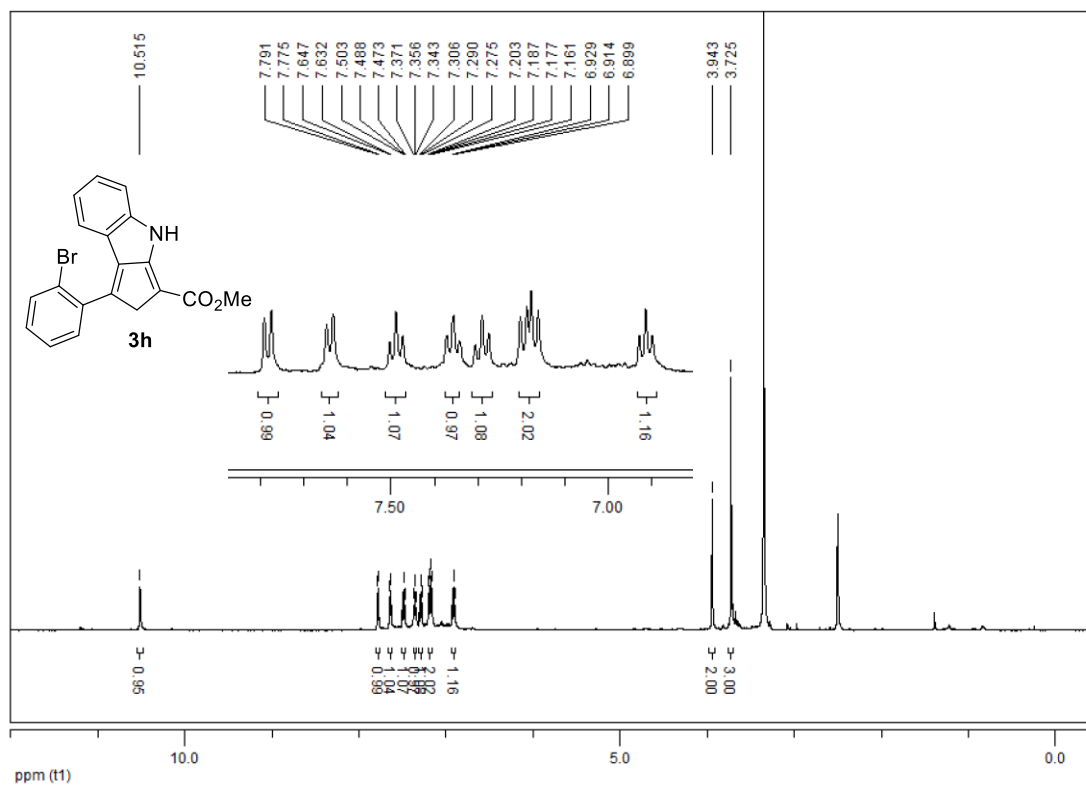

**<sup>13</sup>C{<sup>1</sup>H} NMR (126 MHz, DMSO-d<sub>6</sub>)**

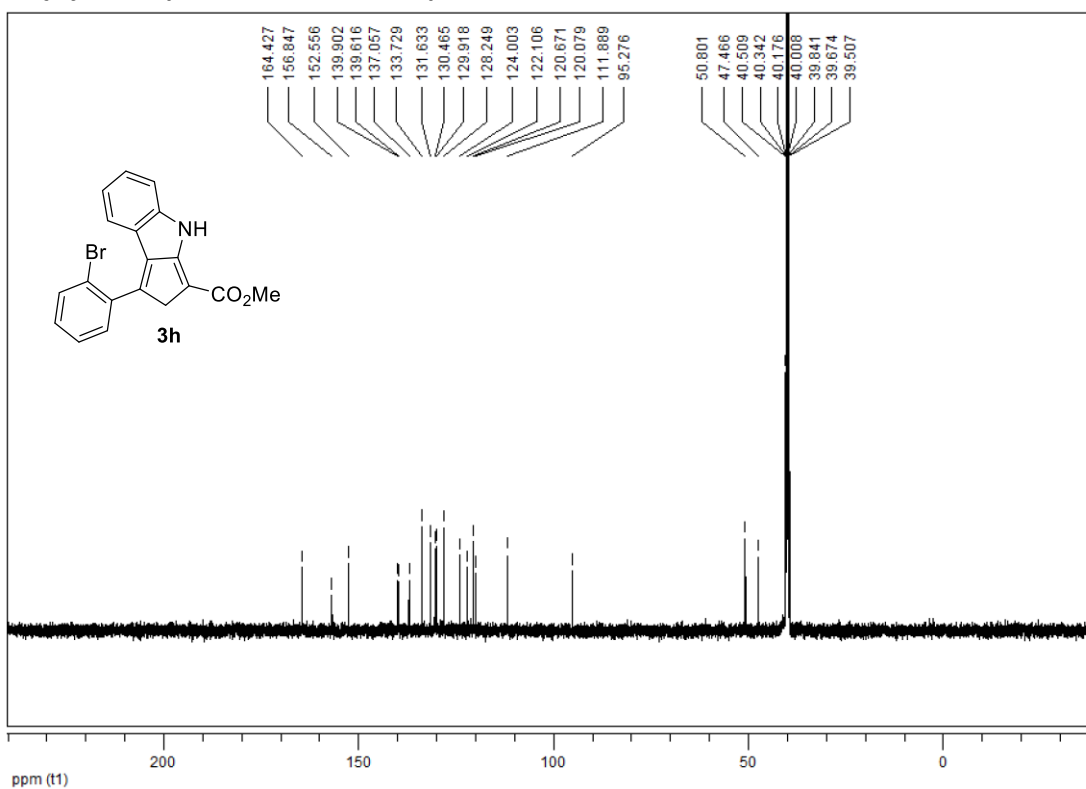

**<sup>1</sup>H NMR (500 MHz, DMSO-d<sub>6</sub>)**

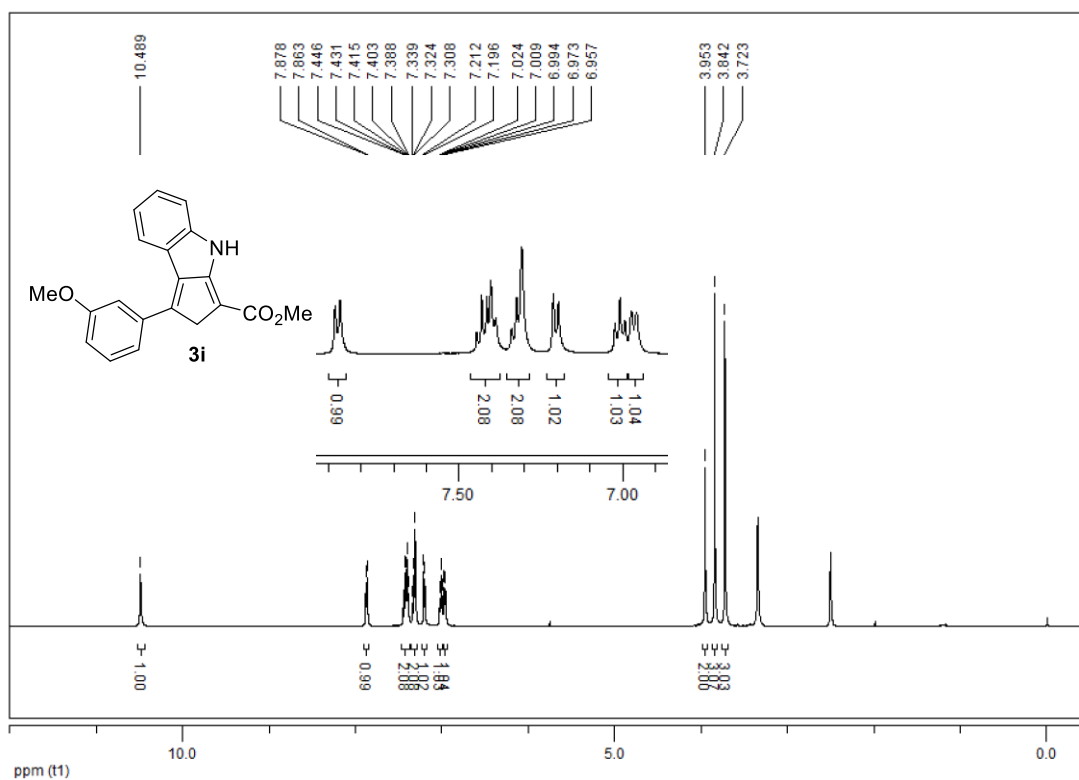

**<sup>13</sup>C{<sup>1</sup>H} NMR (126 MHz, DMSO-d<sub>6</sub>)**

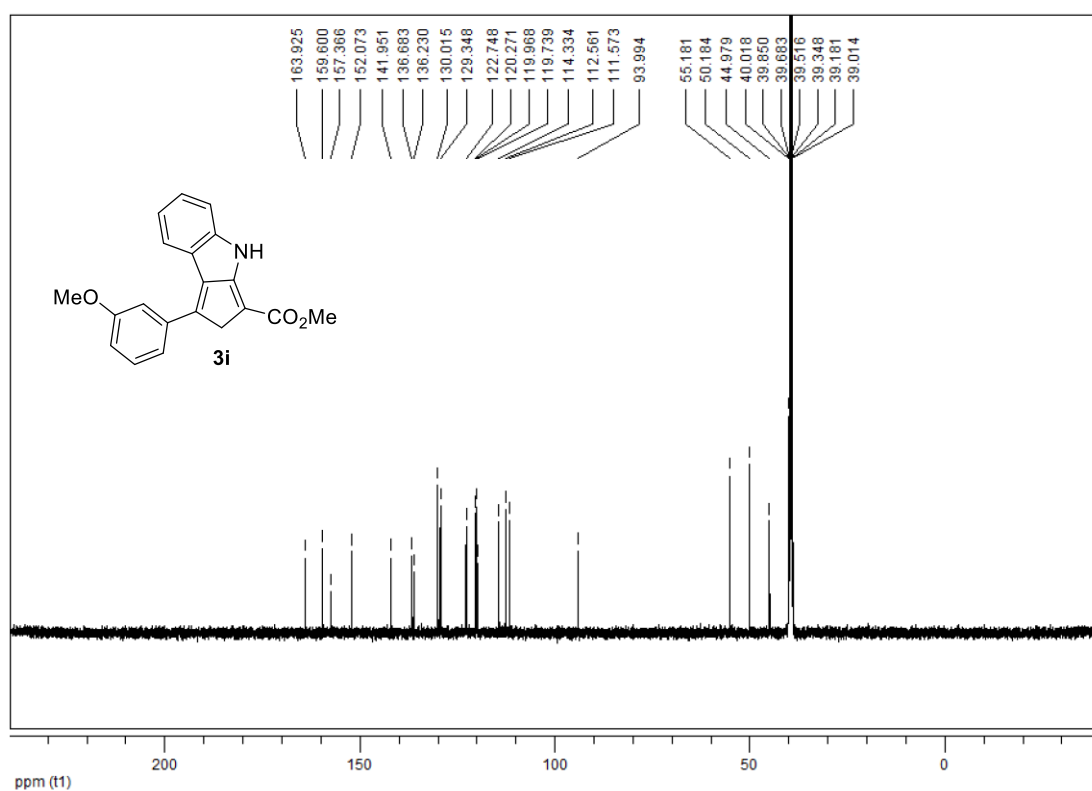



**<sup>1</sup>H NMR (500 MHz, DMSO-d<sub>6</sub>)**

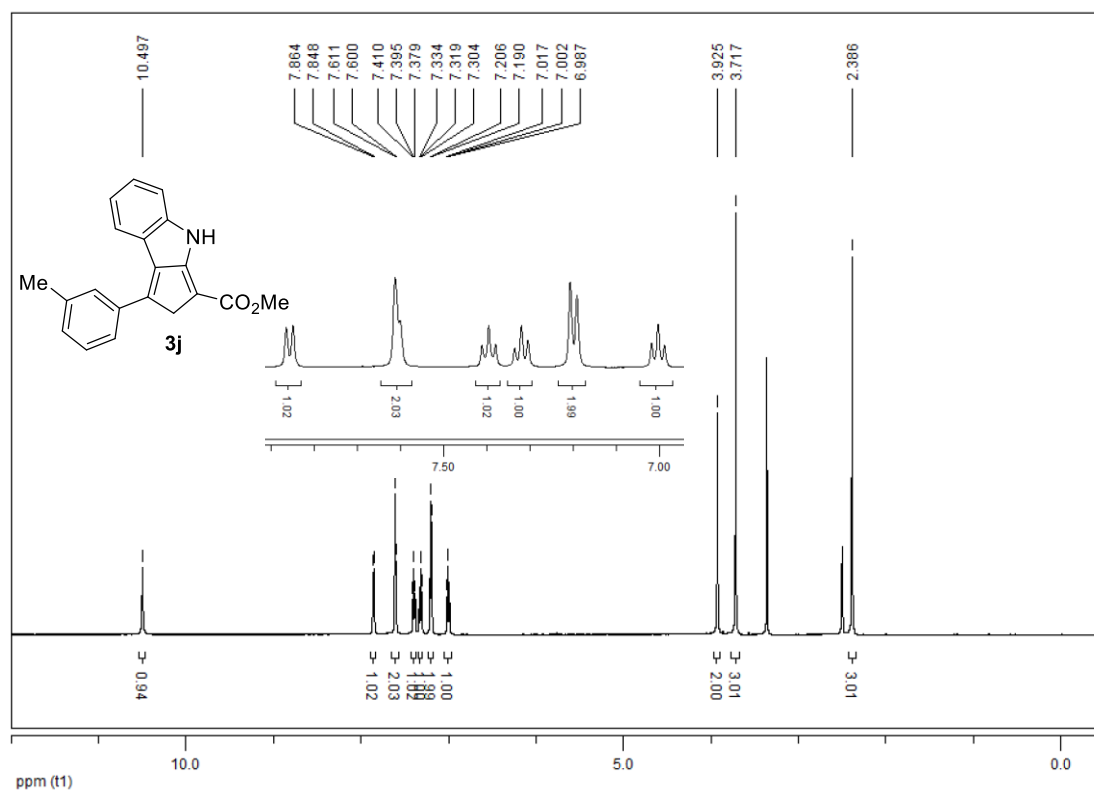

**<sup>13</sup>C{<sup>1</sup>H} NMR (126 MHz, DMSO-d<sub>6</sub>)**

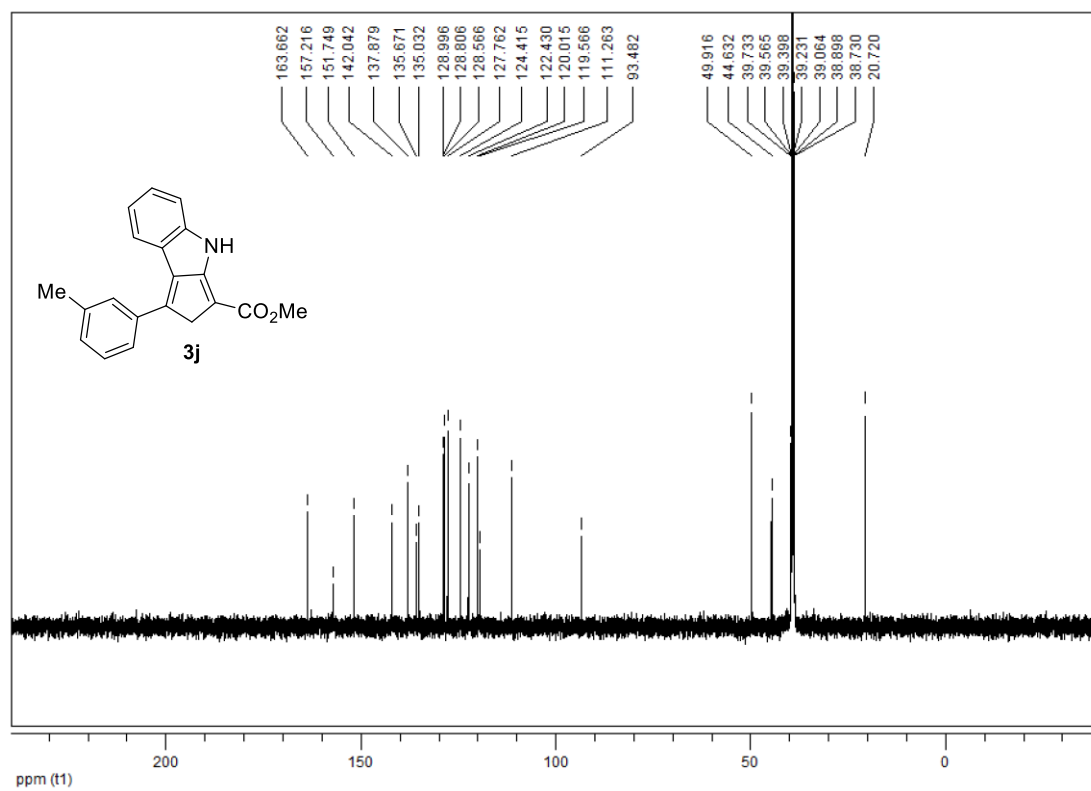

**<sup>1</sup>H NMR (500 MHz, DMSO-d<sub>6</sub>)**

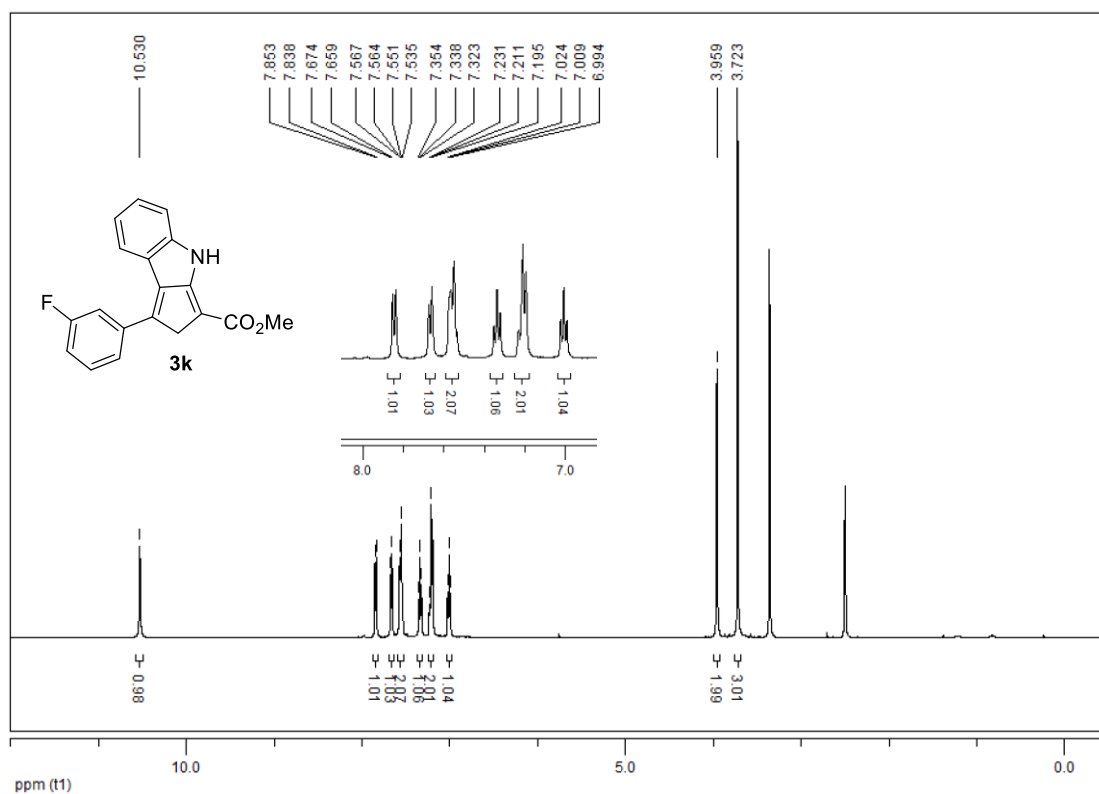

**<sup>13</sup>C{<sup>1</sup>H} NMR (126 MHz, DMSO-d<sub>6</sub>)**

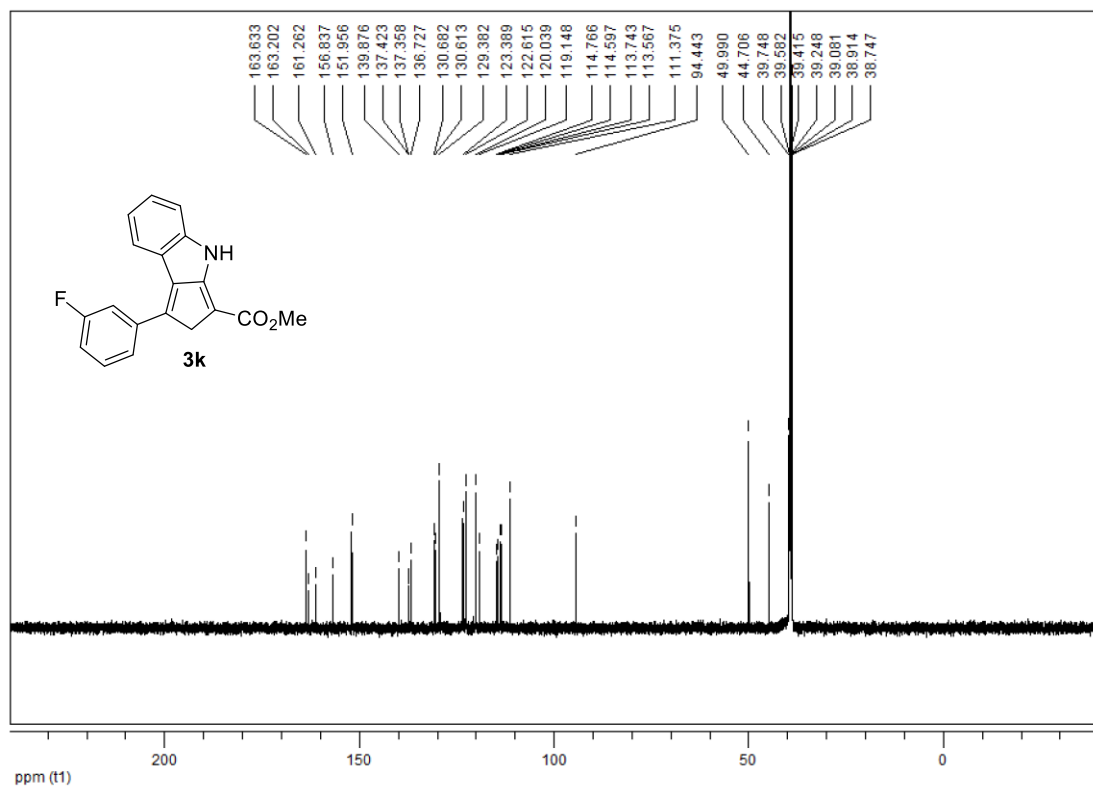

**<sup>19</sup>F NMR (376 MHz, DMSO-d<sub>6</sub>)**

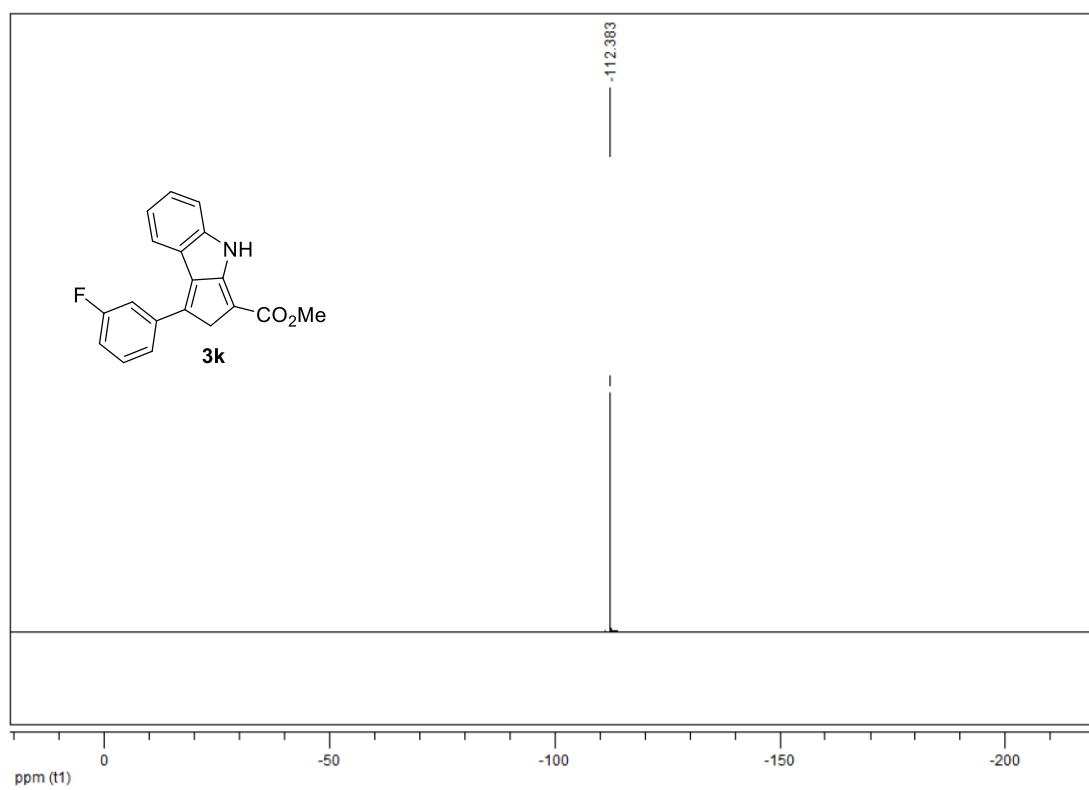

**<sup>1</sup>H NMR (500 MHz, DMSO-d<sub>6</sub>)**

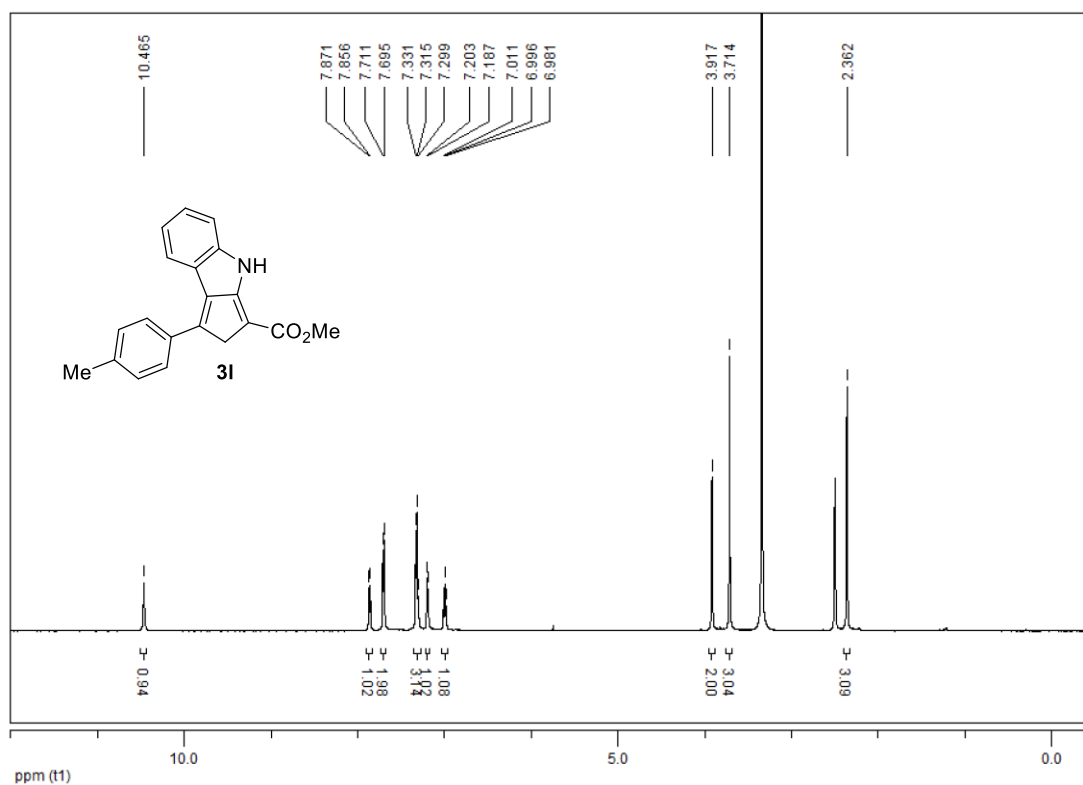

**<sup>13</sup>C{<sup>1</sup>H} NMR (126 MHz, DMSO-d<sub>6</sub>)**

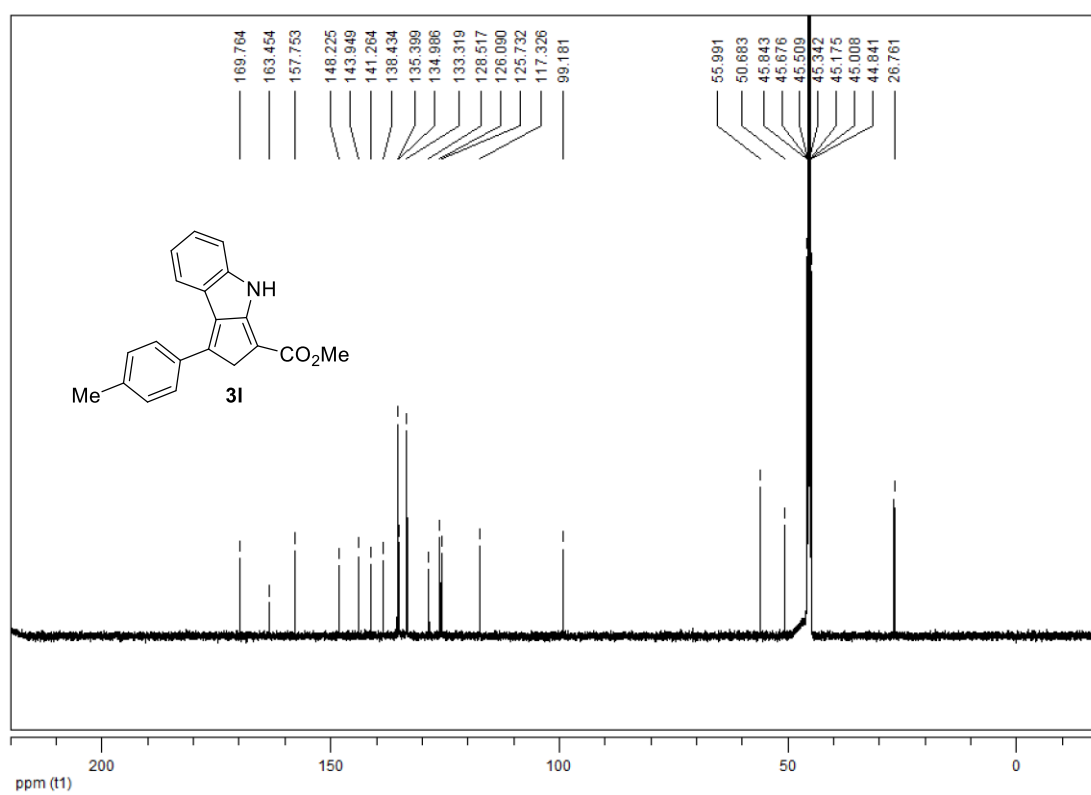

**<sup>1</sup>H NMR (500 MHz, DMSO-d<sub>6</sub>)**

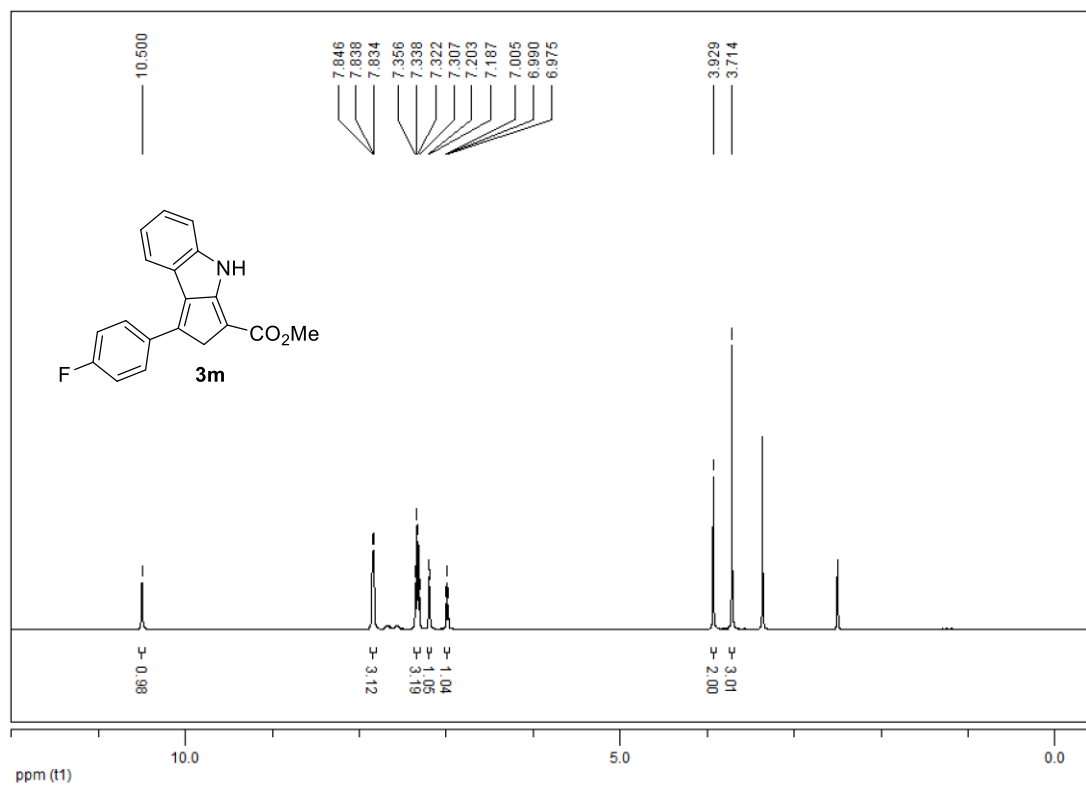

**<sup>13</sup>C{<sup>1</sup>H} NMR (126 MHz, DMSO-d<sub>6</sub>)**

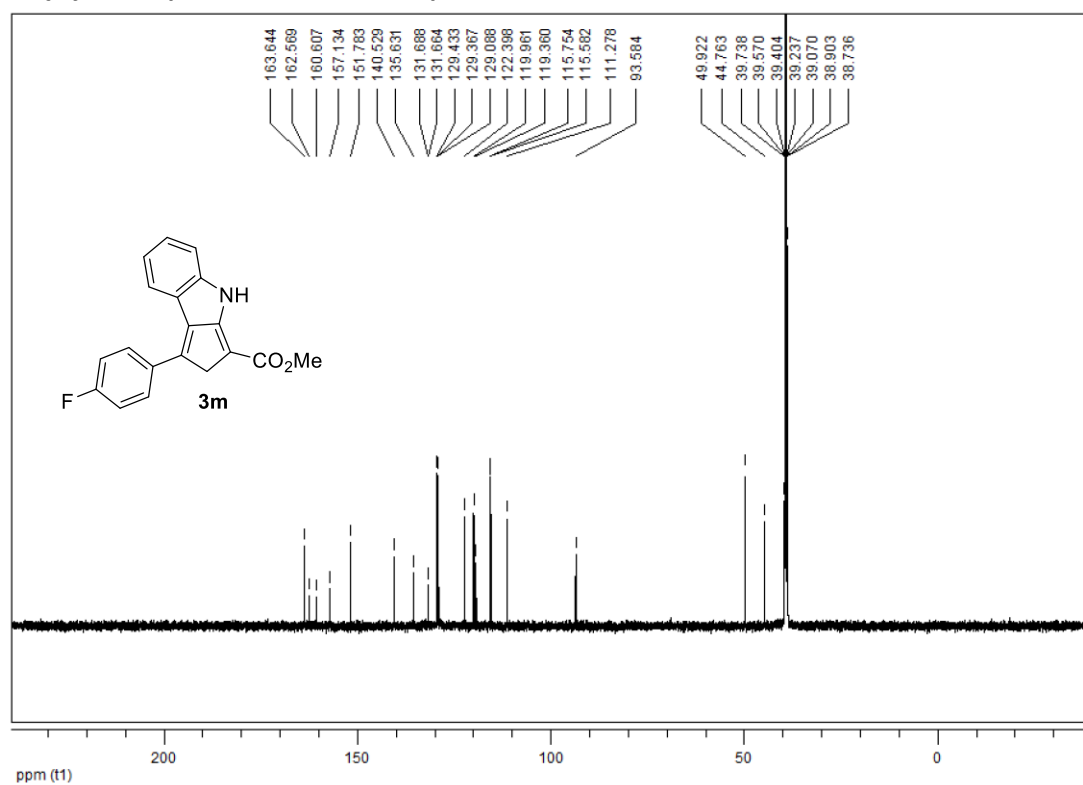

**<sup>19</sup>F NMR (376 MHz, DMSO-d<sub>6</sub>)**

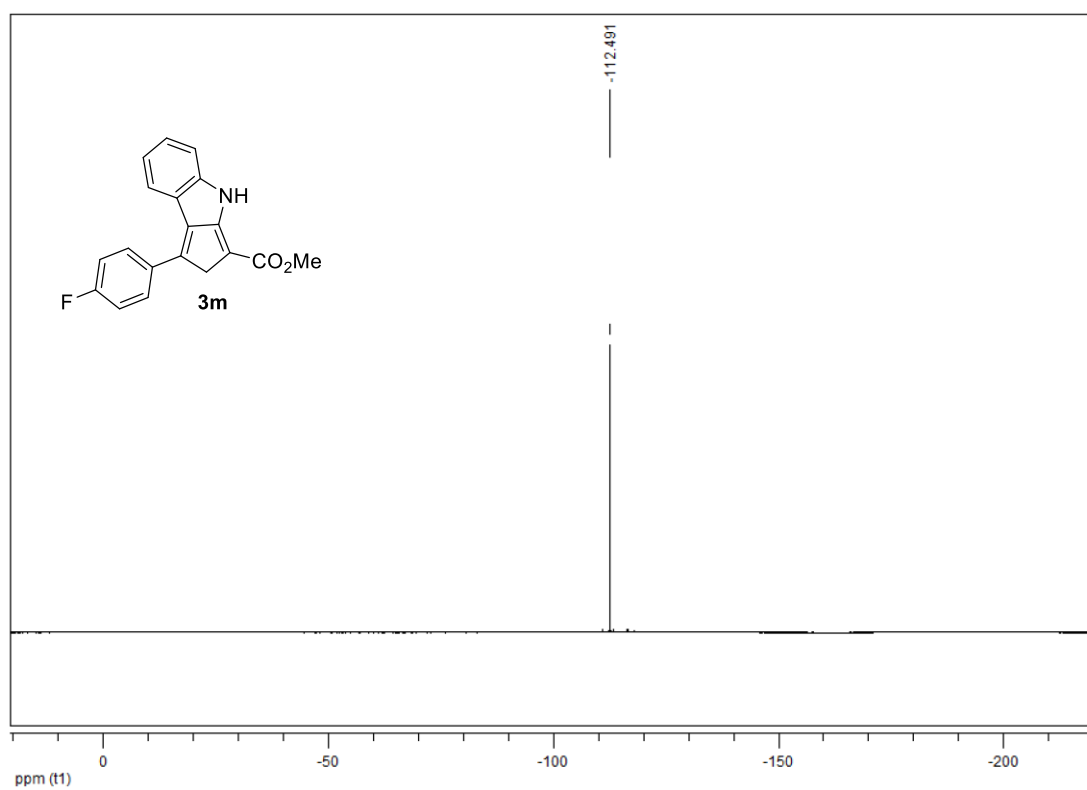

**<sup>1</sup>H NMR (500 MHz, DMSO-d<sub>6</sub>)**

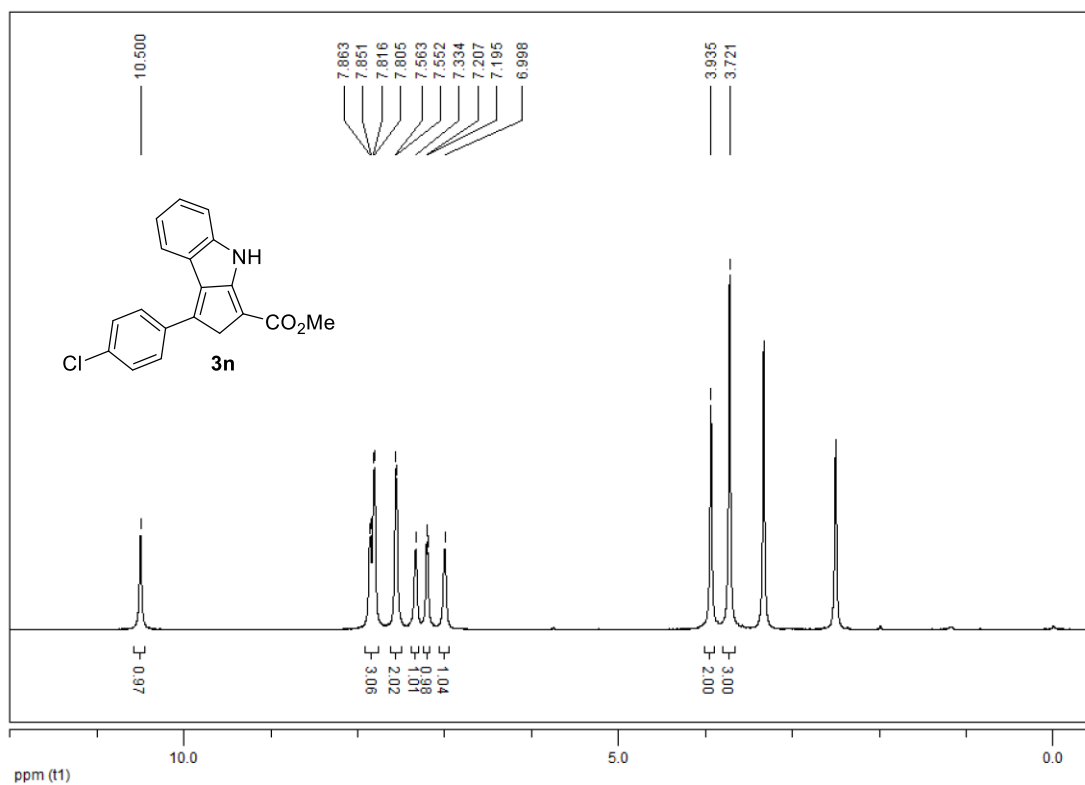

**<sup>13</sup>C{<sup>1</sup>H} NMR (126 MHz, DMSO-d<sub>6</sub>)**

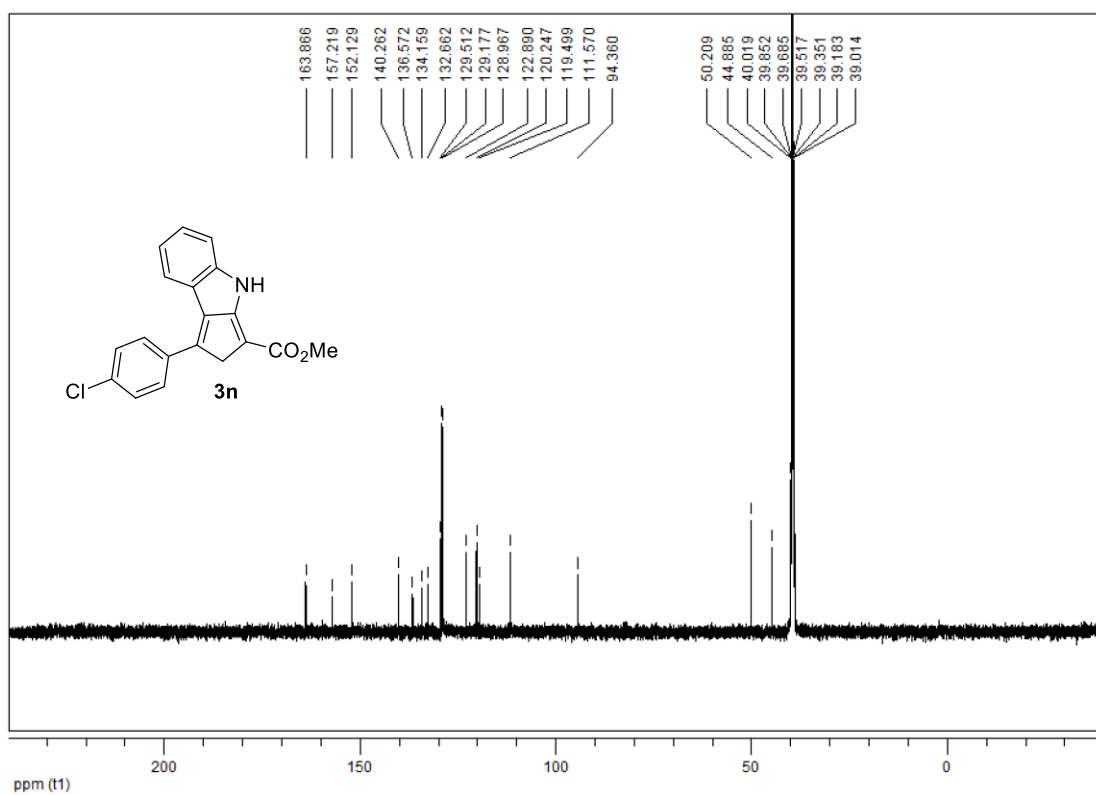

**<sup>1</sup>H NMR (500 MHz, DMSO-d<sub>6</sub>)**

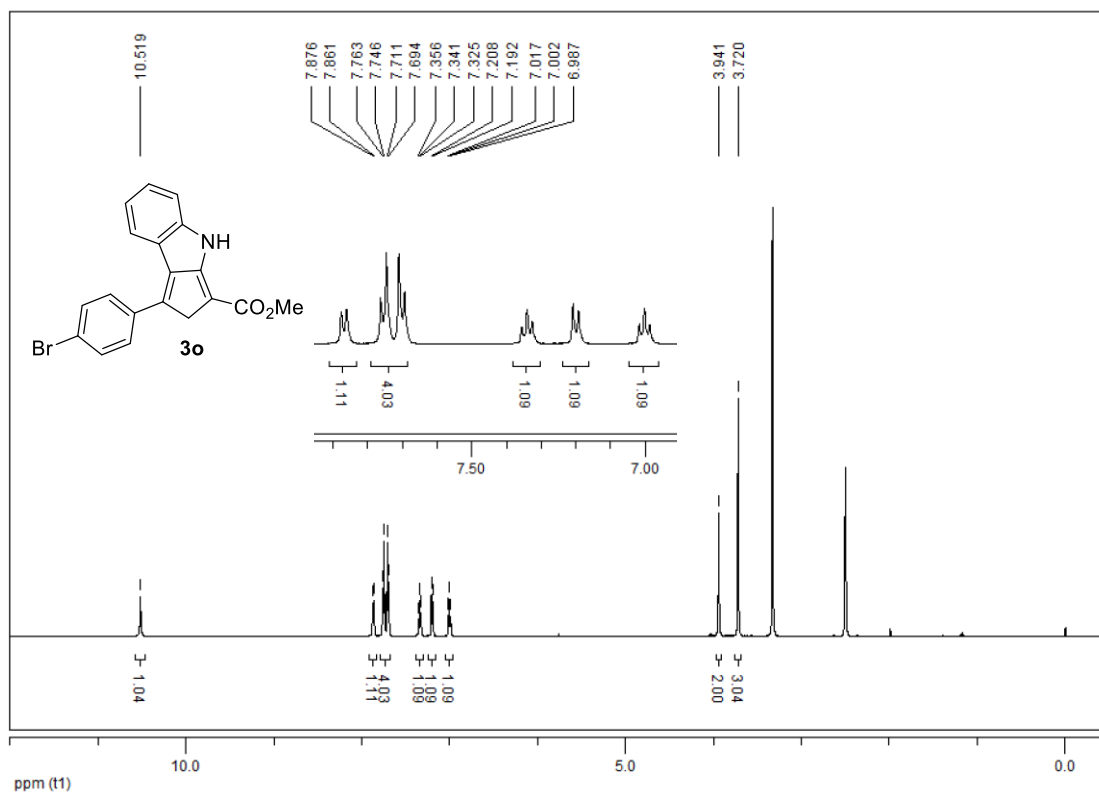

**<sup>13</sup>C{<sup>1</sup>H} NMR (126 MHz, DMSO-d<sub>6</sub>)**

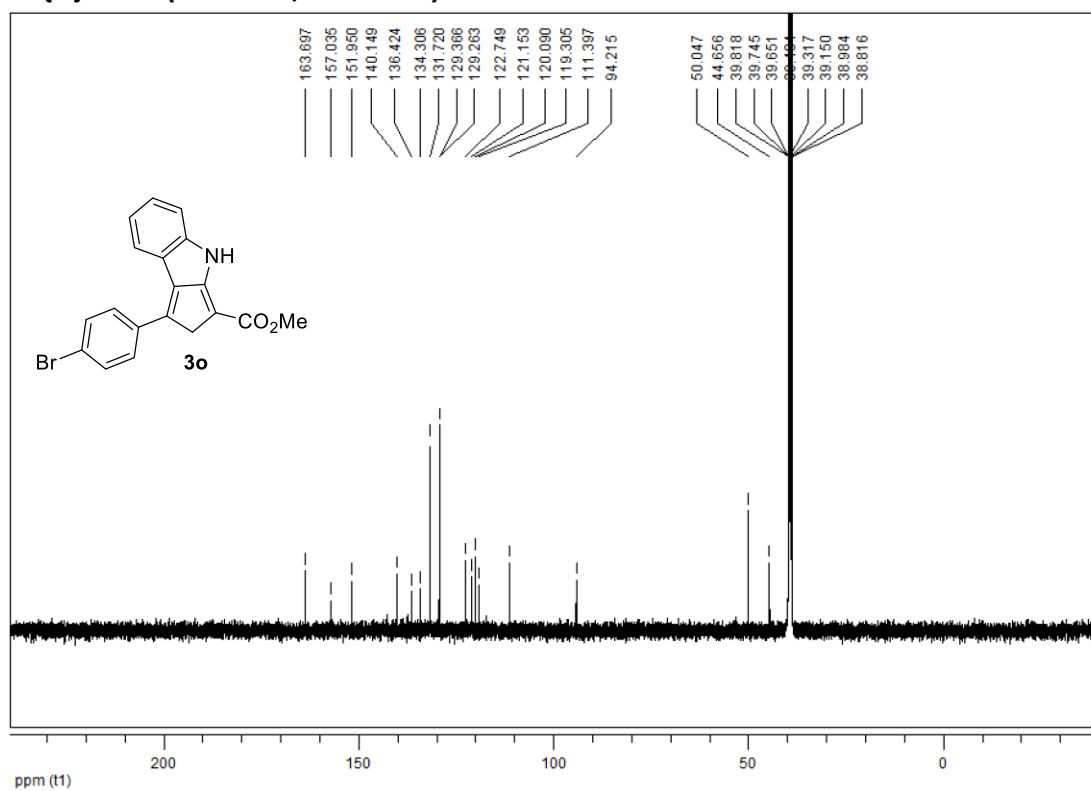



**<sup>1</sup>H NMR (500 MHz, DMSO-d<sub>6</sub>)**

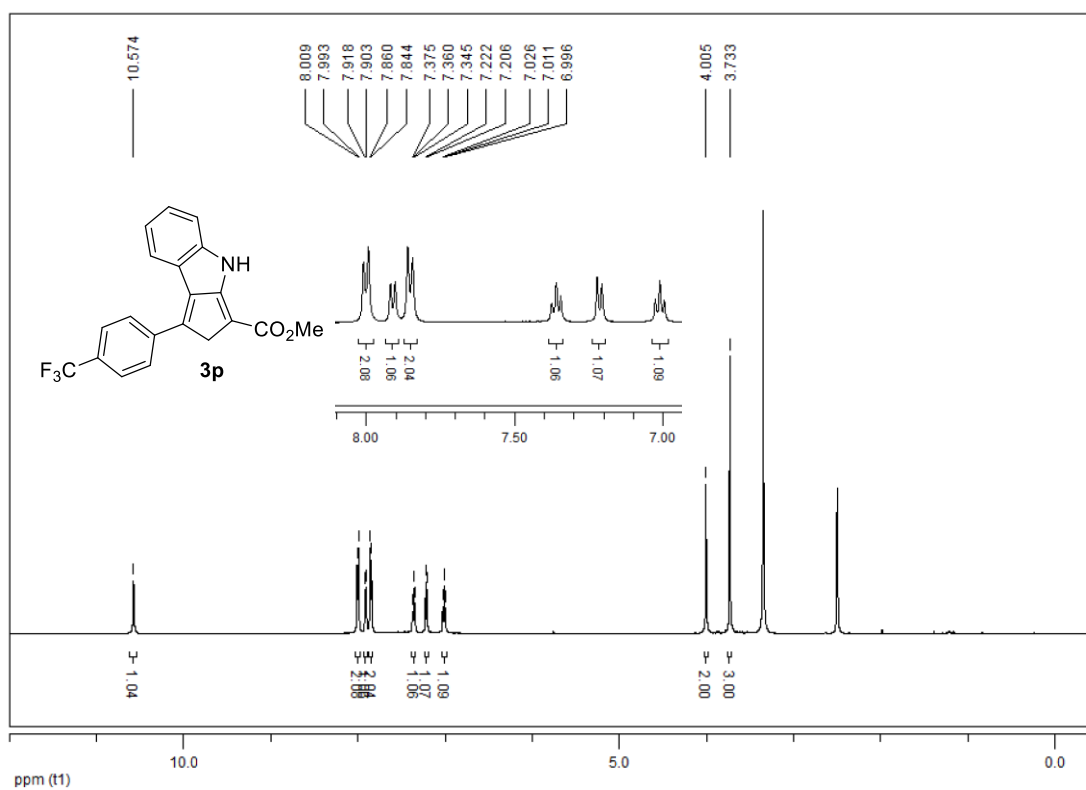

**<sup>13</sup>C{<sup>1</sup>H} NMR (126 MHz, DMSO-d<sub>6</sub>)**

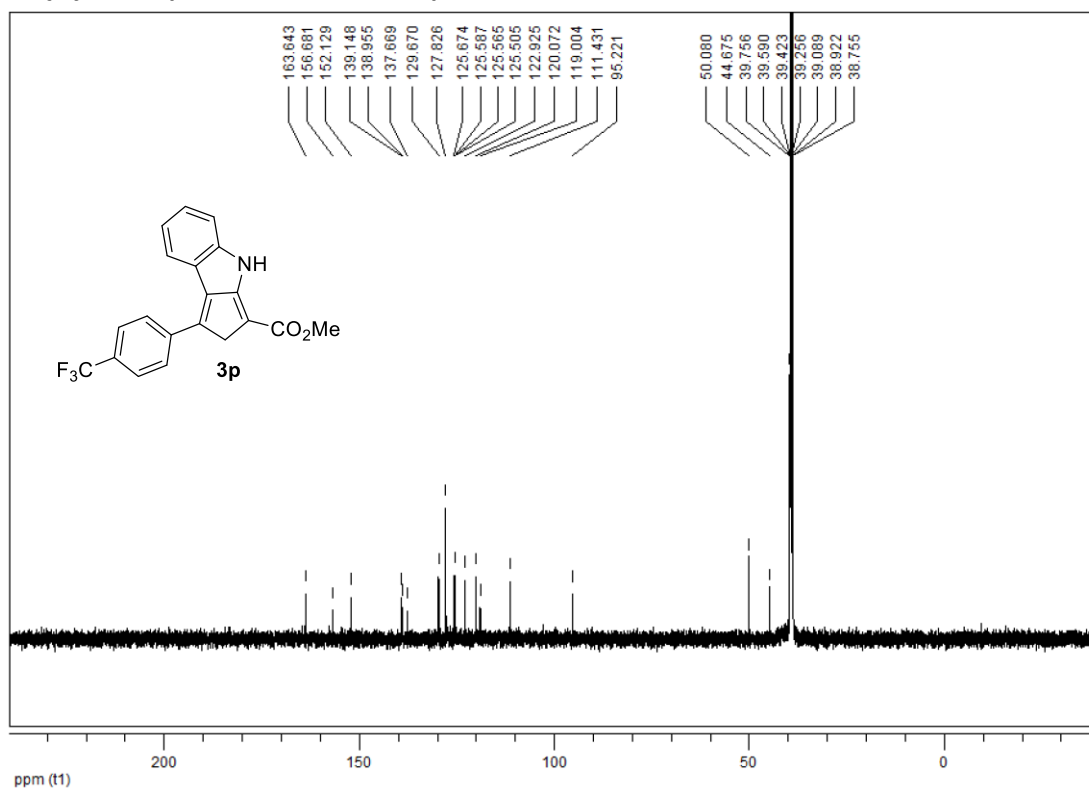

**<sup>19</sup>F NMR (376 MHz, DMSO-d<sub>6</sub>)**

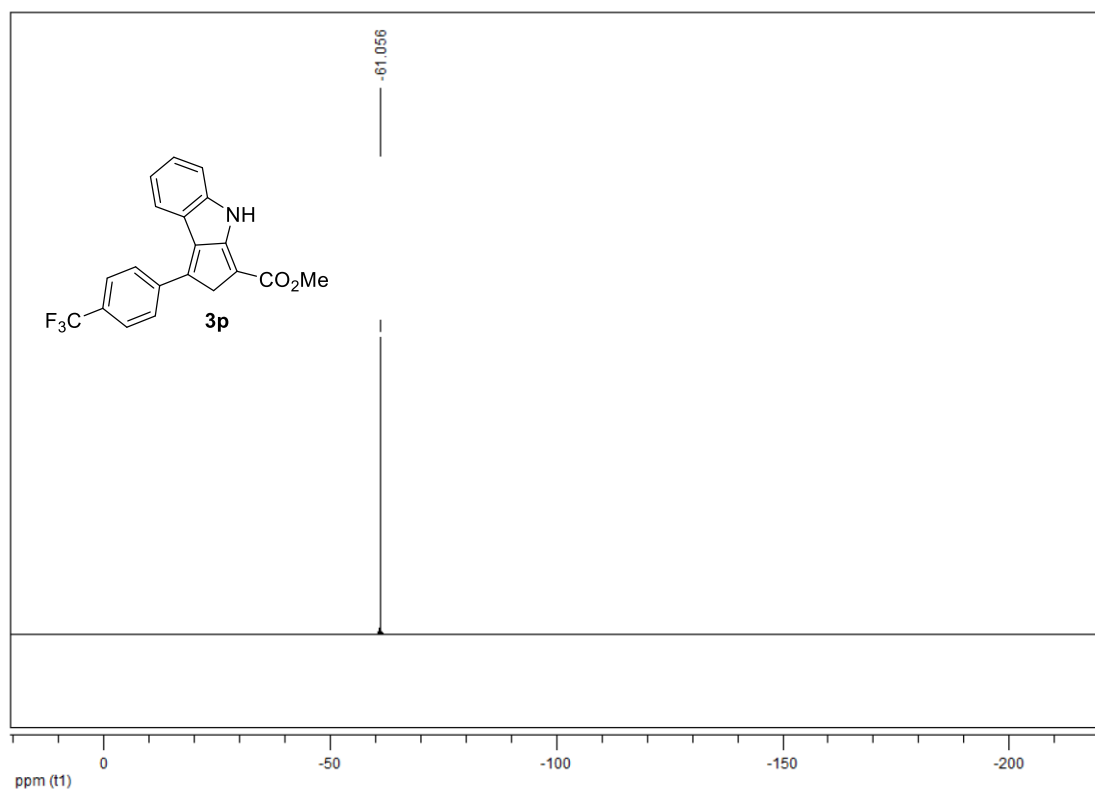

**<sup>1</sup>H NMR (500 MHz, DMSO-d<sub>6</sub>)**

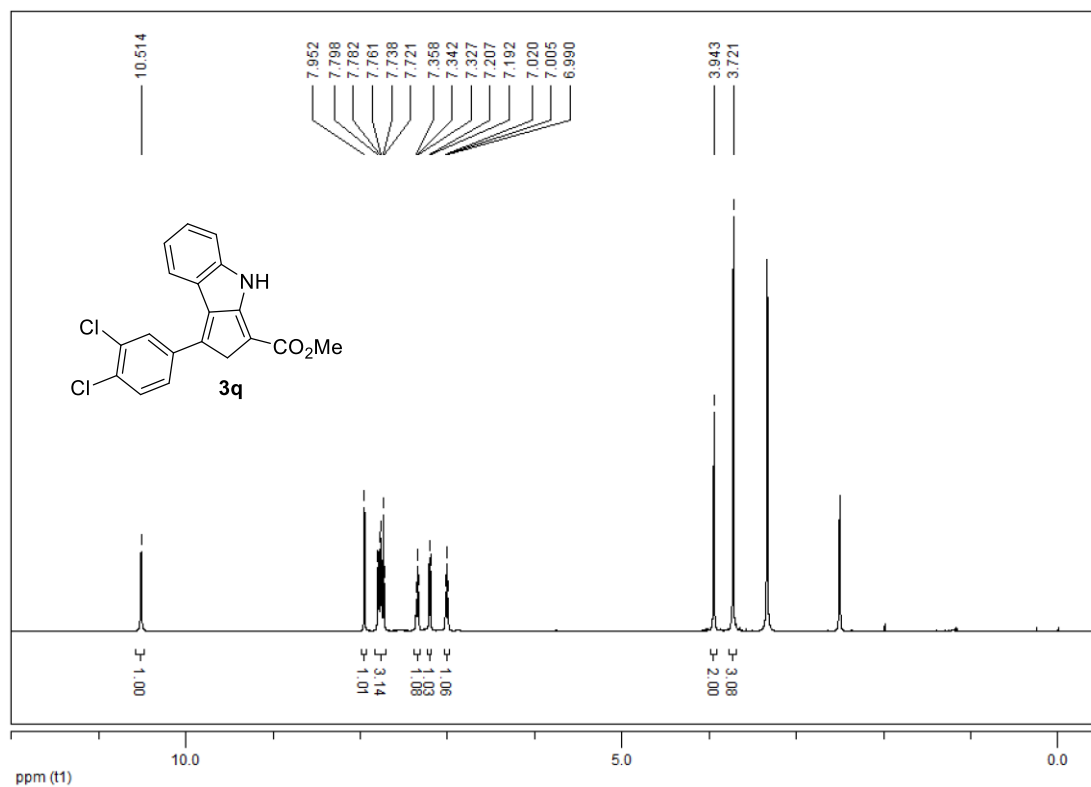

**<sup>13</sup>C{<sup>1</sup>H} NMR (126 MHz, DMSO-d<sub>6</sub>)**

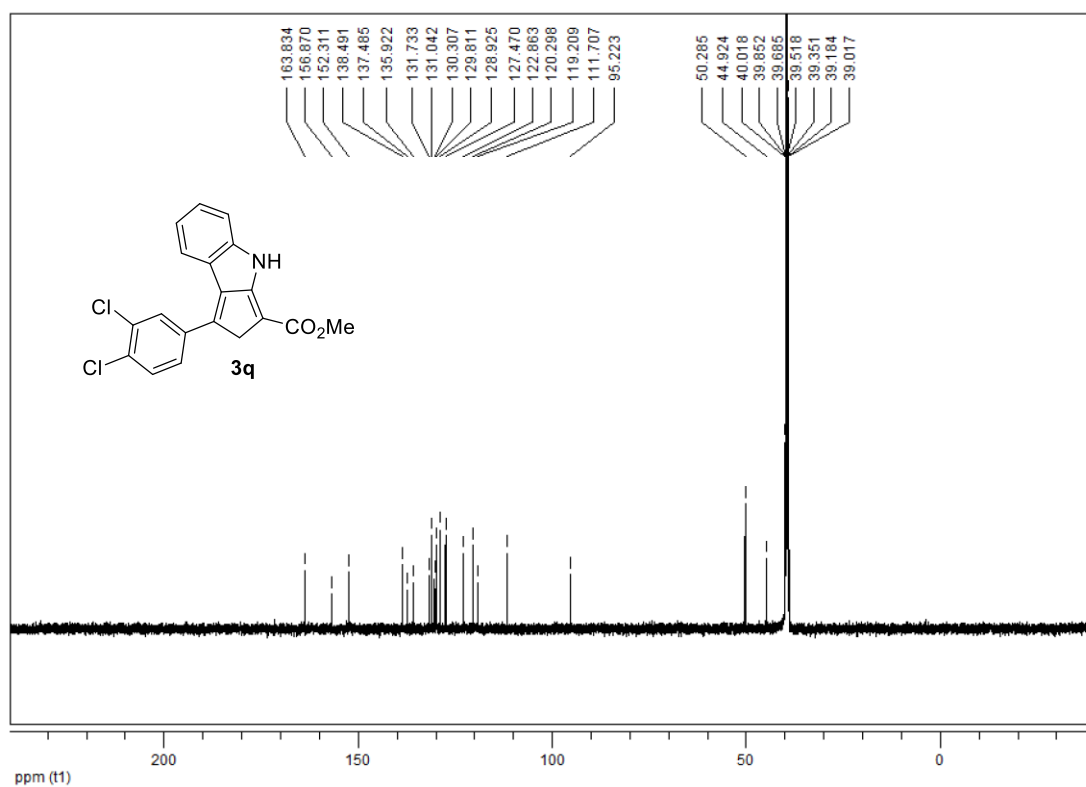

**<sup>1</sup>H NMR (500 MHz, DMSO-d<sub>6</sub>)**

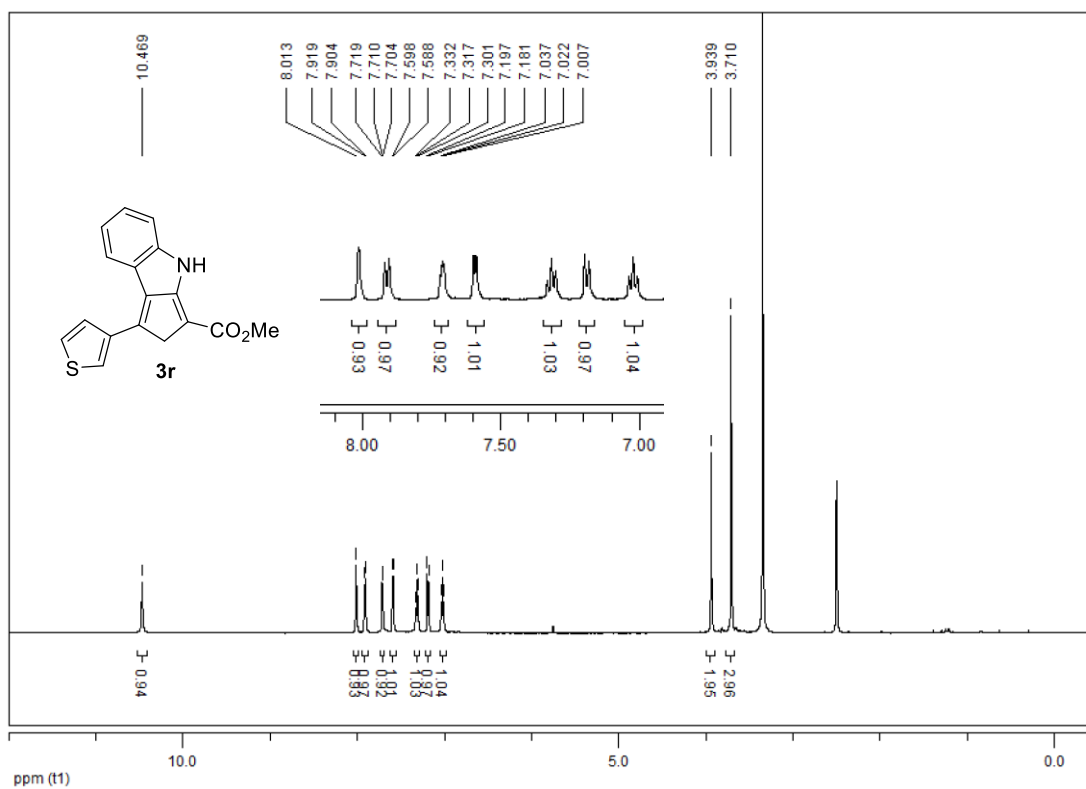

**<sup>13</sup>C{H} NMR (126 MHz, DMSO-d<sub>6</sub>)**

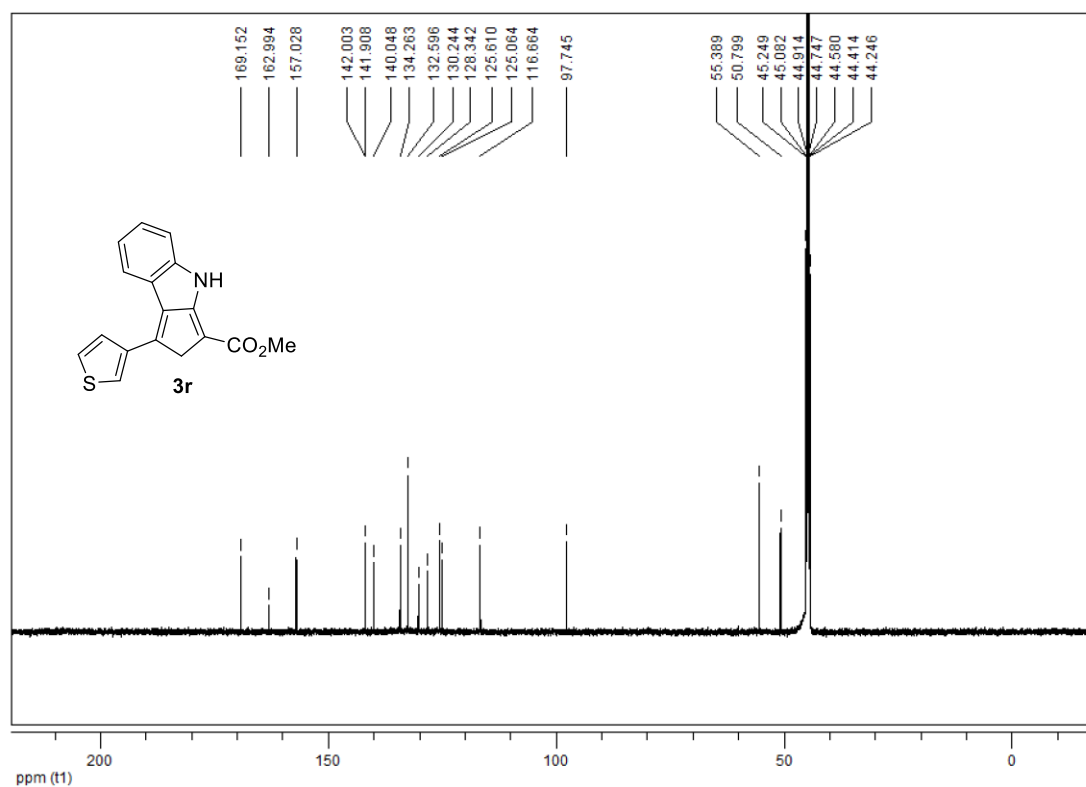

**<sup>1</sup>H NMR (500 MHz, DMSO-d<sub>6</sub>)**

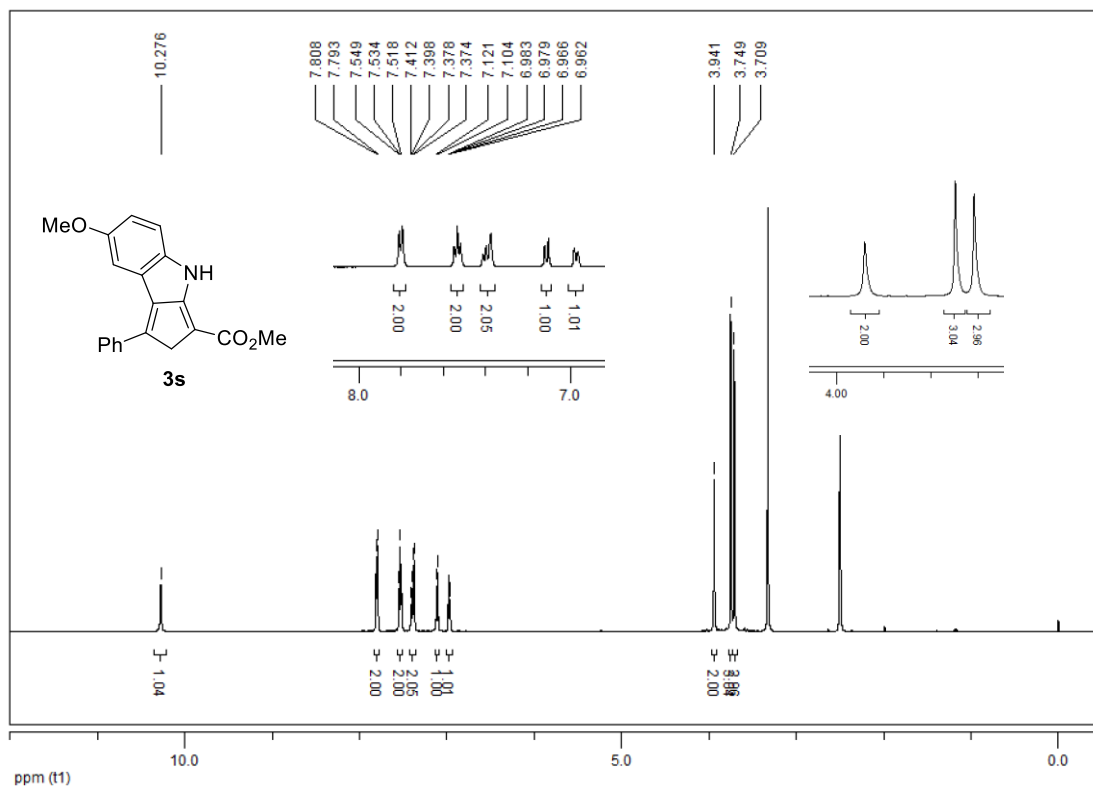

**<sup>13</sup>C{<sup>1</sup>H} NMR (126 MHz, DMSO-d<sub>6</sub>)**

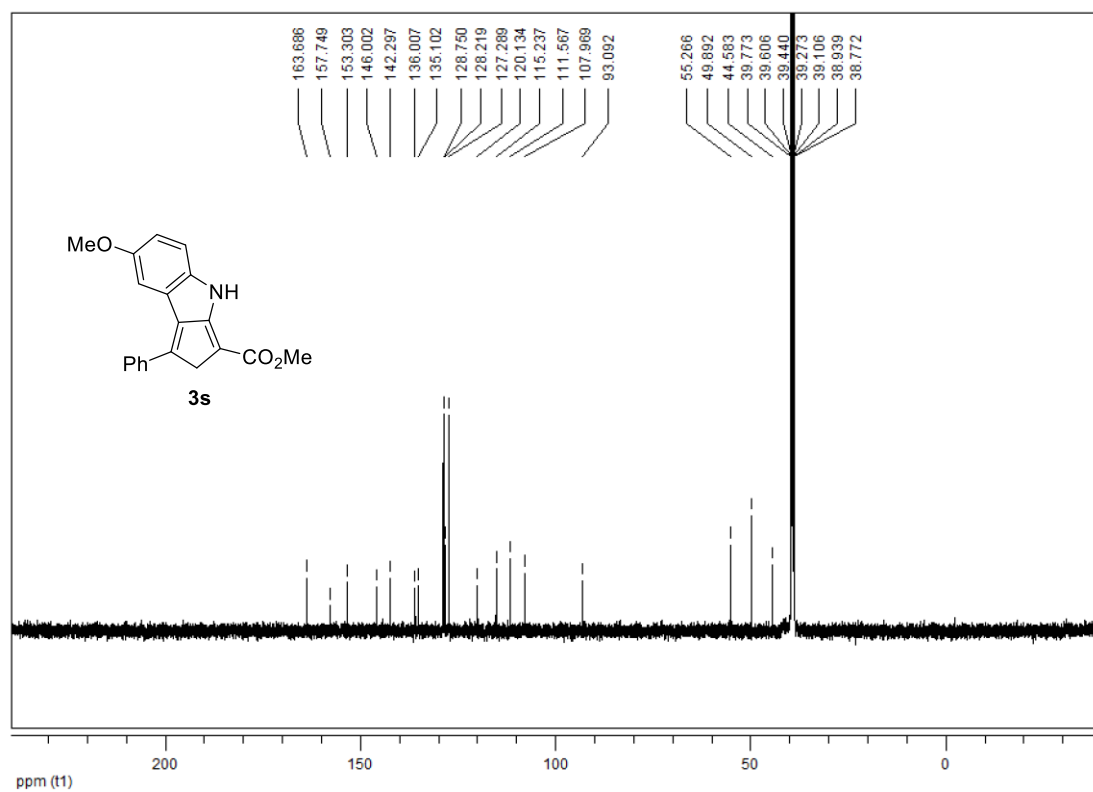

**<sup>1</sup>H NMR (500 MHz, DMSO-d<sub>6</sub>)**

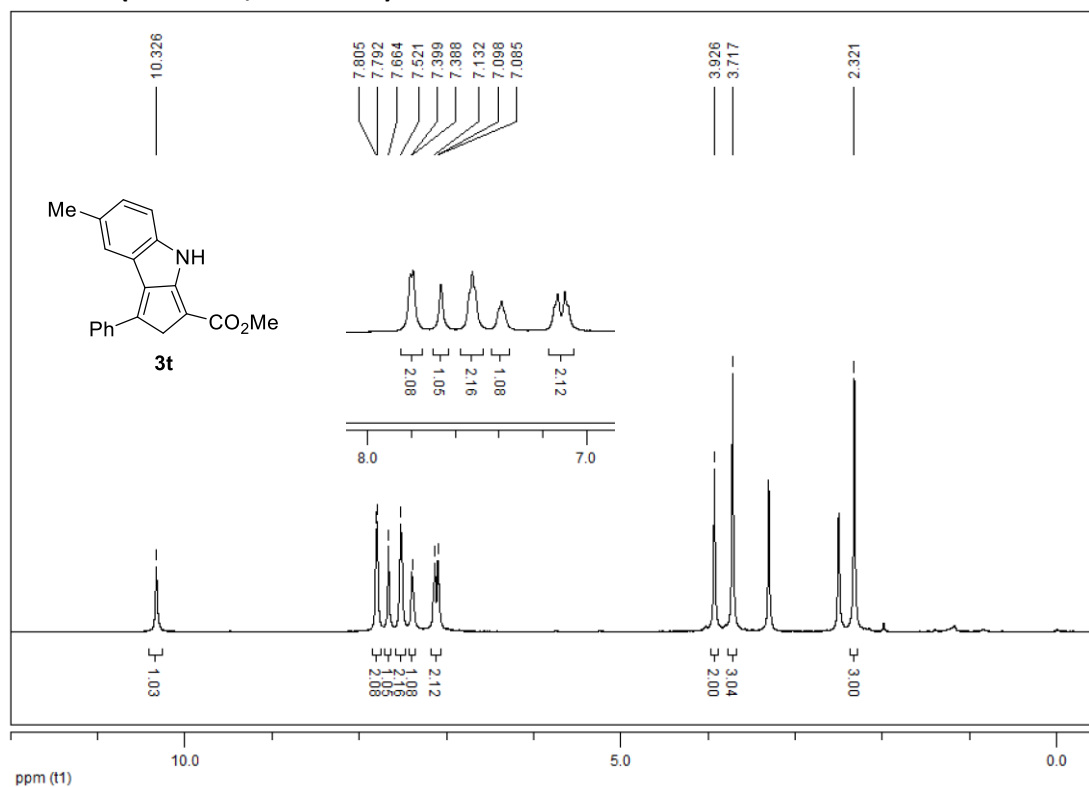

**<sup>13</sup>C{<sup>1</sup>H} NMR (126 MHz, DMSO-d<sub>6</sub>)**

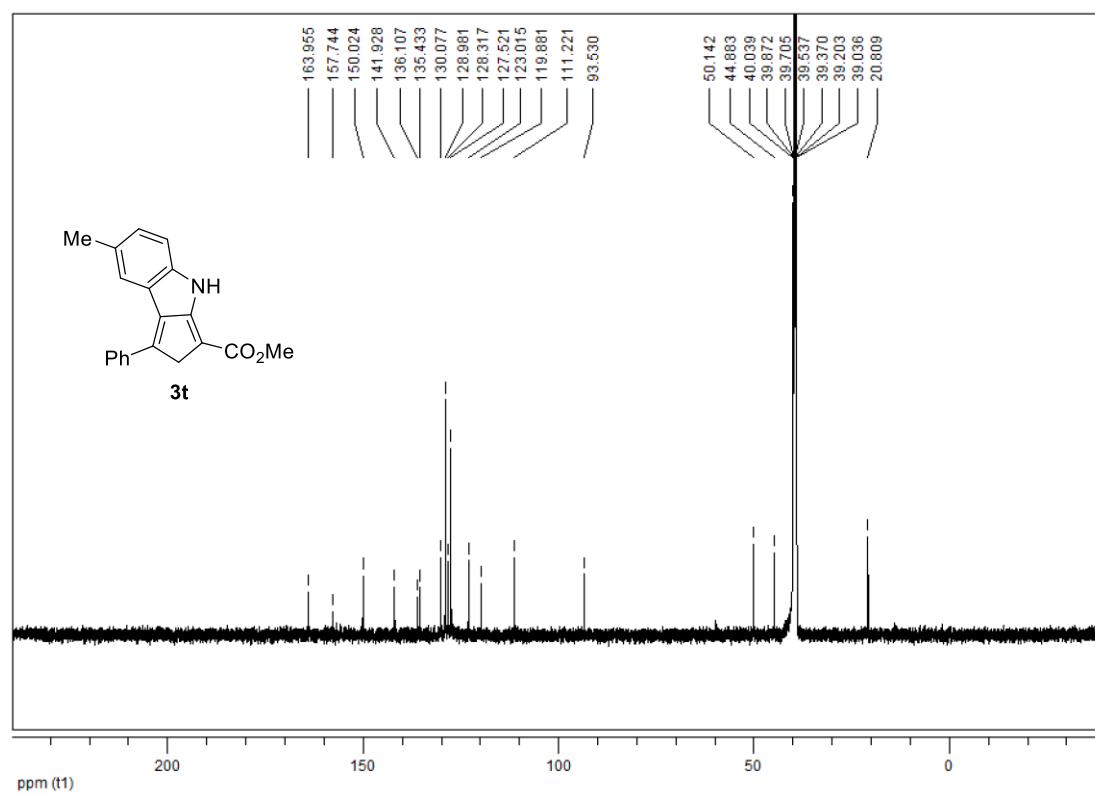

**<sup>1</sup>H NMR (500 MHz, DMSO-d<sub>6</sub>)**

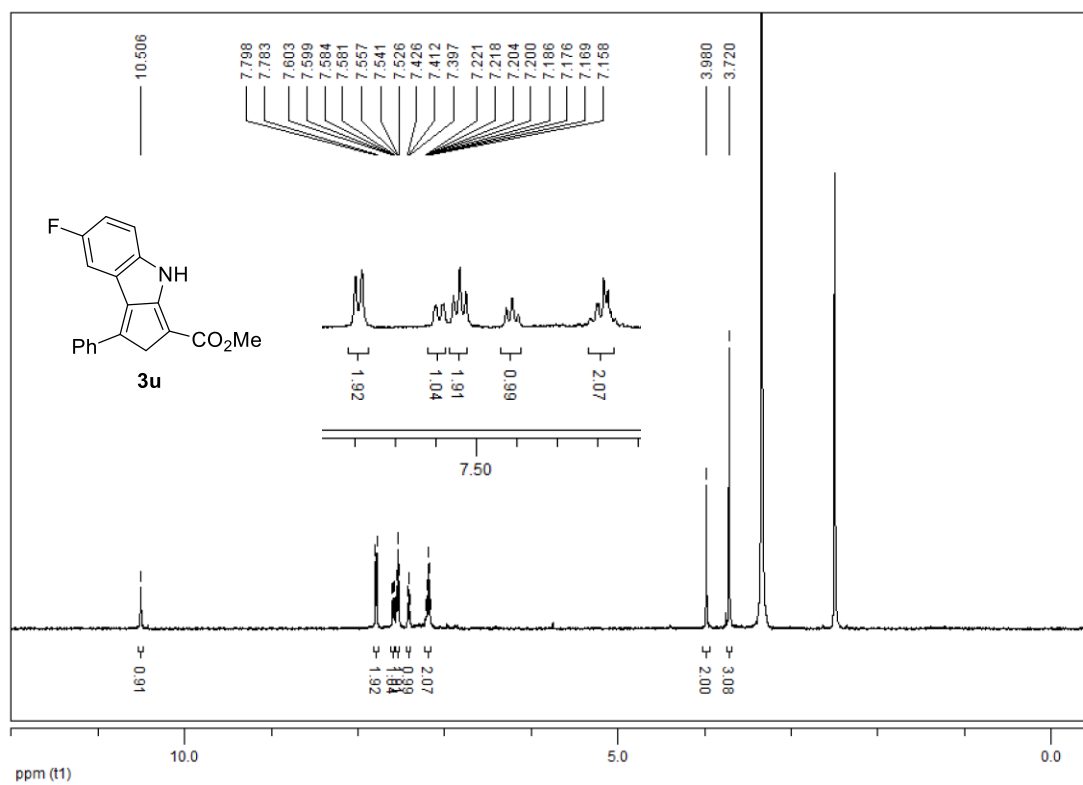

**<sup>13</sup>C{<sup>1</sup>H} NMR (126 MHz, DMSO-d<sub>6</sub>)**

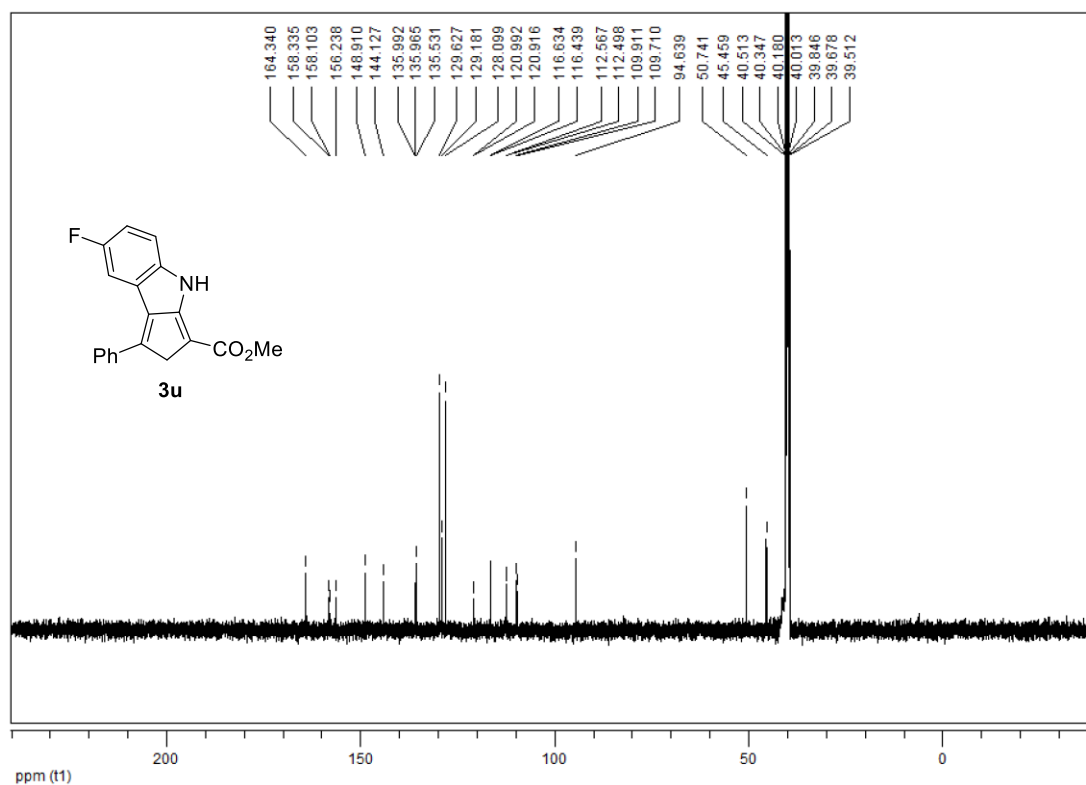

**<sup>19</sup>F NMR (376 MHz, DMSO-d<sub>6</sub>)**

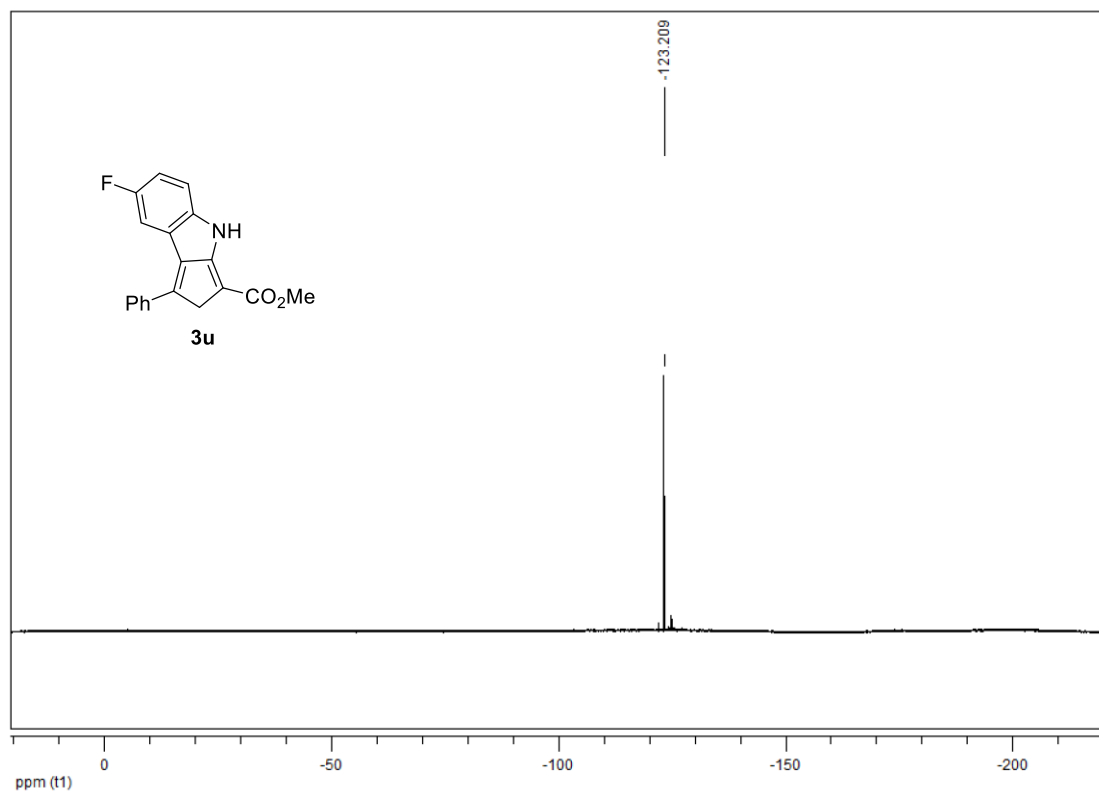



**<sup>1</sup>H NMR (500 MHz, DMSO-d<sub>6</sub>)**

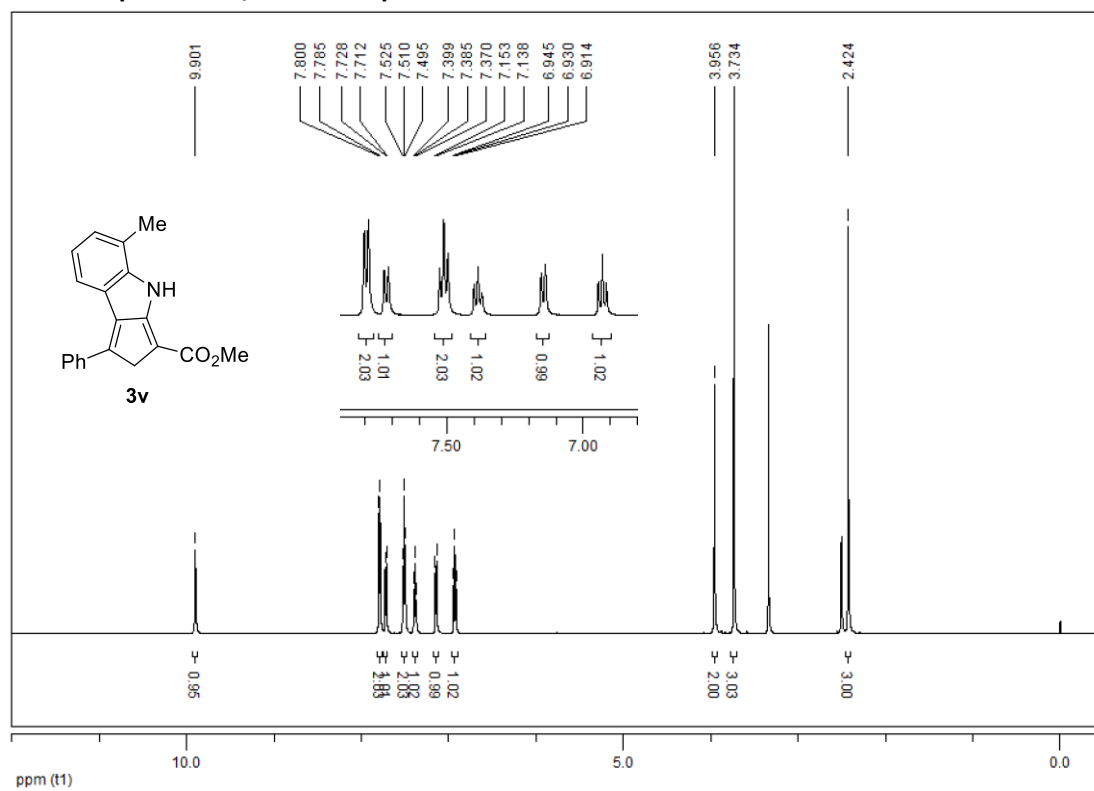

**<sup>13</sup>C{<sup>1</sup>H} NMR (126 MHz, DMSO-d<sub>6</sub>)**

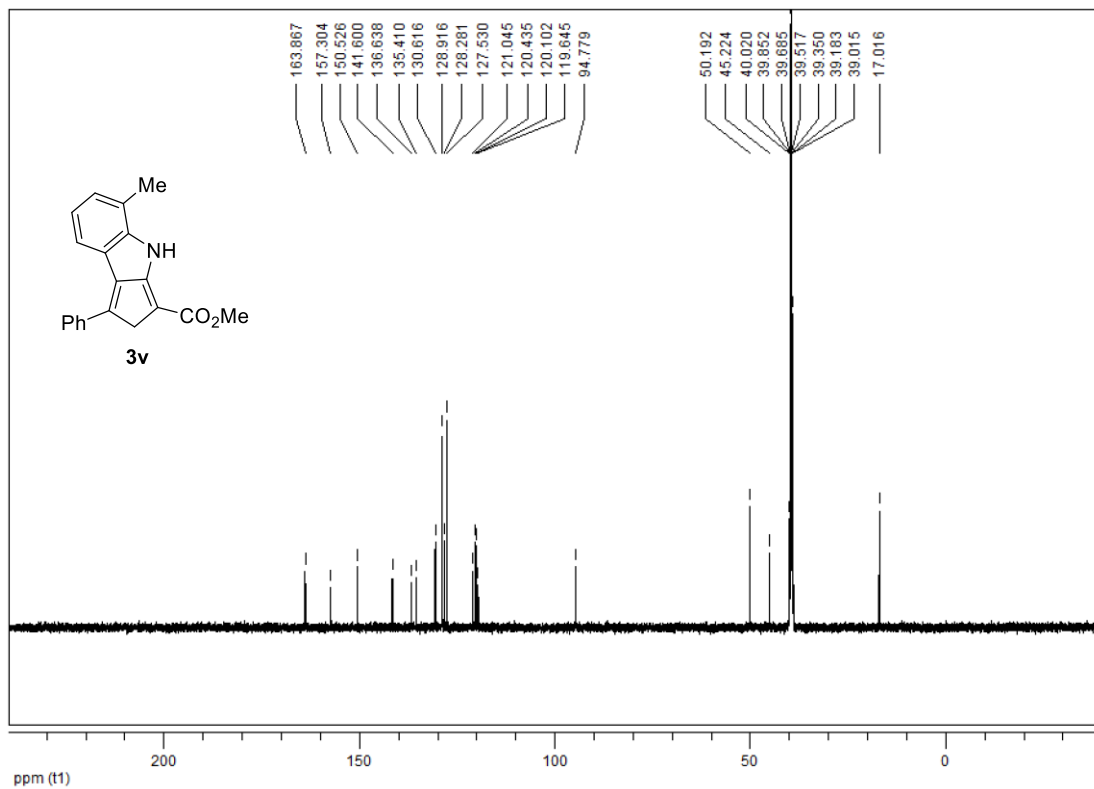

**<sup>1</sup>H NMR (500 MHz, CDCl<sub>3</sub>)**

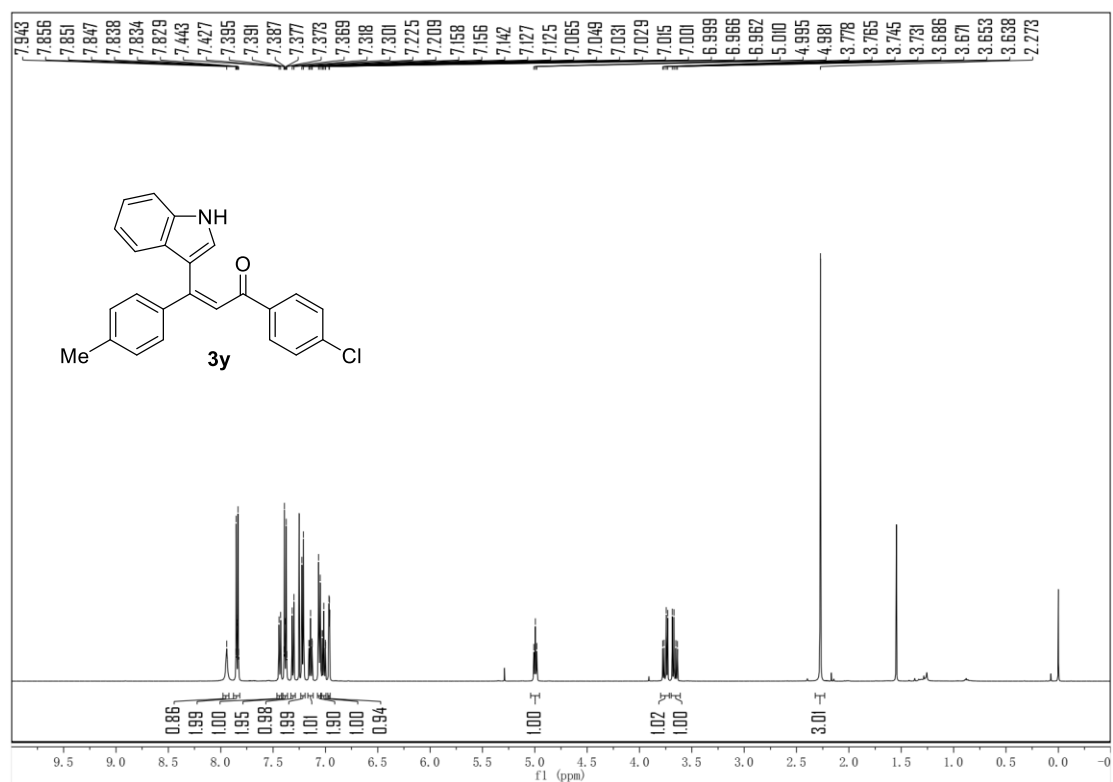

**<sup>13</sup>C{<sup>1</sup>H} NMR (126 MHz, CDCl<sub>3</sub>)**

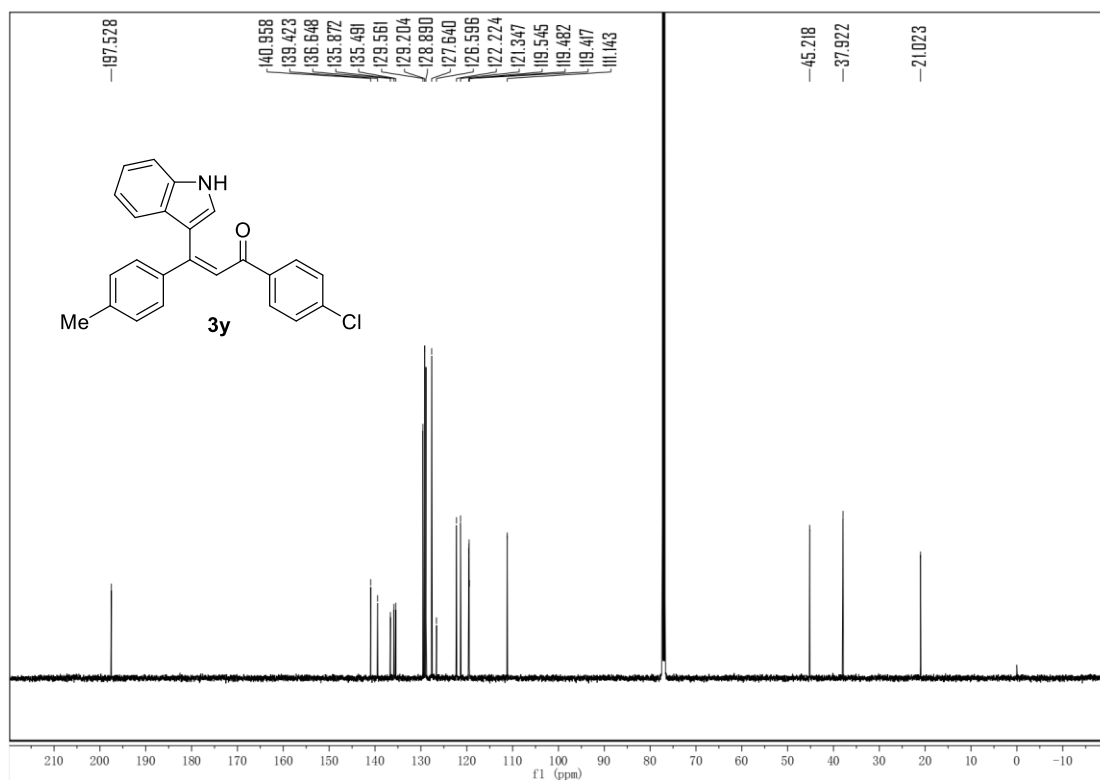

**<sup>1</sup>H NMR (500 MHz, CDCl<sub>3</sub>)**

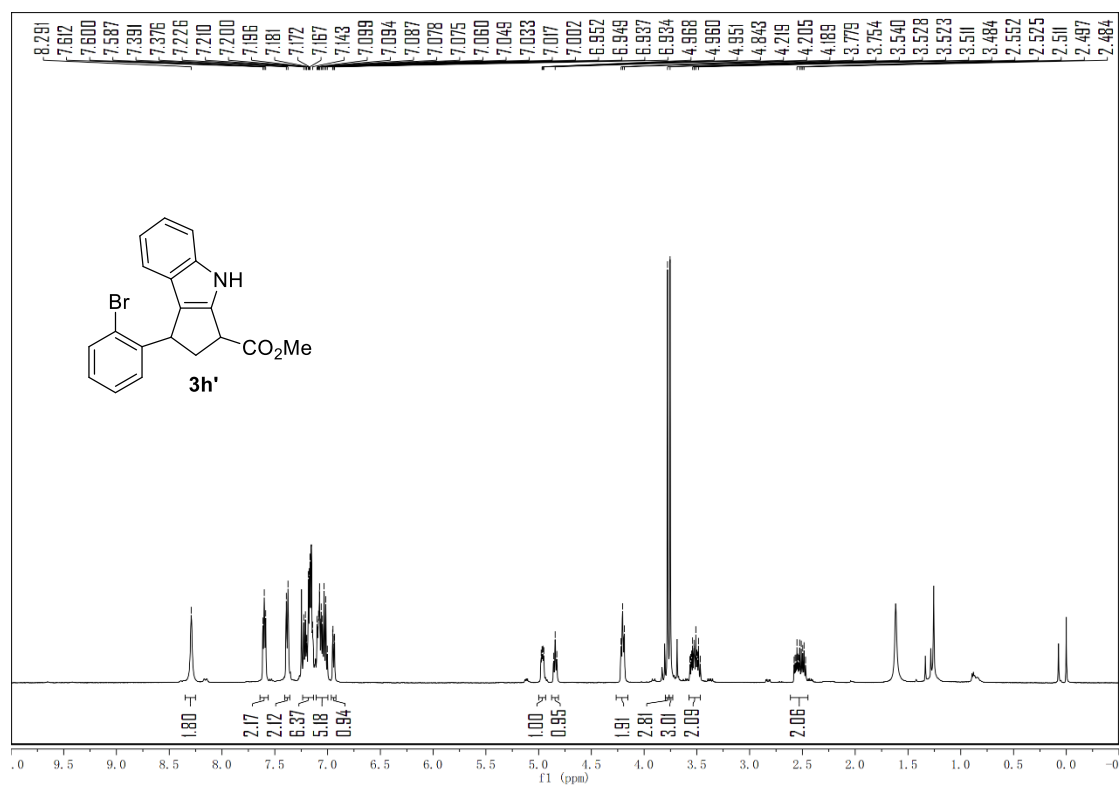

**<sup>13</sup>C{<sup>1</sup>H} NMR (126 MHz, CDCl<sub>3</sub>)**

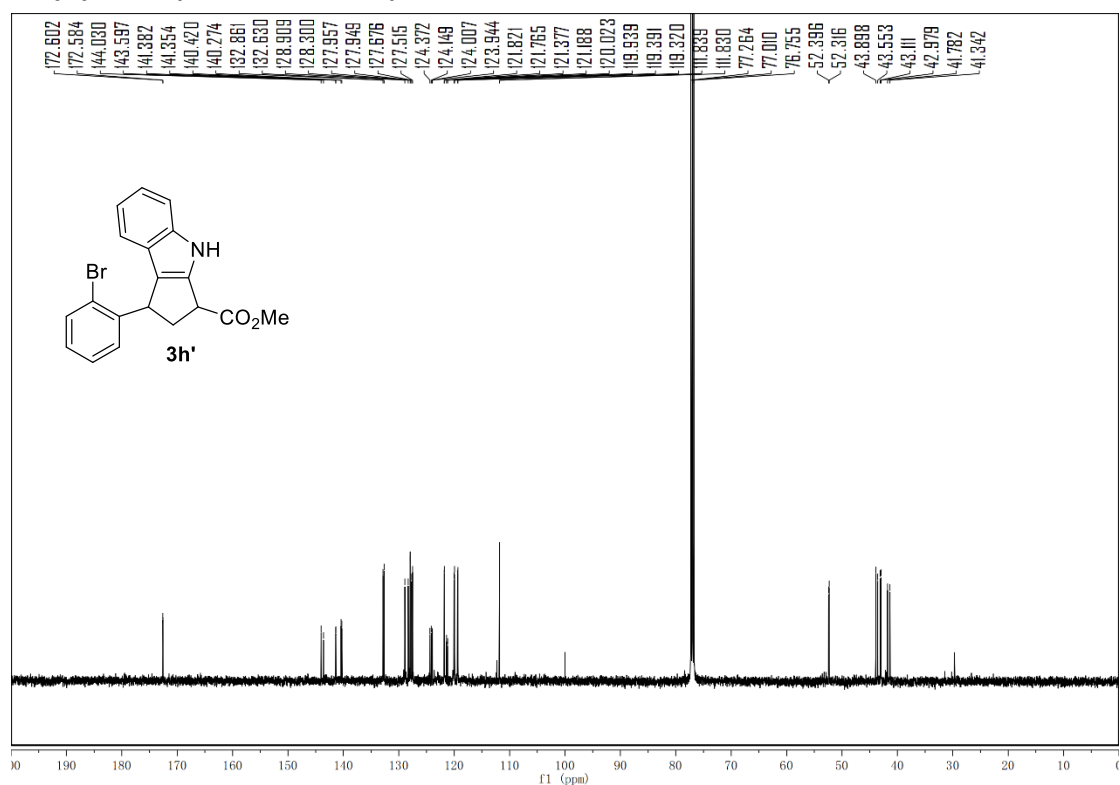



**<sup>1</sup>H NMR (500 MHz, CDCl<sub>3</sub>)**

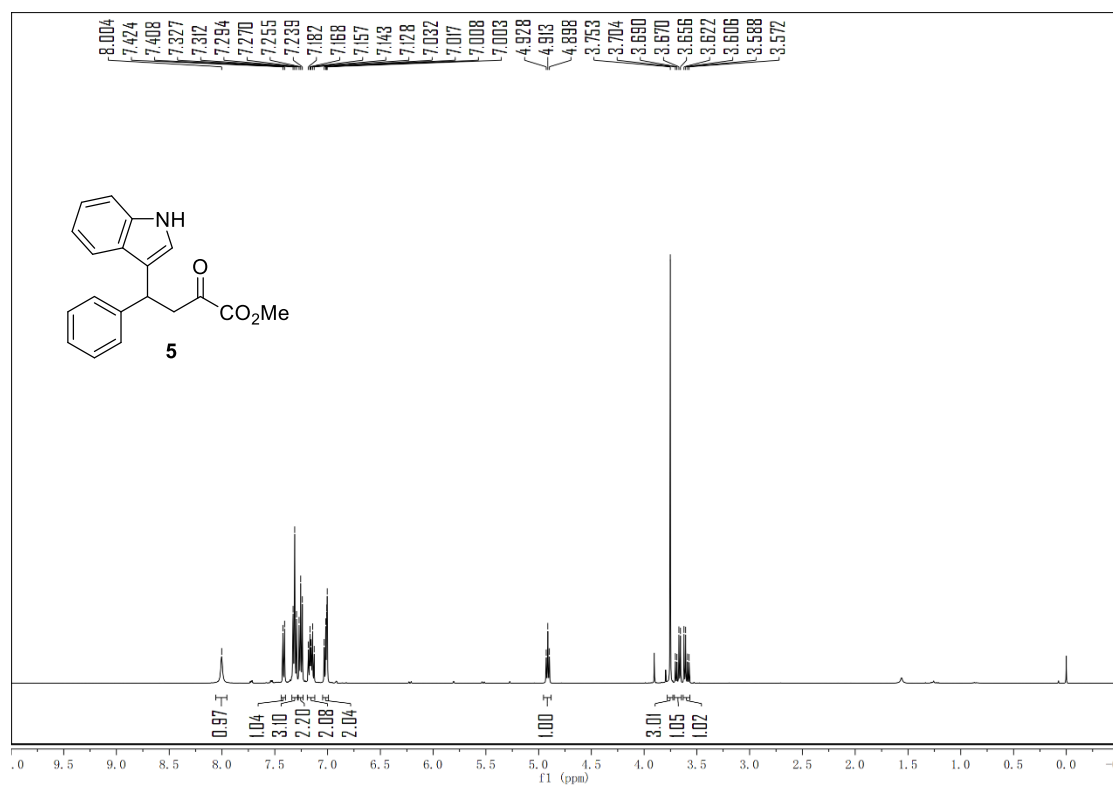

**<sup>13</sup>C{<sup>1</sup>H} NMR (126 MHz, CDCl<sub>3</sub>)**

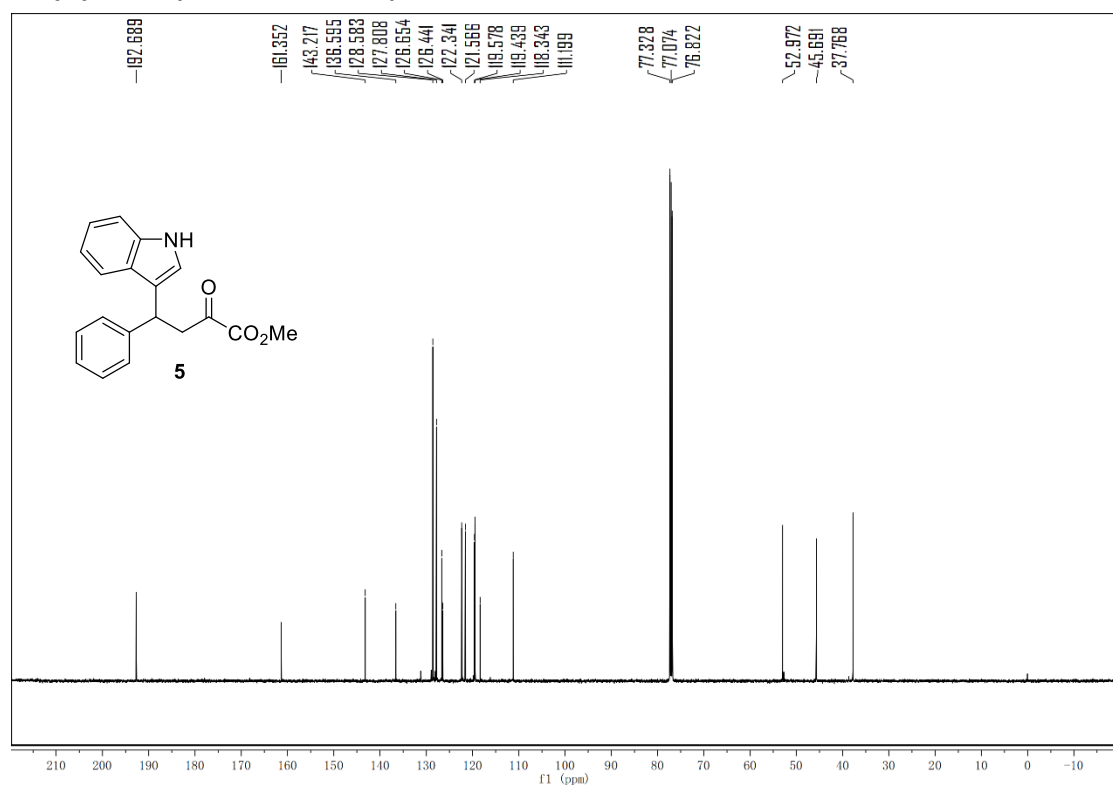

**<sup>1</sup>H NMR (500 MHz, CDCl<sub>3</sub>)**

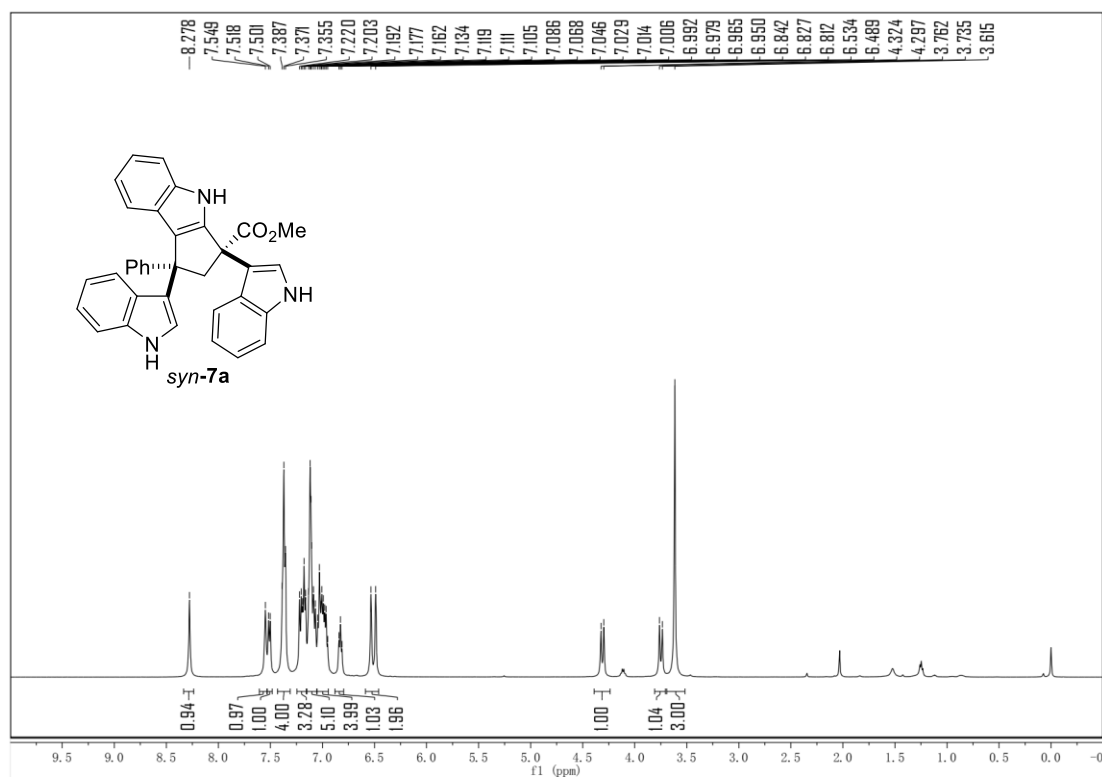

**<sup>13</sup>C{<sup>1</sup>H} NMR (126 MHz, CDCl<sub>3</sub>)**

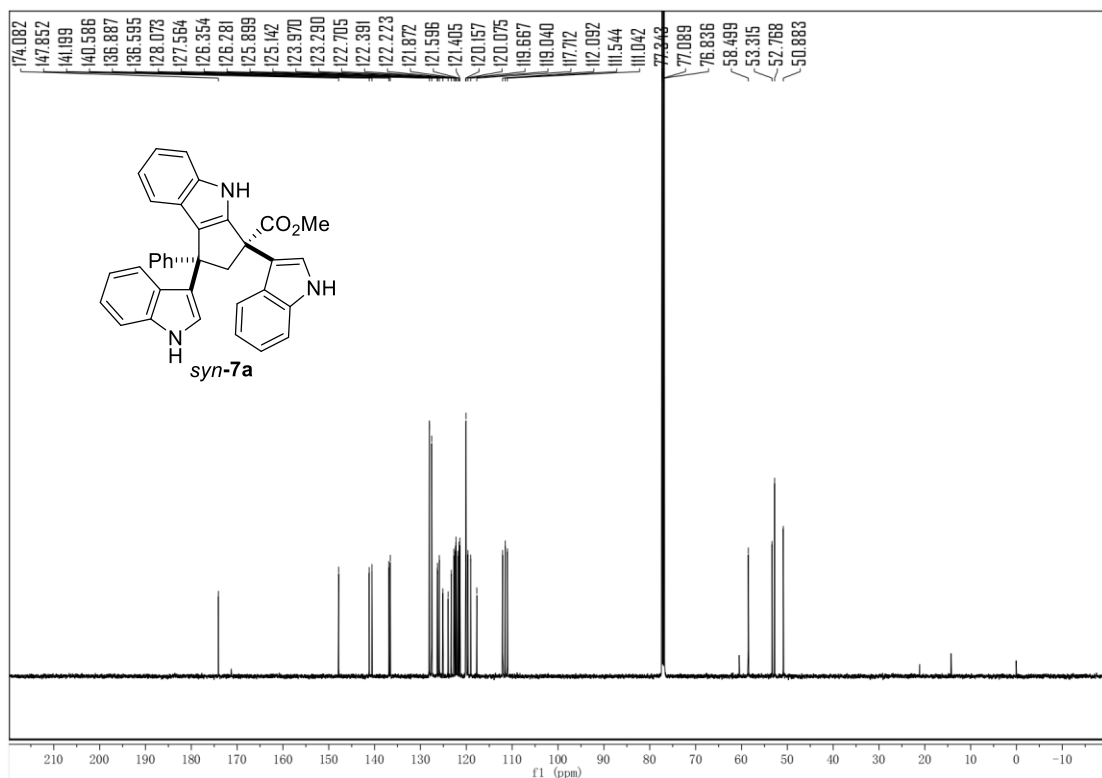

**<sup>1</sup>H NMR (500 MHz, CDCl<sub>3</sub>)**

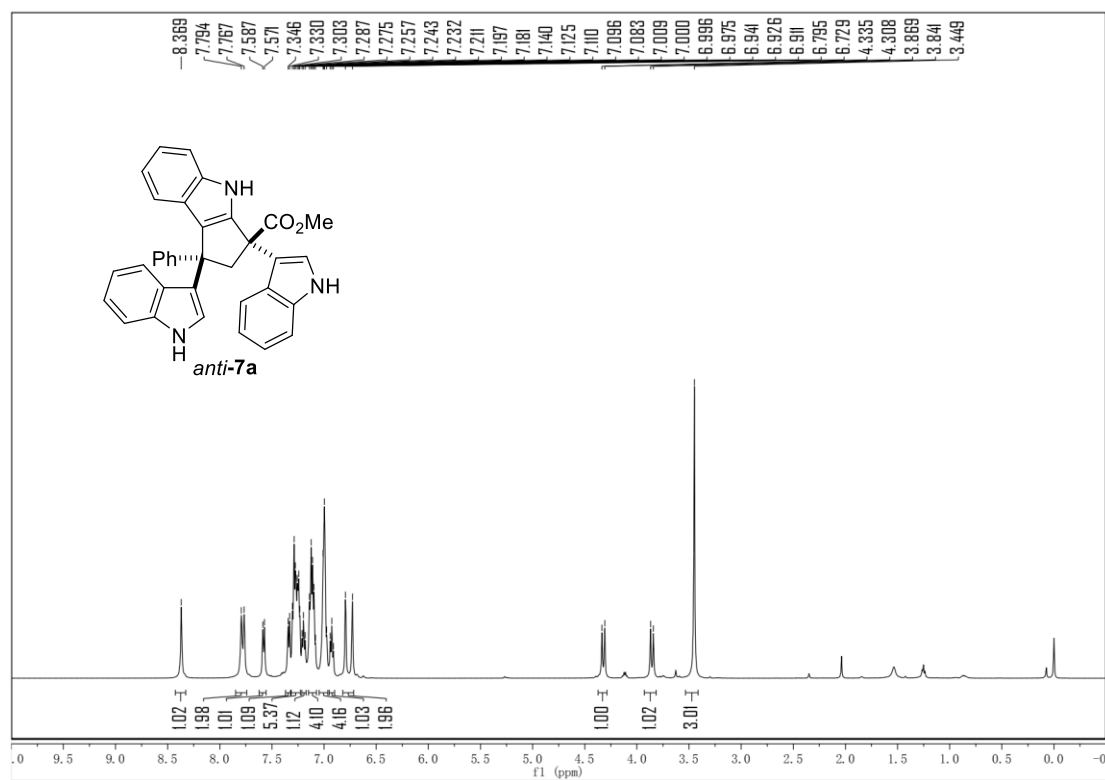

**<sup>13</sup>C{H} NMR (126 MHz, CDCl<sub>3</sub>)**

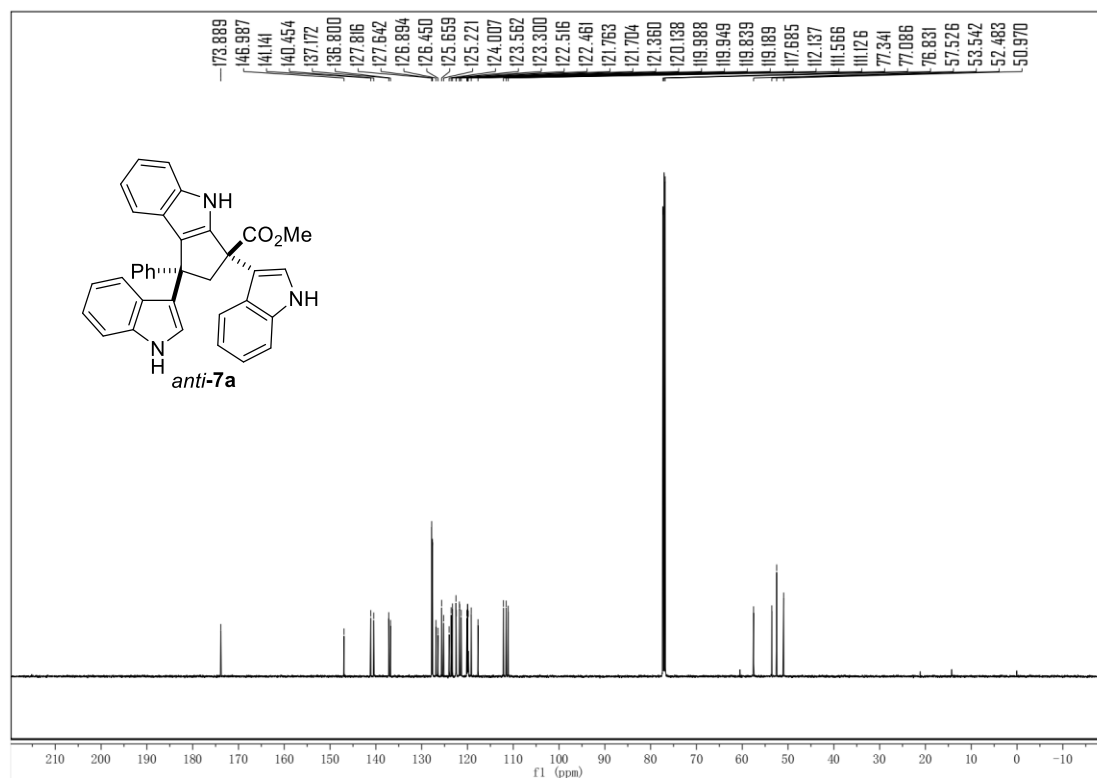

### <sup>1</sup>H NMR (500 MHz, CDCl<sub>3</sub>)

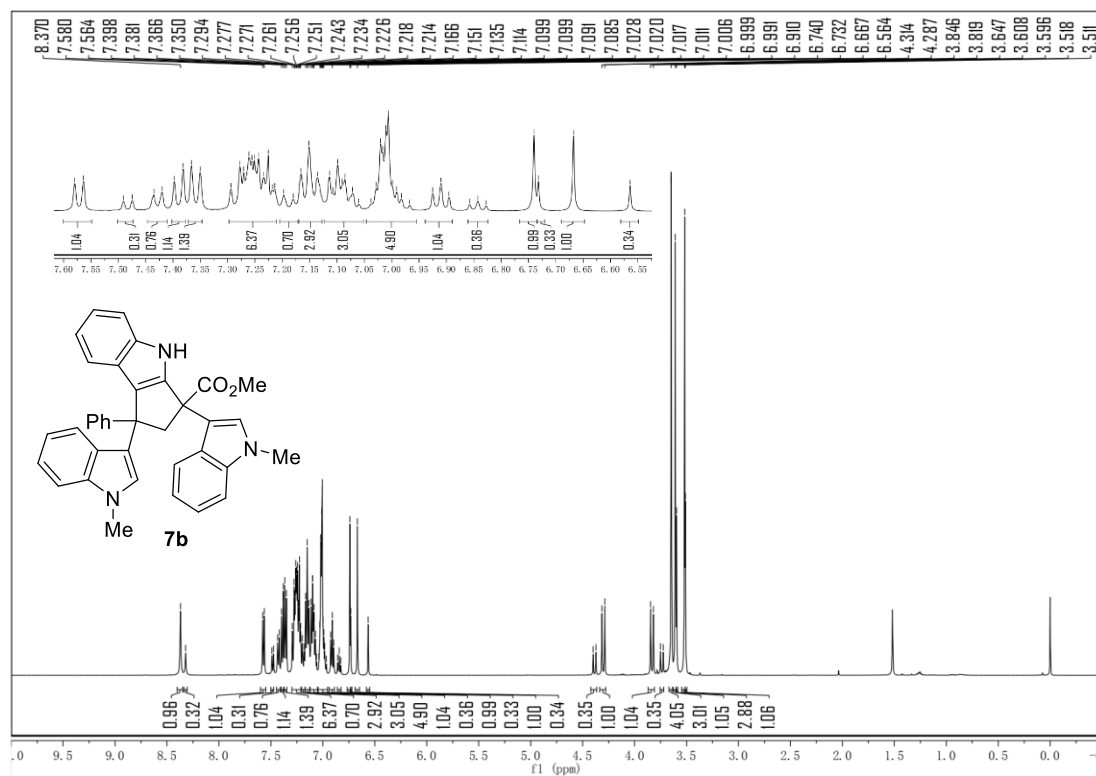

### <sup>13</sup>C{<sup>1</sup>H} NMR (126 MHz, CDCl<sub>3</sub>)

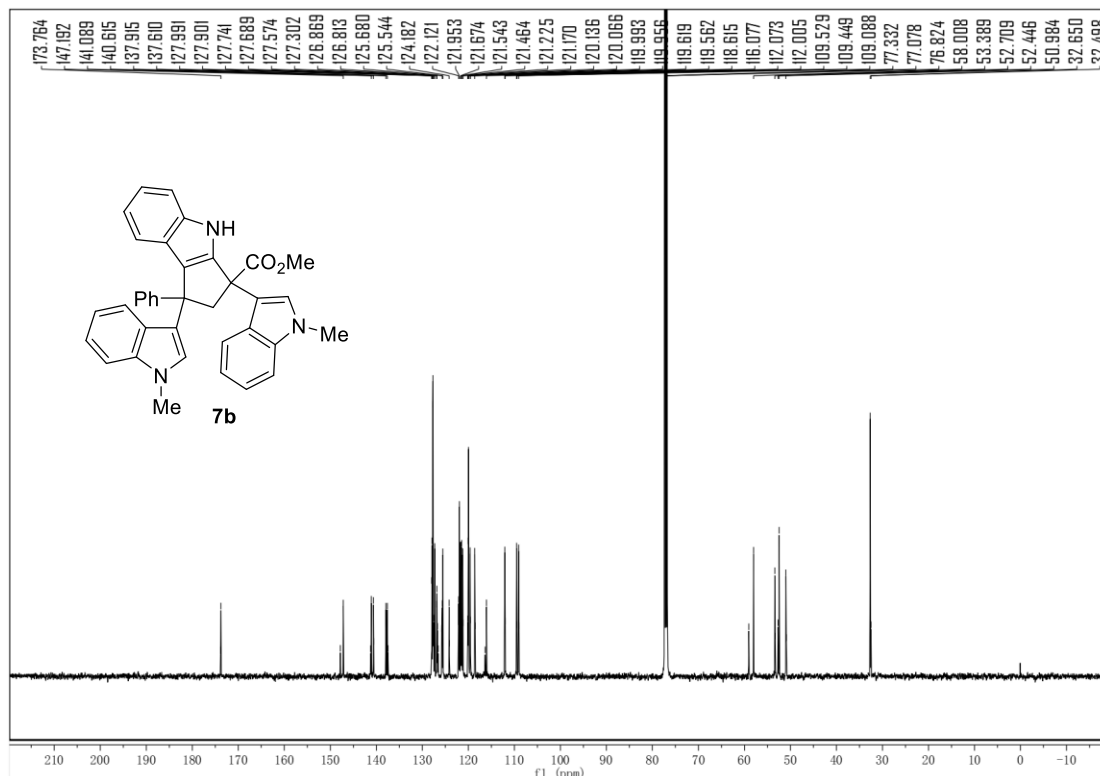



**<sup>1</sup>H NMR (500 MHz, CDCl<sub>3</sub>)**

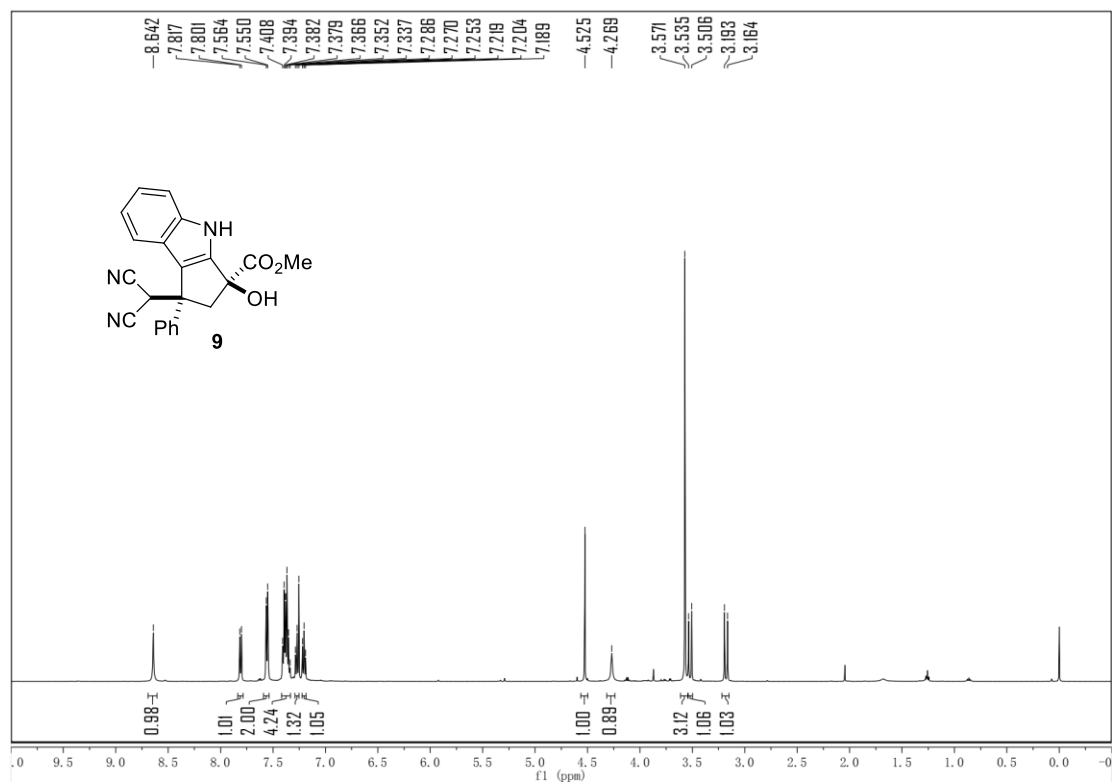

**<sup>13</sup>C{<sup>1</sup>H} NMR (126 MHz, CDCl<sub>3</sub>)**

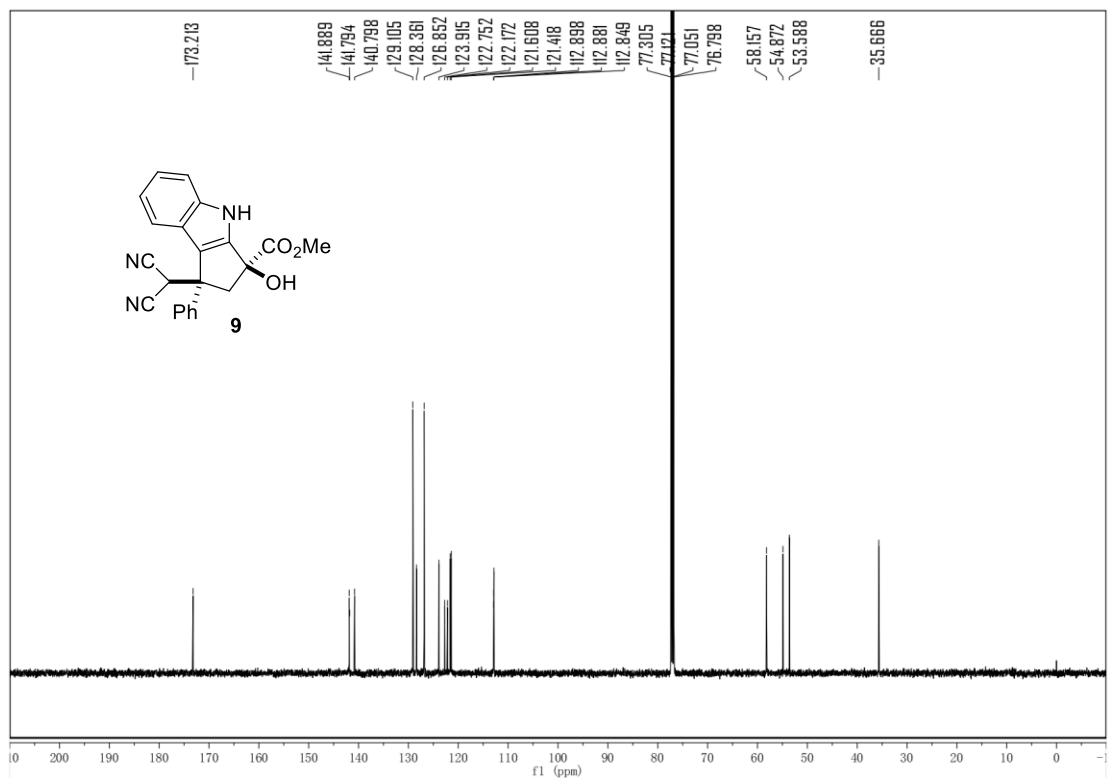

### <sup>1</sup>H NMR (500 MHz, CDCl<sub>3</sub>)

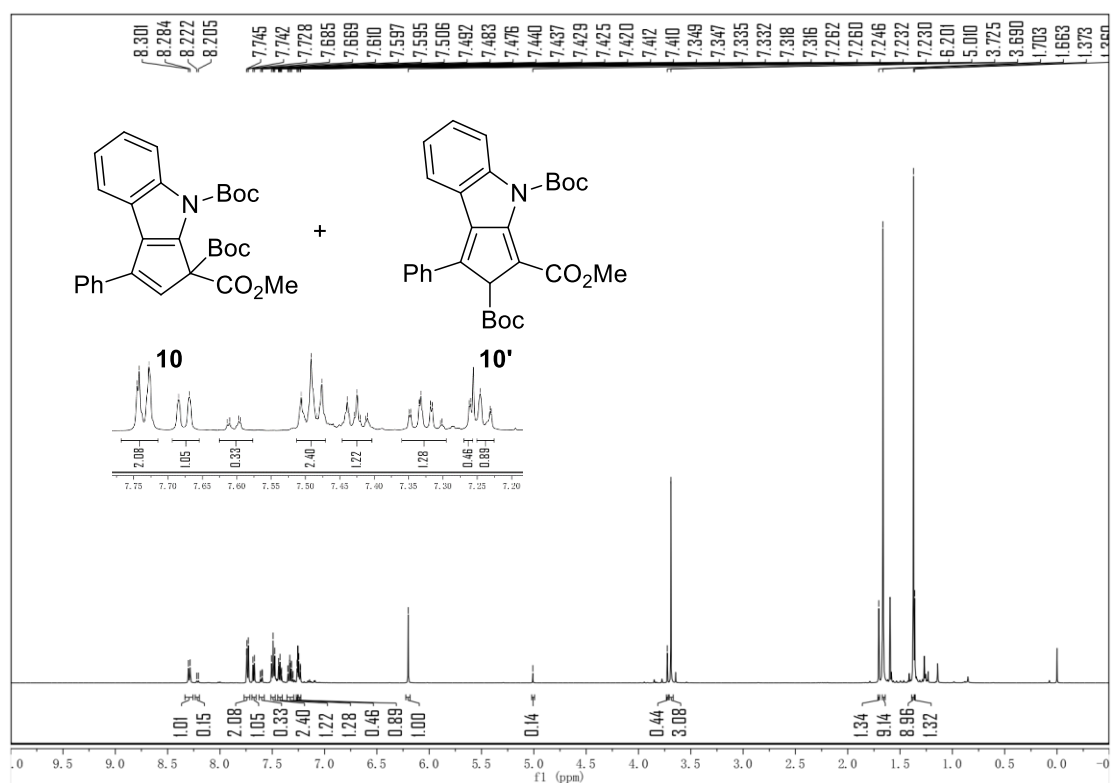

### <sup>13</sup>C{H} NMR (126 MHz, CDCl<sub>3</sub>)

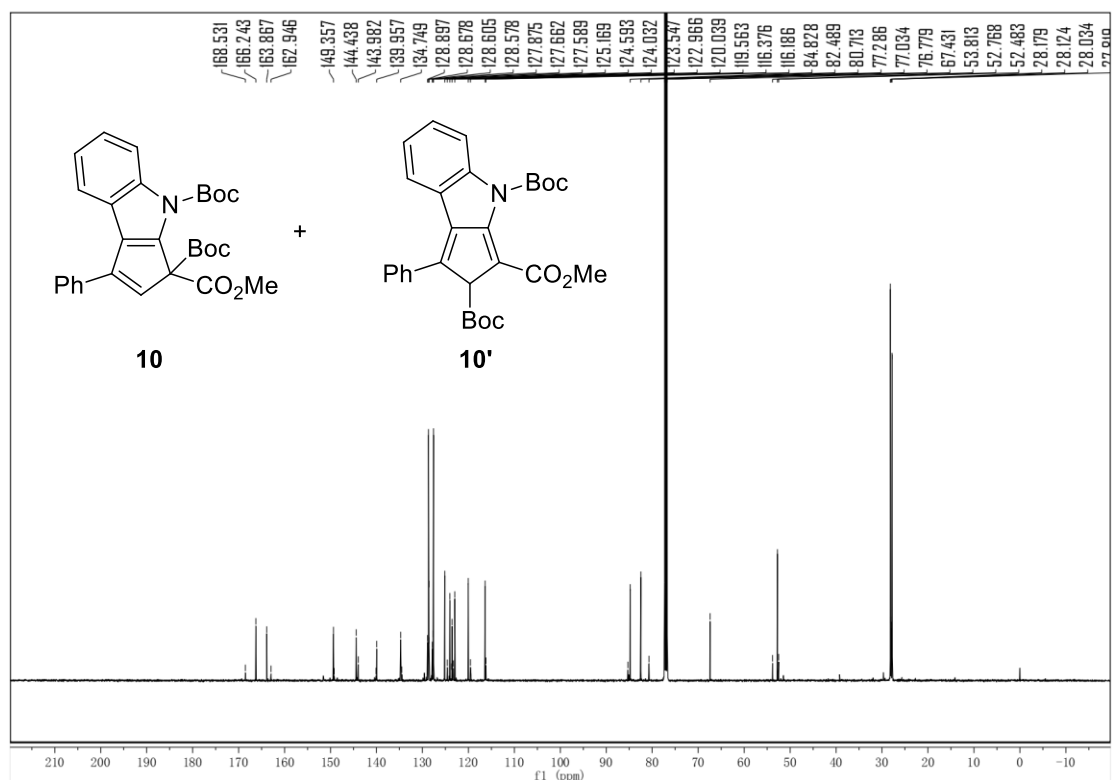

**<sup>1</sup>H NMR (500 MHz, CDCl<sub>3</sub>)**

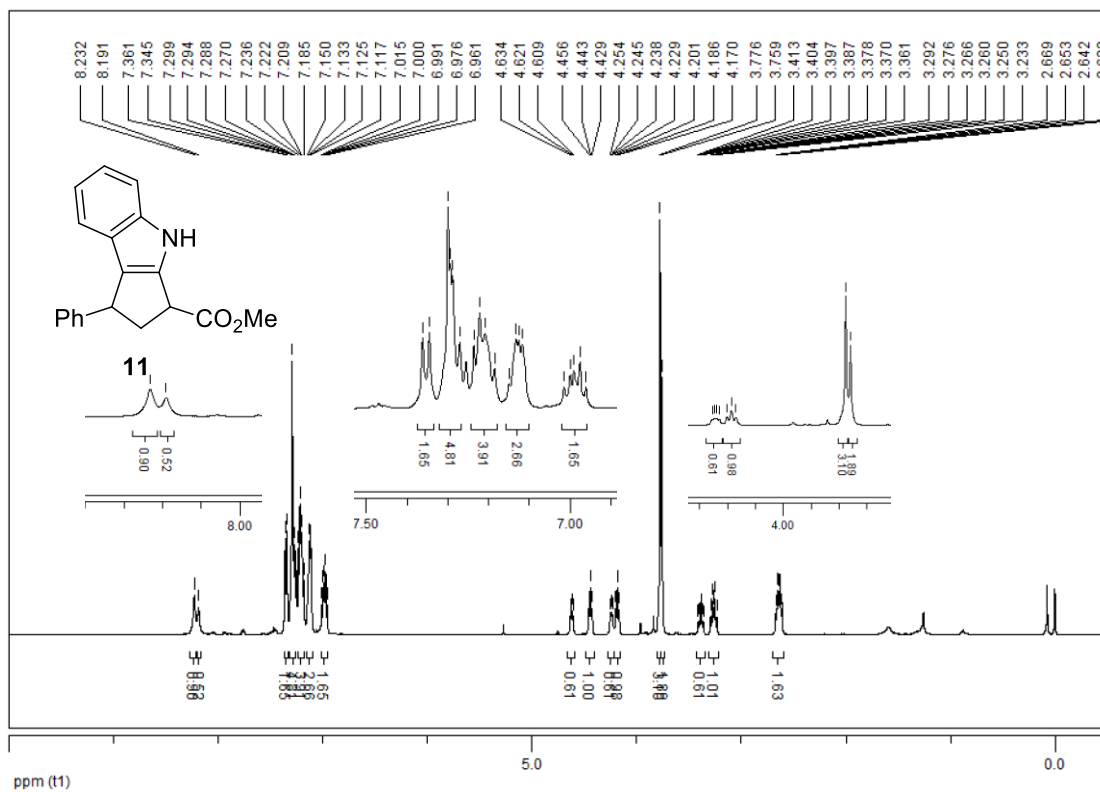

**<sup>13</sup>C{<sup>1</sup>H} NMR (126 MHz, CDCl<sub>3</sub>)**

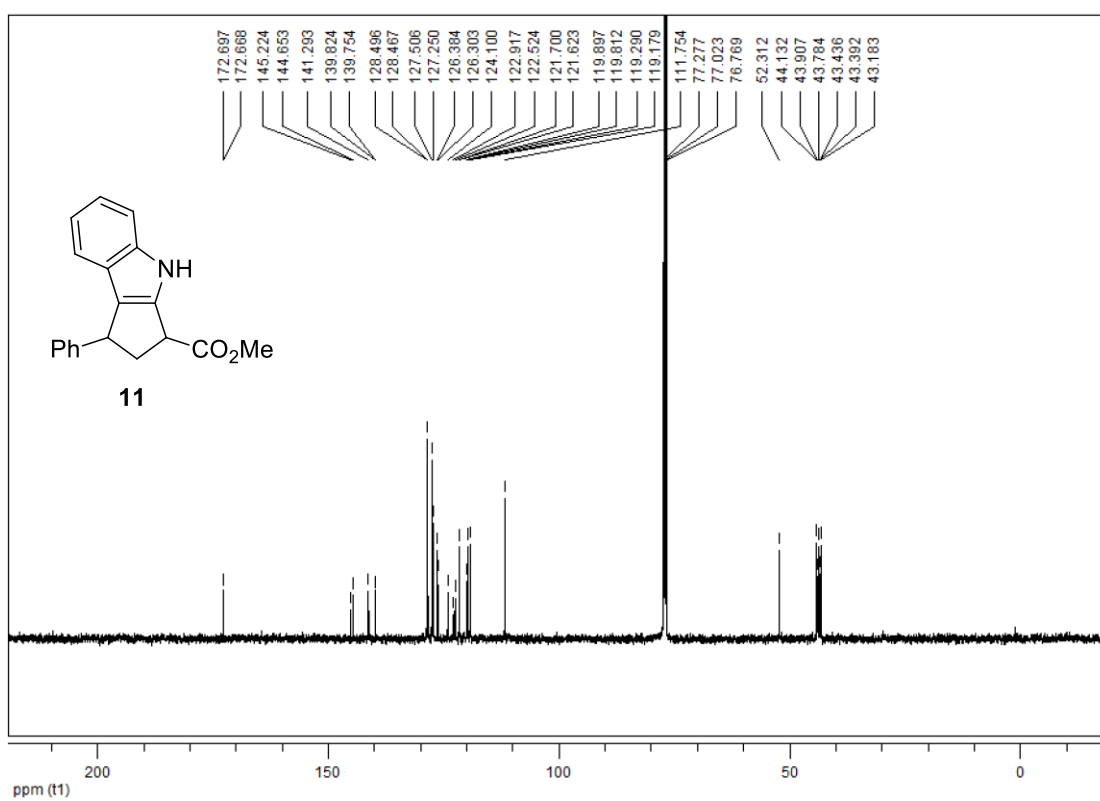

**<sup>1</sup>H NMR (500 MHz, CDCl<sub>3</sub>)**

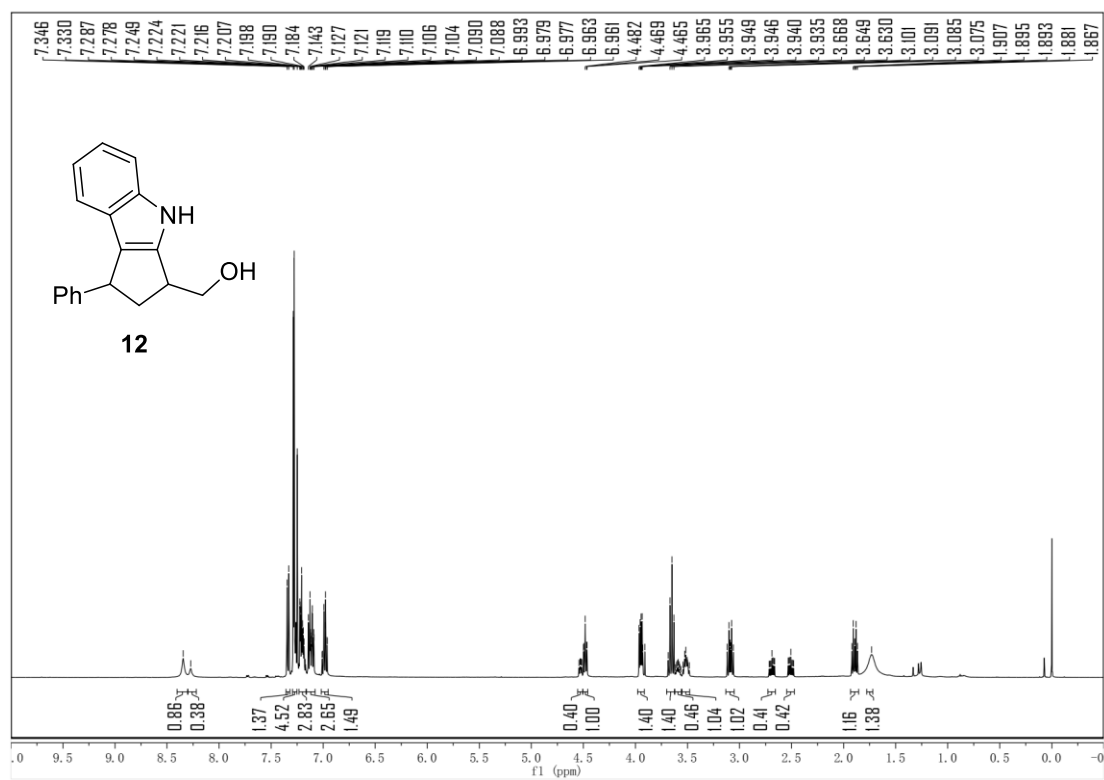

**<sup>13</sup>C{<sup>1</sup>H} NMR (126 MHz, CDCl<sub>3</sub>)**

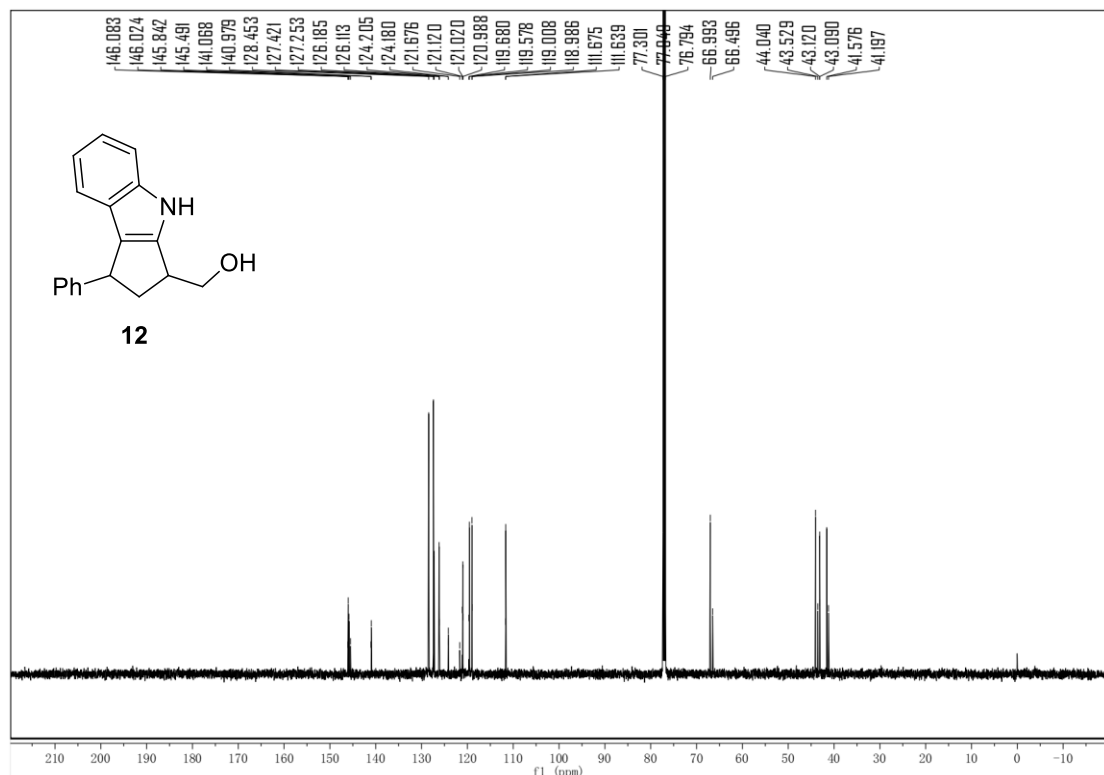

**$^1\text{H}$  NMR (500 MHz,  $\text{CDCl}_3$ )**

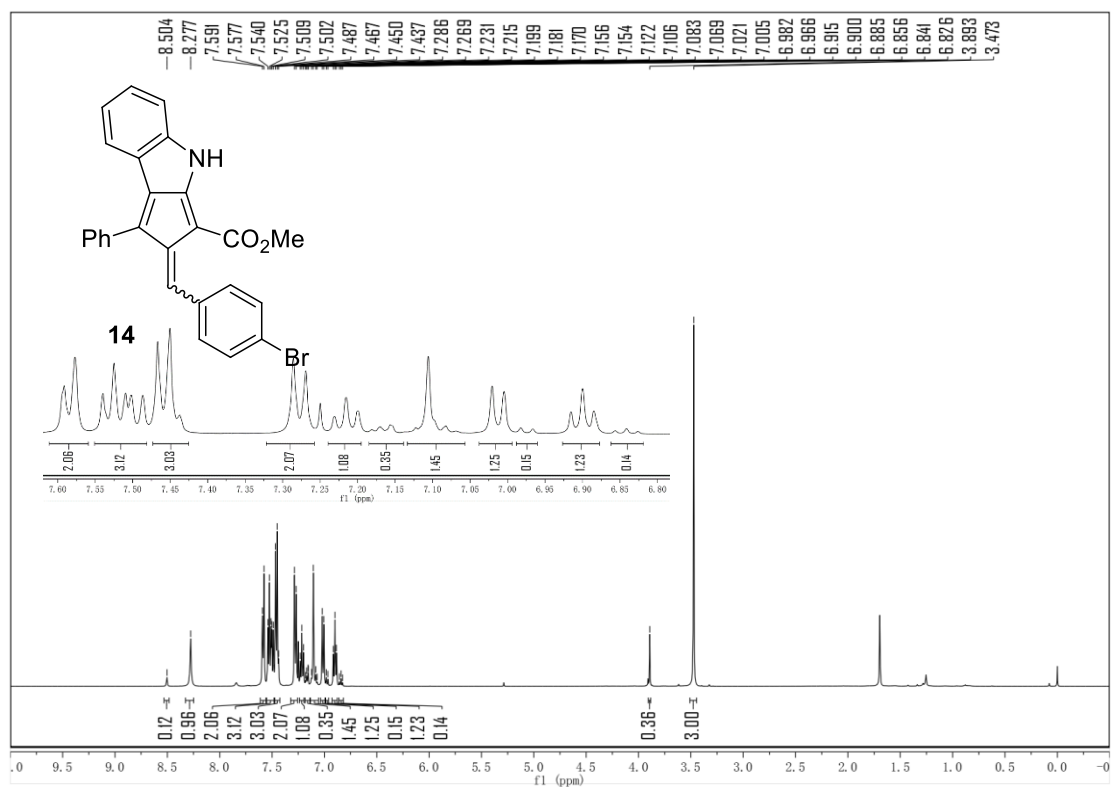

**$^{13}\text{C}\{^1\text{H}\}$  NMR (126 MHz,  $\text{CDCl}_3$ )**

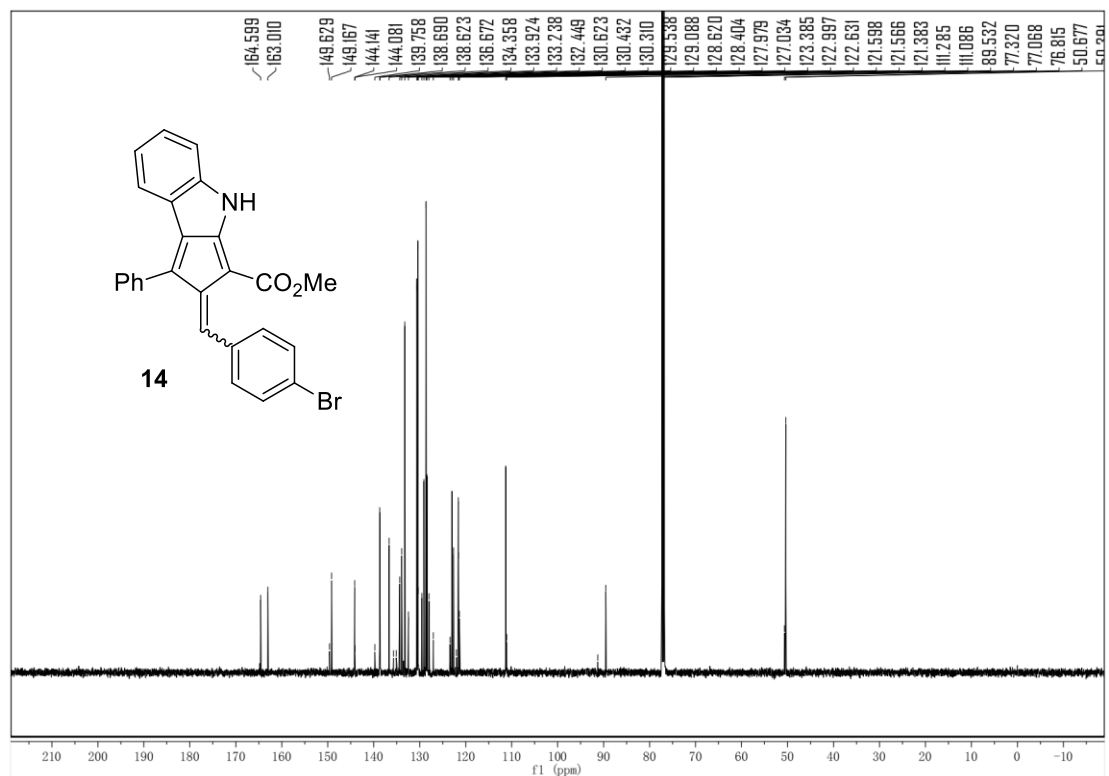

**<sup>1</sup>H NMR (500 MHz, DMSO-d<sub>6</sub>)**

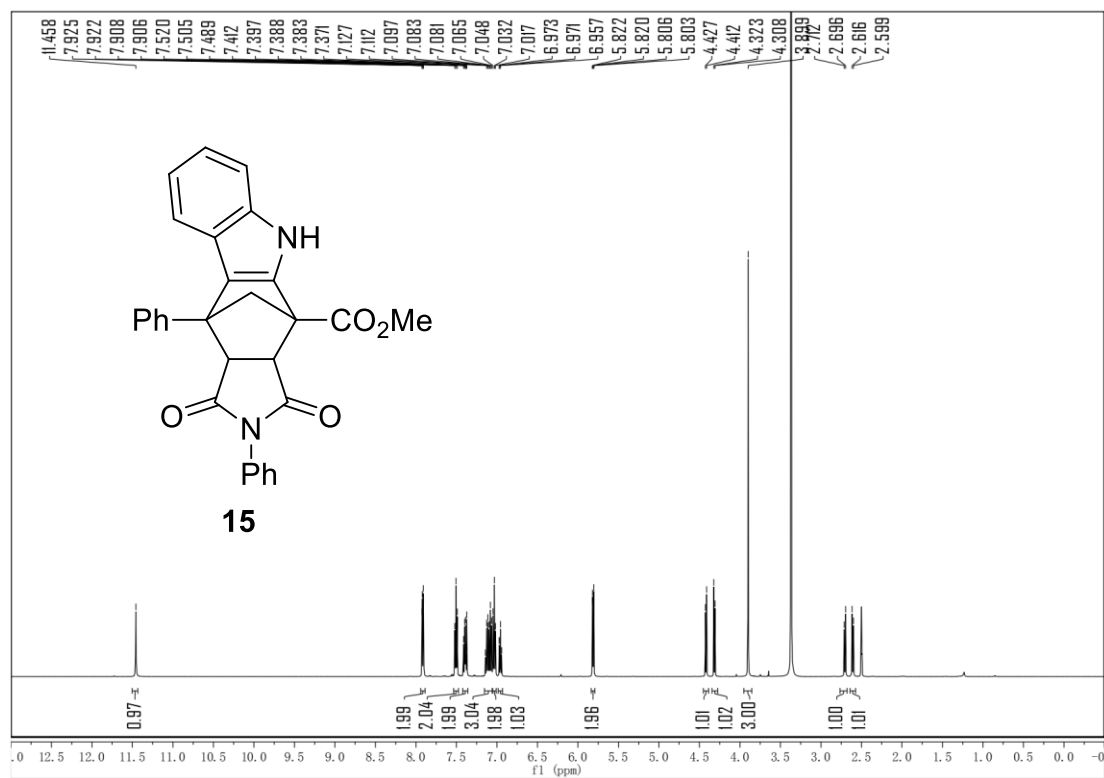

**<sup>13</sup>C{H} NMR (126 MHz, DMSO-d<sub>6</sub>)**

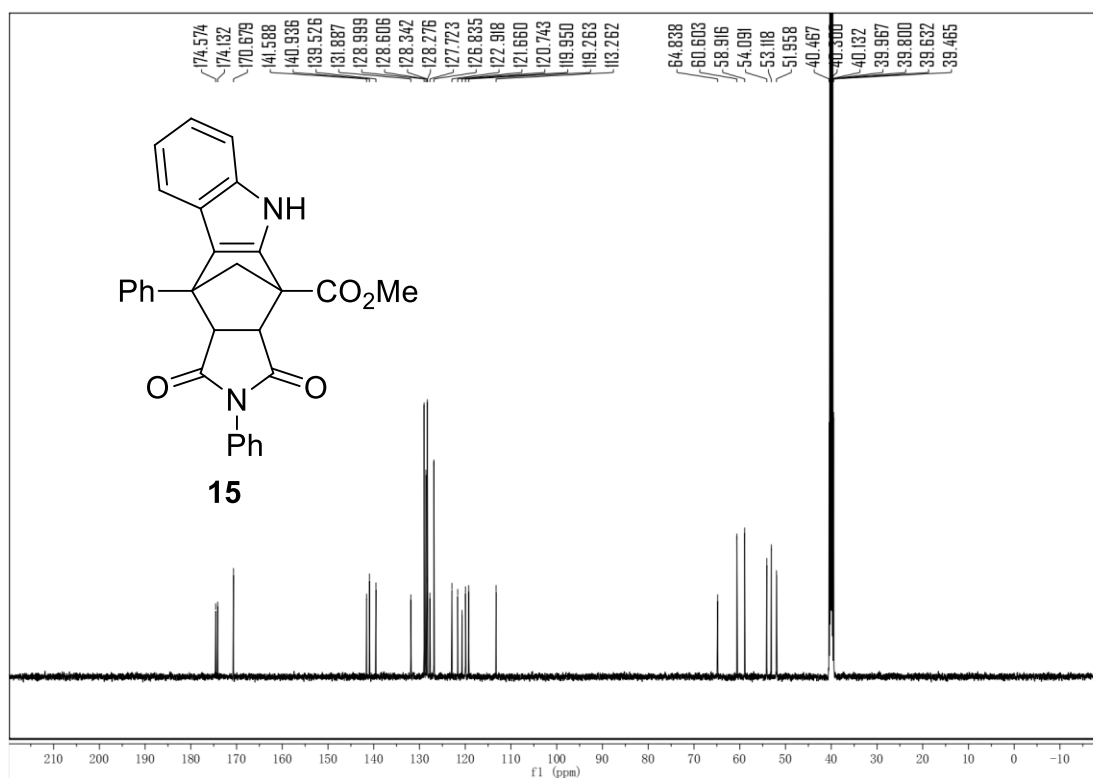

## XI. Reference

1. M. Wang, Q. Xiang, W. Si, R. Song, D. Yang, M. Li, J. Lv, *Org. Chem. Front.*, 2021, **8**, 6337-6343.
2. Q. Dai, L. Liu, Y. Qian, W. Li, J. Zhang, *Angew. Chem., Int. Ed.*, 2020, **59**, 20645-20650.
3. C. S. Sevov, J. F. Hartwig, *J. Am. Chem. Soc.*, 2013, **135**, 2116–2119.
4. Gaussian 16, Revision A.03, M. J. Frisch, G. W. Trucks, H. B. Schlegel, G. E. Scuseria, M. A. Robb, J. R. Cheeseman, J. A. Montgomery, T. Vreven, K. N. Kudin, J. C. Burant, J. M. Millam, S. S. Iyengar, J. Tomasi, V. Barone, B. Mennucci, M. Cossi, G. Scalmani, N. Rega, G. A. Petersson, H. Nakatsuji, M. Hada, M. Ehara, K. Toyota, R. Fukuda, J. Hasegawa, M. Ishida, T. Nakajima, Y. Honda, O. Kitao, H. Nakai, M. Klene, X. Li, J. E. Knox, H. P. Hratchian, J. B. Cross, V. Bakken, C. Adamo, J. Jaramillo, R. Gomperts, R. E. Stratmann, O. Yazyev, A. J. Austin, R. Cammi, C. Pomelli, J. W. Ochterski, P. Y. Ayala, K. Morokuma, G. A. Voth, P. Salvador, J. J. Dannenberg, V. G. Zakrzewski, S. Dapprich, A. D. Daniels, M. C. Strain, O. Farkas, D. K. Malick, A. D. Rabuck, K. Raghavachari, J. B. Foresman, J. V. Ortiz, Q. Cui, A. G. Baboul, S. Clifford, J. Cioslowski, B. B. Stefanov, G. Liu, A. Liashenko, P. Piskorz, I. Komaromi, R. L. Martin, D. J. Fox, T. Keith, M. A. Allaham, C. Y. Peng, A. Nanayakkara, M. Challacombe, P. M. W. Gill, B. Johnson, W. Chen, M. W. Wong, C. Gonzalez, and J. A. Pople, Wallingford CT, 2016.
5. (a) A. Becke, *Phys. Rev. A*, 1988, **38**, 3098-3100; (b) J. P. Perdew, *Phys. Rev. B*, 1986, **33**, 8822-8824; (c) J. P. Perdew, *Phys. Rev. B*, 1986, **34**, 7406-7406.
6. A. Schäfer, H. Horn, R. Ahlrichs, *J. Chem. Phys.*, 1992, **97**, 2571-2577.
7. (a) M. Dolg, H. Stoll, H. Preuss, *Theor. Chim. Acta*, 1993, **85**, 441-450; (b) A. Bergner, M. Dolg, W. Kuechle, H. Stoll, H. Preuss, *Mol. Phys.*, 1993, **80**, 1431-1441.
8. A. V. Marenich, C. J. Cramer, D. G. Truhlar, *J. Phys. Chem. B.*, 2009, **113**, 6378-6396.
9. (a) F. Weigend, F. Furche, R. Ahlrichs, *J. Chem. Phys.*, 2003, **119**, 12753-12762; (b) A. Schäfer, C. Huber, R. Ahlrichs, *J. Chem. Phys.*, 1994, **100**, 5829-5835.
10. (a) S. Grimme, J. Antony, S. Ehrlich, H. A. Krieg, *J. Chem. Phys.*, 2010, **132**, 154104; (b) S. Grimme, *J. Comput. Chem.*, 2004, **25**, 1463-1473.
11. T. Lu, F. Chen, *J. Comput. Chem.*, 2012, **33**, 580-592.

12. W. Humphrey, A. Dalke, and K. Schulten, *J. Molec. Graphics*, 1996, **14**, 33-38.
13. A. S. Aldoshin, A. A. Tabolin, S. L. Loffe, V. G. Nenajdenko, *Eur. J. Org. Chem.*, 2019, **2019**, 4384-4396.
